# Supplementary material
Source: publisher figshare collection journal article supplement (https://acs.figshare.com/ndownloader/files/21897963)
Supplement: Supplementary file 1 [file 21897963]

Supporting Information

**Picolinate Directed Arene *meta*-C-H Amination via FeCl<sub>3</sub> Catalysis**

Raghunath Reddy Anugu, Sailu Munnuri, and John R. Falck\*

*Division of Chemistry, Departments of Biochemistry and Pharmacology, University of Texas  
Southwestern Medical Center, Dallas, TX 75390, USA*

\*Corresponding author. E-mail: [j.falck@utsouthwestern.edu](mailto:j.falck@utsouthwestern.edu)

**TABLE OF CONTENTS**

|                                                   |               |
|---------------------------------------------------|---------------|
| Materials and Methods .....                       | SI-2          |
| Experimental Procedures and Analytical Data ..... | SI-2–SI-23    |
| Control Experiments .....                         | SI-23–SI-30   |
| Catalyst Screen .....                             | SI-30         |
| Reaction Optimization Studies: Table S1 .....     | SI-30–SI-31   |
| HOSA and TEA Screen: Table S2 .....               | SI-31–SI-32   |
| Directing Group Screen: Table S3 .....            | SI-32–SI-34   |
| Kinetic Isotope Study .....                       | SI-34–SI-35   |
| References .....                                  | SI-35–SI-36   |
| <sup>1</sup> H/ <sup>13</sup> C NMR Spectra ..... | SI-37–SI-112  |
| HPLC Chromatograms: Figures S1a – S1f .....       | SI-113–SI-118 |

## Materials and Methods

Proton and carbon nuclear magnetic resonance ( $^1\text{H}$  and  $^{13}\text{C}$  NMR) spectra were obtained on a Varian Inova 400 spectrometer at 400 MHz and 101 MHz, respectively, or a Varian Inova 500 at 500 MHz and 126 MHz, respectively, in  $\text{CDCl}_3$ , unless otherwise stated. The  $^1\text{H}$  and  $^{13}\text{C}$  NMR chemical shifts were measured relative to residual  $\text{CHCl}_3$  as the internal reference ( $^1\text{H}$ :  $\delta = 7.26$  ppm;  $^{13}\text{C}$ :  $\delta = 77.00$  ppm), unless otherwise stated.  $^1\text{H}$  NMR data are reported as chemical shift (ppm), multiplicity (s = singlet, br s = broad singlet, d = doublet, t = triplet, q = quartet, app q = apparent quartet, qn = quintet, m = multiplet), and coupling constant (Hz). High resolution mass spectra (HRMS) were obtained using a TripleTOF<sup>®</sup> 6600 Quadrupole mass spectrometer. Melting points were measured using an OptiMelt (Stanford Research Systems) and are uncorrected. Analytical thin layer chromatography (TLC) used EMD Chemicals TLC silica gel 60 F<sub>254</sub> plates (0.040-0.063 mm) with visualization by UV light and/or  $\text{KMnO}_4$ , phosphomolybdic acid (PMA) and/or ninhydrin solution(s) followed by heating. Chromatographic purifications utilized preparative thin layer chromatography (PTLC) or flash chromatography using pre-packed  $\text{SiO}_2$  columns on a medium pressure automated chromatograph. Unless otherwise noted, yields refer to isolated, purified material whose spectral data were consistent with assigned structures or, if known, were in agreement with literature values. All reactions were conducted under an argon atmosphere in oven-dried glassware with magnetic stirring, unless otherwise stated. Reagents were purchased at the highest commercial quality and used without further purification. Reaction solvents were purified via passage through activated, neutral alumina columns and stored under argon.  $\text{CsOH}\cdot\text{H}_2\text{O}$  and pyridine were purchased from Aldrich Chem. Co. and 1,1,1,3,3,3-hexafluoro-2-propanol (HFIP) was purchased from Oakwood Chemicals and used without purification.

## Experimental Procedures and Analytical Data

### General Procedure: Synthesis of Picolinate Esters

A mixture of alcohol (1 equiv), picolinic acid (1.2 equiv), EDCI (1.2 equiv) and DMAP (0.1 equiv) in  $\text{CH}_2\text{Cl}_2$  (0.5 M) was stirred at  $0^\circ\text{C}$  for 1 h, then warmed to room temperature for 12-24 h. All volatiles were removed *in vacuo*. The residue was purified using a commercial pre-packed  $\text{SiO}_2$  on a medium pressure, automated chromatograph using EtOAc/hexanes to furnish the picolinate ester(s) in the indicated yield.

### Benzyl picolinate (**1**)

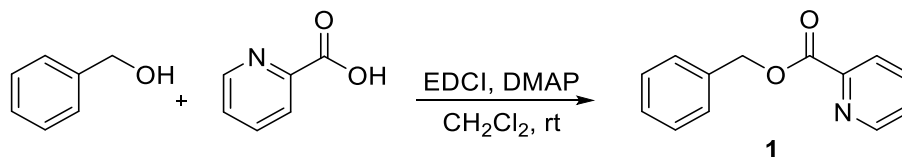

Following the general picolinate ester procedure, benzyl alcohol (500 mg, 4.627 mmol), picolinic acid (683 mg, 5.552 mmol), EDCI (1.06 g, 5.552 mmol) and DMAP (56 mg, 0.462 mmol) were stirred at rt in  $\text{CH}_2\text{Cl}_2$  (20 mL) for 16 h. Chromatographic purification of the crude product afforded benzyl picolinate (**1**) (818 mg, 83%) as an oil whose spectral data were in agreement with literature values.<sup>1</sup> TLC:  $R_f \approx 0.5$  (50% EtOAc/hexanes).

### 4-Methylbenzyl picolinate

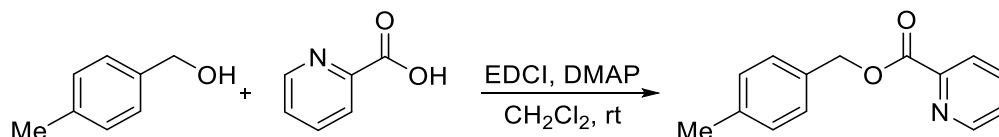

Following the general picolinate ester procedure, 4-methylbenzyl alcohol (200 mg, 1.638 mmol), picolinic acid (241 mg, 1.966 mmol), EDCI (376 mg, 1.966 mmol) and DMAP (20 mg, 0.163 mmol) were stirred at rt in  $\text{CH}_2\text{Cl}_2$  (10 mL) for 16 h. Chromatographic purification of the crude product afforded 4-methylbenzyl picolinate (331 mg, 89%) as an oil. TLC:  $R_f \approx 0.5$  (40% EtOAc/hexanes).  $^1\text{H}$  NMR (400 MHz,  $\text{CDCl}_3$ )  $\delta$  8.74 (d,  $J = 4.2$  Hz, 1H), 8.10 (d,  $J = 7.8$  Hz, 1H), 7.79 (td,  $J = 7.7, 1.5$  Hz, 1H), 7.45–7.41 (m, 1H), 7.37 (d,  $J = 7.8$  Hz, 2H), 7.16 (d,  $J = 7.7$  Hz, 2H), 5.40 (s, 2H), 2.33 (s, 3H);  $^{13}\text{C}$  NMR (101 MHz,  $\text{CDCl}_3$ )  $\delta$  165.08, 149.96, 148.11, 138.31, 136.99, 132.68, 129.30, 128.82, 126.93, 125.28, 67.52, 21.28. HRMS (ESI<sup>+</sup>) Calcd. for  $[\text{C}_{14}\text{H}_{13}\text{NO}_2 + \text{H}]^+$  228.1024, Found 228.1030.

### 2-Methylbenzyl picolinate

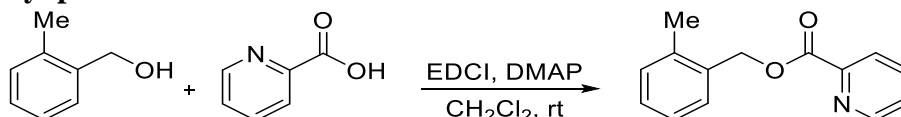

Following the general picolinate ester procedure, 2-methylbenzyl alcohol (200 mg, 1.638 mmol), picolinic acid (241 mg, 1.966 mmol), EDCI (376 mg, 1.966 mmol) and DMAP (20 mg, 0.163 mmol) were stirred at rt in  $\text{CH}_2\text{Cl}_2$  (10 mL) for 16 h. Chromatographic purification of the crude product afforded 2-methylbenzyl picolinate (290 mg, 78%) as a solid, mp 60–62 °C. TLC:  $R_f \approx 0.5$  (40% EtOAc/hexanes).  $^1\text{H}$  NMR (400 MHz,  $\text{CDCl}_3$ )  $\delta$  8.76 (d,  $J = 4.6$  Hz, 1H), 8.11 (d,  $J = 7.8$  Hz, 1H), 7.81 (tt,  $J = 7.8, 1.9$  Hz, 1H), 7.48–7.40 (m, 2H), 7.28–7.18 (m, 3H), 5.46 (s, 2H), 2.42 (s, 3H);  $^{13}\text{C}$  NMR (101 MHz,  $\text{CDCl}_3$ )  $\delta$  165.05, 150.11, 148.08, 137.18, 137.04, 133.64, 130.50, 129.54, 128.73, 126.99, 126.14, 125.29, 66.02, 19.18. HRMS (ESI<sup>+</sup>) Calcd. for  $[\text{C}_{14}\text{H}_{13}\text{NO}_2 + \text{H}]^+$  228.1025, Found 228.1031.

### 2,6-Dimethylbenzyl picolinate

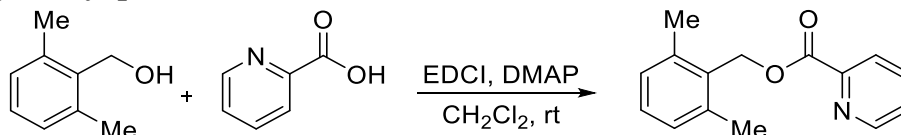

Following the general picolinate ester procedure, 2,6-dimethylbenzyl alcohol (200 mg, 1.470 mmol), picolinic acid (217 mg, 1.764 mmol), EDCI (338 mg, 1.764 mmol) and DMAP (17 mg, 0.147 mmol) were stirred at rt in  $\text{CH}_2\text{Cl}_2$  (10 mL) for 16 h. Chromatographic purification of the crude product afforded 2,6-dimethylbenzyl picolinate (276 mg, 78%) as a solid, mp 80–82 °C. TLC:  $R_f \approx 0.4$  (30% EtOAc/hexanes).  $^1\text{H}$  NMR (400 MHz,  $\text{CDCl}_3$ )  $\delta$  8.75 (d,  $J = 4.7$  Hz, 1H), 8.06 (d,  $J = 7.9$  Hz, 1H), 7.79 (tt,  $J = 7.8, 1.9$  Hz, 1H), 7.47–7.41 (m, 1H), 7.18–7.13 (m, 1H), 7.06 (d,  $J = 7.6$  Hz, 2H), 5.51 (s, 2H), 2.45 (s, 6H);  $^{13}\text{C}$  NMR (101 MHz,  $\text{CDCl}_3$ )  $\delta$  165.26, 150.15, 148.09, 138.65, 137.01, 131.74, 128.94, 128.45, 126.92, 125.26, 62.72, 19.91. HRMS (ESI<sup>+</sup>) Calcd. for  $[\text{C}_{15}\text{H}_{15}\text{NO}_2 + \text{H}]^+$  242.1181, Found 242.1182.

### 4-Methoxybenzyl picolinate

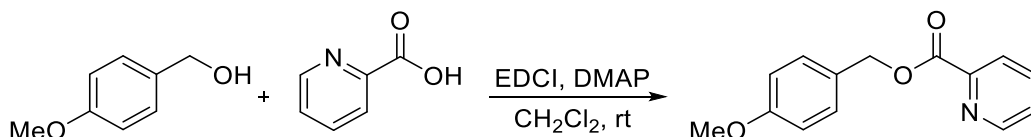

Following the general picolinate ester procedure, 4-methoxybenzyl alcohol (200 mg, 1.449 mmol), picolinic acid (213 mg, 1.739 mmol), EDCI (333 mg, 1.739 mmol) and DMAP (17 mg, 0.144 mmol) were stirred at rt in CH<sub>2</sub>Cl<sub>2</sub> (10 mL) for 16 h. Chromatographic purification of the crude product afforded 4-methoxybenzyl picolinate (302 mg, 86%) as an oil whose spectral data were in agreement with literature values.<sup>2</sup> TLC:  $R_f \approx 0.4$  (50% EtOAc/hexanes).

### 1-Phenylethyl picolinate

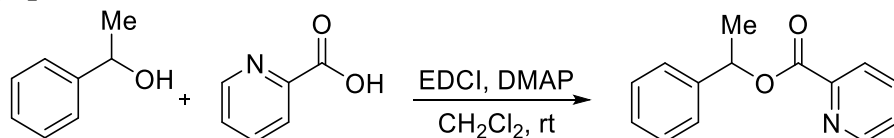

Following the general picolinate ester procedure, 1-phenylethanol (200 mg, 1.638 mmol), picolinic acid (241 mg, 1.966 mmol), EDCI (376 mg, 1.966 mmol) and DMAP (20 mg, 0.163 mmol) were stirred at rt in CH<sub>2</sub>Cl<sub>2</sub> (10 mL) for 16 h. Chromatographic purification of the crude product afforded 1-phenylethyl picolinate (319 mg, 86%) as an oil whose spectral data were in agreement with literature values.<sup>3</sup> TLC:  $R_f \approx 0.5$  (50% EtOAc/hexanes).

### 1-(*o*-Tolyl)ethyl picolinate

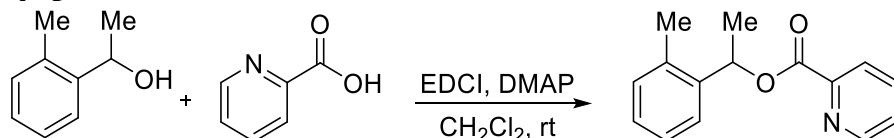

Following the general picolinate ester procedure, 1-(*o*-tolyl)ethanol (200 mg, 1.470 mmol), picolinic acid (217 mg, 1.764 mmol), EDCI (338 mg, 1.764 mmol) and DMAP (17 mg, 0.147 mmol) were stirred at rt in CH<sub>2</sub>Cl<sub>2</sub> (10 mL) for 16 h. Chromatographic purification of the crude product afforded 1-(*o*-tolyl)ethyl picolinate (265 mg, 75%) as an oil. TLC:  $R_f \approx 0.4$  (30% EtOAc/hexanes). <sup>1</sup>H NMR (400 MHz, CDCl<sub>3</sub>)  $\delta$  8.78 (d,  $J = 4.7$  Hz, 1H), 8.10 (d,  $J = 7.8$  Hz, 1H), 7.80 (td,  $J = 7.8, 1.6$  Hz, 1H), 7.57–7.51 (m, 1H), 7.48–7.40 (m, 1H), 7.25–7.10 (m, 3H), 6.38 (q,  $J = 6.6$  Hz, 1H), 2.45 (s, 3H), 1.70 (d,  $J = 6.6$  Hz, 3H); <sup>13</sup>C NMR (101 MHz, CDCl<sub>3</sub>)  $\delta$  164.51, 150.06, 148.38, 139.81, 136.98, 134.96, 130.52, 127.85, 126.86, 126.44, 125.48, 125.22, 71.02, 21.50, 19.23. HRMS (ESI<sup>+</sup>) Calcd. for [C<sub>15</sub>H<sub>15</sub>NO<sub>2</sub>+H]<sup>+</sup> 242.1181, Found 242.1186.

### (*R*)-2-Methoxy-2-oxo-1-phenylethyl picolinate

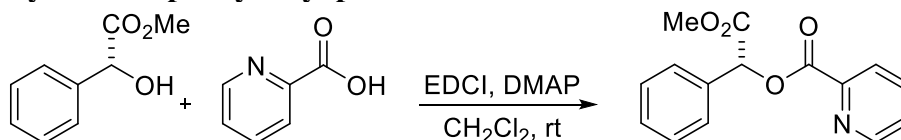

Following the general picolinate ester procedure, methyl (*R*)-2-hydroxy-2-phenylacetate<sup>4</sup> (200 mg, 1.204 mmol), picolinic acid (177 mg, 1.445 mmol), EDCI (277 mg, 1.445 mmol) and DMAP (14 mg, 0.120 mmol) were stirred at rt in CH<sub>2</sub>Cl<sub>2</sub> (10 mL) for 24 h. Chromatographic purification of the crude product afforded (*R*)-2-methoxy-2-oxo-1-phenylethyl picolinate (283 mg, 87%) as an oil. TLC:  $R_f \approx 0.4$  (30% EtOAc/hexanes). <sup>1</sup>H NMR (400 MHz, CDCl<sub>3</sub>)  $\delta$  8.79 (d,  $J = 4.0$  Hz, 1H), 8.19 (d,  $J = 7.8$  Hz, 1H), 7.84 (td,  $J = 7.8, 1.3$  Hz, 1H), 7.59 (dd,  $J = 7.4, 2.3$  Hz, 2H), 7.51–7.46



(m, 1H), 7.46–7.35 (m, 3H), 6.24 (s, 1H), 3.75 (s, 3H);  $^{13}\text{C}$  NMR (101 MHz,  $\text{CDCl}_3$ )  $\delta$  169.08, 164.38, 150.32, 147.34, 137.09, 133.65, 129.52, 129.02, 127.93, 127.32, 125.68, 75.52, 52.89. HRMS ( $\text{ESI}^+$ ) Calcd. for  $[\text{C}_{15}\text{H}_{13}\text{NO}_4+\text{H}]^+$  272.0923, Found 272.0918.

#### Cyano(phenyl)methyl picolinate

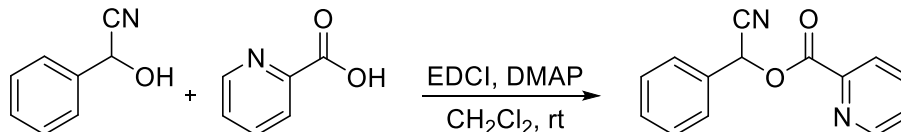

Following the general picolinate ester procedure, cyano(phenyl)methyl alcohol (200 mg, 1.503 mmol), picolinic acid (221 mg, 1.804 mmol), EDCI (345 mg, 1.804 mmol) and DMAP (18 mg, 0.150 mmol) were stirred at rt in  $\text{CH}_2\text{Cl}_2$  (10 mL) for 24 h. Chromatographic purification of the crude product afforded cyano(phenyl)methyl picolinate (249 mg, 70%) as a viscous oil. TLC:  $R_f \approx 0.4$  (50% EtOAc/hexanes).  $^1\text{H}$  NMR (400 MHz,  $\text{CDCl}_3$ )  $\delta$  8.78 (d,  $J = 4.0$  Hz, 1H), 8.15 (d,  $J = 7.8$  Hz, 1H), 7.87 (td,  $J = 7.8, 1.6$  Hz, 1H), 7.69–7.60 (m, 2H), 7.55–7.49 (m, 1H), 7.49–7.38 (m, 3H), 6.74 (s, 1H);  $^{13}\text{C}$  NMR (101 MHz,  $\text{CDCl}_3$ )  $\delta$  163.35, 150.42, 146.37, 137.30, 131.49, 130.66, 129.42, 128.24, 127.85, 126.00, 115.93, 64.13. HRMS ( $\text{ESI}^+$ ) Calcd. for  $[\text{C}_{14}\text{H}_{10}\text{N}_2\text{O}_2+\text{H}]^+$  239.0820, Found 239.0822.

#### Synthesis of 3-(trifluoromethyl)benzyl picolinate

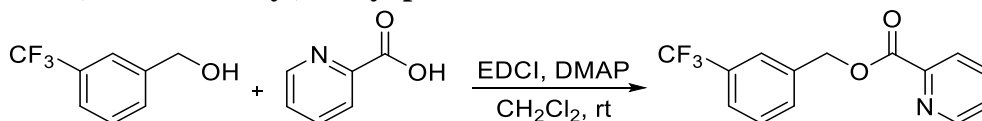

Following the general picolinate ester procedure, 3-(trifluoromethyl)benzyl alcohol (200 mg, 1.136 mmol), picolinic acid (167 mg, 1.363 mmol), EDCI (260 mg, 1.363 mmol) and DMAP (13 mg, 0.113 mmol) were stirred at rt in  $\text{CH}_2\text{Cl}_2$  (10 mL) for 24 h. Chromatographic purification of the crude product afforded 3-(trifluoromethyl)benzyl picolinate (271 mg, 85%) as a solid, mp 61–63 °C. TLC:  $R_f \approx 0.4$  (50% EtOAc/hexanes).  $^1\text{H}$  NMR (400 MHz,  $\text{CDCl}_3$ )  $\delta$  8.77 (d,  $J = 4.7$  Hz, 1H), 8.14 (d,  $J = 7.9$  Hz, 1H), 7.85 (tt,  $J = 7.8, 2.0$  Hz, 1H), 7.74 (s, 1H), 7.68 (d,  $J = 7.6$  Hz, 1H), 7.59 (d,  $J = 7.7$  Hz, 1H), 7.53–7.46 (m, 2H), 5.49 (s, 2H);  $^{13}\text{C}$  NMR (101 MHz,  $\text{CDCl}_3$ )  $\delta$  165.04, 150.14, 147.77, 137.22, 136.67, 132.01, 131.62, 131.30, 130.97, 130.65, 129.29, 128.65, 128.11, 127.29, 125.52, 125.49, 125.45, 125.42, 125.38, 125.35, 122.69, 119.98, 66.74. HRMS ( $\text{ESI}^+$ ) Calcd. for  $[\text{C}_{14}\text{H}_{10}\text{F}_3\text{NO}_2+\text{H}]^+$  282.0742, Found 282.0750.

#### 4-(Methoxycarbonyl)benzyl picolinate

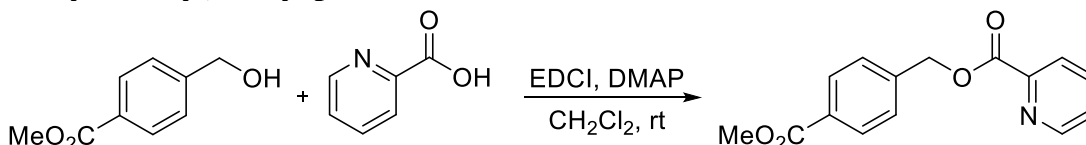

Following the general picolinate ester procedure, 4-(methoxycarbonyl)benzyl alcohol (200 mg, 1.204 mmol), picolinic acid (177 mg, 1.445 mmol), EDCI (277 mg, 1.445 mmol) and DMAP (14 mg, 0.120 mmol) were stirred at rt in  $\text{CH}_2\text{Cl}_2$  (10 mL) for 16 h. Chromatographic purification of the crude product afforded (286 mg, 88%) as a solid, mp 57–59 °C, whose spectral data were in agreement with literature values.<sup>5</sup> TLC:  $R_f \approx 0.4$  (50% EtOAc/hexanes).

#### 4-Bromobenzyl picolinate

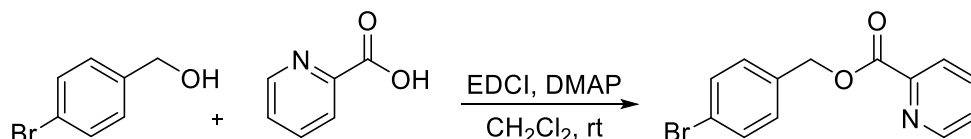

Following the general picolinate ester procedure, 4-bromobenzyl alcohol (200 mg, 1.075 mmol), picolinic acid (158 mg, 1.290 mmol), EDCI (247 mg, 1.290 mmol) and DMAP (13 mg, 0.107 mmol) were stirred at rt in  $\text{CH}_2\text{Cl}_2$  (10 mL) for 16 h. Chromatographic purification of the crude product afforded 4-bromobenzyl picolinate (266 mg, 85%) as a solid, mp 48–50 °C. TLC:  $R_f \approx 0.4$  (50% EtOAc/hexanes).  $^1\text{H}$  NMR (400 MHz,  $\text{CDCl}_3$ )  $\delta$  8.76 (d,  $J = 5.4$  Hz, 1H), 8.13 (d,  $J = 7.8$  Hz, 1H), 7.84 (td,  $J = 7.8, 1.6$  Hz, 1H), 7.54–7.44 (m, 3H), 7.36 (d,  $J = 8.3$  Hz, 2H), 5.40 (s, 2H);  $^{13}\text{C}$  NMR (101 MHz,  $\text{CDCl}_3$ )  $\delta$  164.93, 149.95, 147.75, 137.05, 134.60, 131.75, 130.29, 127.08, 125.32, 122.51, 66.70. HRMS (ESI<sup>+</sup>) Calcd. for  $[\text{C}_{13}\text{H}_{10}\text{BrNO}_2+\text{H}]^+$  291.9973, Found 291.9982.

### 2-Chlorobenzyl picolinate

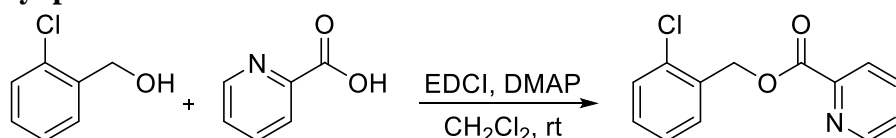

Following the general picolinate ester procedure, 2-chlorobenzyl alcohol (200 mg, 1.408 mmol), picolinic acid (207 mg, 1.690 mmol), EDCI (323 mg, 1.690 mmol) and DMAP (17 mg, 0.140 mmol) were stirred at rt in  $\text{CH}_2\text{Cl}_2$  (10 mL) for 16 h. Chromatographic purification of the crude product afforded 2-chlorobenzyl picolinate (288 mg, 83%) as a solid, mp 50–52 °C, whose spectral data were in agreement with literature values.<sup>6,7</sup> TLC:  $R_f \approx 0.5$  (50% EtOAc/hexanes).

### 3,4-Dichlorobenzyl picolinate

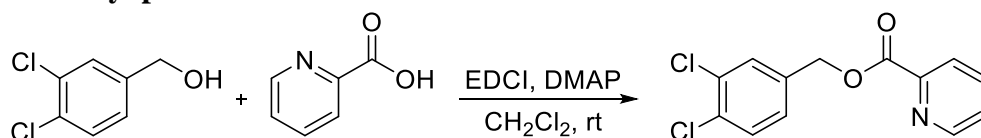

Following the general picolinate ester procedure, 3,4-dichlorobenzyl alcohol (200 mg, 0.961 mmol), picolinic acid (141 mg, 1.153 mmol), EDCI (220 mg, 1.153 mmol) and DMAP (11 mg, 0.096 mmol) were stirred at rt in  $\text{CH}_2\text{Cl}_2$  (10 mL) for 16 h. Chromatographic purification of the crude product afforded 3,4-dichlorobenzyl picolinate (246 mg, 82%) as a solid whose spectral data were in agreement with literature values.<sup>5</sup> TLC:  $R_f \approx 0.5$  (50% EtOAc/hexanes).

### 4-Methoxy-3-nitrobenzyl picolinate

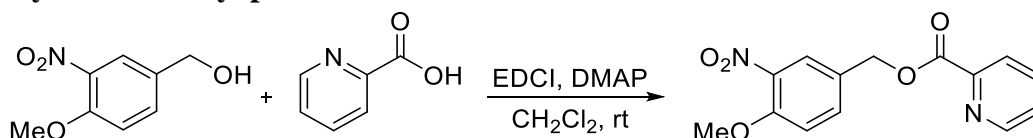

Following the general picolinate ester procedure, (4-methoxy-3-nitrophenyl)methanol (200 mg, 1.092 mmol), picolinic acid (161 mg, 1.311 mmol), EDCI (250 mg, 1.311 mmol) and DMAP (13 mg, 0.109 mmol) were stirred at rt in  $\text{CH}_2\text{Cl}_2$  (10 mL) for 16 h. Chromatographic purification of the crude product afforded 4-methoxy-3-nitrobenzyl picolinate (257 mg, 82% yield) as a solid, mp 119–120 °C. TLC:  $R_f \approx 0.4$  (30% EtOAc/hexanes).  $^1\text{H}$  NMR (400 MHz,  $\text{CDCl}_3$ )  $\delta$  8.76 (d,  $J = 4.1$  Hz, 1H), 8.13 (d,  $J = 7.8$  Hz, 1H), 8.00 (d,  $J = 1.8$  Hz, 1H), 7.85 (t,  $J = 1.4$  Hz, 1H), 7.69 (dd,  $J = 8.6, 2.2$  Hz, 1H), 7.55–7.44 (m, 1H), 7.09 (d,  $J = 8.7$  Hz, 1H), 5.41 (s, 2H), 3.96 (s, 3H);  $^{13}\text{C}$  NMR

(101 MHz, CDCl<sub>3</sub>)  $\delta$  164.93, 153.00, 149.99, 147.57, 139.45, 137.09, 134.81, 128.02, 127.19, 126.33, 125.38, 113.64, 65.90, 56.64. HRMS (ESI<sup>+</sup>) Calcd. for [C<sub>14</sub>H<sub>12</sub>N<sub>2</sub>O<sub>5</sub>+H]<sup>+</sup> 289.0824, Found 289.0819.

### Phenethyl picolinate

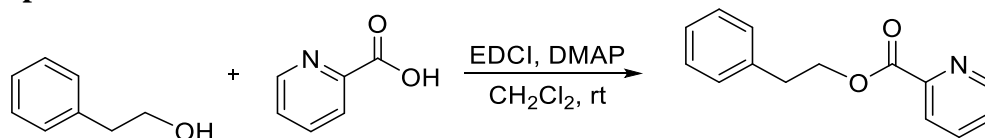

EDCI (943 mg, 4.917 mmol) was added to a 0 °C solution of 2-phenylethanol (0.5 g, 4.098 mmol), and picolinic acid (555 mg, 4.508 mmol) in CH<sub>2</sub>Cl<sub>2</sub> (20 mL) followed by DMAP (50 mg, 0.409 mmol). After stirring at rt for 24 h, the reaction mixture was concentrated in *vacuo*. The residue was purified using a commercial pre-packed SiO<sub>2</sub> (1g column) on a medium pressure, automated chromatograph using 40% EtOAc/hexanes to give phenethyl picolinate as viscous oil (790 mg, 85%) whose spectral data were in agreement with literature values.<sup>8</sup> TLC: R<sub>f</sub>  $\approx$  0.4 (60% EtOAc/hexanes). <sup>1</sup>H NMR (400 MHz, CDCl<sub>3</sub>)  $\delta$  8.81–8.74 (m, 1H), 8.12–8.06 (m, 1H), 7.84 (td, *J* = 7.7, 1.7 Hz, 1H), 7.52–7.45 (m, 1H), 7.36–7.21 (m, 5H), 4.62 (t, *J* = 7.5 Hz, 2H), 3.14 (t, *J* = 7.5 Hz, 2H); <sup>13</sup>C NMR (101 MHz, CDCl<sub>3</sub>)  $\delta$  165.05, 149.92, 148.06, 137.36, 136.99, 128.99, 128.57, 126.88, 126.67, 125.13, 66.34, 35.16.

### (*R*)-1-Ethoxy-1-oxo-4-phenylbutan-2-yl picolinate

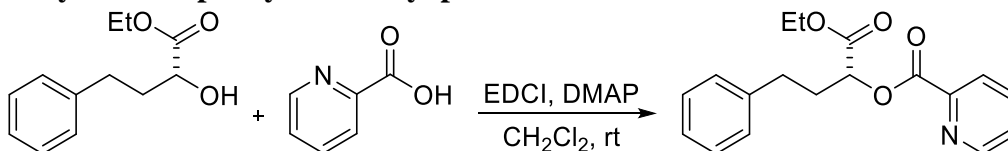

Following the general picolinate ester procedure, ethyl (*R*)-2-hydroxy-4-phenylbutanoate (200 mg, 0.961 mmol), picolinic acid (141 mg, 1.153 mmol), EDCI (200 mg, 1.153 mmol) and DMAP (11 mg, 0.096 mmol) were stirred at rt in CH<sub>2</sub>Cl<sub>2</sub> (10 mL) for 16 h. Chromatographic purification of the crude product afforded (*R*)-1-ethoxy-1-oxo-4-phenylbutan-2-yl picolinate (219 mg, 73%) as an oil. TLC: R<sub>f</sub>  $\approx$  0.4 (50% EtOAc/hexanes). <sup>1</sup>H NMR (400 MHz, CDCl<sub>3</sub>)  $\delta$  8.82–8.87 (m, 1H), 8.11 (d, *J* = 7.8 Hz, 1H), 7.85 (td, *J* = 7.8, 1.7 Hz, 1H), 7.52–7.47 (m, 1H), 7.31–7.24 (m, 2H), 7.23–7.15 (m, 3H), 5.31 (dd, *J* = 8.0, 5.1 Hz, 1H), 4.21 (q, *J* = 7.1 Hz, 2H), 2.89–2.79 (m, 2H), 2.39–2.35 (m, 2H), 1.26 (t, *J* = 7.1 Hz, 3H); <sup>13</sup>C NMR (101 MHz, CDCl<sub>3</sub>)  $\delta$  169.80, 164.61, 150.24, 147.51, 140.45, 137.08, 128.64, 128.57, 127.23, 126.34, 125.57, 72.96, 61.67, 32.76, 31.58, 14.25. HRMS (ESI<sup>+</sup>) Calcd. for [C<sub>18</sub>H<sub>19</sub>NO<sub>4</sub>+H]<sup>+</sup> 314.1392, Found 314.1393.

### (4-Bromonaphthalen-1-yl)methyl picolinate

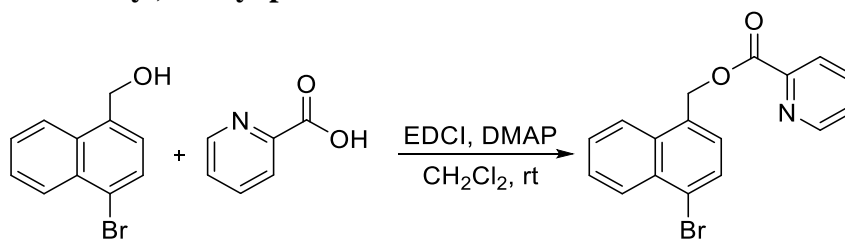

Following the general picolinate ester procedure, (4-bromonaphthalen-1-yl)methanol (200 mg, 0.851 mmol), picolinic acid (125 mg, 1.021 mmol), EDCI (195 mg, 1.021 mmol) and DMAP (10 mg, 0.085 mmol) were stirred at rt in CH<sub>2</sub>Cl<sub>2</sub> (10 mL) for 16 h. Chromatographic purification of

the crude product afforded (4-bromonaphthalen-1-yl)methyl picolinate (220 mg, 76%) as a solid, mp 106-108 °C. TLC:  $R_f \approx 0.4$  (30% EtOAc/hexanes).  $^1\text{H}$  NMR (400 MHz,  $\text{CDCl}_3$ )  $\delta$  8.72–8.69 (m, 1H), 8.30–8.23 (m, 1H), 8.12–8.07 (m, 1H), 8.04 (d,  $J = 7.8$  Hz, 1H), 7.78–7.70 (m, 2H), 7.62–7.54 (m, 2H), 7.49 (d,  $J = 7.6$  Hz, 1H), 7.43–7.37 (m, 1H), 5.83 (s, 2H);  $^{13}\text{C}$  NMR (101 MHz,  $\text{CDCl}_3$ )  $\delta$  164.90, 150.03, 147.74, 136.99, 132.73, 132.09, 131.17, 129.41, 127.99, 127.51, 127.37, 127.02, 125.30, 124.23, 123.95, 65.25. HRMS (ESI<sup>+</sup>) Calcd. for  $[\text{C}_{17}\text{H}_{12}\text{BrNO}_2 + \text{H}]^+$  342.0130, Found 342.0127.

### Naphthalen-2-ylmethyl picolinate

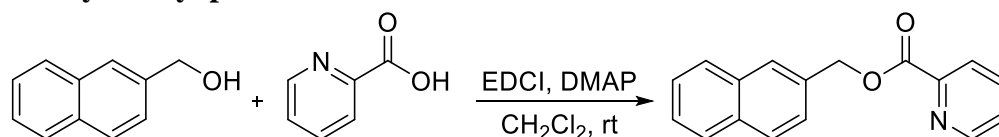

Following the general picolinate ester procedure, naphthalen-2-ylmethyl alcohol (200 mg, 1.265 mmol), picolinic acid (186 mg, 1.518 mmol), EDCI (291 mg, 1.518 mmol) and DMAP (15 mg, 0.126 mmol) were stirred at rt in  $\text{CH}_2\text{Cl}_2$  (10 mL) for 16 h. Chromatographic purification of the crude product afforded naphthalen-2-ylmethyl picolinate (258 mg, 78%) as a solid whose spectral data were in agreement with literature values.<sup>9</sup> TLC:  $R_f \approx 0.5$  (50% EtOAc/hexanes).

### [1,1'-Biphenyl]-2-ylmethyl picolinate

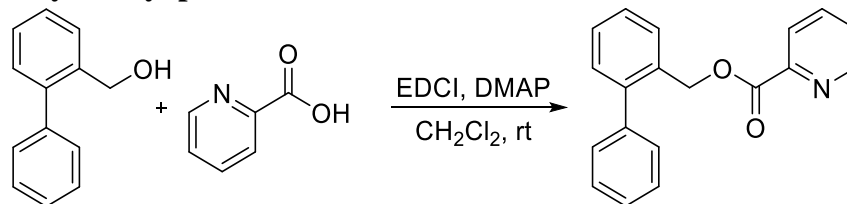

Following the general picolinate ester procedure, [1,1'-biphenyl]-2-ylmethanol (200 mg, 1.086 mmol), picolinic acid (160 mg, 1.304 mmol), EDCI (249 mg, 1.304 mmol) and DMAP (13 mg, 0.108 mmol) were stirred at rt in  $\text{CH}_2\text{Cl}_2$  (10 mL) for 24 h. Chromatographic purification of the crude product afforded [1,1'-biphenyl]-2-ylmethyl picolinate (232 mg, 74%) as an oil. TLC:  $R_f \approx 0.4$  (30% EtOAc/hexanes).  $^1\text{H}$  NMR (400 MHz,  $\text{CDCl}_3$ )  $\delta$  8.76 (d,  $J = 4.7$  Hz, 1H), 8.04 (d,  $J = 7.9$  Hz, 1H), 7.84–7.78 (m, 1H), 7.63–7.56 (m, 1H), 7.49–7.43 (m, 1H), 7.43–7.30 (m, 8H), 5.38 (s, 2H);  $^{13}\text{C}$  NMR (101 MHz,  $\text{CDCl}_3$ )  $\delta$  164.88, 150.14, 148.11, 142.50, 140.48, 137.03, 133.05, 130.32, 129.62, 129.28, 128.49, 128.39, 127.79, 127.48, 126.98, 125.28, 65.72. HRMS (ESI<sup>+</sup>) Calcd. for  $[\text{C}_{19}\text{H}_{15}\text{NO}_2 + \text{H}]^+$  290.1181, Found 290.1188.

### Methyl ((S)-2-((R)-2-hydroxy-2-phenylacetamido)-3,3-dimethylbutanoyl)glycinate

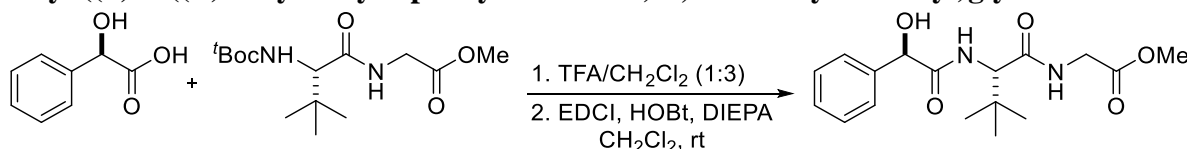

*N*-[(1,1-Dimethylethoxy)carbonyl]-3-methyl-L-valyl-glycine methyl ester<sup>10</sup> (500 mg, 1.655 mmol) in TFA/ $\text{CH}_2\text{Cl}_2$  (5 mL, 1:3) was stirred at 0 °C under argon. After 4 h, the reaction mixture was concentrated in *vacuo*. The crude product (372 mg, 1.177 mmol) was dissolved in  $\text{CH}_2\text{Cl}_2$  (10 mL) and (*R*)-mandelic acid (214 mg, 1.412 mmol), EDCI (247 mg, 1.294 mmol), HOBT (174 mg, 1.294 mmol) and DIEPA (0.6 mL, 3.531) were added sequentially. After stirring at rt for 24 h, water (15 mL) was added and the resulting aqueous layer was separated and extracted with  $\text{CH}_2\text{Cl}_2$

(3 × 20 mL). The combined organic extracts were dried over Na<sub>2</sub>SO<sub>4</sub>, filtered and concentrated in *vacuo*. The residue was purified using a commercial, pre-packed SiO<sub>2</sub> column on a medium pressure, automated chromatograph using 60% EtOAc/hexanes to furnish the title amide (416 mg, 68%) as a solid, mp 73–75 °C. TLC: R<sub>f</sub> ≈ 0.5 (70% EtOAc/hexanes). <sup>1</sup>H NMR (400 MHz, CDCl<sub>3</sub>) δ 7.36–7.28 (m, 4H), 7.12 (d, *J* = 9.6 Hz, 1H), 5.05 (s, 1H), 4.48 (d, *J* = 9.7 Hz, 1H), 4.35 (br s, 1H), 3.94 (dd, *J* = 18.0, 6.1 Hz, 1H), 3.69 (s, 3H), 3.47 (dd, *J* = 18.0, 4.3 Hz, 1H), 0.90 (s, 9H); <sup>13</sup>C NMR (101 MHz, CDCl<sub>3</sub>) δ 172.17, 170.56, 169.99, 139.70, 128.73, 128.55, 126.90, 74.20, 60.14, 52.23, 40.82, 35.07, 26.34. HRMS (ESI<sup>+</sup>) Calcd. for [C<sub>17</sub>H<sub>24</sub>N<sub>2</sub>O<sub>5</sub>+H]<sup>+</sup> 337.1763, Found 337.1768.

**(*R*)-2-(*S*)-1-(2-methoxy-2-oxoethyl)amino)-3,3-dimethyl-1-oxobutan-2-yl)amino)-2-oxo-1-phenylethyl picolinate**

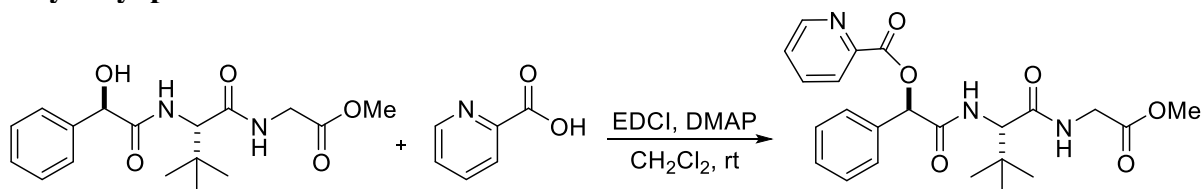

Following the general picolinate ester procedure, methyl (*S*)-2-(*R*)-2-hydroxy-2-phenylacetamido)-3,3-dimethylbutanoyl)glycinate (200 mg, 0.595 mmol), picolinic acid (87 mg, 0.714 mmol), EDCI (136 mg, 0.714 mmol) and DMAP (7 mg, 0.059 mmol) were stirred at rt in CH<sub>2</sub>Cl<sub>2</sub> (10 mL) for 18 h. Chromatographic purification of the crude product afforded (*R*)-2-(*S*)-1-((2-methoxy-2-oxoethyl)amino)-3,3-dimethyl-1-oxobutan-2-yl)amino)-2-oxo-1-phenylethyl picolinate (225 mg, 86%) as a viscous oil. TLC: R<sub>f</sub> ≈ 0.4 (30% EtOAc/hexanes). <sup>1</sup>H NMR (400 MHz, CDCl<sub>3</sub>) δ 8.73 (d, *J* = 4.4 Hz, 1H), 8.08 (d, *J* = 7.8 Hz, 1H), 7.80 (td, *J* = 7.8, 1.7 Hz, 1H), 7.59–7.41 (m, 4H), 7.31–7.28 (m, 2H), 6.33 (s, 1H), 4.58 (d, *J* = 9.5 Hz, 1H), 3.94 (dd, *J* = 17.7, 6.2 Hz, 1H), 3.64 (s, 3H), 3.36 (dd, *J* = 17.7, 5.0 Hz, 1H), 3.07 (brs, 1H), 0.93 (s, 9H); <sup>13</sup>C NMR (101 MHz, CDCl<sub>3</sub>) δ 170.53, 169.99, 168.37, 163.68, 150.19, 147.20, 137.16, 135.24, 129.22, 128.83, 127.96, 127.42, 125.29, 76.31, 60.02, 52.04, 40.85, 35.07, 26.43. HRMS (ESI<sup>+</sup>) Calcd. for [C<sub>23</sub>H<sub>27</sub>N<sub>3</sub>O<sub>6</sub>+H]<sup>+</sup> 442.1978, Found 442.1975.

**1-(*p*-Tolyl)but-3-en-1-ol**

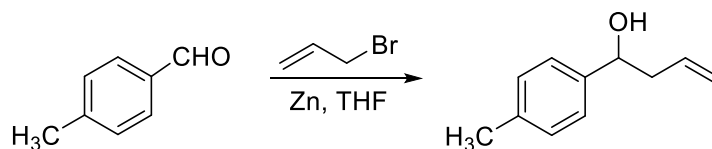

Allyl bromide (2.15 mL, 24.968 mmol) was added dropwise to a 0 °C solution of zinc powder (1.08 g, 16.645 mmol) in dry THF (20 mL). After stirring for 15 min at 0 °C, a solution of *p*-tolualdehyde (1.0 g, 8.322 mmol) in dry THF (5 mL) was added and then the reaction mixture was warmed to rt. After 25 h, the reaction mixture was filtered through a diatomaceous earth pad and the filter cake was washed with EtOAc (20 mL). The combined filtrates were concentrated in *vacuo* and the residue was purified on a commercial pre-packed SiO<sub>2</sub> column using a medium pressure, automated chromatograph using 10% EtOAc/hexanes to give 1-(*p*-tolyl)but-3-en-1-ol as a viscous oil (1.2 g, 89%) whose spectral data were in agreement with literature values.<sup>11</sup> TLC: R<sub>f</sub> ≈ 0.4 (20% EtOAc/hexanes). <sup>1</sup>H NMR (500 MHz, CDCl<sub>3</sub>) δ 7.28 (d, *J* = 7.3 Hz, 2H), 7.20 (d, *J* = 7.5 Hz, 2H), 5.91–5.77 (m, 1H), 5.24–5.12 (m, 2H), 4.74 (dd, *J* = 7.5, 5.5 Hz, 1H), 2.59–2.49 (m, 2H), 2.38 (s, 3H).

#### ***tert*-Butyldimethyl ((1-(*p*-tolyl)but-3-en-1-yl)oxy)silane**

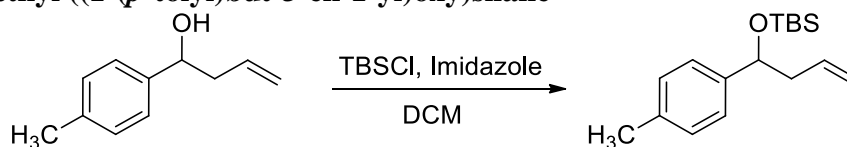

*tert*-Butyldimethylchlorosilane (TBSCl) (1.34 g, 8.888 mmol) was added portion wise to a stirring, rt solution of 1-(*p*-tolyl)but-3-en-1-ol (1.2 g, 7.407 mmol) and imidazole (755 mg, 11.111 mmol) in dry CH<sub>2</sub>Cl<sub>2</sub> (35 mL). After 20 h, water (20 mL) was added and the layers were separated. The aqueous layer was extracted with CH<sub>2</sub>Cl<sub>2</sub> (3 × 15 mL). The extracts and organic layer were combined, washed with brine (15 mL), dried with Na<sub>2</sub>SO<sub>4</sub>, and concentrated in *vacuo*. The residue was purified using a commercial pre-packed SiO<sub>2</sub> column on a medium pressure, automated chromatograph using 5% EtOAc/hexanes to obtain *tert*-butyldimethyl ((1-(*p*-tolyl)but-3-en-1-yl)oxy)silane as a colorless oil (1.8 g, 89%). TLC: R<sub>f</sub> ≈ 0.6 (10% EtOAc/hexanes). <sup>1</sup>H NMR (400 MHz, CDCl<sub>3</sub>) δ 7.18 (d, *J* = 7.9 Hz, 2H), 7.11 (d, *J* = 7.9 Hz, 2H), 5.86–5.69 (m, 1H), 5.05–4.97 (m, 2H), 4.64 (dd, *J* = 7.3, 5.2 Hz, 1H), 2.53–2.28 (m, 5H), 0.87 (s, 9H), 0.02 (s, 3H), -0.13 (s, 3H); <sup>13</sup>C NMR (101 MHz, CDCl<sub>3</sub>) δ 142.15, 136.37, 135.43, 128.64, 125.76, 116.70, 74.80, 45.57, 25.83, 21.13, 18.25, -4.62, -4.92. HRMS (ESI<sup>+</sup>) Calcd. for [C<sub>17</sub>H<sub>28</sub>OSi]<sup>+</sup> 276.1909, Found 276.1900.

#### **4-(*tert*-Butyldimethylsilyl)oxy)-4-(*p*-tolyl)butan-1-ol**

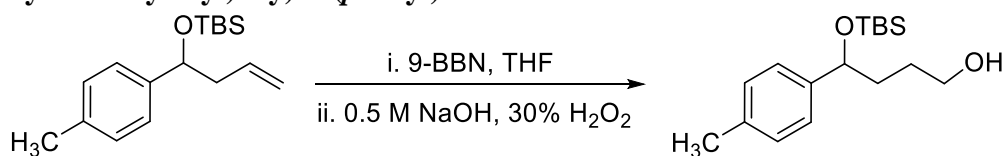

A solution of 9-BBN (14.2 mL, 7.174 mmol, 0.5 M in THF) was added to a 0 °C solution of the above *tert*-butyldimethyl ((1-(*p*-tolyl)but-3-en-1-yl)oxy)silane (1.8 g, 6.522 mmol) in dry THF (30 mL) at 0 °C and then stirred at room temperature. After 18 h, 0.5 M aq. NaOH (12 mL) and 30% H<sub>2</sub>O<sub>2</sub> (12 mL) were added sequentially. After 4 h, the reaction mixture was diluted with EtOAc (15 mL), the organic phase was separated, and the aq. phase was extracted with EtOAc (3 × 15 mL). The extracts and the organic layer were combined, dried over anhydrous Na<sub>2</sub>SO<sub>4</sub>, filtered, and concentrated. The residue was purified using a commercial pre-packed SiO<sub>2</sub> column on a medium pressure, automated chromatograph using 25% EtOAc/hexanes to obtain 4-(*tert*-butyldimethylsilyl)oxy)-4-(*p*-tolyl)butan-1-ol as a viscous oil (1 g, 55%). TLC: R<sub>f</sub> ≈ 0.5 (40% EtOAc/hexanes). <sup>1</sup>H NMR (400 MHz, CDCl<sub>3</sub>) δ 7.17 (d, *J* = 7.8 Hz, 2H), 7.10 (d, *J* = 7.8 Hz, 2H), 4.75–4.65 (m, 1H), 3.68–3.54 (m, 2H), 2.33 (s, 3H), 1.83–1.68 (m, 2H), 1.66–1.54 (m, 3H), 0.89 (s, 9H), 0.02 (s, 3H), -0.13 (s, 3H); <sup>13</sup>C NMR (101 MHz, CDCl<sub>3</sub>) δ 142.11, 136.37, 128.69, 125.74, 74.61, 63.05, 37.22, 28.60, 25.85, 21.11, 18.23, -4.62, -5.01. HRMS (ESI<sup>+</sup>) Calcd. for [C<sub>17</sub>H<sub>30</sub>O<sub>2</sub>Si]<sup>+</sup> 294.2015, Found 294.2015.

#### **4-(*tert*-Butyldimethylsilyl)oxy)-4-(*p*-tolyl)butyl pyrazine-2-carboxylate**

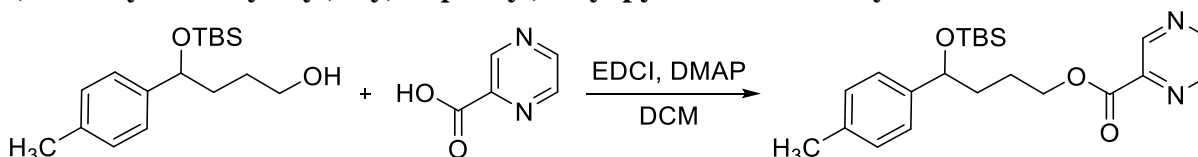

EDCI (1.02 g, 5.357 mmol) was added to a 0 °C solution of 4-(*tert*-butyldimethylsilyl)oxy)-4-(*p*-tolyl)butan-1-ol (1 g, 3.571 mmol), and pyrazine-2-carboxylic acid (658 mg, 5.357 mmol) in

CH<sub>2</sub>Cl<sub>2</sub> (30 mL) followed by DMAP (43 mg, 0.357 mmol). After stirring at rt for 18 h, the reaction mixture was concentrated in *vacuo*. The residue was purified using a commercial pre-packed SiO<sub>2</sub> column on a medium pressure, automated chromatograph using 40% EtOAc/hexanes to give 4-((*tert*-butyldimethylsilyl)oxy)-4-(*p*-tolyl)butyl pyrazine-2-carboxylate as a viscous oil (1.1 g, 82%). TLC: *R*<sub>f</sub> ≈ 0.4 (60% EtOAc/hexanes). <sup>1</sup>H NMR (400 MHz, CDCl<sub>3</sub>) δ 9.27 (d, *J* = 1.4 Hz, 1H), 8.75 (d, *J* = 2.4 Hz, 1H), 8.72 (dd, *J* = 2.4, 1.4 Hz, 1H), 7.18 (d, *J* = 7.9 Hz, 2H), 7.10 (d, *J* = 7.9 Hz, 2H), 4.70 (t, *J* = 5.4 Hz, 1H), 4.48–4.38 (m, 2H), 2.32 (s, 3H), 1.91–1.74 (m, 4H), 0.88 (s, 9H), 0.02 (s, 3H), -0.15 (s, 3H); <sup>13</sup>C NMR (101 MHz, CDCl<sub>3</sub>) δ 163.87, 147.53, 146.23, 144.43, 143.55, 142.00, 136.54, 128.76, 125.71, 74.20, 36.99, 25.83, 24.67, 21.11, 18.19, -4.61, -4.99. HRMS (ESI<sup>+</sup>) Calcd. for [C<sub>22</sub>H<sub>32</sub>N<sub>2</sub>O<sub>3</sub>Si+H]<sup>+</sup> 401.2260, Found 401.2199.

#### 4-Hydroxy-4-(*p*-tolyl)butyl pyrazine-2-carboxylate

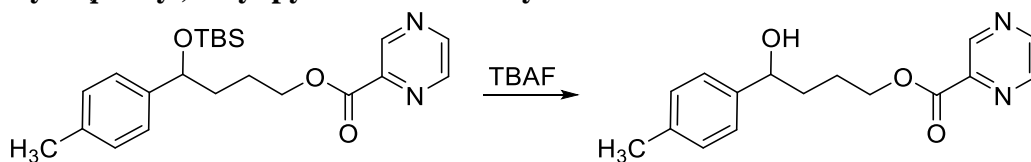

To a solution of 4-((*tert*-butyldimethylsilyl)oxy)-4-(*p*-tolyl)butyl pyrazine-2-carboxylate (800 mg, 2.072 mmol) in THF (20 mL) cooled to 0 °C was added TBAF (2.5 mL, 2.487 mmol, 1.0 M in THF). After stirring for 3 h at rt, the mixture was diluted with saturated aqueous NH<sub>4</sub>Cl (10 mL). Two layers were separated and the aqueous layer was extracted with EtOAc (3 × 15 mL). The combined organic layer and organic extracts were dried over anhydrous Na<sub>2</sub>SO<sub>4</sub>, filtered, and concentrated. The residue was purified using a commercial pre-packed SiO<sub>2</sub> column on a medium pressure, automated chromatograph using 60% EtOAc/hexanes to give 4-hydroxy-4-(*p*-tolyl)butyl pyrazine-2-carboxylate as a viscous oil (450 mg, 80%). TLC: *R*<sub>f</sub> ≈ 0.4 (70% EtOAc/hexanes). <sup>1</sup>H NMR (400 MHz, CDCl<sub>3</sub>) δ 9.27 (d, *J* = 1.3 Hz, 1H), 8.74 (d, *J* = 2.4 Hz, 1H), 8.69 (dd, *J* = 2.6, 1.3 Hz, 1H), 7.23 (d, *J* = 7.9 Hz, 2H), 7.14 (d, *J* = 7.8 Hz, 2H), 4.71 (t, *J* = 6.0 Hz, 1H), 4.53–4.38 (m, 2H), 2.33 (s, 3H), 2.21 (br s, 1H), 1.99–1.82 (m, 4H); <sup>13</sup>C NMR (101 MHz, CDCl<sub>3</sub>) δ 163.86, 147.59, 146.21, 144.41, 143.44, 141.36, 137.42, 129.21, 125.77, 73.81, 66.23, 35.20, 25.08, 21.10. HRMS (ESI<sup>+</sup>) Calcd. for [C<sub>16</sub>H<sub>18</sub>N<sub>2</sub>O<sub>3</sub>+H]<sup>+</sup> 287.1396, Found 287.1393.

#### Synthesis of 4-(picolinoyloxy)4-(*p*-tolyl)butyl pyrazine-2-carboxylate

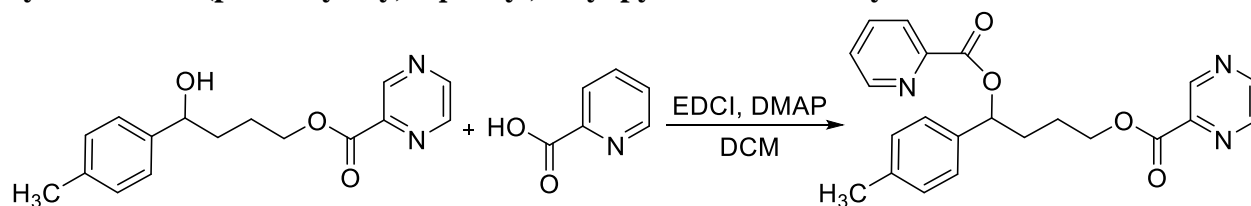

EDCI (317 mg, 1.654 mmol) was added to a 0 °C solution of 4-hydroxy-4-(*p*-tolyl)butyl pyrazine-2-carboxylate (0.3 g, 1.103 mmol) and picolinic acid (202 mg, 1.654 mmol) in CH<sub>2</sub>Cl<sub>2</sub> (15 mL) followed by DMAP (13 mg, 0.111 mmol). After stirring at rt for 14 h, the reaction mixture was concentrated in *vacuo*. The residue was purified using a commercial pre-packed SiO<sub>2</sub> column on a medium pressure, automated chromatograph using 80% EtOAc/hexanes to give 4-(picolinoyloxy)4-(*p*-tolyl)butyl pyrazine-2-carboxylate as a viscous oil (260 mg, 62%). TLC: *R*<sub>f</sub> ≈ 0.4 (100% EtOAc). <sup>1</sup>H NMR (400 MHz, CDCl<sub>3</sub>) δ 9.27 (s, 1H), 8.81–8.64 (m, 3H), 8.09 (d, *J* = 7.8 Hz, 1H), 7.80 (td, *J* = 7.8, 1.8 Hz, 1H), 7.48–7.41 (m, 1H), 7.36 (d, *J* = 7.8 Hz, 2H), 7.15 (d, *J* = 7.8 Hz, 2H), 6.09 (t, *J* = 6.9 Hz, 1H), 4.47 (td, *J* = 6.7, 2.2 Hz, 2H), 2.31 (s, 4H), 2.17–2.08 (m,

1H), 2.04–1.94 (m, 1H), 1.90–1.83 (m, 1H);  $^{13}\text{C}$  NMR (101 MHz,  $\text{CDCl}_3$ )  $\delta$  164.46, 163.83, 149.96, 148.14, 147.63, 146.25, 144.43, 143.36, 138.07, 136.89, 136.68, 129.28, 126.84, 126.65, 125.22, 76.92, 65.78, 32.56, 25.00, 21.16. HRMS (ESI $^+$ ) Calcd. for  $[\text{C}_{22}\text{H}_{21}\text{N}_4\text{O}_4+\text{H}]^+$  392.1610, Found 392.1614.

### Synthesis of 3,5-dimethylbenzyl picolinate

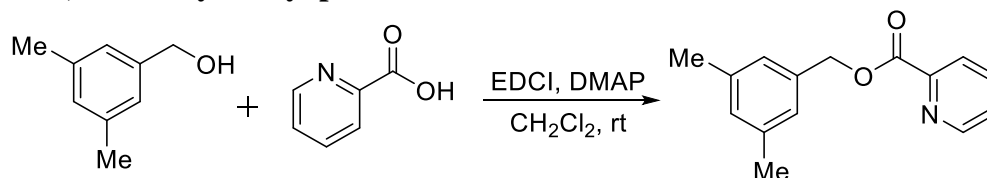

Following the general picolinate ester procedure, (3,5-dimethylphenyl)methanol (250 mg, 1.835 mmol), picolinic acid (271 mg, 2.205 mmol), EDCI (422 mg, 2.205 mmol) and DMAP (22 mg, 0.183 mmol) were stirred at rt in  $\text{CH}_2\text{Cl}_2$  (10 mL) for 16 h. Chromatographic purification of the crude product afforded 3,5-dimethylbenzyl picolinate (390 mg, 88%) as a viscous oil. TLC:  $R_f \approx 0.5$  (50% EtOAc/hexanes).  $^1\text{H}$  NMR (400 MHz,  $\text{CDCl}_3$ )  $\delta$  8.77 (d,  $J = 4.7$  Hz, 1H), 8.14 (d,  $J = 7.7$  Hz, 1H), 7.83 (td,  $J = 7.7, 1.8$  Hz, 1H), 7.50–7.43 (m, 1H), 7.10 (s, 2H), 6.97 (s, 1H), 5.39 (s, 2H), 2.32 (s, 6H);  $^{13}\text{C}$  NMR (101 MHz,  $\text{CDCl}_3$ )  $\delta$  165.03, 149.92, 148.06, 138.17, 136.96, 135.38, 130.06, 126.87, 126.47, 125.27, 67.65, 21.22.

### General Procedure: Amination of Picolinate Esters

To a stirring, 0  $^\circ\text{C}$  solution of HOSA (0.4 mmol, 2 equiv) in 1,1,1,3,3,3-hexafluoroisopropanol (2 mL) was added  $\text{Et}_3\text{N}$  (0.4 mmol, 2 equiv) under an argon atmosphere. After 15 min, the picolinate ester (0.2 mmol, 1 equiv) and anhydrous  $\text{FeCl}_3$  (5 mol%; n.b., deliquescent) were added sequentially while maintaining an inert atmosphere. After complete consumption of the picolinate ester (6–24 h, monitored by TLC), the reaction mixture was diluted with  $\text{CH}_2\text{Cl}_2$  (10 mL), washed with saturated aqueous  $\text{Na}_2\text{CO}_3$  (10 mL), brine (10 mL), dried over anhydrous  $\text{Na}_2\text{SO}_4$ , and concentrated *in vacuo*. The crude residue was purified on a commercial pre-packed  $\text{SiO}_2$  column using a medium pressure, automated chromatograph equipped with a UV detector and eluted with MeOH/ $\text{CH}_2\text{Cl}_2$  or EtOAc/hexanes to furnish aminated picolinate(s) in the indicated yield (Table 2). Variations in reaction conditions are noted in the legend of Table 2 for select substrates.

### 3-Aminobenzyl picolinate (2)

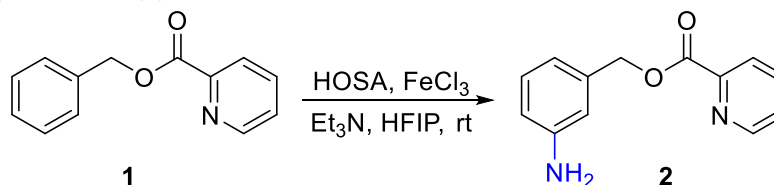

Following the general amination procedure, benzyl picolinate (**1**) (50 mg, 0.234 mmol),  $\text{FeCl}_3$  (1.8 mg, 0.011 mmol),  $\text{Et}_3\text{N}$  (65  $\mu\text{L}$ , 0.469 mmol), and HOSA (53 mg, 0.469 mmol) were stirred at rt in HFIP (2.3 mL) for 10 h. Chromatographic purification of the crude product afforded 3-aminobenzyl picolinate (**2**) (33 mg, 72%) as an oil. TLC:  $R_f \approx 0.4$  (70% EtOAc/hexanes).  $^1\text{H}$  NMR (400 MHz,  $\text{CDCl}_3$ )  $\delta$  8.75 (d,  $J = 4.7$  Hz, 1H), 8.12 (dt,  $J = 7.9, 1.0$  Hz, 1H), 7.81 (td,  $J = 7.7, 1.8$  Hz, 1H), 7.48–7.42 (m, 1H), 7.13 (t,  $J = 7.8$  Hz, 1H), 6.84 (d,  $J = 7.6$  Hz, 1H), 6.79 (t,  $J = 1.9$  Hz, 1H), 6.63 (dd,  $J = 7.9, 1.7$  Hz, 1H), 5.35 (s, 2H), 3.71 (br s, 2H);  $^{13}\text{C}$  NMR (101 MHz,  $\text{CDCl}_3$ )  $\delta$



165.10, 150.01, 148.11, 146.78, 137.07, 136.82, 129.61, 127.01, 125.37, 118.66, 115.17, 115.07, 67.63. HRMS (ESI<sup>+</sup>) Calcd. for [C<sub>13</sub>H<sub>12</sub>N<sub>2</sub>O<sub>2</sub>+H]<sup>+</sup> 229.0971, Found 229.0982.

**5 mmol scale: 1** (1.1 g, 5.164 mmol), FeCl<sub>3</sub> (41.8 mg, 0.2582 mmol), Et<sub>3</sub>N (1.43 mL, 10.328 mmol), and HOSA (1.16 g, 10.328 mmol) were stirred at rt in HFIP (50 mL) for 15 h. The residue was purified using a commercial pre-packed SiO<sub>2</sub> column on a medium pressure, automated chromatograph using a gradient of 1-3% MeOH/CH<sub>2</sub>Cl<sub>2</sub> to obtain 3-aminobenzyl picolinate (**2**) (763 mg, 65%) as an oil and unreacted **1** (55 mg, 5%) as an oil.

### Hydrolysis of **2** to 3-Aminobenzyl alcohol

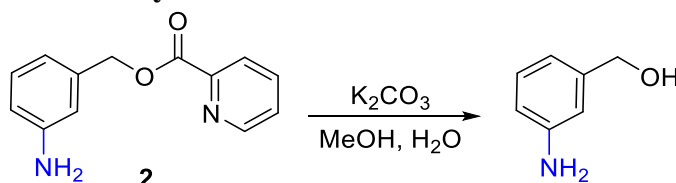

K<sub>2</sub>CO<sub>3</sub> (121 mg, 0.877 mmol) was added portionwise to a 0 °C solution of 3-aminobenzyl picolinate (**2**) (100 mg, 0.438 mmol) in MeOH/H<sub>2</sub>O (10:1, 6.6 mL). After stirring at rt for 21 h, the reaction mixture was concentrated in *vacuo* and the residue was diluted with H<sub>2</sub>O (5 mL) and EtOAc (5 mL). The layers were separated and the aqueous layer was extracted with EtOAc (3 × 5 mL). The organic layer and the organic extracts were combined, dried over anhydrous Na<sub>2</sub>SO<sub>4</sub>, filtered, and concentrated. The residue was purified using a commercial pre-packed SiO<sub>2</sub> column on a medium pressure, automated chromatograph using 3% MeOH/CH<sub>2</sub>Cl<sub>2</sub> to give 3-aminobenzyl alcohol as a white solid (43 mg, 81%) whose spectral data were in agreement with literature values.<sup>12</sup> TLC: R<sub>f</sub> ≈ 0.4 (70% EtOAc/hexanes). <sup>1</sup>H NMR (400 MHz, DMSO-*d*<sub>6</sub>) δ 6.95 (t, *J* = 7.7 Hz, 1H), 6.56 (t, *J* = 1.9 Hz, 1H), 6.50–6.37 (m, 2H), 5.05–4.91 (m, 3H), 4.35 (d, *J* = 5.7 Hz, 2H); <sup>13</sup>C NMR (101 MHz, DMSO-*d*<sub>6</sub>) δ 148.47, 143.17, 128.54, 114.08, 112.39, 112.15, 63.29.

### 3-Amino-4-methylbenzyl picolinate (**3**)

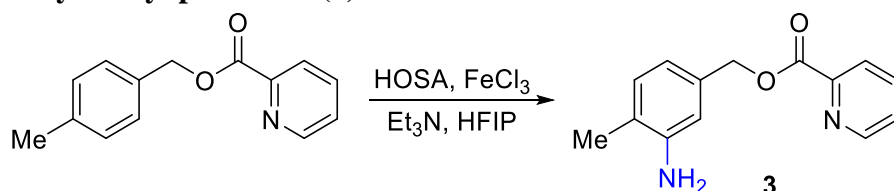

Following the general amination procedure, 4-methylbenzyl picolinate (50 mg, 0.220 mmol), FeCl<sub>3</sub> (1.7 mg, 0.011 mmol), Et<sub>3</sub>N (61 μL, 0.440 mmol), and HOSA (49 mg, 0.440 mmol) were stirred at rt in HFIP (2.2 mL) for 16 h. Chromatographic purification of the crude product afforded 3-amino-4-methylbenzyl picolinate (**3**) (37 mg, 70%) as an oil. TLC: R<sub>f</sub> ≈ 0.4 (50% EtOAc/hexanes). <sup>1</sup>H NMR (400 MHz, CDCl<sub>3</sub>) δ 8.75 (d, *J* = 4.7 Hz, 1H), 8.11 (d, *J* = 7.8 Hz, 1H), 7.81 (td, *J* = 7.8, 1.8 Hz, 1H), 7.48–7.42 (m, 1H), 7.03 (d, *J* = 7.5 Hz, 1H), 6.81 (d, *J* = 6.8 Hz, 2H), 5.34 (s, 2H), 3.64 (s, 2H), 2.14 (s, 3H); <sup>13</sup>C NMR (101 MHz, CDCl<sub>3</sub>) δ 165.15, 150.01, 148.22, 144.84, 137.04, 134.49, 130.69, 126.97, 125.36, 122.69, 118.97, 115.15, 67.70, 17.28. HRMS (ESI<sup>+</sup>) Calcd. for [C<sub>14</sub>H<sub>14</sub>N<sub>2</sub>O<sub>2</sub>+H]<sup>+</sup> 243.1128, Found 243.1128.

### 5-Amino-2-methylbenzyl picolinate (**4a**) and 3-amino-2-methylbenzyl picolinate (**4b**)

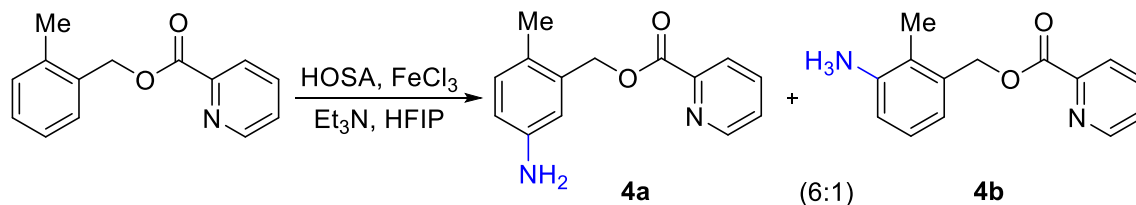

Following the general amination procedure, 2-methylbenzyl picolinate (50 mg, 0.220 mmol),  $\text{FeCl}_3$  (1.7 mg, 0.011 mmol),  $\text{Et}_3\text{N}$  (61  $\mu\text{L}$ , 0.440 mmol), and HOSA (49 mg, 0.440 mmol) were stirred at rt in HFIP (2.2 mL) for 16 h. Chromatographic purification of the crude product afforded 5-amino-2-methylbenzyl picolinate (**4a**) (34 mg) as an oil and 3-amino-2-methylbenzyl picolinate (**4b**) (5 mg) as an oil for a 75% combined yield.

**5-Amino-2-methylbenzyl picolinate (4a):** TLC:  $R_f \approx 0.5$  (70% EtOAc/hexanes);  $^1\text{H}$  NMR (400 MHz,  $\text{CDCl}_3$ )  $\delta$  8.76 (d,  $J = 4.3$  Hz, 1H), 8.10 (d,  $J = 7.8$  Hz, 1H), 7.81 (td,  $J = 7.7, 1.7$  Hz, 1H), 7.49–7.41 (m, 1H), 6.97 (d,  $J = 8.0$  Hz, 1H), 6.79 (d,  $J = 2.6$  Hz, 1H), 6.58 (dd,  $J = 8.1, 2.5$  Hz, 1H), 5.36 (s, 2H), 3.60 (br s, 2H), 2.28 (s, 3H);  $^{13}\text{C}$  NMR (101 MHz,  $\text{CDCl}_3$ )  $\delta$  165.04, 150.07, 148.10, 144.57, 137.05, 134.35, 131.25, 126.98, 126.65, 125.30, 116.36, 115.36, 65.98, 18.17. HRMS (ESI $^+$ ) Calcd. for  $[\text{C}_{14}\text{H}_{14}\text{N}_2\text{O}_2+\text{H}]^+$  243.1128, Found 243.1128.

**3-Amino-2-methylbenzyl picolinate (4b):** TLC:  $R_f \approx 0.4$  (70% EtOAc/hexanes);  $^1\text{H}$  NMR (400 MHz,  $\text{CDCl}_3$ )  $\delta$  8.77 (d,  $J = 4.3$  Hz, 1H), 8.11 (d,  $J = 7.8$  Hz, 1H), 7.82 (td,  $J = 7.8, 1.8$  Hz, 1H), 7.49–7.49 (m, 1H), 7.04 (t,  $J = 7.7$  Hz, 1H), 6.91 (d,  $J = 7.4$  Hz, 1H), 6.71 (d,  $J = 7.9$  Hz, 1H), 5.45 (s, 2H), 3.68 (br s, 2H), 2.20 (s, 3H);  $^{13}\text{C}$  NMR (101 MHz,  $\text{CDCl}_3$ )  $\delta$  165.07, 150.16, 148.20, 145.14, 137.07, 134.28, 126.99, 126.59, 125.35, 121.64, 120.75, 116.01, 66.75, 12.77. HRMS (ESI $^+$ ) Calcd. for  $[\text{C}_{14}\text{H}_{14}\text{N}_2\text{O}_2+\text{H}]^+$  243.1128, Found 243.1132.

### 3-Amino-2,6-dimethylbenzyl picolinate (5)

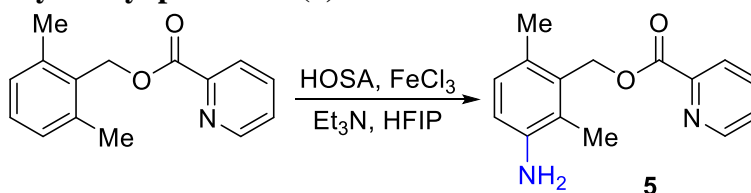

Following the general amination procedure, 2,6-dimethylbenzyl picolinate (50 mg, 0.207 mmol),  $\text{FeCl}_3$  (1.6 mg, 0.010 mmol),  $\text{Et}_3\text{N}$  (57  $\mu\text{L}$ , 0.414 mmol), and HOSA (46 mg, 0.414 mmol) were stirred at rt in HFIP (2 mL) for 16 h. Chromatographic purification of the crude product afforded 3-amino-2,6-dimethylbenzyl picolinate (**5**) (41 mg, 78%) as an oil. TLC:  $R_f \approx 0.4$  (50% EtOAc/hexanes).  $^1\text{H}$  NMR (400 MHz,  $\text{CDCl}_3$ )  $\delta$  8.74 (d,  $J = 4.7$  Hz, 1H), 8.04 (d,  $J = 7.9$  Hz, 1H), 7.77 (tt,  $J = 7.8, 1.9$  Hz, 1H), 7.46–7.39 (m, 1H), 6.88 (d,  $J = 7.9$  Hz, 1H), 6.63 (d,  $J = 8.0$  Hz, 1H), 5.49 (s, 2H), 3.53 (br s, 2H), 2.35 (s, 3H), 2.21 (s, 3H);  $^{13}\text{C}$  NMR (101 MHz,  $\text{CDCl}_3$ )  $\delta$  165.14, 150.07, 148.05, 143.07, 136.94, 131.94, 128.48, 128.40, 126.84, 125.20, 123.29, 116.09, 62.91, 19.46, 13.23. HRMS (ESI $^+$ ) Calcd. for  $[\text{C}_{15}\text{H}_{16}\text{N}_2\text{O}_2+\text{H}]^+$  257.1284, Found 257.1283.

### 3-Amino-4-methoxybenzyl picolinate (6)

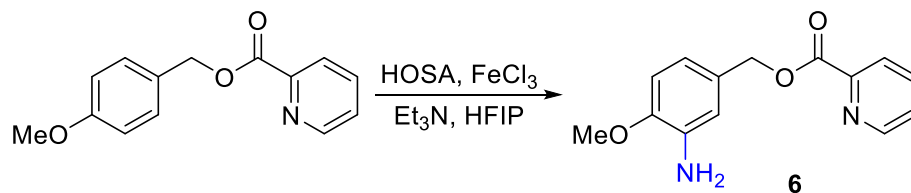

Following the general amination procedure, 4-methoxybenzyl picolinate (50 mg, 0.205 mmol), FeCl<sub>3</sub> (1.6 mg, 0.010 mmol), Et<sub>3</sub>N (57  $\mu$ L, 0.411 mmol), and HOSA (46 mg, 0.411 mmol) were stirred at rt in HFIP (2 mL) for 6 h. Chromatographic purification of the crude product afforded 3-amino-4-methoxybenzyl picolinate (**6**) (37 mg, 71%) as an oil. TLC:  $R_f \approx 0.4$  (70% EtOAc/hexanes). <sup>1</sup>H NMR (400 MHz, CDCl<sub>3</sub>)  $\delta$  8.74 (d,  $J$  = 4.6 Hz, 1H), 8.10 (d,  $J$  = 7.8 Hz, 1H), 7.80 (td,  $J$  = 7.7, 1.8 Hz, 1H), 7.50–7.39 (m, 1H), 6.85 (s, 1H), 6.84 (d,  $J$  = 7.6 Hz, 1H), 6.75 (d,  $J$  = 7.8 Hz, 1H), 5.32 (s, 2H), 3.82 (s, 3H), 3.82–3.79 (br s, 2H); <sup>13</sup>C NMR (101 MHz, CDCl<sub>3</sub>)  $\delta$  165.19, 149.98, 148.27, 147.57, 137.02, 136.35, 128.35, 126.92, 125.32, 119.40, 115.64, 110.19, 67.82, 55.61. HRMS (ESI<sup>+</sup>) Calcd. for [C<sub>14</sub>H<sub>14</sub>N<sub>2</sub>O<sub>3</sub>+H]<sup>+</sup> 281.0896, Found 281.0900.

### 1-(3-Aminophenyl)ethyl picolinate (**7**)

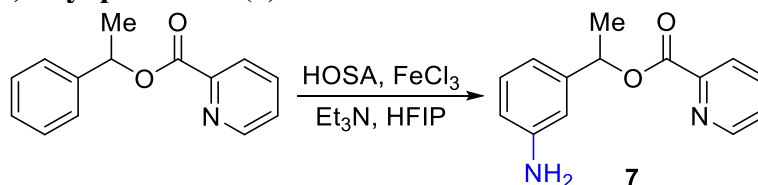

Following the general amination procedure, 1-phenylethyl picolinate (50 mg, 0.220 mmol), FeCl<sub>3</sub> (1.7 mg, 0.011 mmol), Et<sub>3</sub>N (61  $\mu$ L, 0.440 mmol), and HOSA (49 mg, 0.440 mmol) were stirred at rt in HFIP (2.2 mL) for 16 h. Chromatographic purification of the crude product afforded 1-(3-aminophenyl)ethyl picolinate (**7**) (36 mg, 68%) as an oil. TLC:  $R_f \approx 0.4$  (50% EtOAc/hexanes). <sup>1</sup>H NMR (400 MHz, CDCl<sub>3</sub>)  $\delta$  8.78 (d,  $J$  = 4.6 Hz, 1H), 8.12 (d,  $J$  = 7.8 Hz, 1H), 7.81 (td,  $J$  = 7.8, 1.7 Hz, 1H), 7.45 (dd,  $J$  = 7.6, 4.8 Hz, 1H), 7.13 (t,  $J$  = 7.8 Hz, 1H), 6.86 (d,  $J$  = 7.6 Hz, 1H), 6.80 (t,  $J$  = 1.9 Hz, 1H), 6.61 (dd,  $J$  = 8.2, 2.3 Hz, 1H), 6.11 (q,  $J$  = 6.6 Hz, 1H), 3.71 (br s, 2H), 1.69 (d,  $J$  = 6.6 Hz, 3H); <sup>13</sup>C NMR (101 MHz, CDCl<sub>3</sub>)  $\delta$  164.57, 150.07, 148.50, 146.70, 142.67, 137.02, 129.62, 126.89, 125.35, 116.49, 114.87, 112.96, 74.05, 22.32. HRMS (ESI<sup>+</sup>) Calcd. for [C<sub>14</sub>H<sub>14</sub>N<sub>2</sub>O<sub>2</sub>+H]<sup>+</sup> 265.0947, Found 265.0952.

### 1-(5-Amino-2-methylphenyl)ethyl picolinate (**8a**) and 1-(3-amino-2-methylphenyl)ethyl picolinate (**8b**)

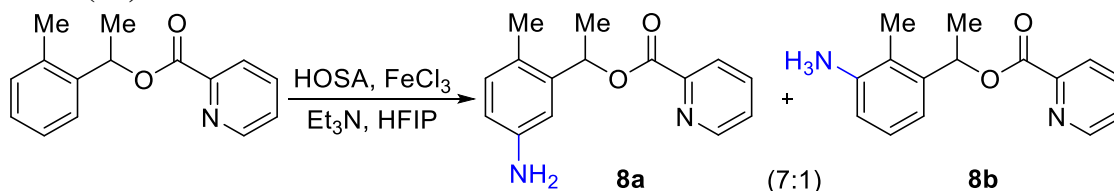

Following the general amination procedure, 1-(*o*-tolyl)ethyl picolinate (50 mg, 0.207 mmol), FeCl<sub>3</sub> (1.6 mg, 0.010 mmol), Et<sub>3</sub>N (57  $\mu$ L, 0.414 mmol), and HOSA (46 mg, 0.414 mmol) were stirred at rt in HFIP (2 mL) for 16 h. Chromatographic purification of the crude product afforded 1-(5-amino-2-methylphenyl)ethyl picolinate (**8a**) (35 mg) as an oil and 1-(3-amino-2-methylphenyl)ethyl picolinate (**8b**) (4 mg) as an oil for a 75% combined yield.

**1-(5-Amino-2-methylphenyl)ethyl picolinate (8a):** TLC:  $R_f \approx 0.5$  (70% EtOAc/hexanes).  $^1\text{H}$  NMR (400 MHz,  $\text{CDCl}_3$ )  $\delta$  8.79 (d,  $J = 4.7$  Hz, 1H), 8.12 (d,  $J = 7.8$  Hz, 1H), 7.82 (td,  $J = 7.8, 1.8$  Hz, 1H), 7.49–7.44 (m, 1H), 6.94 (d,  $J = 8.0$  Hz, 1H), 6.89 (d,  $J = 2.4$  Hz, 1H), 6.54 (dd,  $J = 8.0, 2.5$  Hz, 1H), 6.29 (q,  $J = 6.6$  Hz, 1H), 3.60 (br s, 2H), 2.32 (s, 3H), 1.66 (d,  $J = 6.6$  Hz, 3H);  $^{13}\text{C}$  NMR (101 MHz,  $\text{CDCl}_3$ )  $\delta$  164.58, 150.08, 148.55, 144.79, 140.74, 137.04, 131.39, 126.90, 125.36, 124.82, 114.93, 112.45, 71.20, 21.61, 18.35. HRMS ( $\text{ESI}^+$ ) Calcd. for  $[\text{C}_{15}\text{H}_{16}\text{N}_2\text{O}_2+\text{H}]^+$  257.1284, Found 257.1287.

**1-(3-Amino-2-methylphenyl)ethyl picolinate (8b):** TLC:  $R_f \approx 0.6$  (70% EtOAc/hexanes).  $^1\text{H}$  NMR (500 MHz,  $\text{CDCl}_3$ )  $\delta$  8.82 (d,  $J = 4.4$  Hz, 1H), 8.15 (d,  $J = 7.8$  Hz, 1H), 7.85 (td,  $J = 7.7, 1.4$  Hz, 1H), 7.53–7.44 (m, 1H), 7.08 (t,  $J = 7.7$  Hz, 1H), 7.05 (d,  $J = 7.4$  Hz, 1H), 6.68 (d,  $J = 7.5$  Hz, 1H), 6.45 (q,  $J = 6.5$  Hz, 1H), 3.66 (br s, 2H), 2.24 (s, 3H), 1.72 (d,  $J = 6.6$  Hz, 3H);  $^{13}\text{C}$  NMR (101 MHz,  $\text{CDCl}_3$ )  $\delta$  164.57, 150.15, 148.53, 144.90, 140.47, 137.03, 126.89, 126.81, 125.30, 119.56, 116.24, 114.95, 71.62, 21.69, 12.47. HRMS ( $\text{ESI}^+$ ) Calcd. for  $[\text{C}_{15}\text{H}_{16}\text{N}_2\text{O}_2+\text{H}]^+$  257.1284, Found 257.1284.

**(R)-1-(3-Aminophenyl)-2-methoxy-2-oxoethyl picolinate (9)**

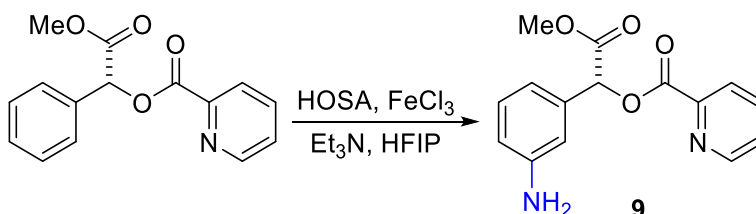

Following the general amination procedure, (*R*)-2-methoxy-2-oxo-1-phenylethyl picolinate (50 mg, 0.184 mmol),  $\text{FeCl}_3$  (1.4 mg, 0.009 mmol),  $\text{Et}_3\text{N}$  (51  $\mu\text{L}$ , 0.368 mmol), and HOSA (41 mg, 0.368 mmol) were stirred at 40  $^\circ\text{C}$  in HFIP (1.8 mL) for 24 h. Chromatographic purification of the crude product afforded (*R*)-1-(3-aminophenyl)-2-methoxy-2-oxoethyl picolinate (**9**) (36 mg, 71%) as an oil.  $^1\text{H}$  NMR (400 MHz,  $\text{CDCl}_3$ )  $\delta$  8.79 (d,  $J = 4.2$  Hz, 1H), 8.19 (d,  $J = 7.8$  Hz, 1H), 7.84 (td,  $J = 7.8, 1.6$  Hz, 1H), 7.51–7.46 (m, 1H), 7.18 (t,  $J = 7.8$  Hz, 1H), 6.94 (d,  $J = 7.6$  Hz, 1H), 6.90 (s, 1H), 6.70 (d,  $J = 7.9$  Hz, 1H), 6.13 (s, 1H), 3.79 (br s, 2H), 3.75 (s, 3H);  $^{13}\text{C}$  NMR (101 MHz,  $\text{CDCl}_3$ )  $\delta$  169.20, 164.44, 150.29, 147.40, 147.06, 137.09, 134.60, 129.95, 127.31, 125.72, 118.10, 116.19, 114.20, 75.60, 52.90. HRMS ( $\text{ESI}^+$ ) Calcd. for  $[\text{C}_{15}\text{H}_{14}\text{N}_2\text{O}_4+\text{H}]^+$  287.1026, Found 287.1029.

**(3-Aminophenyl)(cyano)methyl picolinate (10)**

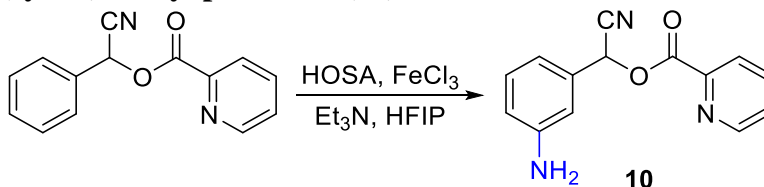

Following the general amination procedure, cyano(phenyl)methyl picolinate (50 mg, 0.210 mmol),  $\text{FeCl}_3$  (1.7 mg, 0.010 mmol),  $\text{Et}_3\text{N}$  (117  $\mu\text{L}$ , 0.840 mmol), and HOSA (94 mg, 0.840 mmol) were stirred at 0  $^\circ\text{C}$  in HFIP (2.1 mL) for 8 h. Chromatographic purification of the crude product afforded (3-aminophenyl)(cyano)methyl picolinate (**10**) (21 mg, 41%) as an oil. TLC:  $R_f \approx 0.4$  (50% EtOAc/hexanes).  $^1\text{H}$  NMR (400 MHz,  $\text{CDCl}_3$ )  $\delta$  8.79 (d,  $J = 4.4$  Hz, 1H), 8.15 (d,  $J = 7.8$  Hz, 1H), 7.92–7.81 (m, 1H), 7.58–7.47 (m, 1H), 7.22 (t,  $J = 7.8$  Hz, 1H), 6.98 (d,  $J = 7.6$  Hz, 1H),

6.94 (s, 1H), 6.78–6.70 (d,  $J = 7.8$  Hz, 1H), 6.65 (s, 1H), 3.85 (br s, 2H);  $^{13}\text{C}$  NMR (101 MHz,  $\text{CDCl}_3$ )  $\delta$  163.41, 150.47, 147.39, 146.53, 137.32, 132.52, 130.39, 127.84, 126.05, 118.08, 117.09, 116.07, 114.26, 64.18. HRMS ( $\text{ESI}^+$ ) Calcd. for  $[\text{C}_{14}\text{H}_{11}\text{N}_3\text{O}_2+\text{H}]^+$  254.0924, Found 254.0925.

### 3-Amino-5-(trifluoromethyl)benzyl picolinate (**11**)

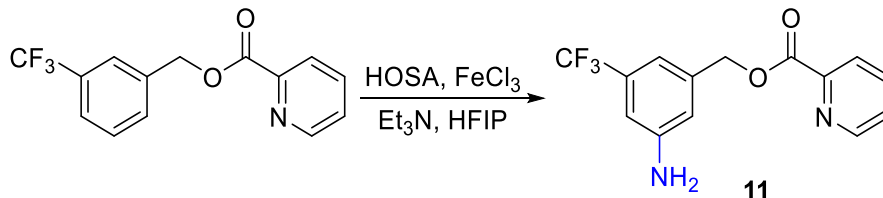

Following the general amination procedure, 3-(trifluoromethyl)benzyl picolinate (50 mg, 0.177 mmol),  $\text{FeCl}_3$  (1.4 mg, 0.008 mmol),  $\text{Et}_3\text{N}$  (49  $\mu\text{L}$ , 0.355 mmol), and HOSA (40 mg, 0.355 mmol) were stirred at 40  $^\circ\text{C}$  in HFIP (1.7 mL) for 24 h. Chromatographic purification of the crude product afforded 3-amino-5-(trifluoromethyl)benzyl picolinate (**11**) (36 mg, 71%) as an solid, mp 77-78  $^\circ\text{C}$ . TLC:  $R_f \approx 0.4$  (50% EtOAc/hexanes).  $^1\text{H}$  NMR (400 MHz,  $\text{CDCl}_3$ )  $\delta$  8.76 (d,  $J = 4.3$  Hz, 1H), 8.13 (d,  $J = 7.8$  Hz, 1H), 7.84 (tt,  $J = 7.8, 1.8$  Hz, 1H), 7.51–7.41 (m, 1H), 7.06 (s, 1H), 6.92 (s, 1H), 6.83 (s, 1H), 5.37 (s, 2H), 3.94 (br s, 2H);  $^{13}\text{C}$  NMR (101 MHz,  $\text{CDCl}_3$ )  $\delta$  165.03, 150.07, 147.80, 147.28, 137.73, 137.21, 132.51, 132.19, 131.87, 131.55, 128.10, 127.24, 125.49, 125.39, 122.68, 119.97, 117.80, 117.78, 114.94, 114.90, 114.86, 114.83, 111.47, 111.43, 111.40, 111.36, 66.86. HRMS ( $\text{ESI}^+$ ) Calcd. for  $[\text{C}_{14}\text{H}_{11}\text{F}_3\text{N}_2\text{O}_2+\text{H}]^+$  297.0841, Found 297.0845.

### 3-Amino-4-(methoxycarbonyl)benzyl picolinate (**12**)

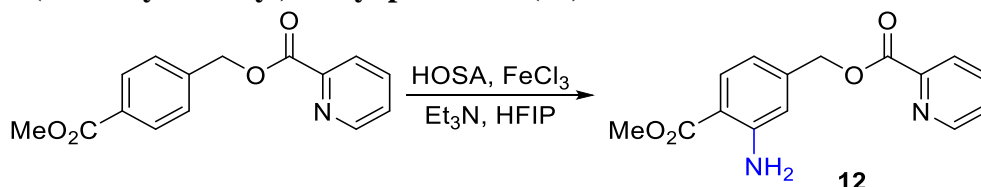

Following the general amination procedure, 4-(methoxycarbonyl)benzyl picolinate (50 mg, 0.184 mmol),  $\text{FeCl}_3$  (1.4 mg, 0.009 mmol),  $\text{Et}_3\text{N}$  (51  $\mu\text{L}$ , 0.368 mmol), and HOSA (41 mg, 0.368 mmol) were stirred at 40  $^\circ\text{C}$  in HFIP (1.8 mL) for 24 h. Chromatographic purification of the crude product afforded 3-amino-4-(methoxycarbonyl)benzyl picolinate (**12**) (26 mg, 51%) as an oil. TLC:  $R_f \approx 0.4$  (50% EtOAc/hexanes).  $^1\text{H}$  NMR (400 MHz,  $\text{CDCl}_3$ )  $\delta$  8.77 (d,  $J = 4.7$  Hz, 1H), 8.14 (d,  $J = 7.9$  Hz, 1H), 7.91–7.79 (m, 2H), 7.52–7.46 (m, 1H), 6.76 (s, 1H), 6.71 (d,  $J = 8.3$  Hz, 1H), 5.77 (br s, 2H), 5.36 (s, 2H), 3.85 (s, 3H);  $^{13}\text{C}$  NMR (101 MHz,  $\text{CDCl}_3$ )  $\delta$  168.41, 165.03, 150.67, 150.12, 147.92, 141.94, 137.18, 131.83, 127.21, 125.49, 115.82, 115.76, 110.56, 66.83, 51.71. HRMS ( $\text{ESI}^+$ ) Calcd. for  $[\text{C}_{15}\text{H}_{14}\text{N}_2\text{O}_4+\text{H}]^+$  287.1026, Found 287.1024.

### 3-Amino-4-bromobenzyl picolinate (**13**)

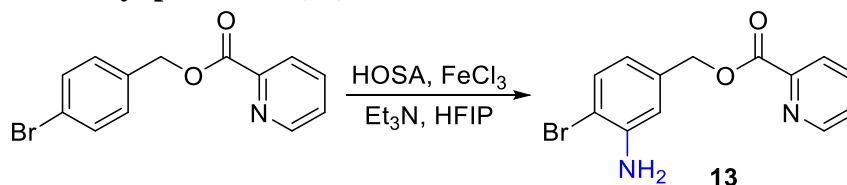

Following the general amination procedure, 4-bromobenzyl picolinate (50 mg, 0.171 mmol),  $\text{FeCl}_3$  (1.3 mg, 0.008 mmol),  $\text{Et}_3\text{N}$  (47  $\mu\text{L}$ , 0.343 mmol), and HOSA (38 mg, 0.343 mmol) were stirred

at 40 °C in HFIP (1.7 mL) for 24 h. Chromatographic purification of the crude product afforded 3-amino-4-bromobenzyl picolinate (**13**) (38 mg, 74%) as a solid, mp 79-80 °C. TLC:  $R_f \approx 0.4$  (70% EtOAc/hexanes).  $^1\text{H}$  NMR (400 MHz,  $\text{CDCl}_3$ )  $\delta$  8.76 (d,  $J = 4.6$  Hz, 1H), 8.12 (d,  $J = 7.8$  Hz, 1H), 7.83 (td,  $J = 7.8, 1.8$  Hz, 1H), 7.51–7.43 (m, 1H), 7.38 (d,  $J = 8.1$  Hz, 1H), 6.88 (d,  $J = 2.0$  Hz, 1H), 6.71 (dd,  $J = 8.2, 2.0$  Hz, 1H), 5.31 (s, 2H), 3.83 (br s, 2H);  $^{13}\text{C}$  NMR (101 MHz,  $\text{CDCl}_3$ )  $\delta$  165.08, 150.06, 147.98, 144.34, 137.14, 136.20, 132.84, 127.14, 125.43, 119.47, 115.69, 109.27, 67.02. HRMS ( $\text{ESI}^+$ ) Calcd. for  $[\text{C}_{13}\text{H}_{11}\text{BrN}_2\text{O}_2+\text{H}]^+$  307.0076, Found 307.0079.

### 5-Amino-2-chlorobenzyl picolinate (**14a**) and 3-Amino-2-chlorobenzyl picolinate (**14b**)

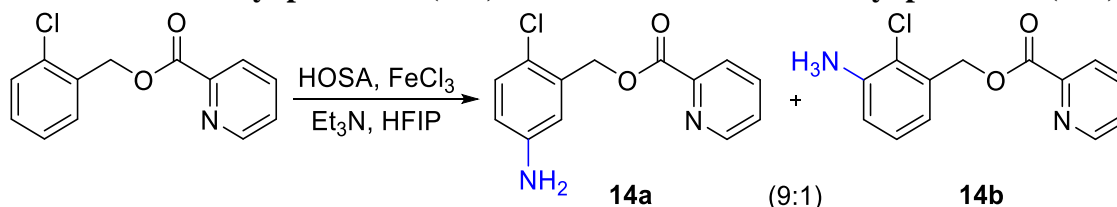

Following the general amination procedure, 2-chlorobenzyl picolinate (50 mg, 0.202 mmol),  $\text{FeCl}_3$  (1.6 mg, 0.010 mmol),  $\text{Et}_3\text{N}$  (56  $\mu\text{L}$ , 0.404 mmol), and HOSA (45 mg, 0.404 mmol) were stirred at 40 °C in HFIP (2 mL) for 16 h. Chromatographic purification of the crude product afforded 5-amino-2-chlorobenzyl picolinate (**14a**) (36 mg) as an oil and 3-amino-2-chlorobenzyl picolinate (**14b**) (4 mg) as an oil for a 76% combined yield.

**5-Amino-2-chlorobenzyl picolinate (14a)**: TLC:  $R_f \approx 0.4$  (70% EtOAc/hexanes).  $^1\text{H}$  NMR (400 MHz,  $\text{CDCl}_3$ )  $\delta$  8.78 (d,  $J = 4.1$  Hz, 1H), 8.15 (d,  $J = 7.8$  Hz, 1H), 7.85 (td,  $J = 7.8, 1.6$  Hz, 1H), 7.53–7.45 (m, 1H), 7.15 (d,  $J = 8.5$  Hz, 1H), 6.84 (d,  $J = 2.8$  Hz, 1H), 6.58 (dd,  $J = 8.5, 2.8$  Hz, 1H), 5.47 (s, 2H), 3.60 (br s, 2H);  $^{13}\text{C}$  NMR (101 MHz,  $\text{CDCl}_3$ )  $\delta$  164.94, 150.15, 148.00, 145.47, 137.17, 133.93, 130.25, 127.15, 125.53, 122.50, 116.38, 116.20, 64.93. HRMS ( $\text{ESI}^+$ ) Calcd. for  $[\text{C}_{13}\text{H}_{11}\text{ClN}_2\text{O}_2+\text{H}]^+$  263.0581, Found 263.0584.

**3-Amino-2-chlorobenzyl picolinate (14b)**: TLC:  $R_f \approx 0.6$  (70% EtOAc/hexanes).  $^1\text{H}$  NMR (400 MHz,  $\text{CDCl}_3$ )  $\delta$  8.78 (d,  $J = 4.6$  Hz, 1H), 8.15 (d,  $J = 7.6$  Hz, 1H), 7.84 (t,  $J = 7.7$  Hz, 1H), 7.53–7.43 (m, 1H), 7.07 (t,  $J = 7.8$  Hz, 1H), 6.92 (d,  $J = 7.5$  Hz, 1H), 6.77 (d,  $J = 8.0$  Hz, 1H), 5.52 (s, 2H), 4.13 (br s, 2H);  $^{13}\text{C}$  NMR (101 MHz,  $\text{CDCl}_3$ )  $\delta$  164.93, 150.18, 148.03, 143.49, 137.14, 134.00, 127.36, 127.10, 125.49, 119.50, 118.76, 115.98, 65.41. HRMS ( $\text{ESI}^+$ ) Calcd. for  $[\text{C}_{13}\text{H}_{11}\text{ClN}_2\text{O}_2+\text{H}]^+$  263.0581, Found 263.0583.

### 3-Amino-4,5-dichlorobenzyl picolinate (**15**)

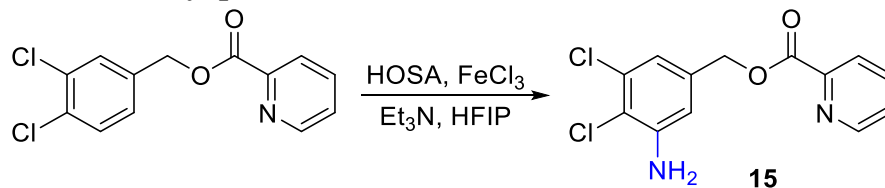

Following the general amination procedure, 3,4-dichlorobenzyl picolinate (50 mg, 0.159 mmol),  $\text{FeCl}_3$  (1.2 mg, 0.007 mmol),  $\text{Et}_3\text{N}$  (88  $\mu\text{L}$ , 0.638 mmol), and HOSA (72 mg, 0.638 mmol) were stirred at rt in HFIP (1.5 mL) for 24 h. Chromatographic purification of the crude product afforded 3-amino-4,5-dichlorobenzyl picolinate (**15**) (22 mg, 43%) as an oil. TLC:  $R_f \approx 0.3$  (50% EtOAc/hexanes).  $^1\text{H}$  NMR (400 MHz,  $\text{CDCl}_3$ )  $\delta$  8.84–8.71 (m, 1H), 8.14 (d,  $J = 9.0$  Hz, 1H), 7.85 (t,  $J = 7.7$  Hz, 1H), 7.53–7.46 (m, 1H), 6.96 (s, 1H), 6.78 (s, 1H), 5.29 (s, 2H), 4.24 (br s, 2H);  $^{13}\text{C}$  NMR (101 MHz,  $\text{CDCl}_3$ )  $\delta$  165.03, 150.13, 147.82, 144.72, 137.22, 135.64, 133.35, 127.28,



125.52, 119.39, 117.47, 113.58, 66.45. HRMS (ESI<sup>+</sup>) Calcd. for [C<sub>13</sub>H<sub>10</sub>Cl<sub>2</sub>N<sub>2</sub>O<sub>2</sub>+H]<sup>+</sup> 297.0192, Found 297.0196.

### 3-Amino-4-methoxy-5-nitrobenzyl picolinate (**16**)

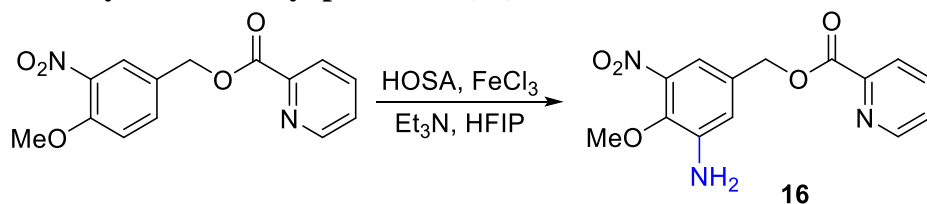

Following the general amination procedure, 4-methoxy-3-nitrobenzyl picolinate (50 mg, 0.173 mmol), FeCl<sub>3</sub> (1.4 mg, 0.008 mmol), Et<sub>3</sub>N (48 μL, 0.347 mmol), and HOSA (39 mg, 0.347 mmol) were stirred at 40 °C in HFIP (1.7 mL) for 24 h. Chromatographic purification of the crude product afforded 3-amino-4-methoxy-5-nitrobenzyl picolinate (**16**) (7 mg, 15%) as an oil. TLC: R<sub>f</sub> ≈ 0.4 (50% EtOAc/hexanes). <sup>1</sup>H NMR (400 MHz, CDCl<sub>3</sub>) δ 8.77 (d, *J* = 4.7 Hz, 1H), 8.14 (d, *J* = 7.8 Hz, 1H), 7.86 (td, *J* = 7.8, 1.7 Hz, 1H), 7.52–7.47 (m, 1H), 7.31 (d, *J* = 2.0 Hz, 1H), 7.07 (d, *J* = 2.0 Hz, 1H), 5.34 (s, 2H), 4.14 (s, 2H), 3.88 (s, 3H); <sup>13</sup>C NMR (101 MHz, CDCl<sub>3</sub>) δ 165.03, 150.15, 147.72, 143.98, 142.53, 140.33, 137.26, 132.33, 127.35, 125.56, 119.60, 114.18, 66.31, 61.18. HRMS (ESI<sup>+</sup>) Calcd. for [C<sub>14</sub>H<sub>13</sub>N<sub>3</sub>O<sub>5</sub>+H]<sup>+</sup> 304.0928, Found 304.0928.

### 3-Aminophenethyl picolinate (**17a**) and 4-aminophenethyl picolinate (**17b**)

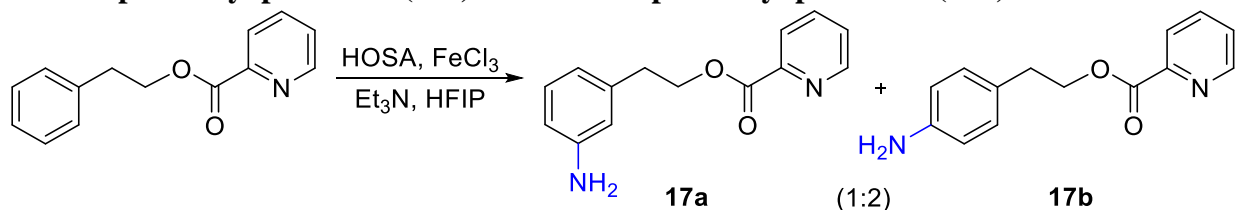

Following the general amination procedure, phenethyl picolinate (50 mg, 0.221 mmol), FeCl<sub>3</sub> (1.8 mg, 0.011 mmol), Et<sub>3</sub>N (123 μL, 0.881 mmol), and HOSA (99 mg, 0.881 mmol) were stirred at rt in HFIP (2.2 mL) for 18 h. Chromatographic purification of the crude product afforded 3-aminophenethyl picolinate (**17a**) (11 mg) as an oil and 4-aminophenethyl picolinate (**17b**) (22 mg) as an oil (33 mg) for a 64% combined yield.

**3-Aminophenethyl picolinate (17a):** <sup>1</sup>H NMR (400 MHz, CDCl<sub>3</sub>) δ 8.82–8.71 (m, 1H), 8.11 (d, *J* = 7.8 Hz, 1H), 7.90–7.76 (m, 1H), 7.48 (dd, *J* = 7.6, 4.7 Hz, 1H), 7.09 (t, *J* = 7.7 Hz, 1H), 6.68 (d, *J* = 7.5 Hz, 1H), 6.62 (t, *J* = 1.8 Hz, 1H), 6.57 (d, *J* = 7.8 Hz, 1H), 4.59 (t, *J* = 7.6 Hz, 2H), 3.66 (br s, 2H), 3.04 (t, *J* = 7.6 Hz, 2H); <sup>13</sup>C NMR (101 MHz, CDCl<sub>3</sub>) δ 165.07, 149.89, 148.09, 146.57, 138.51, 137.00, 129.49, 126.87, 125.15, 119.23, 115.66, 113.47, 66.36, 35.12. HRMS (ESI<sup>+</sup>) Calcd. for [C<sub>14</sub>H<sub>14</sub>N<sub>2</sub>O<sub>2</sub>+H]<sup>+</sup> 243.1133, Found 243.1139.

**4-Aminophenethyl picolinate (17b):** <sup>1</sup>H NMR (400 MHz, CDCl<sub>3</sub>) δ 8.76 (d, *J* = 4.1 Hz, 1H), 8.09 (d, *J* = 7.8 Hz, 1H), 7.83 (td, *J* = 7.8, 1.7 Hz, 1H), 7.50–7.45 (m, 1H), 7.06 (d, *J* = 8.2 Hz, 2H), 6.64 (d, *J* = 8.3 Hz, 2H), 4.54 (t, *J* = 7.6 Hz, 2H), 3.64 (br s, 2H), 3.02 (t, *J* = 7.6 Hz, 2H); <sup>13</sup>C NMR (101 MHz, CDCl<sub>3</sub>) δ 165.07, 149.88, 148.13, 144.97, 136.98, 129.83, 127.17, 126.84, 125.12, 115.33, 66.73, 34.30. HRMS (ESI<sup>+</sup>) Calcd. for [C<sub>14</sub>H<sub>14</sub>N<sub>2</sub>O<sub>2</sub>+H]<sup>+</sup> 243.1133, Found 243.1134.

### (*R*)-4-(3-Aminophenyl)-1-ethoxy-1-oxobutan-2-yl picolinate (**18a**) and ((*R*))-4-(4-Aminophenyl)-1-ethoxy-1-oxobutan-2-yl picolinate (**18b**)

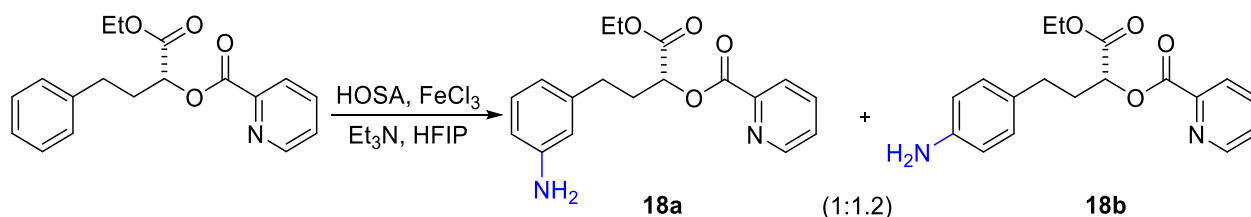

Following the general amination procedure, (*R*)-1-ethoxy-1-oxo-4-phenylbutan-2-yl picolinate (50 mg, 0.159 mmol), FeCl<sub>3</sub> (1.2 mg, 0.007 mmol), Et<sub>3</sub>N (88  $\mu$ L, 0.638 mmol), and HOSA (72 mg, 0.638 mmol) were stirred at 40 °C in HFIP (1.5 mL) for 24 h. Chromatographic purification of the crude product afforded (*R*)-4-(3-aminophenyl)-1-ethoxy-1-oxobutan-2-yl picolinate (**18a**) (15 mg) as an oil and (*R*)-4-(4-aminophenyl)-1-ethoxy-1-oxobutan-2-yl picolinate (**18b**) (19 mg) as an oil for a 66% combined yield.

(*R*)-4-(3-Aminophenyl)-1-ethoxy-1-oxobutan-2-yl picolinate (**18a**): TLC:  $R_f \approx 0.4$  (70% EtOAc/hexanes). <sup>1</sup>H NMR (400 MHz, CDCl<sub>3</sub>)  $\delta$  8.81 (d,  $J = 7.2$  Hz, 1H), 8.13 (d,  $J = 9.8$  Hz, 1H), 7.86 (td,  $J = 7.7$ , 1.8 Hz, 1H), 7.53–7.48 (m, 1H), 7.07 (t,  $J = 7.7$  Hz, 1H), 6.61 (d,  $J = 7.7$  Hz, 1H), 6.56–6.50 (m, 2H), 5.32 (dd,  $J = 8.0$ , 5.1 Hz, 1H), 4.22 (q,  $J = 7.1$  Hz, 2H), 3.61 (br s, 2H), 2.79–2.69 (m, 2H), 2.41–2.29 (m, 2H), 1.27 (t,  $J = 7.1$  Hz, 3H); <sup>13</sup>C NMR (101 MHz, CDCl<sub>3</sub>)  $\delta$  169.91, 164.65, 150.28, 147.61, 146.69, 141.77, 137.12, 129.61, 127.26, 125.62, 118.91, 115.39, 113.23, 73.07, 61.70, 32.73, 31.61, 14.31. HRMS (ESI<sup>+</sup>) Calcd. for [C<sub>18</sub>H<sub>20</sub>N<sub>2</sub>O<sub>4</sub>+H]<sup>+</sup> 329.1495, Found 329.1501.

(*R*)-4-(4-Aminophenyl)-1-ethoxy-1-oxobutan-2-yl picolinate (**18b**): TLC:  $R_f \approx 0.5$  (70% EtOAc/hexanes). <sup>1</sup>H NMR (400 MHz, CDCl<sub>3</sub>)  $\delta$  8.81 (d,  $J = 4.3$  Hz, 1H), 8.13 (d,  $J = 7.8$  Hz, 1H), 7.86 (tt,  $J = 7.8$ , 2.0 Hz, 1H), 7.53–7.46 (m, 1H), 6.99 (dd,  $J = 8.4$ , 2.2 Hz, 2H), 6.62 (dd,  $J = 8.4$ , 2.1 Hz, 2H), 5.33–5.25 (m, 1H), 4.21 (qd,  $J = 7.1$ , 2.0 Hz, 2H), 3.51 (br s, 2H), 2.81–2.64 (m, 1H), 2.38–2.22 (m, 1H), 1.26 (td,  $J = 7.1$ , 2.0 Hz, 3H); <sup>13</sup>C NMR (101 MHz, CDCl<sub>3</sub>)  $\delta$  169.99, 164.65, 150.24, 147.59, 144.72, 137.09, 130.38, 129.46, 129.41, 127.22, 125.59, 115.47, 73.01, 61.63, 33.12, 30.72, 14.27. HRMS (ESI<sup>+</sup>) Calcd. for [C<sub>18</sub>H<sub>20</sub>N<sub>2</sub>O<sub>4</sub>+H]<sup>+</sup> 329.1495, Found 329.1509.

**(6-Amino-4-bromonaphthalen-1-yl)methyl picolinate (**19a**) and (3-amino-4-bromonaphthalen-1-yl)methyl picolinate (**19b**)**

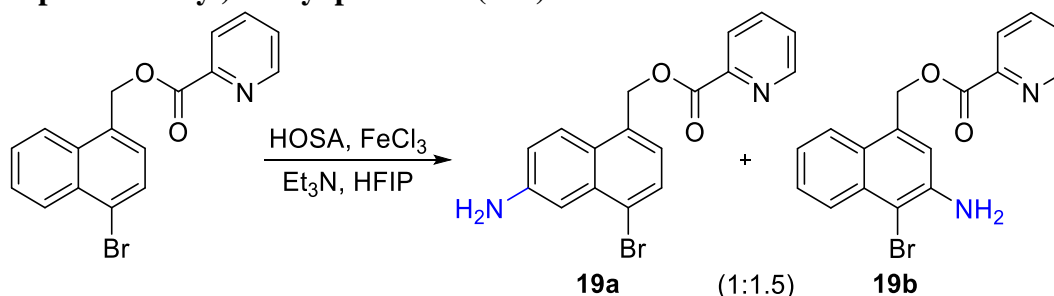

Following the general amination procedure, (3-amino-4-bromonaphthalen-1-yl)methyl picolinate (50 mg, 0.146 mmol), FeCl<sub>3</sub> (1.1 mg, 0.007 mmol), Et<sub>3</sub>N (40  $\mu$ L, 0.293 mmol), and HOSA (33 mg, 0.293 mmol) were stirred at 0 °C in HFIP (1.4 mL) for 10 h. Chromatographic purification of the crude product afforded (6-amino-4-bromonaphthalen-1-yl)methyl picolinate (**19a**) (13 mg) as an oil and (3-amino-4-bromonaphthalen-1-yl)methyl picolinate (**19b**) (19 mg) as an oil for a 62% combined yield.

(6-Amino-4-bromonaphthalen-1-yl)methyl picolinate (**19a**): TLC:  $R_f \approx 0.4$  (70% EtOAc/hexanes). <sup>1</sup>H NMR (400 MHz, CDCl<sub>3</sub>)  $\delta$  8.78 (d,  $J = 4.6$  Hz, 1H), 8.09 (d,  $J = 7.8$  Hz, 1H), 7.96 (d,  $J = 9.0$



Hz, 1H), 7.82 (td,  $J = 7.8, 1.8$  Hz, 1H), 7.69 (d,  $J = 7.6$  Hz, 1H), 7.50–7.45 (m, 1H), 7.44 (d,  $J = 2.4$  Hz, 1H), 7.28 (s, 1H), 5.81 (s, 2H), 4.08 (br s, 2H);  $^{13}\text{C}$  NMR (101 MHz,  $\text{CDCl}_3$ )  $\delta$  165.07, 150.17, 147.98, 145.73, 137.13, 133.97, 131.15, 129.99, 127.12, 126.97, 125.69, 125.45, 124.69, 122.10, 119.38, 108.72, 65.62. HRMS (ESI<sup>+</sup>) Calcd. for  $[\text{C}_{17}\text{H}_{13}\text{BrN}_2\text{O}_2+\text{H}]^+$  357.0233, Found 357.0220.

**(3-Amino-4-bromonaphthalen-1-yl)methyl picolinate (19b)**: TLC:  $R_f \approx 0.5$  (70% EtOAc/hexanes).  $^1\text{H}$  NMR (400 MHz,  $\text{CDCl}_3$ )  $\delta$  8.76 (d,  $J = 4.3$  Hz, 1H), 8.14–8.05 (m, 2H), 7.96 (d,  $J = 8.4$  Hz, 1H), 7.80 (t,  $J = 7.7$  Hz, 1H), 7.53 (t,  $J = 7.7$  Hz, 1H), 7.51–7.43 (m, 1H), 7.35 (t,  $J = 7.5$  Hz, 1H), 7.23 (s, 1H), 5.81 (s, 2H), 4.41 (brs, 2H);  $^{13}\text{C}$  NMR (101 MHz,  $\text{CDCl}_3$ )  $\delta$  165.02, 150.15, 147.89, 141.67, 137.16, 133.49, 131.92, 127.88, 127.18, 126.70, 125.86, 125.82, 125.48, 123.80, 123.66, 119.50, 104.88, 65.21. HRMS (ESI<sup>+</sup>) Calcd. for  $[\text{C}_{17}\text{H}_{13}\text{BrN}_2\text{O}_2+\text{H}]^+$  357.0233, Found 357.0227.

**(8-Aminonaphthalen-2-yl)methyl picolinate (20a) and (4-aminonaphthalen-2-yl)methyl picolinate (20b)**

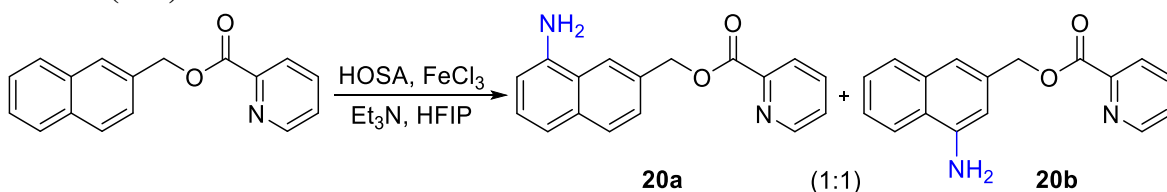

Following the general amination procedure, naphthalen-2-ylmethyl picolinate (50 mg, 0.190 mmol),  $\text{FeCl}_3$  (1.5 mg, 0.009 mmol),  $\text{Et}_3\text{N}$  (52  $\mu\text{L}$ , 0.380 mmol), and HOSA (42 mg, 0.380 mmol) were stirred at rt in HFIP (1.9 mL) for 16 h. Chromatographic purification of the crude product afforded (8-aminonaphthalen-2-yl)methyl picolinate (**20a**) (19 mg) as an oil and (4-aminonaphthalen-2-yl)methyl picolinate (**20b**) (19 mg) as an oil for a 66% combined yield.

**(8-Aminonaphthalen-2-yl)methyl picolinate (20a)**: TLC:  $R_f \approx 0.4$  (70% EtOAc/hexanes).  $^1\text{H}$  NMR (500 MHz,  $\text{CDCl}_3$ )  $\delta$  8.77 (d,  $J = 4.2$  Hz, 1H), 8.14 (d,  $J = 7.9$  Hz, 1H), 7.96 (s, 1H), 7.83 (dd,  $J = 7.6, 1.9$  Hz, 1H), 7.80 (d,  $J = 6.6$  Hz, 1H), 7.58 (dd,  $J = 8.4, 1.6$  Hz, 1H), 7.49–7.45 (m, 1H), 7.30 (s, 1H), 7.29 (d,  $J = 1.7$  Hz, 1H), 6.79 (dd,  $J = 5.0, 3.4$  Hz, 1H), 5.62 (s, 2H), 4.23 (br s, 2H);  $^{13}\text{C}$  NMR (101 MHz,  $\text{CDCl}_3$ )  $\delta$  165.20, 150.06, 148.12, 142.43, 137.16, 134.34, 132.00, 129.20, 127.12, 127.05, 126.54, 125.45, 123.47, 121.66, 118.84, 110.27, 68.17. HRMS (ESI<sup>+</sup>) Calcd. for  $[\text{C}_{17}\text{H}_{14}\text{N}_2\text{O}_2+\text{H}]^+$  279.1128, Found 279.1125.

**(4-Aminonaphthalen-2-yl)methyl picolinate (20b)**: TLC:  $R_f \approx 0.5$  (70% EtOAc/hexanes).  $^1\text{H}$  NMR (500 MHz,  $\text{CDCl}_3$ )  $\delta$  8.78 (d,  $J = 4.7$  Hz, 1H), 8.15 (d,  $J = 7.9$  Hz, 1H), 7.88–7.75 (m, 4H), 7.52–7.43 (m, 3H), 6.90 (d,  $J = 1.5$  Hz, 1H), 5.53 (s, 2H), 4.23 (br s, 2H);  $^{13}\text{C}$  NMR (101 MHz,  $\text{CDCl}_3$ )  $\delta$  165.24, 150.10, 148.21, 142.68, 137.14, 134.34, 133.75, 128.89, 127.08, 126.44, 125.47, 123.66, 120.83, 119.01, 109.64, 68.03. HRMS (ESI<sup>+</sup>) Calcd. for  $[\text{C}_{17}\text{H}_{14}\text{N}_2\text{O}_2+\text{H}]^+$  279.1128, Found 279.1130.

**(4'-Amino-[1,1'-biphenyl]-2-yl)methyl picolinate (21a) and (3'-Amino-[1,1'-biphenyl]-2-yl)methyl picolinate (21b)**

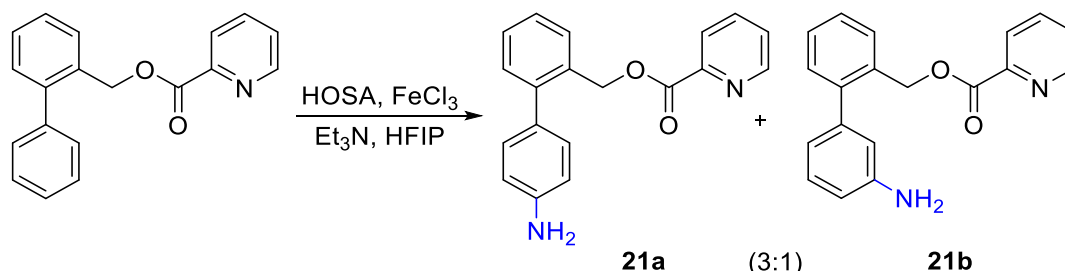

Following the general amination procedure, (1,1'-biphenyl)-2-ylmethyl picolinate (50 mg, 0.172 mmol),  $\text{FeCl}_3$  (1.3 mg, 0.008 mmol),  $\text{Et}_3\text{N}$  (48  $\mu\text{L}$ , 0.345 mmol), and HOSA (39 mg, 0.345 mmol) were stirred at rt in HFIP (1.7 mL) for 16 h. Chromatographic purification of the crude product afforded (4'-amino-[1,1'-biphenyl]-2-yl)methyl picolinate (**21a**) (24 mg) as an oil and (3'-amino-[1,1'-biphenyl]-2-yl)methyl picolinate (**21b**) (7 mg) as an oil for a 61% combined yield.

(4'-Amino-[1,1'-biphenyl]-2-yl)methyl picolinate (**21a**): TLC:  $R_f \approx 0.4$  (50% EtOAc/hexanes).

$^1\text{H}$  NMR (400 MHz,  $\text{CDCl}_3$ )  $\delta$  8.77 (d,  $J = 4.3$  Hz, 1H), 8.07 (d,  $J = 7.8$  Hz, 1H), 7.82 (td,  $J = 7.7$ , 1.6 Hz, 1H), 7.57 (dd,  $J = 7.2$ , 1.8 Hz, 1H), 7.49–7.43 (m, 1H), 7.40–7.28 (m, 3H), 7.18 (d,  $J = 8.4$  Hz, 2H), 6.71 (d,  $J = 8.4$  Hz, 2H), 5.40 (s, 2H), 3.79 (br s, 2H);  $^{13}\text{C}$  NMR (101 MHz,  $\text{CDCl}_3$ )  $\delta$  164.92, 150.10, 148.16, 145.84, 142.62, 137.06, 133.05, 130.61, 130.40, 130.26, 129.59, 128.43, 127.18, 126.97, 125.28, 114.97, 65.94. HRMS ( $\text{ESI}^+$ ) Calcd. for  $[\text{C}_{19}\text{H}_{16}\text{N}_2\text{O}_2 + \text{H}]^+$  305.1284, Found 305.1292.

(3'-Amino-[1,1'-biphenyl]-2-yl)methyl picolinate (**21b**): TLC:  $R_f \approx 0.4$  (50% EtOAc/hexanes).  $^1\text{H}$  NMR (400 MHz,  $\text{CDCl}_3$ )  $\delta$  8.77 (d,  $J = 4.0$  Hz, 1H), 8.07 (d,  $J = 7.8$  Hz, 1H), 7.82 (td,  $J = 7.7$ , 1.7 Hz, 1H), 7.61–7.54 (m, 1H), 7.49–7.44 (m, 1H), 7.38–7.27 (m, 3H), 7.17 (t,  $J = 7.7$  Hz, 1H), 6.76 (dt,  $J = 7.5$ , 1.2 Hz, 1H), 6.73 (t,  $J = 2.0$  Hz, 1H), 6.66 (ddd,  $J = 7.9$ , 2.4, 0.9 Hz, 1H), 5.39 (s, 2H), 3.73 (s, 2H);  $^{13}\text{C}$  NMR (101 MHz,  $\text{CDCl}_3$ )  $\delta$  164.94, 150.12, 148.22, 146.36, 142.72, 141.57, 137.09, 133.02, 130.10, 129.46, 129.29, 128.38, 127.65, 127.00, 125.33, 119.69, 116.16, 114.23, 65.81. HRMS ( $\text{ESI}^+$ ) Calcd. for  $[\text{C}_{19}\text{H}_{16}\text{N}_2\text{O}_2 + \text{H}]^+$  305.1284, Found 305.1287.

**(*R*)-1-(3-Aminophenyl)-2-(*S*)-1-((2-methoxy-2-oxoethyl)amino)-3,3-dimethyl-1-oxobutan-2-yl)amino)-2-oxoethyl picolinate (**22**)**

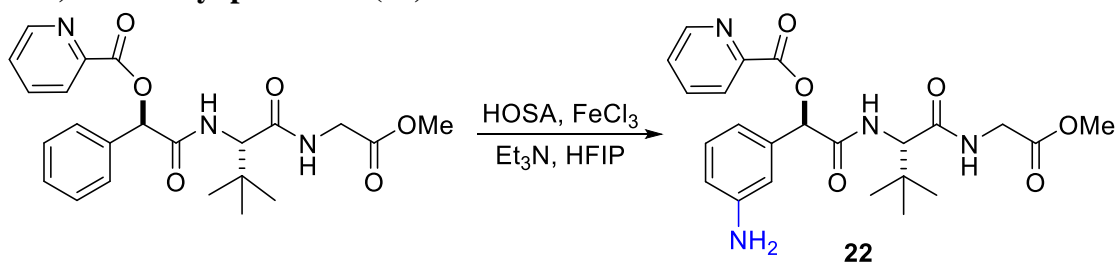

Following the general amination procedure, (*R*)-2-(*S*)-1-((2-methoxy-2-oxoethyl)amino)-3,3-dimethyl-1-oxobutan-2-yl)amino)-2-oxo-1-phenylethyl picolinate (50 mg, 0.113 mmol),  $\text{FeCl}_3$  (0.9 mg, 0.005 mmol),  $\text{Et}_3\text{N}$  (31  $\mu\text{L}$ , 0.226 mmol), and HOSA (25 mg, 0.226 mmol) were stirred at 40 °C in HFIP (1.1 mL) for 24 h. Chromatographic purification of the crude product afforded (*R*)-1-(3-aminophenyl)-2-(*S*)-1-((2-methoxy-2-oxoethyl)amino)-3,3-dimethyl-1-oxobutan-2-yl)amino)-2-oxoethyl picolinate (**22**) (36 mg, 72%) as an oil. TLC:  $R_f \approx 0.4$  (50% EtOAc/hexanes).  $^1\text{H}$  NMR (400 MHz,  $\text{CDCl}_3$ )  $\delta$  8.76 (d,  $J = 4.2$  Hz, 1H), 8.12 (d,  $J = 7.9$  Hz, 1H), 7.84 (td,  $J = 7.8$ , 1.7 Hz, 1H), 7.53–7.46 (m, 1H), 7.45 (br s, 1H), 7.12 (t,  $J = 7.8$  Hz, 1H), 7.07 (br s, 1H), 6.90 (d,  $J = 7.9$  Hz, 1H), 6.86 (t,  $J = 2.0$  Hz, 1H), 6.63 (dd,  $J = 7.9$ , 1.8 Hz, 1H), 6.29 (s, 1H), 4.49 (d,  $J = 9.5$  Hz, 1H), 3.95 (dd,  $J = 17.9$ , 6.0 Hz, 1H), 3.87 (br s, 2H), 3.71 (s, 3H), 3.66 (dd,  $J = 17.9$ , 6.0

Hz, 1H), 0.97 (s, 9H);  $^{13}\text{C}$  NMR (101 MHz,  $\text{CDCl}_3$ )  $\delta$  170.58, 170.24, 168.55, 163.77, 150.20, 147.42, 147.29, 137.25, 136.20, 129.82, 127.49, 125.44, 118.28, 116.01, 114.14, 76.53, 60.34, 52.32, 41.01, 34.99, 26.55. HRMS ( $\text{ESI}^+$ ) Calcd. for  $[\text{C}_{23}\text{H}_{28}\text{N}_4\text{O}_6+\text{H}]^+$  457.2081, Found 457.2073.

#### 4-(3-Amino-4-methylphenyl)-4-(picolinoyloxy)butyl pyrazine-2-carboxylate (**23**)

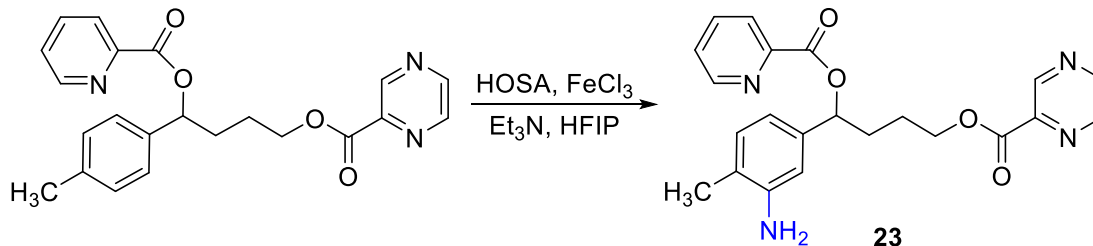

Following the general amination procedure, 4-(picolinoyloxy)4-(*p*-tolyl)butyl pyrazine-2-carboxylate (50 mg, 0.133 mmol),  $\text{FeCl}_3$  (1.1 mg, 0.007 mmol), TEA (74  $\mu\text{L}$ , 0.265 mmol), and HOSA (60 mg, 0.531 mmol) were stirred at rt in HFIP (1.5 mL) for 16 h. The residue was purified using a commercial pre-packed  $\text{SiO}_2$  column on a medium pressure, automated chromatograph using a gradient of 3-7%  $\text{MeOH}/\text{CH}_2\text{Cl}_2$  to afford 4-(3-Amino-4-methylphenyl)-4-(picolinoyloxy)butyl pyrazine-2-carboxylate (**23**) (30 mg, 56%) as a viscous oil. TLC:  $R_f \approx 0.5$  (10%  $\text{MeOH}/\text{CH}_2\text{Cl}_2$ ).  $^1\text{H}$  NMR (500 MHz,  $\text{CDCl}_3$ )  $\delta$  9.31 (d,  $J = 1.4$  Hz, 1H), 8.81–8.77 (m, 2H), 8.74 (t,  $J = 1.9$  Hz, 1H), 8.13 (d,  $J = 7.8$  Hz, 1H), 7.84 (td,  $J = 7.8, 1.7$  Hz, 1H), 7.50–7.46 (m, 1H), 7.04 (d,  $J = 7.5$  Hz, 1H), 6.84–6.82 (m, 2H), 6.08–6.00 (m, 1H), 4.53–4.48 (m, 2H), 3.70 (br s, 2H), 2.33–2.27 (m, 1H), 2.17–2.11 (m, 4H), 2.04–1.98 (m, 1H), 1.94–1.88 (m, 1H);  $^{13}\text{C}$  NMR (101 MHz,  $\text{CDCl}_3$ )  $\delta$  164.47, 163.83, 149.91, 148.20, 147.61, 146.26, 144.68, 144.43, 143.40, 138.50, 136.90, 130.61, 126.82, 125.26, 122.41, 116.84, 113.06, 65.85, 32.50, 25.01, 17.13. HRMS ( $\text{ESI}^+$ ) Calcd. for  $[\text{C}_{22}\text{H}_{22}\text{N}_2\text{O}_4+\text{H}]^+$  407.1719, Found 407.1728.

#### Control Experiments

##### Benzyl benzoate as substrate

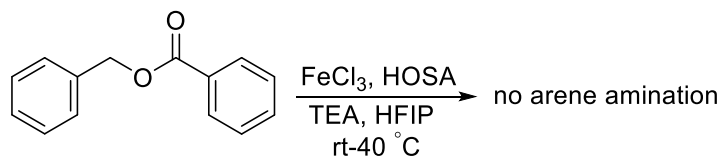

Following the general amination procedure, benzyl benzoate (50 mg, 0.235 mmol),  $\text{FeCl}_3$  (1.9 mg, 0.011 mmol), TEA (65  $\mu\text{L}$ , 0.471 mmol), and HOSA (53 mg, 0.471 mmol) were stirred at rt in HFIP (2.3 mL). After stirring for 12 h, the reaction was warmed to 40  $^\circ\text{C}$  for 12 h. No amination product was observed by TLC or NMR.

##### Benzyl alcohol plus methyl picolinate as substrates

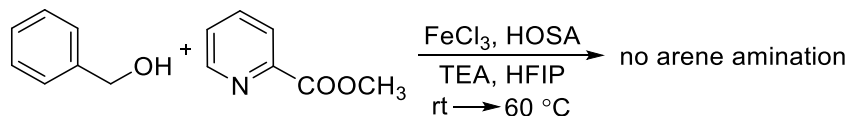

Following the general amination procedure, benzyl alcohol (50 mg, 0.462 mmol), methyl picolinate (63 mg, 0.463 mmol),  $\text{FeCl}_3$  (3.7 mg, 0.023 mmol), TEA (129  $\mu\text{L}$ , 0.926 mmol), and HOSA (105 mg, 0.926 mmol) were stirred at rt in HFIP (4.5 mL). After stirring for 12 h, the

reaction was warmed to 40 °C for 5 h, and then to 60 °C for additional 5 h. No amination product was observed by TLC or NMR.

### Benzyl benzoate plus methyl picolinate (1 equiv) as substrates

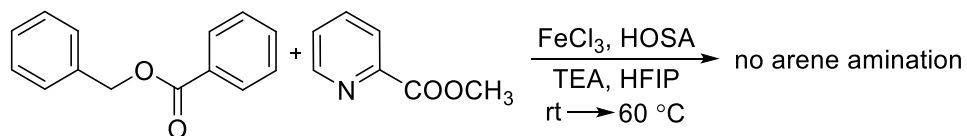

Following the general amination procedure, benzyl benzoate (50 mg, 0.237 mmol), methyl picolinate (32 mg, 0.237 mmol),  $\text{FeCl}_3$  (1.9 mg, 0.012 mmol), TEA (66  $\mu\text{L}$ , 0.474 mmol), and HOSA (54 mg, 0.474 mmol) were stirred at rt in HFIP (2.5 mL). After stirring for 12 h, the reaction was warmed to 40 °C for 5 h, and then to 60 °C for additional 5 h. No amination product was observed by TLC or NMR.

### Benzyl benzoate plus methyl picolinate (5 mol%) as substrates

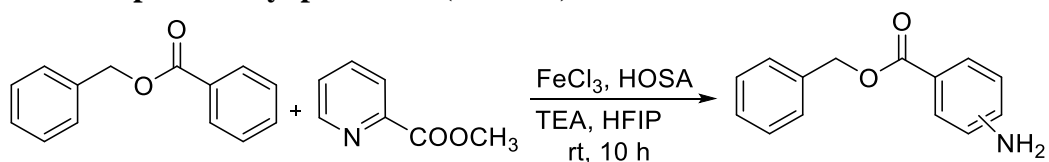

Following the general amination procedure, benzyl benzoate (50 mg, 0.237 mmol), methyl picolinate (1.6 mg, 0.012 mmol),  $\text{FeCl}_3$  (1.9 mg, 0.012 mmol), TEA (66  $\mu\text{L}$ , 0.474 mmol), and HOSA (54 mg, 0.474 mmol) were stirred at rt in HFIP (2.5 mL) for 10 h. Chromatographic purification of the crude product afforded mixed aminobenzyl benzoates (6 mg, 11%) along with recovered benzyl benzoate (39 mg, 78%), both as viscous oils.

### Benzyl benzoate plus dimethylbenzyl picolinate (5 – 100 mol%) as substrates

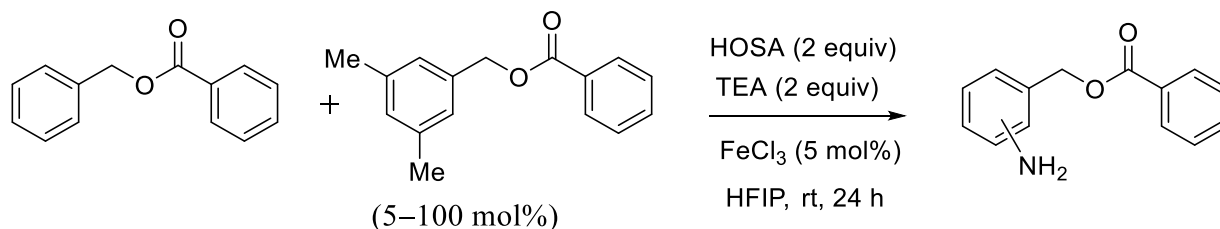

Following the general amination procedure, benzyl benzoate (50 mg, 0.207 mmol),  $\text{FeCl}_3$  (1.7 mg, 0.010 mmol),  $\text{Et}_3\text{N}$  (58  $\mu\text{L}$ , 0.414 mmol), HOSA (47 mg, 0.414 mmol) and either 5 mol%, 50 mol%, or 100 mol% of 3,5-dimethylbenzyl picolinate (2.2 mg, 22 mg, or 44 mg, respectively, in separate reactions) were stirred at rt in HFIP (2 mL) for 24 h.

| Entry | Benzyl benzoate | 3,5-Dimethylbenzyl benzoate | Yield mixed aminobenzyl benzoate |
|-------|-----------------|-----------------------------|----------------------------------|
| 01    | 1 equiv         | 5 mol%                      | $\leq 5\%$                       |

|    |         |          |   |
|----|---------|----------|---|
| 02 | 1 equiv | 50 mol%  | 0 |
| 03 | 1 equiv | 100 mol% | 0 |

### Amination in presence of air

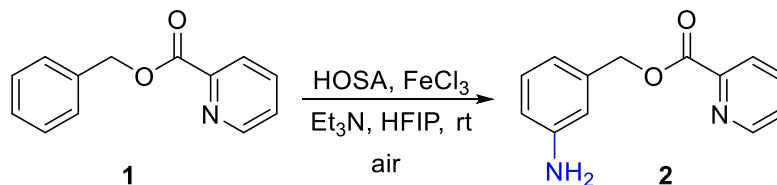

Following the general amination procedure, benzyl picolinate (**1**) (50 mg, 0.234 mmol), FeCl<sub>3</sub> (1.8 mg, 0.011 mmol), Et<sub>3</sub>N (65  $\mu$ L, 0.469 mmol), and HOSA (53 mg, 0.469 mmol) were stirred in presence of air (using drying tube filled with CaSO<sub>4</sub>) at rt in HFIP (2.3 mL) for 10 h. Chromatographic purification of the crude product afforded 3-aminobenzyl picolinate (**2**) (29 mg, 54%) as an oil and unreacted **1** (3 mg, 6%) as an oil.

### Amination in presence of TEMPO (free radical inhibitor)

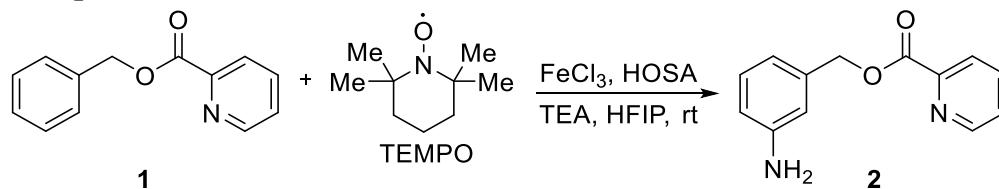

Following the general amination procedure, benzyl picolinate (**1**) (50 mg, 0.234 mmol), TEMPO (36.6 mg, 0.234 mmol), FeCl<sub>3</sub> (1.9 mg, 0.012 mmol), TEA (65  $\mu$ L, 0.469 mmol), and HOSA (53 mg, 0.469 mmol) were stirred at rt in HFIP (2.3 mL) for 23 h. Chromatographic purification of the crude product afforded *meta*-aminated **2** (22 mg, 41%) along with unreacted **1** (20 mg) as viscous oils.

### 1-Amino-2-((benzyloxy)carbonyl)pyridin-1-ium 2,4,6-trimethylbenzenesulfonate

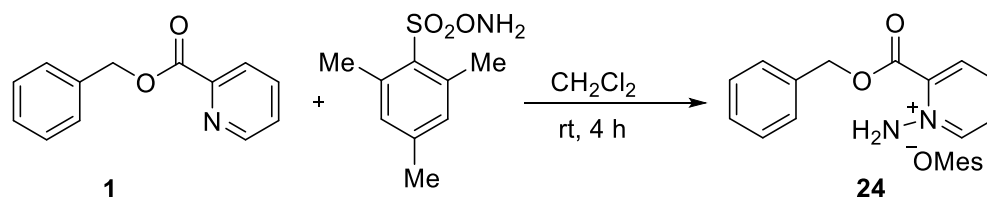

Following literature procedure,<sup>13</sup> *O*-mesitylenesulfonylhydroxylamine<sup>14</sup> (Mes-*O*-NH<sub>2</sub>) (100 mg, 0.469 mmol) was added to a stirring, 0 °C solution of benzyl picolinate (**1**) (100 mg, 0.469 mmol) in CH<sub>2</sub>Cl<sub>2</sub> (4.6 mL). The solution was warmed to rt and stirred. After 4 h, the reaction mixture was diluted with Et<sub>2</sub>O and the resulting precipitate was collected by filtration and dried *in vacuo* to give 1-amino-2-((benzyloxy)carbonyl)pyridin-1-ium 2,4,6-trimethylbenzenesulfonate (**24**) (176 mg, 88%) as a white solid, mp 123–124 °C. <sup>1</sup>H NMR (400 MHz, DMSO-*d*<sub>6</sub>)  $\delta$  8.98 (br s, 2H), 8.90 (d, *J* = 6.2 Hz, 1H), 8.47 (d, *J* = 9.3 Hz, 1H), 8.32 (t, *J* = 7.8 Hz, 1H), 8.19–8.12 (m, 1H), 7.53 (d, *J* = 6.7 Hz, 2H), 7.45–7.34 (m, 3H), 6.72 (s, 2H), 5.48 (s, 2H), 2.48 (s, 6H), 2.15 (s, 3H); <sup>13</sup>C NMR

(101 MHz, DMSO-*d*<sub>6</sub>)  $\delta$  159.50, 142.74, 139.93, 139.91, 136.24, 135.87, 135.48, 134.41, 130.68, 129.88, 129.85, 128.71, 128.60, 128.58, 68.85, 22.78, 20.30. Efforts to obtain a HRMS of **24** failed.

The <sup>1</sup>H/<sup>13</sup>C spectral values of the picolinate moiety of **24** were comparable with the aromatic portion of 1-amino-2-(ethoxycarbonyl)pyridinium 2,4,6-trimethylbenzenesulfonate<sup>13</sup> prepared from ethyl picolinate.

### 1-Amino-2-((benzyloxy)carbonyl)pyridin-1-ium 2,4,6-trimethylbenzenesulfonate as substrate

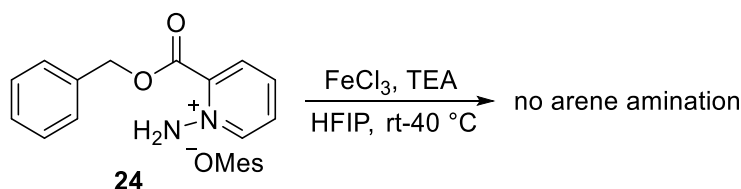

To a stirring, homogeneous, 0 °C solution of 1-amino-2-((benzyloxy)carbonyl)pyridin-1-ium 2,4,6-trimethylbenzenesulfonate (**24**) (50 mg, 0.116 mmol) in 1,1,1,3,3,3-hexafluoroisopropanol (1.1 mL) were added Et<sub>3</sub>N (16  $\mu$ L, 0.116 mmol) and FeCl<sub>3</sub> (0.9 mg, 0.005 mmol). After stirring for 12 h, the reaction was warmed to 40 °C for 12 h. No amination product was observed by TLC or NMR.

### 1-Amino-2-((benzyloxy)carbonyl)pyridin-1-ium 2,4,6-trimethylbenzenesulfonate as substrate in absence of base

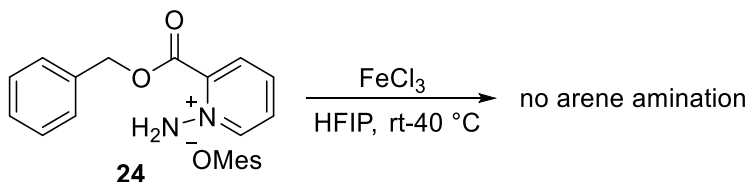

To a stirring, homogeneous, 0 °C solution of 1-amino-2-((benzyloxy)carbonyl)pyridin-1-ium 2,4,6-trimethylbenzenesulfonate (**24**) (50 mg, 0.116 mmol) in 1,1,1,3,3,3-hexafluoroisopropanol (1.1 mL) was added FeCl<sub>3</sub> (0.9 mg, 0.005 mmol). After stirring for 12 h, the reaction was warmed to 40 °C for 12 h. No amination product was observed by TLC or NMR.

### Attempted (Boc)<sub>2</sub>O *in situ* protection of aniline

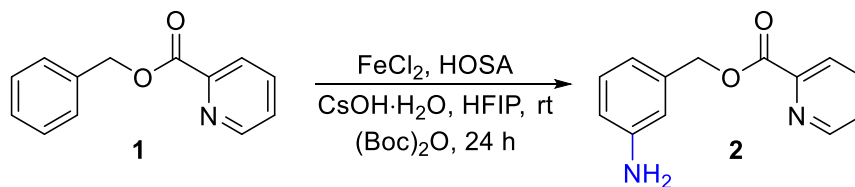

Benzyl picolinate (**1**) (50 mg, 0.234 mmol), (Boc)<sub>2</sub>O (51 mg, 0.234 mmol), FeCl<sub>2</sub> (2.9 mg, 0.023 mmol), CsOH·H<sub>2</sub>O (79 mg, 0.469 mmol), and HOSA (53 mg, 0.469 mmol) were stirred at rt in

HFIP (2.3 mL) for 24 h. Chromatographic purification of the crude product afforded *meta*-product (**2**) without N-Boc protection (16 mg, 30%) along with unreacted **1** (26 mg) as viscous oils.

### Attempted acetic anhydride *in situ* protection of aniline

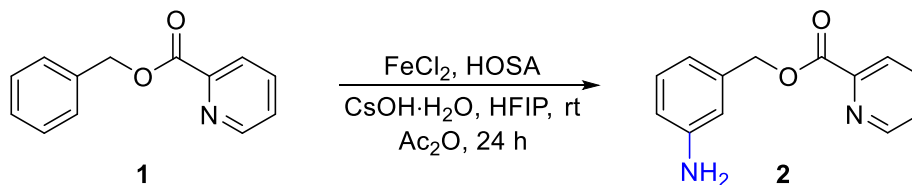

Benzyl picolinate (**1**) (50 mg, 0.234 mmol), Ac<sub>2</sub>O (22 μL, 0.234 mmol), FeCl<sub>2</sub> (2.9 mg, 0.023 mmol), CsOH·H<sub>2</sub>O (79 mg, 0.469 mmol), and HOSA (53 mg, 0.469 mmol) were stirred at rt in HFIP (2.3 mL) for 24 h. Chromatographic purification of the crude product afforded *meta*-product (**2**) without *N*-acetyl protection (16 mg, 30%) along with unreacted **1** (24 mg) as viscous oils.

### Benzyl picolinate as a substrate using Rh<sub>2</sub>(esp)<sub>2</sub>

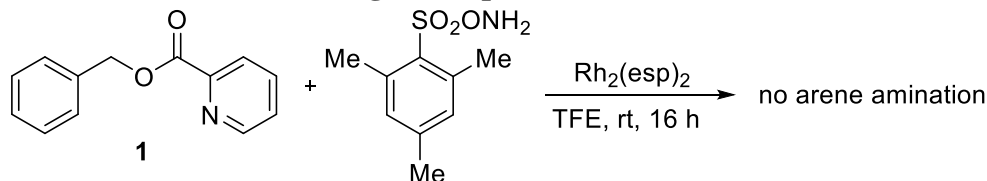

Following literature procedure,<sup>20</sup> benzyl picolinate (**1**) (50 mg, 0.234 mmol), Rh<sub>2</sub>(esp)<sub>2</sub> (3.5 mg, 0.004 mmol), *O*-mesitylenesulphonylhydroxylamine<sup>14</sup> (Mes-*O*-NH<sub>2</sub>) (100 mg, 0.469 mmol) were stirred at rt in TFE (2 mL) for 16 h. No amination product was observed by TLC or NMR.

### Benzyl picolinate as a substrate using Cu(OTf)<sub>2</sub>

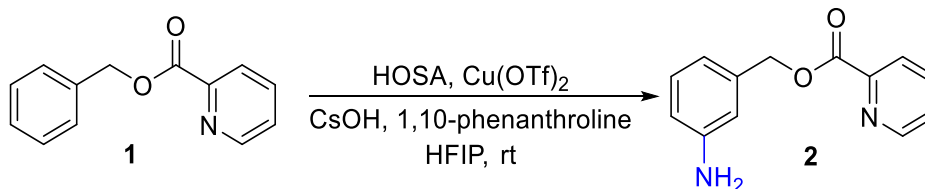

Following literature procedure,<sup>10</sup> benzyl picolinate (**1**) (50 mg, 0.234 mmol), Cu(OTf)<sub>2</sub> (8.3 mg, 0.023 mmol), CsOH·H<sub>2</sub>O (59 mg, 0.352 mmol), 1,10-phenanthroline (4.1 mg, 0.023 mmol), and HOSA (39 mg, 0.352 mmol) were stirred at rt in HFIP (2 mL) for 16 h. Chromatographic purification of the crude product afforded **2** (2 mg, 5%) along with unreacted **1** (38 mg, 76%) as viscous oils.

### Benzyl picolinate as a substrate using FeSO<sub>4</sub>·7H<sub>2</sub>O

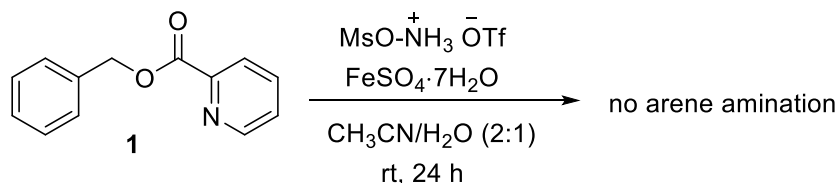

Following literature procedure,<sup>21</sup> benzyl picolinate (50 mg, 0.220 mmol), MsO-NH<sub>3</sub>OTf (70 mg, 0.330 mmol), and FeSO<sub>4</sub>·7H<sub>2</sub>O (3 mg, 0.011 mmol) were stirred in CH<sub>3</sub>CN/H<sub>2</sub>O (0.75 mL, 2:1 ratio) at rt for 24 h. No arene amination was noted by TLC or NMR.

### Benzyl acetate as substrate using Cu(OTf)<sub>2</sub>

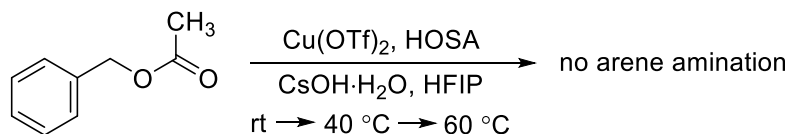

To a stirring, rt solution of phenethyl acetate<sup>15</sup> (50 mg, 0.333 mmol) in 1,1,1,3,3,3-hexafluoroisopropanol (3 mL) was added Cu(OTf)<sub>2</sub> (12 mg, 0.033 mmol). After 30 min, the reaction mixture was cooled to 0 °C and HOSA (75 mg, 0.666 mmol) and CsOH·H<sub>2</sub>O (112 mg, 0.666 mmol) were added sequentially. After stirring at rt for 12 h, the reaction was warmed at 40 °C for 5 h, and then at 60 °C for additional 5 h. No amination product was observed by TLC or NMR.

### Phenethyl benzoate as substrate using Cu(OTf)<sub>2</sub>

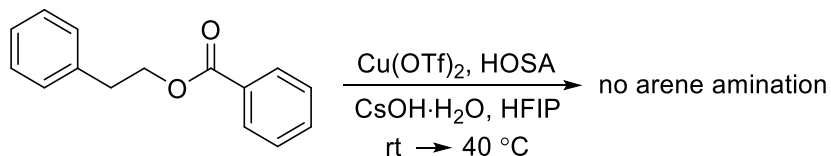

To a stirring, rt solution of phenethyl benzoate<sup>16</sup> (50 mg, 0.221 mmol) in 1,1,1,3,3,3-hexafluoroisopropanol (2.2 mL) was added Cu(OTf)<sub>2</sub> (7.9 mg, 0.022 mmol). After 30 min, the reaction mixture was cooled to 0 °C and HOSA (100 mg, 0.882 mmol) and CsOH·H<sub>2</sub>O (148 mg, 0.882 mmol) were added sequentially. After stirring at rt for 12 h, the reaction was warmed at 40 °C for 12 h. No amination product was observed by TLC or NMR.

### (1,1'-Biphenyl)-2-ylmethyl benzoate as substrate

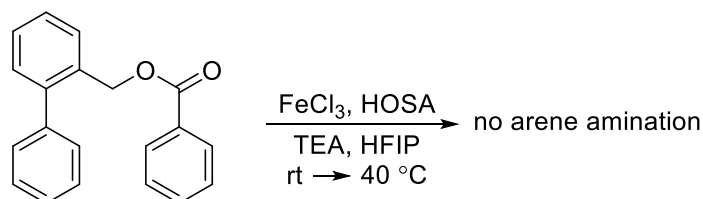

Following the general amination procedure, (1,1'-biphenyl)-2-ylmethyl benzoate<sup>17</sup> (50 mg, 0.173 mmol), FeCl<sub>3</sub> (1.4 mg, 0.008 mmol), TEA (48 µL, 0.347 mmol), and HOSA (39 mg, 0.347 mmol) were stirred at rt in HFIP (1.7 mL). After 12 h, the reaction was warmed to 40 °C for another 5 h. No amination product was observed by TLC or NMR.

### 2-Acetamidobenzyl picolinate standard



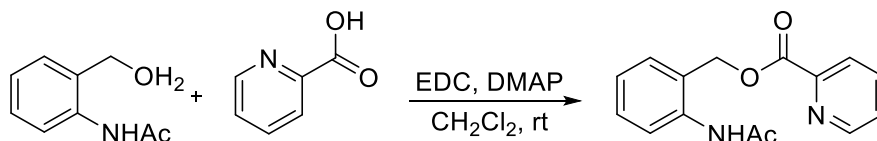

Following the general picolinate ester procedure, *N*-(2-(hydroxymethyl)phenyl)acetamide<sup>18</sup> (40 mg, 0.242 mmol), picolinic acid (35 mg, 0.290 mmol), EDCI (55 mg, 0.290 mmol) and DMAP (2.9 mg, 0.0242 mmol) were stirred at rt in CH<sub>2</sub>Cl<sub>2</sub> (5 mL) for 16 h. Chromatographic purification of the crude product afforded 2-acetamidobenzyl picolinate (57 mg, 89%) as a solid, mp 112-113 °C. TLC: *R*<sub>f</sub> ≈ 0.4 (70% EtOAc/hexanes). <sup>1</sup>H NMR (500 MHz, CDCl<sub>3</sub>) δ 9.13 (br s, 1H), 8.74 (d, *J* = 5.4 Hz, 1H), 8.13 (d, *J* = 7.8 Hz, 1H), 7.94 (d, *J* = 8.1 Hz, 1H), 7.85 (td, *J* = 7.7, 1.7 Hz, 1H), 7.52–7.48 (m, 1H), 7.46 (dd, *J* = 7.8, 1.5 Hz, 1H), 7.39–7.33 (m, 1H), 7.14 (td, *J* = 7.5, 1.2 Hz, 1H), 5.44 (s, 2H), 2.27 (s, 3H); <sup>13</sup>C NMR (101 MHz, CDCl<sub>3</sub>) δ 169.12, 165.92, 150.04, 147.46, 137.28, 137.02, 131.53, 130.12, 127.51, 125.88, 125.53, 124.97, 124.36, 65.20, 24.50. HRMS (ESI<sup>+</sup>) Calcd. for [C<sub>15</sub>H<sub>14</sub>N<sub>2</sub>O<sub>3</sub>+H]<sup>+</sup> 271.1077, Found 271.1085.

#### 4-Acetamidobenzyl picolinate standard

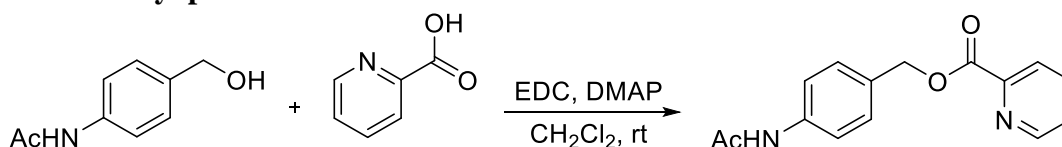

Following the general picolinate ester procedure, *N*-(4-(hydroxymethyl)phenyl)acetamide<sup>19</sup> (50 mg, 0.303 mmol), picolinic acid (44 mg, 0.363 mmol), EDCI (69 mg, 0.363 mmol) and DMAP (3.6 mg, 0.0303 mmol) were stirred at rt in CH<sub>2</sub>Cl<sub>2</sub> (6 mL) for 16 h. Chromatographic purification of the crude product afforded 4-acetamidobenzyl picolinate (70 mg, 85%) as a solid, mp 136-137 °C. TLC: *R*<sub>f</sub> ≈ 0.5 (70% EtOAc/hexanes). <sup>1</sup>H NMR (500 MHz, CDCl<sub>3</sub>) δ 8.72 (d, *J* = 4.6 Hz, 1H), 8.13 (d, *J* = 7.7 Hz, 2H), 7.83 (td, *J* = 7.8, 1.7 Hz, 1H), 7.52–7.44 (m, 3H), 7.36 (d, *J* = 8.5 Hz, 2H), 5.37 (s, 2H), 2.12 (s, 3H); <sup>13</sup>C NMR (101 MHz, CDCl<sub>3</sub>) δ 168.95, 165.04, 149.77, 147.91, 138.68, 137.29, 130.87, 129.62, 127.22, 125.44, 119.86, 67.40, 24.48. HRMS (ESI<sup>+</sup>) Calcd. for [C<sub>15</sub>H<sub>14</sub>N<sub>2</sub>O<sub>3</sub>+H]<sup>+</sup> 271.1077, Found 271.1083.

#### 3-Acetamidobenzyl picolinate standard

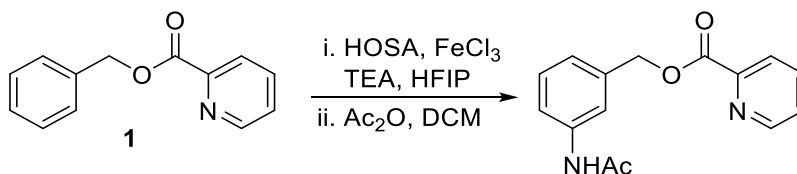

Following the general amination procedure, benzyl picolinate **1** (50 mg, 0.234 mmol), FeCl<sub>3</sub> (1.9 mg, 0.012 mmol), TEA (65 μL, 0.469 mmol), and HOSA (53 mg, 0.469 mmol) were stirred at rt in HFIP (2.3 mL) for 10 h. After isolation, the residue (55 mg) was acetylated without purification.

Acetic anhydride (0.22 mL, 2.412 mmol) was added to stirring solution of the above crude **1** (55 mg, 0.241 mmol) in dry CH<sub>2</sub>Cl<sub>2</sub> (5 mL). After 15 h, all volatiles were removed *in vacuo* and the crude residue was used for the HPLC study described below.

An analytical sample of N-acetyl **2** was prepared via TLC to afford a solid, mp 121-122 °C. TLC:  $R_f \approx 0.4$  (100% EtOAc).  $^1\text{H}$  NMR (500 MHz,  $\text{CDCl}_3$ )  $\delta$  8.76 (d,  $J = 4.1$  Hz, 1H), 8.15 (d,  $J = 7.9$  Hz, 1H), 7.85 (td,  $J = 7.7, 1.7$  Hz, 1H), 7.59–7.51 (m, 2H), 7.51–7.41 (m, 2H), 7.31 (t,  $J = 7.8$  Hz, 1H), 7.20 (d,  $J = 7.6$  Hz, 1H), 5.41 (s, 2H), 2.15 (s, 3H);  $^{13}\text{C}$  NMR (101 MHz,  $\text{CDCl}_3$ )  $\delta$  168.57, 164.88, 149.72, 147.76, 138.40, 137.15, 136.11, 129.17, 127.09, 125.36, 124.06, 119.86, 119.71, 67.39, 24.46. HRMS (ESI<sup>+</sup>) Calcd. for  $[\text{C}_{15}\text{H}_{14}\text{N}_2\text{O}_3 + \text{H}]^+$  271.1077, Found 271.1082.

### Catalyst Screen

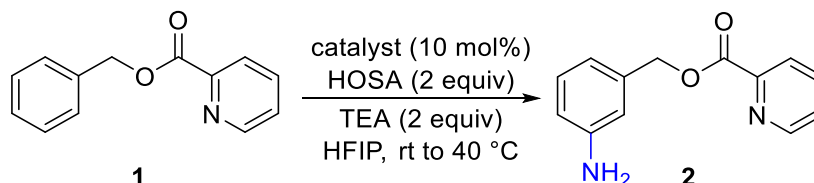

Under standardized reaction conditions, yields of  $\leq 5\%$  of *meta*-amine **2** from **1** were realized using  $\text{CuOAc}$ ,  $\text{CuCl}_2$ ,  $\text{Cu}(\text{OTf})_2$ ,  $\text{CuTC}$ ,  $\text{Cu}(\text{OAc})_2$ ,  $\text{CoBr}_2$ ,  $\text{Rh}_2(\text{esp})_2$ ,  $\text{Pd}(\text{OAc})_2$ , and  $\text{Ni}(\text{OAc})_2$ .

### Fe Catalyst Screen

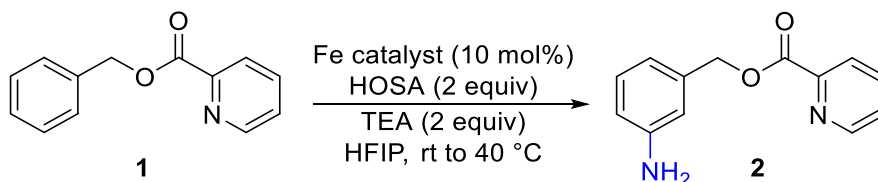

Under standardized reaction conditions, yields of 30-56% of amine **2** from **1** were realized using  $\text{Fe}(\text{acac})_3$ ,  $\text{Fe}(\text{OTf})_3$ ,  $\text{Fe}_2(\text{SO}_4)_3 \cdot x\text{H}_2\text{O}$ ,  $\text{FeCl}_3 \cdot 6\text{H}_2\text{O}$ ,  $\text{Fe}(\text{BF}_4)_2 \cdot 6\text{H}_2\text{O}$ ,  $\text{Fe}(\text{NO}_3)_3 \cdot 9\text{H}_2\text{O}$ ,  $\text{Fe}(\text{ClO}_4)_3 \cdot \text{H}_2\text{O}$ ,  $\text{FeBr}_3$ , and  $\text{FeF}_2$ .

### Reaction Optimization Studies

Table S1

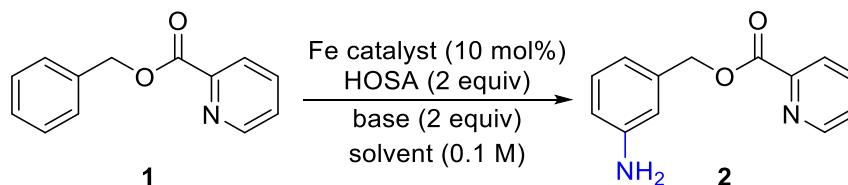

| Entry | Catalyst        | Base                                   | Temp (°C)/Time (h) | Solvent | Yield (%) |
|-------|-----------------|----------------------------------------|--------------------|---------|-----------|
| 1     | $\text{FeCl}_2$ | $\text{Et}_3\text{N}$                  | 23/16              | HFIP    | 66        |
| 2     | $\text{FeCl}_2$ | $i\text{Pr}_2\text{NEt}$               | 23/17              | HFIP    | 58        |
| 3     | $\text{FeCl}_2$ | imidazole                              | 23/40              | HFIP    | 25        |
| 4     | $\text{FeCl}_2$ | $\text{Et}_2\text{NH}$                 | 23/40              | HFIP    | 30        |
| 5     | $\text{FeCl}_2$ | pyridine                               | 23/26              | HFIP    | 40        |
| 6     | $\text{FeCl}_2$ | $\text{CsOH} \cdot \text{H}_2\text{O}$ | 23/26              | HFIP    | 15        |
| 7     | $\text{FeCl}_2$ | DBU                                    | 23/26              | HFIP    | 25        |
| 8     | $\text{FeCl}_2$ | DABCO                                  | 23/26              | HFIP    | 30        |
| 9     | $\text{FeCl}_2$ | quinclidine                            | 23/22              | HFIP    | 64        |
| 10    | $\text{FeCl}_2$ | DMAP                                   | 23/26              | HFIP    | 40        |

|           |                                  |                                 |              |                                             |             |
|-----------|----------------------------------|---------------------------------|--------------|---------------------------------------------|-------------|
| 11        | FeCl <sub>2</sub>                | 1,2,2,6,6-pentamethylpiperidine | 23/26        | HFIP                                        | 30          |
| 12        | FeCl <sub>2</sub>                | <i>N</i> -methylmorpholine      | 23/26        | HFIP                                        | 26          |
| 13        | FeCl <sub>2</sub>                | LiOH                            | 23/26        | HFIP                                        | 30          |
| 14        | FeCl <sub>2</sub>                | NaOH                            | 23/26        | HFIP                                        | no reaction |
| 15        | FeCl <sub>2</sub>                | Na <sub>2</sub> CO <sub>3</sub> | 23/26        | HFIP                                        | no reaction |
| 16        | FeCl <sub>2</sub>                | K <sub>2</sub> CO <sub>3</sub>  | 23/26        | HFIP                                        | 20          |
| 17        | FeCl <sub>3</sub>                | -                               | 23/24        | HFIP                                        | <10         |
| 18        | -                                | Et <sub>3</sub> N               | 23/24        | HFIP                                        | no reaction |
| 19        | FeCl <sub>3</sub>                | Et <sub>3</sub> N               | 40/24        | TFE                                         | 20          |
| 20        | FeCl <sub>3</sub>                | Et <sub>3</sub> N               | 40/24        | PhCF <sub>3</sub>                           | 0           |
| 21        | FeCl <sub>3</sub>                | Et <sub>3</sub> N               | 40/24        | DME                                         | 0           |
| 22        | FeCl <sub>3</sub>                | Et <sub>3</sub> N               | 40/24        | THF                                         | 0           |
| 23        | FeCl <sub>3</sub>                | Et <sub>3</sub> N               | 40/24        | CH <sub>2</sub> Cl <sub>2</sub> :HFIP (1:2) | 33          |
| 24        | FeCl <sub>3</sub>                | Et <sub>3</sub> N               | 23/16        | CHCl <sub>3</sub> :HFIP (1:2)               | 41          |
| 25        | FeCl <sub>3</sub>                | Et <sub>3</sub> N               | 23/16        | THF:HFIP (1:2)                              | 0           |
| 26        | FeCl <sub>3</sub>                | Et <sub>3</sub> N               | 23/16        | MeOH:HFIP (1:2)                             | <5          |
| 27        | FeCl <sub>3</sub>                | Et <sub>3</sub> N               | 23/16        | DMI:HFIP (1:2)                              | 0           |
| 28        | FeCl <sub>3</sub>                | Et <sub>3</sub> N               | 23/6         | HFIP                                        | 61          |
| <b>29</b> | <b>FeCl<sub>3</sub> (5 mol%)</b> | <b>Et<sub>3</sub>N</b>          | <b>23/10</b> | <b>HFIP</b>                                 | <b>72</b>   |
| 30        | FeCl <sub>3</sub> (3 mol%)       | Et <sub>3</sub> N               | 23/33        | HFIP                                        | 60          |
| 31        | FeCl <sub>2</sub>                | CsOH                            | 23/10        | HFIP + HOAc (1 to 4 equiv)                  | 32          |
| 32        | Fe(OAc) <sub>2</sub>             | Et <sub>3</sub> N               | 23/24        | HFIP                                        | 43          |
| 33        | Fe(acac) <sub>3</sub>            | Et <sub>3</sub> N               | 23/24        | HFIP                                        | 51          |

DMI = 1,3-dimethyl-2-imidazolidinone

## HOSA and TEA Screen

Table S2

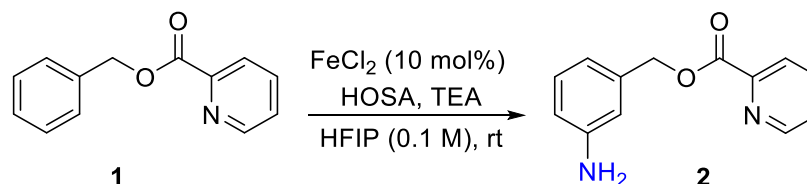

| Entry | TEA (equiv) | HOSA (equiv) | Time (h) | Yield (%) |
|-------|-------------|--------------|----------|-----------|
| 01    | 1.1         | 1.1          | 30       | 40        |
| 02    | 1.5         | 1.5          | 30       | 50        |
| 03    | 1           | 2            | 30       | 33        |
| 04    | 2           | 3            | 26       | 45        |
| 05    | 3           | 2            | 26       | 50        |
| 06    | 2           | 2            | 16       | 66        |

**Directing Group Screen**  
**Table S3**

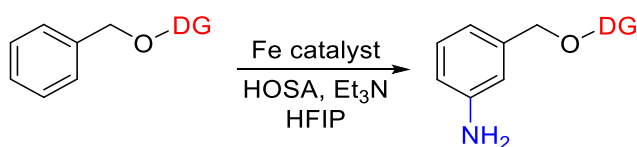

To a stirring, 0 °C solution of HOSA (0.4 mmol, 2 equiv) in 1,1,1,3,3,3-hexafluoroisopropanol (2 mL) was added Et<sub>3</sub>N (0.4 mmol, 2 equiv). After 15 min, the selected benzyl ester (0.2 mmol, 1 equiv) and anhydrous FeCl<sub>3</sub> (5-10 mol%) were added sequentially. Guided by TLC monitoring, reactions were continued until complete consumption of ester or the reaction appeared to have stopped (10-24 h). Then, the reaction mixture was diluted with CH<sub>2</sub>Cl<sub>2</sub> (10 mL), washed with saturated aqueous Na<sub>2</sub>CO<sub>3</sub> (10 mL), brine (10 mL), dried over anhydrous Na<sub>2</sub>SO<sub>4</sub>, and concentrated *in vacuo*. The crude residue was purified on a commercial pre-packed SiO<sub>2</sub> column using a medium pressure, automated chromatograph equipped with a UV detector and eluted with MeOH/CH<sub>2</sub>Cl<sub>2</sub> or EtOAc/hexanes to furnish *meta*-aminobenzyl ester in the indicated yield. No other regioisomeric aminobenzyl adducts were detected.

| Directing Group | Catalyst (mol%)             | Conditions  | Yield (%) <i>meta</i> -NH <sub>2</sub> |
|-----------------|-----------------------------|-------------|----------------------------------------|
|                 | FeCl <sub>3</sub> (5 mol%)  | rt, 10 h    | 72                                     |
|                 | FeCl <sub>3</sub> (10 mol%) | 40 °C, 24 h | 30                                     |

|                                                                                     |                             |             |                  |
|-------------------------------------------------------------------------------------|-----------------------------|-------------|------------------|
| 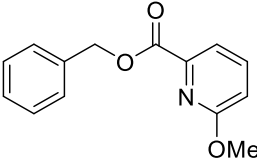   | FeCl <sub>3</sub> (10 mol%) | 40 °C, 24 h | 35               |
|    | FeCl <sub>3</sub> (10 mol%) | rt, 3 h     | ester hydrolysis |
|    | FeCl <sub>2</sub> (10 mol%) | 40 °C, 24 h | no reaction      |
|    | FeCl <sub>3</sub> (10 mol%) | 40 °C, 24 h | no reaction      |
|    | FeCl <sub>3</sub> (10 mol%) | rt, 24 h    | 13               |
|   | FeCl <sub>3</sub> (10 mol%) | 40 °C, 24 h | 5                |
|  | FeCl <sub>3</sub> (10 mol%) | rt, 26 h    | 35               |
|  | FeCl <sub>2</sub> (10 mol%) | 40 °C, 24 h | no reaction      |
|  | FeCl <sub>3</sub> (10 mol%) | rt, 24 h    | 10               |
|  | FeCl <sub>3</sub> (10 mol%) | 40 °C, 24 h | no reaction      |
|  | FeCl <sub>3</sub> (10 mol%) | 40 °C, 24 h | no reaction      |
|  | FeCl <sub>3</sub> (5 mol%)  | rt, 24 h    | 72               |

|                                                                                                                                                |                            |          |                            |
|------------------------------------------------------------------------------------------------------------------------------------------------|----------------------------|----------|----------------------------|
| 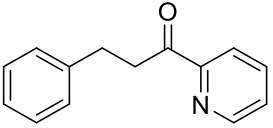<br><i>Prep: J. Org. Chem.</i><br><b>2014</b> , 79, 5852–5857 | FeCl <sub>3</sub> (5 mol%) | rt, 24 h | <10<br>mixture of products |
| <br><i>Prep: J. Med. Chem.</i><br><b>2017</b> , 60, 4693–4713 | FeCl <sub>3</sub> (5 mol%) | rt, 24 h | ether cleavage             |
| <br><i>Prep: Chem. Med. Chem</i><br><b>2014</b> , 9, 177–188. | FeCl <sub>3</sub> (5 mol%) | rt, 24 h | <10<br>mixture of products |

### Kinetic Isotope Study

#### Preparation of 2,3,4,5,6-benzyl-*d*<sub>5</sub> picolinate

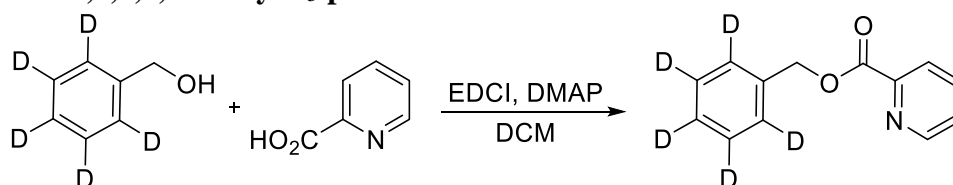

EDCI (203 mg, 1.062 mmol) was added to a 0 °C solution of benzyl alcohol-*d*<sub>5</sub> (0.1 g, 0.885 mmol, 98 atom % D) and picolinic acid (119 mg, 0.973 mmol) in CH<sub>2</sub>Cl<sub>2</sub> (10 mL) followed by DMAP (11 mg, 0.088 mmol). After stirring at rt for 20 h, the reaction mixture was concentrated in *vacuo*. The residue was purified using a commercial pre-packed SiO<sub>2</sub> column on a medium pressure, automated chromatograph using 40% EtOAc/hexanes to give benzyl picolinate-*d*<sub>5</sub> as a viscous oil (160 mg, 83%). TLC: *R*<sub>f</sub> ≈ 0.4 (70% EtOAc/hexanes). <sup>1</sup>H NMR (400 MHz, CDCl<sub>3</sub>) δ 8.76 (d, *J* = 4.6 Hz, 1H), 8.13 (d, *J* = 7.8 Hz, 1H), 7.82 (td, *J* = 7.8, 1.7 Hz, 1H), 7.52–7.43 (m, 1H), 5.46 (s, 2H); <sup>13</sup>C NMR (101 MHz, CDCl<sub>3</sub>) δ 164.99, 149.92, 147.96, 136.94, 135.39, 128.34 (d), 128.09 (d), 127.85 (d), 126.91, 125.24, 77.32, 77.00, 76.68, 67.43. HRMS (ESI<sup>+</sup>) Calcd. for [C<sub>13</sub>H<sub>6</sub>D<sub>5</sub>NO<sub>2</sub>+H]<sup>+</sup> 219.1182, Found 219.1190.

#### Kinetic isotope study of *meta*-amination reaction

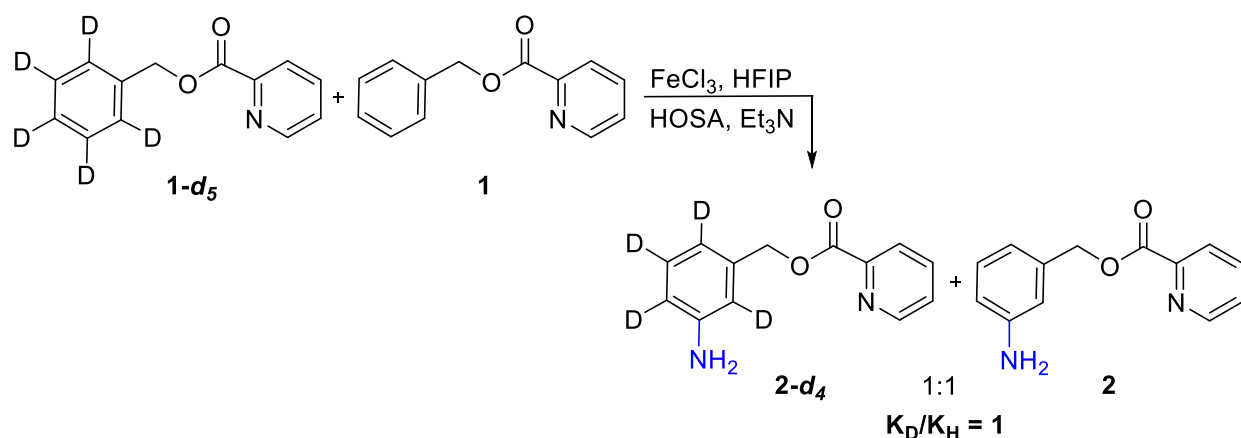

Following the general amination procedure, benzyl picolinate (**1**) (50 mg, 0.234 mmol), benzyl picolinate-*d*<sub>5</sub> (**1-d<sub>5</sub>**) (51 mg, 0.234 mmol), FeCl<sub>3</sub> (1.9 mg, 0.011 mmol), TEA (32.7 μL, 0.234 mmol), and HOSA (27 mg, 0.234 mmol) were stirred at rt in HFIP (2.3 mL) for 9 h. The residue was purified using a commercial pre-packed SiO<sub>2</sub> column on a medium pressure, automated chromatograph using a gradient of 1-3% MeOH/CH<sub>2</sub>Cl<sub>2</sub> to obtain *meta*-products **2** and **2-d<sub>4</sub>** (22 mg, 20%,  $K_H/K_D$  1:1 ratio) with unreacted **1** and **1-d<sub>5</sub>** (64 mg) as viscous oils. <sup>1</sup>H NMR (400 MHz, CDCl<sub>3</sub>) δ 8.76 (d, *J* = 4.9 Hz, 2H), 8.19–8.07 (m, 2H), 7.82 (td, *J* = 7.8, 1.8 Hz, 2H), 7.50–7.42 (m, 2H), 7.14 (t, *J* = 7.8 Hz, 1H), 6.85 (d, *J* = 7.6 Hz, 1H), 6.81–6.76 (m, 1H), 6.66–6.60 (m, 1H), 5.39–5.31 (s, 4H), 3.72 (br s, 4H); <sup>13</sup>C NMR (101 MHz, CDCl<sub>3</sub>) δ 165.01, 149.91, 148.01, 146.67, 146.54, 136.98, 136.73, 136.56, 132.12, 132.02, 129.52, 129.46, 128.85, 128.56, 128.44, 126.92, 125.28, 118.60, 115.21, 115.09, 114.99, 114.71, 114.47, 67.54, 67.47. HRMS (ESI<sup>+</sup>) Calcd. for [C<sub>13</sub>H<sub>8</sub>D<sub>4</sub>N<sub>2</sub>O<sub>2</sub>+H]<sup>+</sup> 233.1228, Found 233.1224.

## References

- Lu, B.; Zhu, F.; Sun, H.-M.; Shen, Q. Esterification of the Primary Benzylic C–H Bonds with Carboxylic Acids Catalyzed by Ionic Iron(III) Complexes Containing an Imidazolium Cation. *Org. Lett.* **2017**, *19*, 1132–1135.
- Mahajani, N. S.; Meador, R. I. L.; Smith, T. J.; Canarelli, S. E.; Adhikari, A. A.; Shah, J. P.; Russo, C. M.; Wallach, D. R.; Howard, K. T.; Millimaci, A. M.; Chisholm, J. D. Ester Formation via Symbiotic Activation Utilizing Trichloroacetimidate Electrophiles *J. Org. Chem.* **2019**, *84*, 7871–7882.
- Feng, J.; Liang, S.; Chen, S.-Y.; Zhang, J.; Fu, S.-S.; Yua, X.-Q. A Metal-Free Oxidative Esterification of the Benzylic C–H Bond. *Adv. Synth. Catal.* **2012**, *354*, 1287–1292.
- Lai, L.; Li, A.-N.; Zhou, J.; Guo, Y.; Lin, L.; Chena, W.; Wang, R. Mg(OMe)<sub>2</sub> Promoted Allylic Isomerization of γ-Hydroxy-α,β-alkenoic Esters to Synthesize γ-Ketone Esters. *Org. Biomol. Chem.* **2017**, *15*, 2185–2190.
- Goldfarb, D. S. Method Using Lifespan-Altering Compounds for Altering the Lifespan of Eukaryotic Organisms, and Screening for Such Compounds. U.S. Pat. Appl. Publ. 2009, US 20090163545 A1 20090625.
- Bao, Y.-S.; Chen, C.-Y.; Huang, Z.-Z. 5,5'-Dimethyl-3,3'-azoisoxazole as a New Heterogeneous Azo Reagent for Esterification of Phenols and Selective Esterification of Benzylic Alcohols Under Mitsunobu Conditions. *J. Org. Chem.* **2012**, *77*, 8344–8349.

7. Iranpoor, N.; Firouzabadi, H.; Khalili, D. Transesterification for Synthesis of Carboxylates Using Aldehydes as Acyl Donors via C-H and C-O Bond Activations *Org. Biomol. Chem.* **2010**, *8*, 4436–4443.
8. Magens, S.; Plietker, B. Nucleophilic Iron Catalysis in Transesterifications: Scope and Limitations. *J. Org. Chem.* **2010**, *75*, 3715–3721.
9. Yan, X-B.; Li, C.-L.; Jin, W.-J.; Guo, P.; Shu, X-Z. Reductive Coupling of Benzyl Oxalates with Highly Functionalized Alkyl Bromides by Nickel Catalysis. *Chem. Sci.* **2018**, *9*, 4529–4534.
10. Munnuri, S.; Anugu, R. R.; Falck, J. R. Cu(II)-Mediated *N*-H and *N*-Alkyl Aryl Amination and Olefin Aziridination. *Org. Lett.* **2019**, *216*, 1926–1929.
11. Segovia, C.; Fache, F.; Pelotier, B.; Piva, O. Access to Polyfluorinated Tetrahydropyranyl Amides via Prins-Ritter Cyclization Under Green Conditions. *Chemistry Select.* **2019**, *4*, 3191–3194.
12. Bao, H.; Li, Y.; Liu, L.; Ai, Y.; Zhou, J.; Qi, L.; Jiang, R.; Hu, Z.; Wang, J.; Sun, H.; Liang, Q. Ultrafine FeCu Alloy Nanoparticles Magnetically Immobilized in Amine-Rich Silica Spheres for Dehalogenation-Proof Hydrogenation of Nitroarenes. *Chem. Eur. J.* **2018**, *24*, 14418–14424.
13. Nakatake, D.; Yazaki, R.; Matsushima, Y.; Ohshima, T. Transesterification Reactions Catalyzed by Recyclable Heterogeneous Zinc/Imidazole Catalyst. *Adv. Synth. Catal.* **2016**, *358*, 2569–2574.
14. Mendiola, J.; Rincon, J. A.; Mateos, C.; Soriano, J. F.; Frutos, O. D.; Niemeier, J. K.; Davis, E. M. Preparation, Use, and Safety of *O*-Mesitylenesulfonylhydroxylamine. *Org. Process Res. Dev.* **2009**, *13*, 263–267.
15. Jones, P.; Altamura, S.; Boueres, J.; Ferrigno, F.; Fonsi, M.; Giomini, C.; Lamartina, S.; Monteagudo, E.; Ontoria, J. M.; Orsale, M. V.; Palumbi, M. C.; Pesci, S.; Roscilli, G.; Scarpelli, R.; Schultz-Fademrecht, C.; Toniatti, C.; Rowley, M. Discovery of 2-{4-[(3*S*)-Piperidin-3-yl]phenyl}-2*H*-indazole-7-carboxamide (MK-4827): A Novel Oral Poly(ADP-ribose)polymerase (PARP) Inhibitor Efficacious in BRCA-1 and -2 Mutant Tumors. *J. Med. Chem.* **2009**, *52*, 7170–7185.
16. Chen, C-T.; Munot, Y. S. Direct Atom-Efficient Esterification Between Carboxylic Acids and Alcohols Catalyzed by Amphoteric, Water-Tolerant TiO(acac)<sub>2</sub>. *J. Org. Chem.* **2005**, *70*, 8625–8627.
17. Hirano, M.; Kawazu, S.; Komine, N. Direct Access to Fluorene by Successive C–O/C–H Bond Activations of 2-Phenylbenzyl Ester. *Organometallics*. **2014**, *33*, 1921–1924 (2014).
18. Li, P.; Huang, Y.; Hu, X.; Dong, X.-Q.; Zhang, X. Access to Chiral Seven-Member Cyclic Amines via Rh-Catalyzed Asymmetric Hydrogenation. *Org. Lett.* **2017**, *19*, 3855–3858.
19. Ishikawa, F.; Shirahashi, M.; Hayakawa, H.; Yamaguchi, A.; Hirokawa, T.; Tsumuraya, T.; Fujii, I. Site-Directed Chemical Mutations on Abzymes: Large Rate Accelerations in the Catalysis by Exchanging the Functionalized Small Nonprotein Components. *ACS Chem. Biol.* **2016**, *11*, 2803–2811.
20. Paudyal, M. P.; Adebisin, A. M.; Burt, S. R.; Ess, D. H.; Ma, Z.; Kürti, L.; Falck, J. R. Dirhodium Catalyzed C-H Arene Amination Using Hydroxylamines. *Science* **2016**, *353*, 1144–1147.
21. Legnani, L.; Prina, G.; Morandi, B. *ACS Catal.* **2016**, *6*, 8162–8165.



# $^1\text{H}/^{13}\text{C}$ NMR Spectra

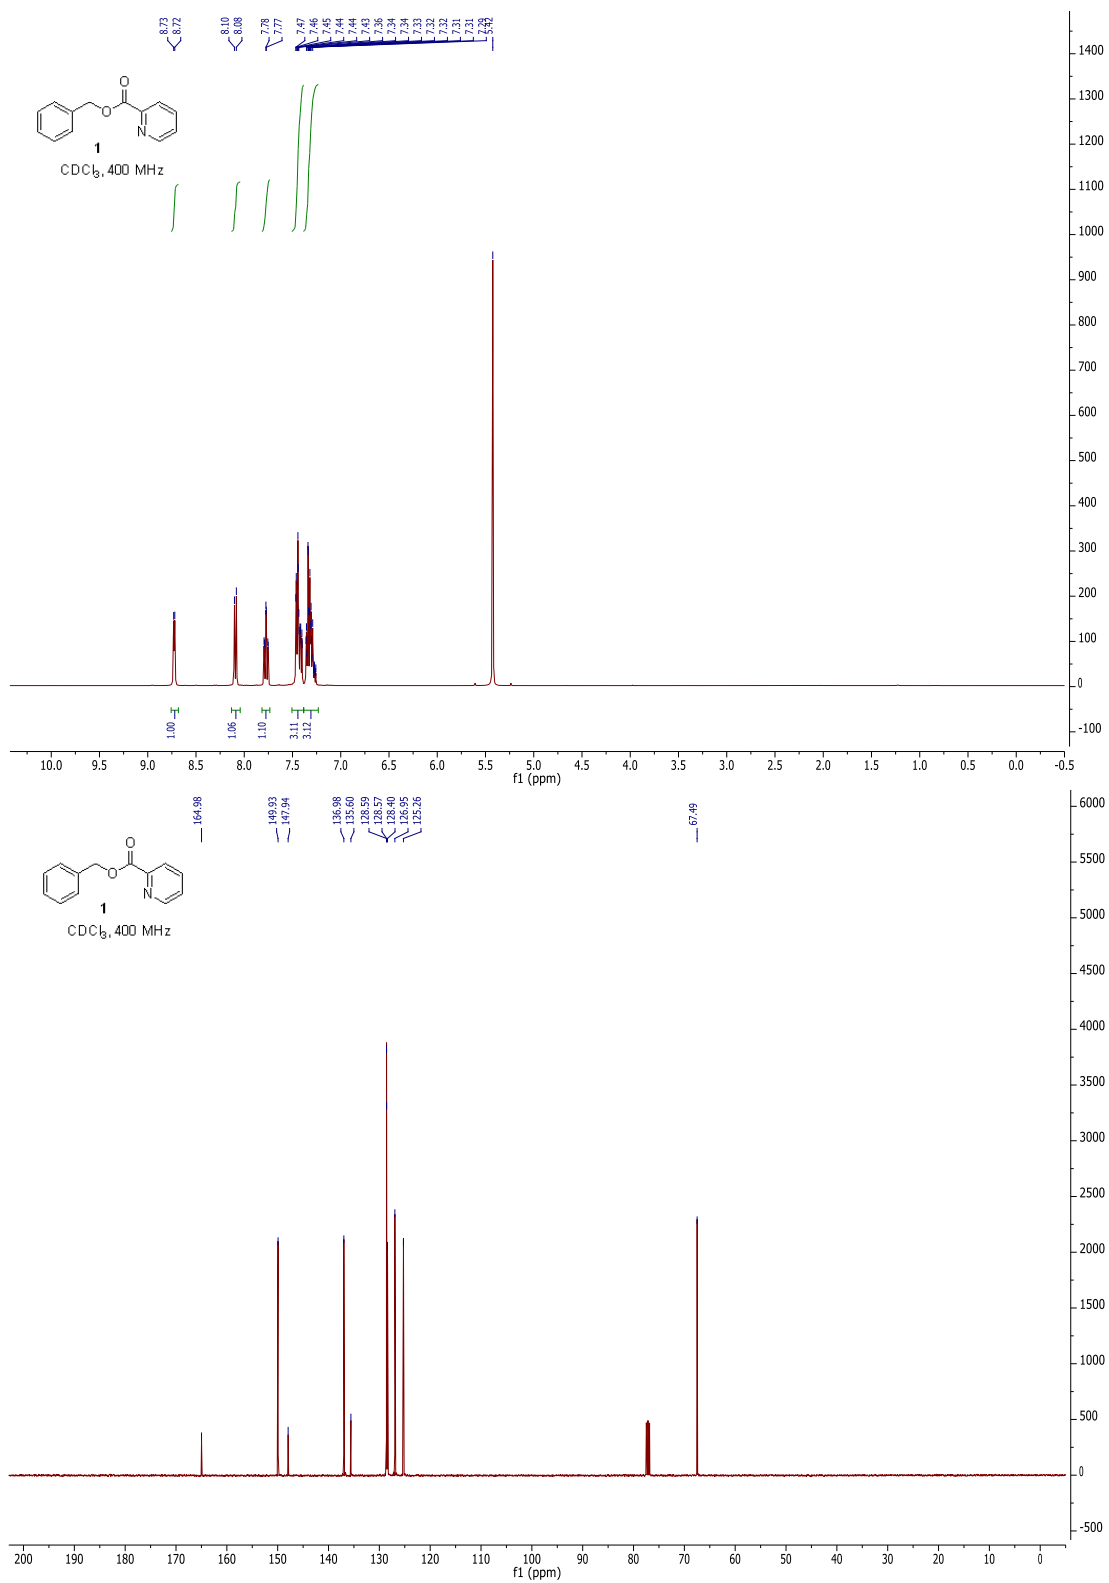

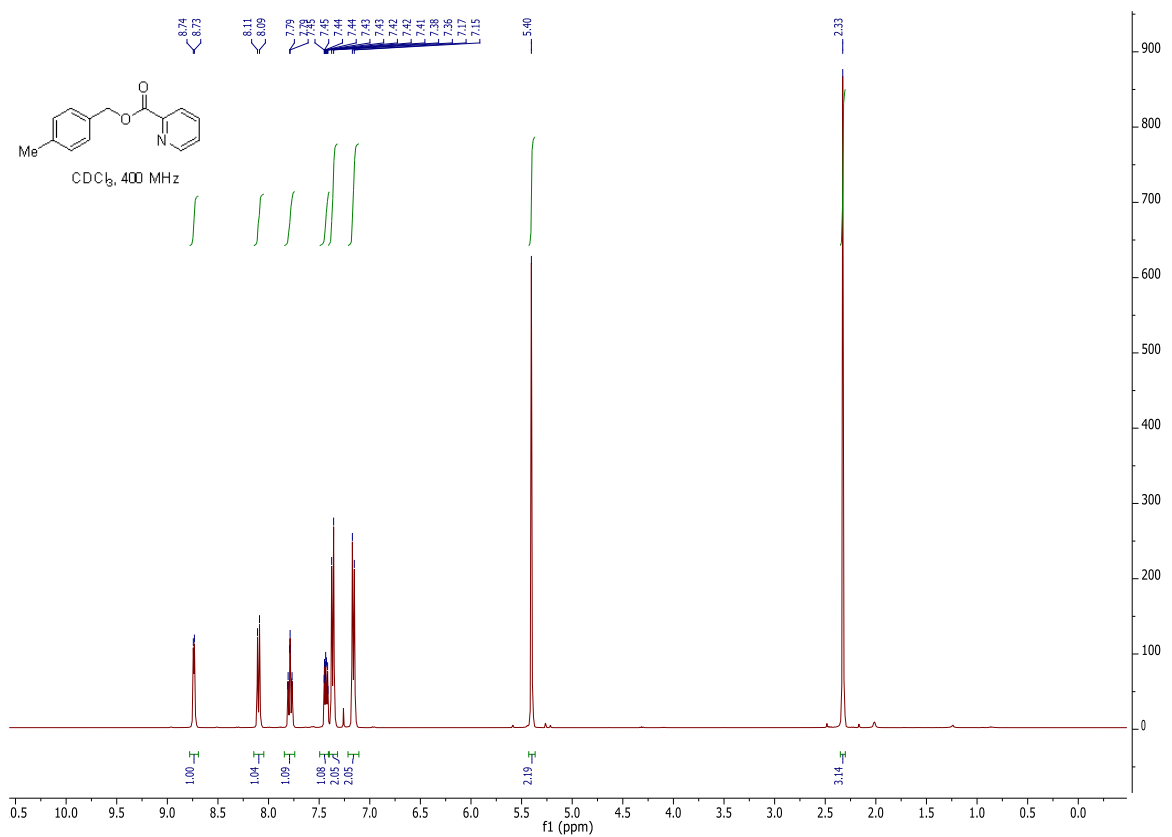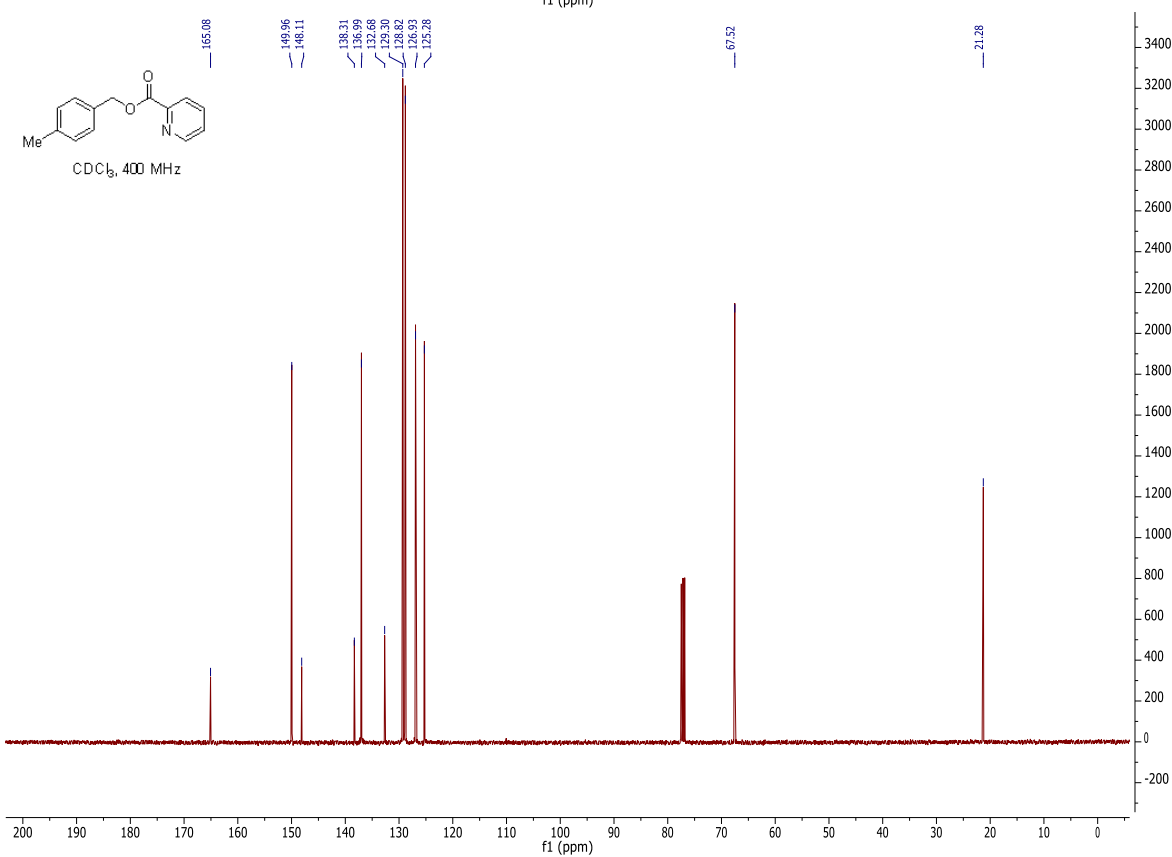

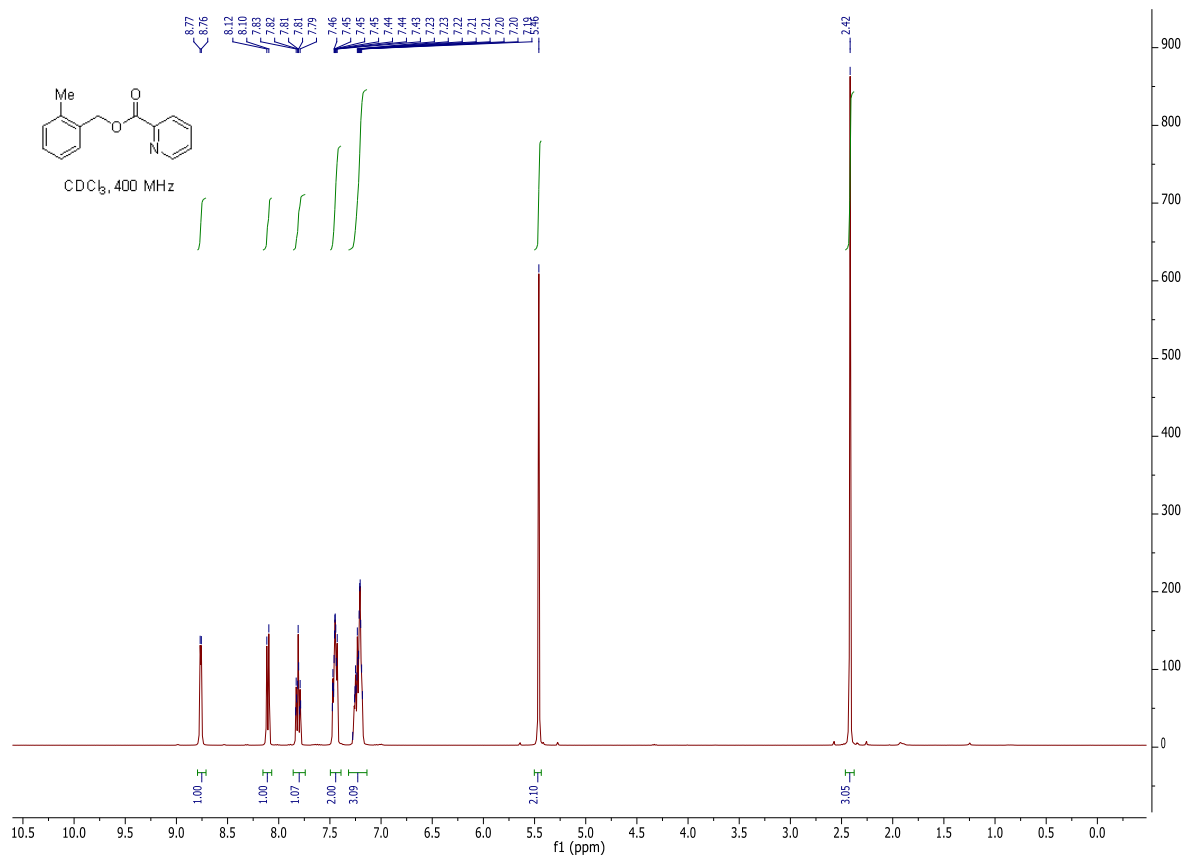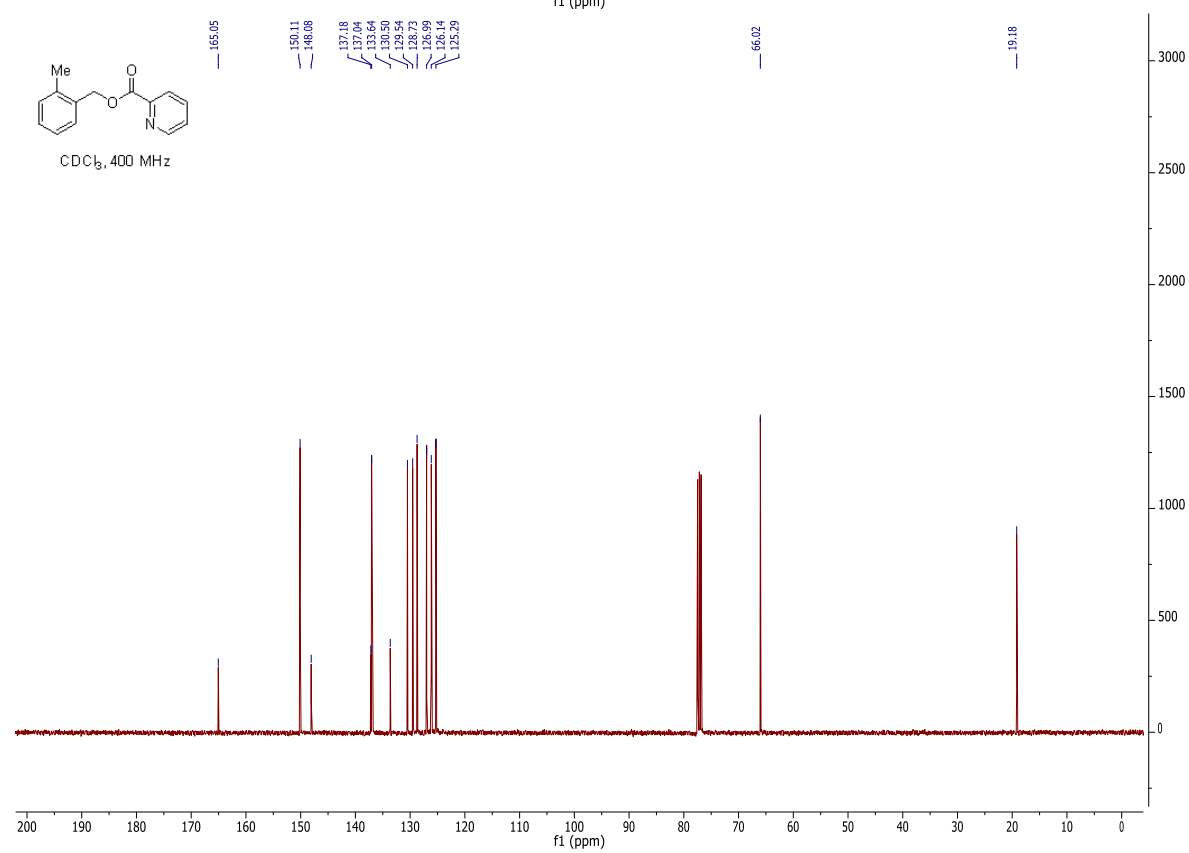

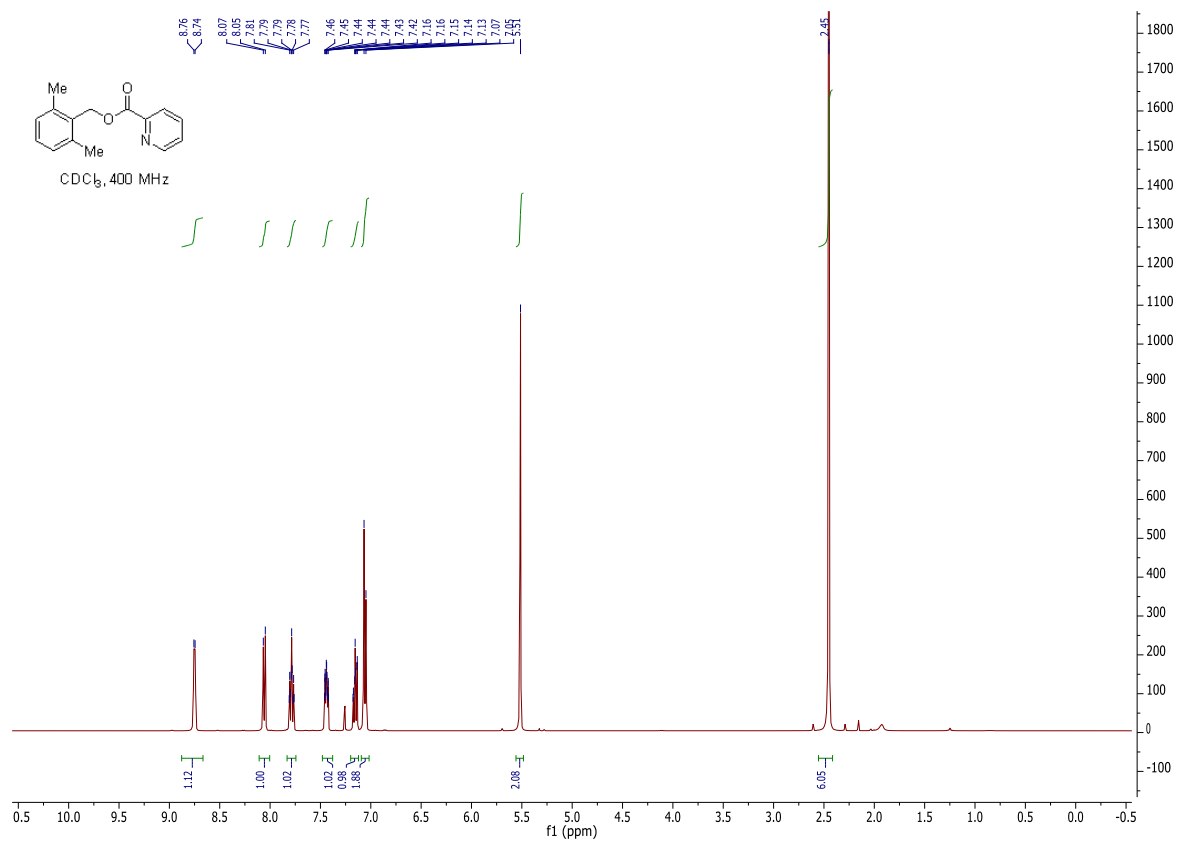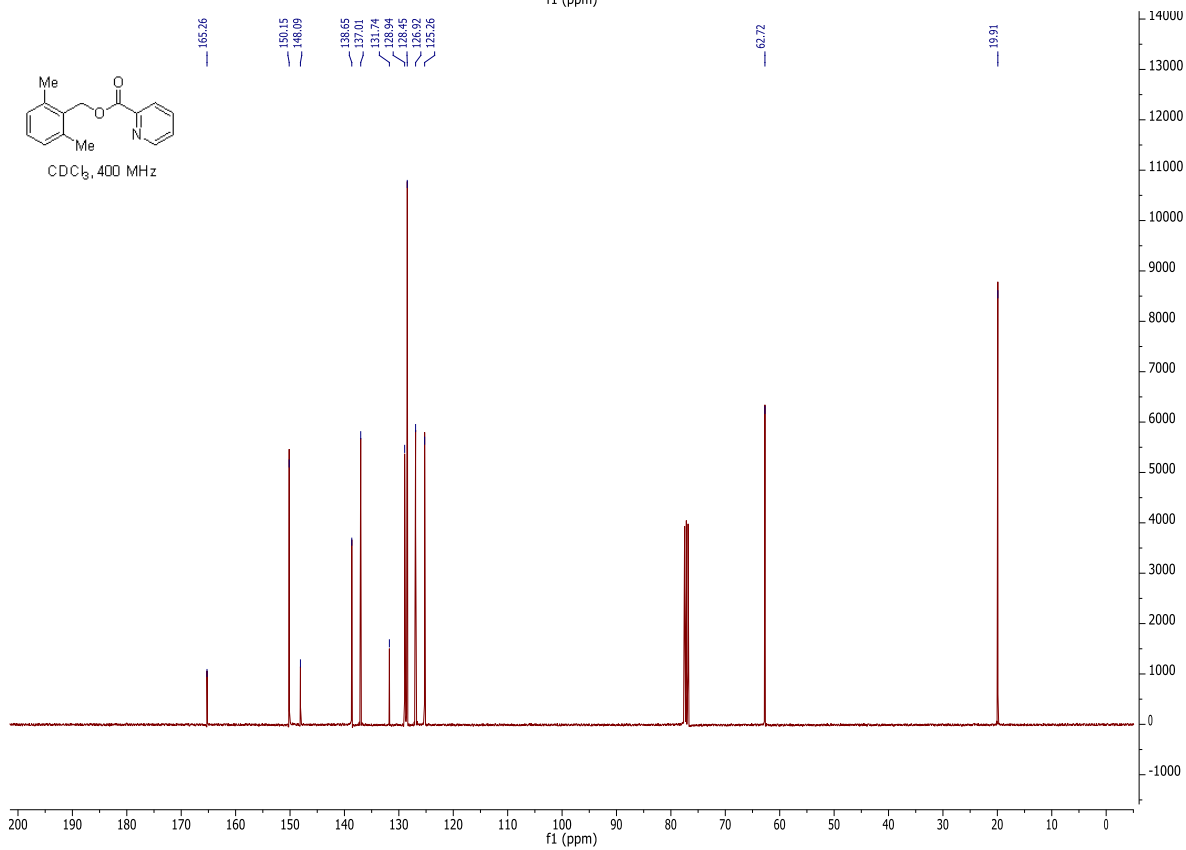

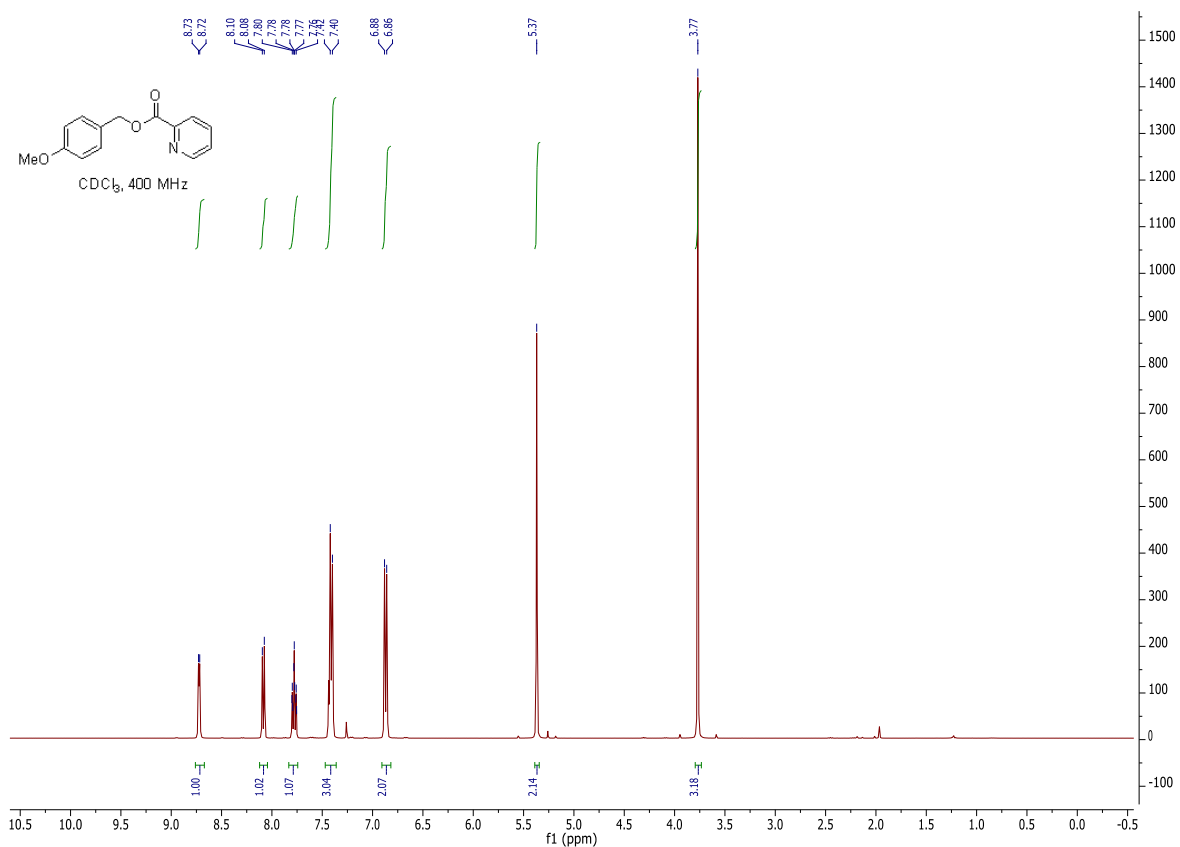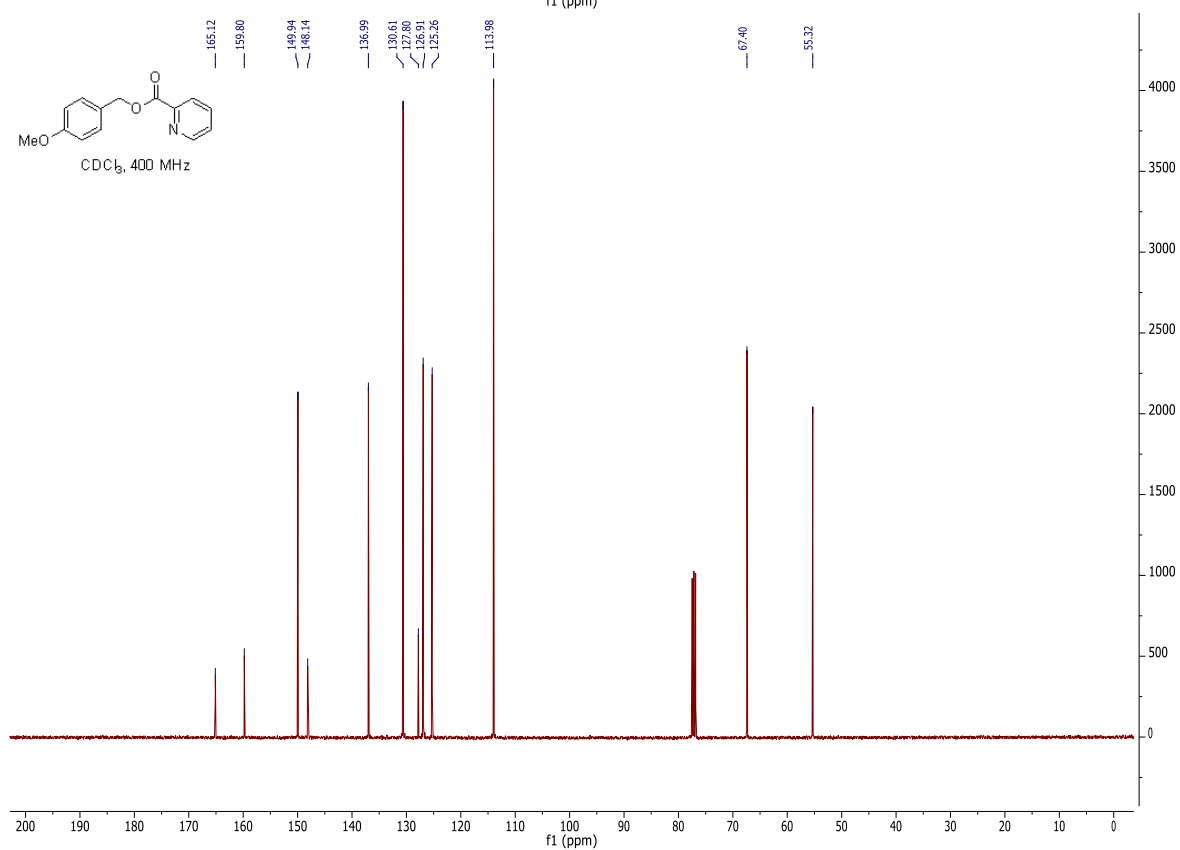

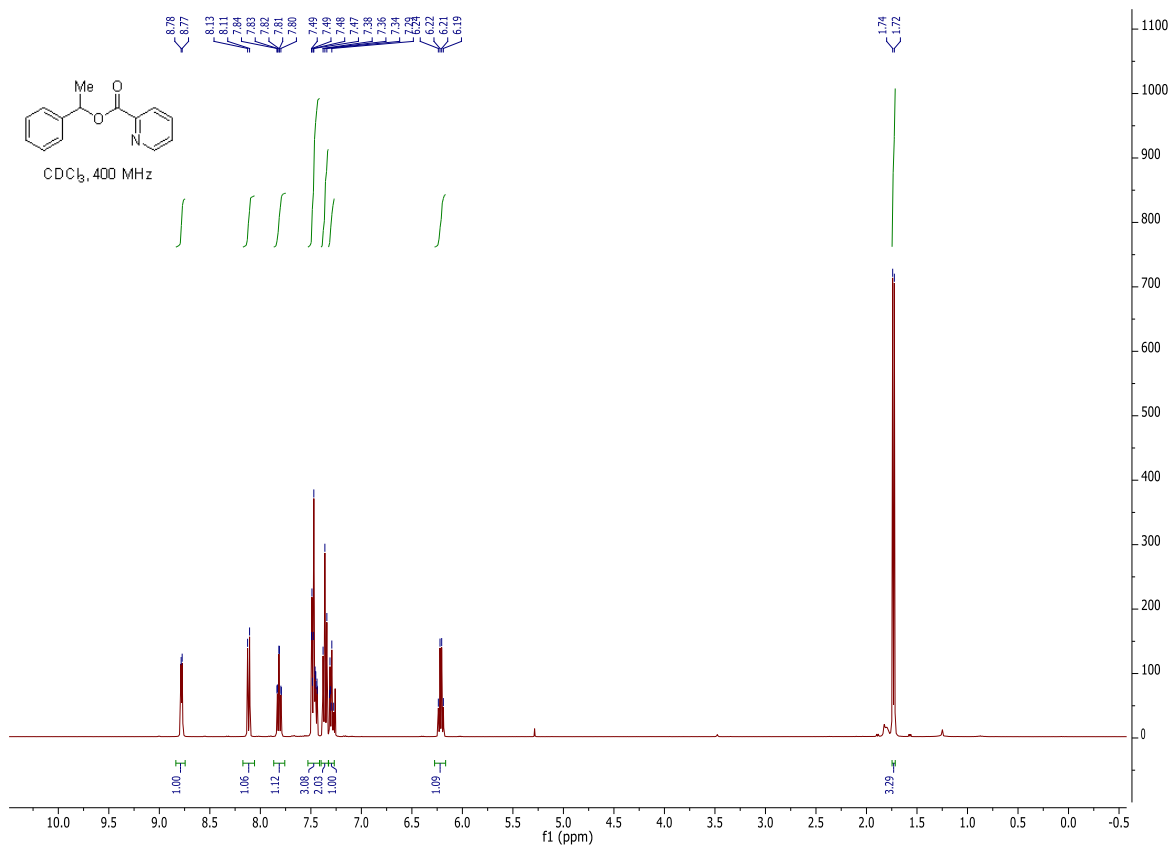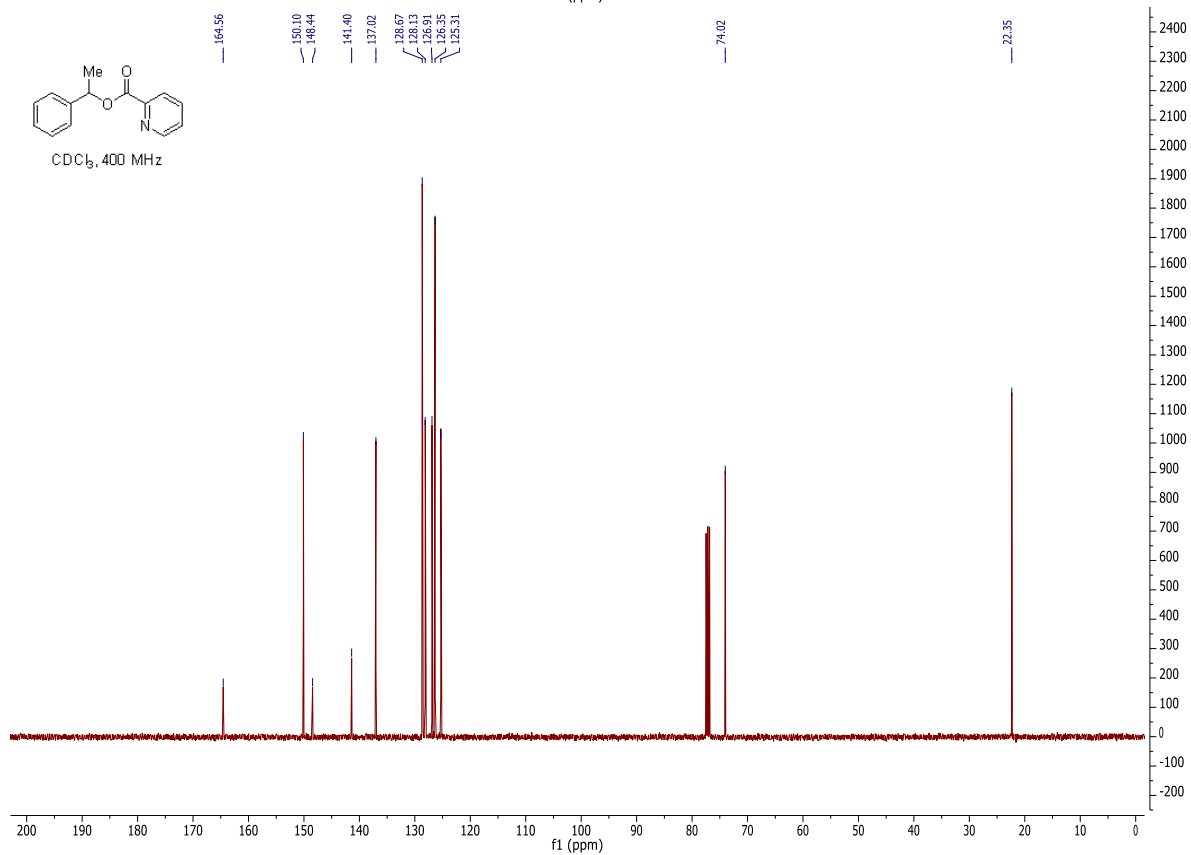

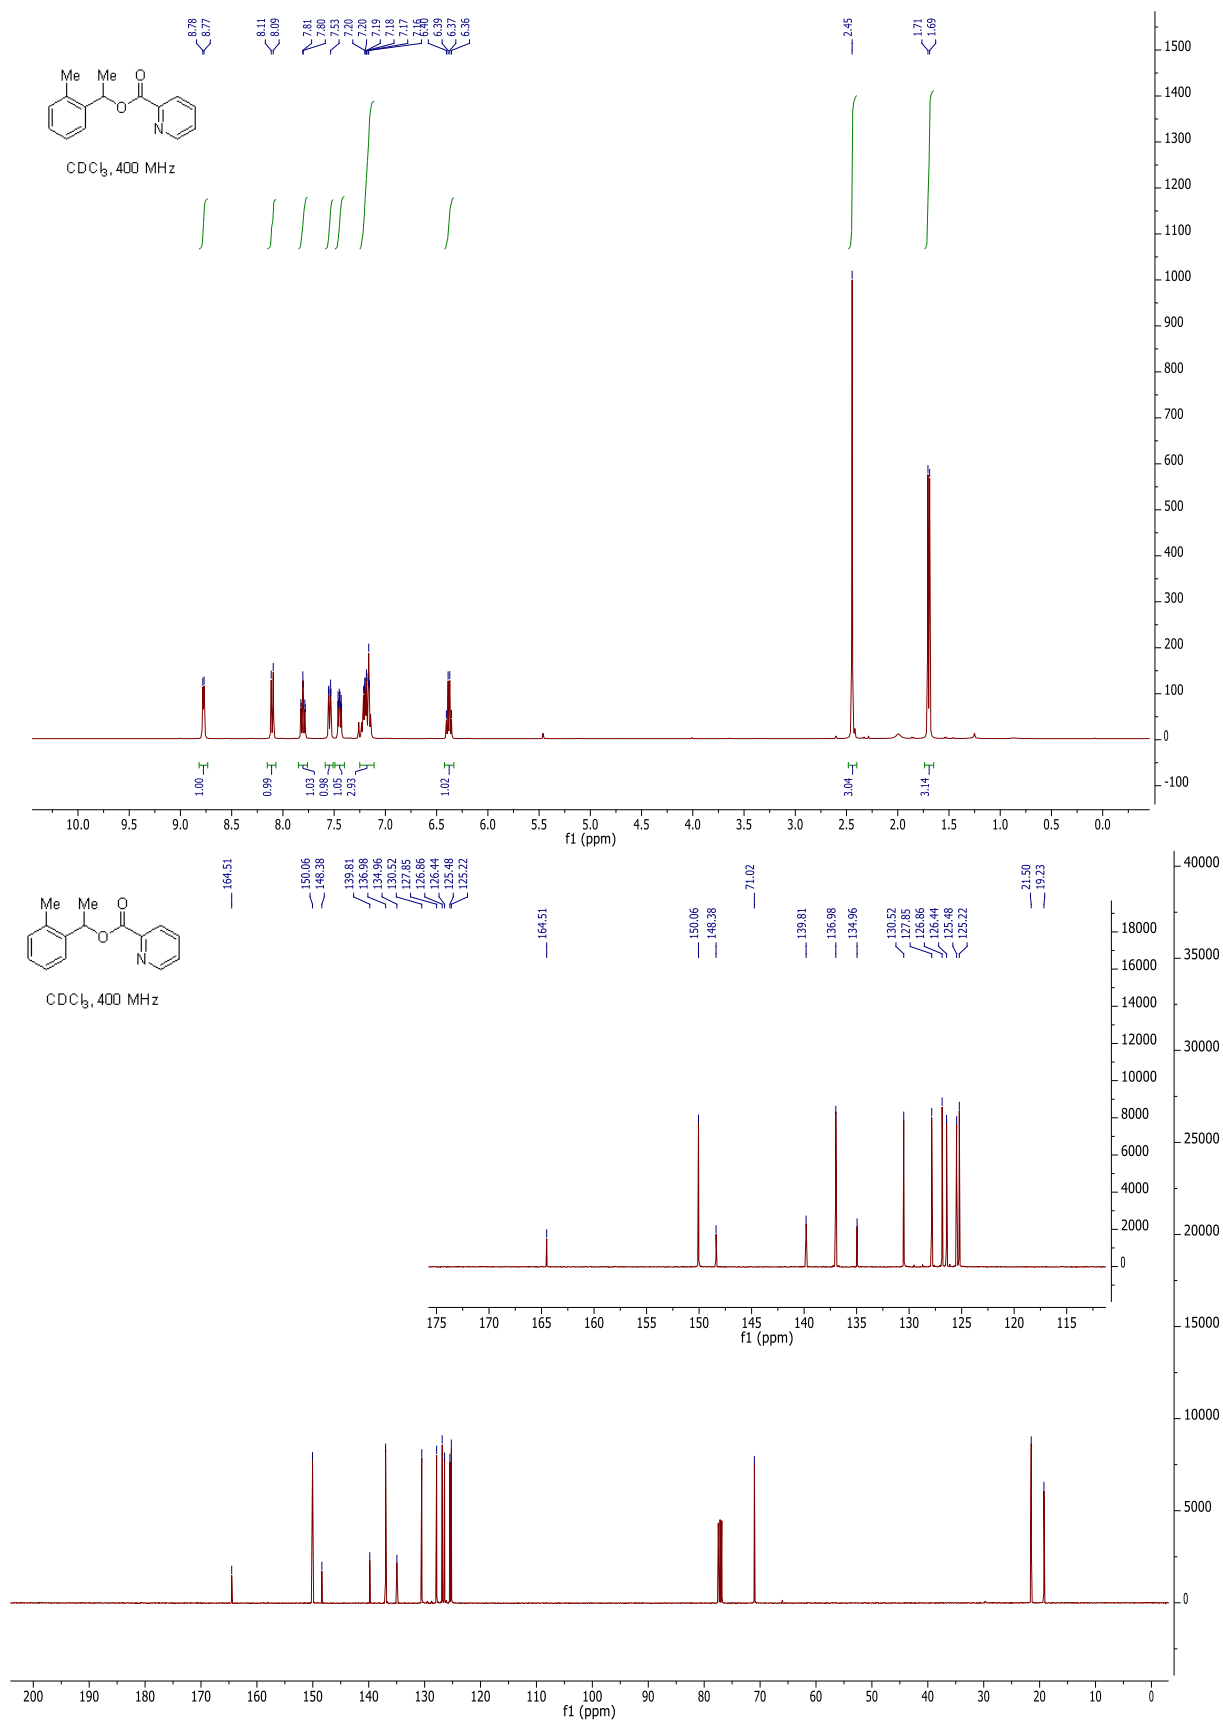

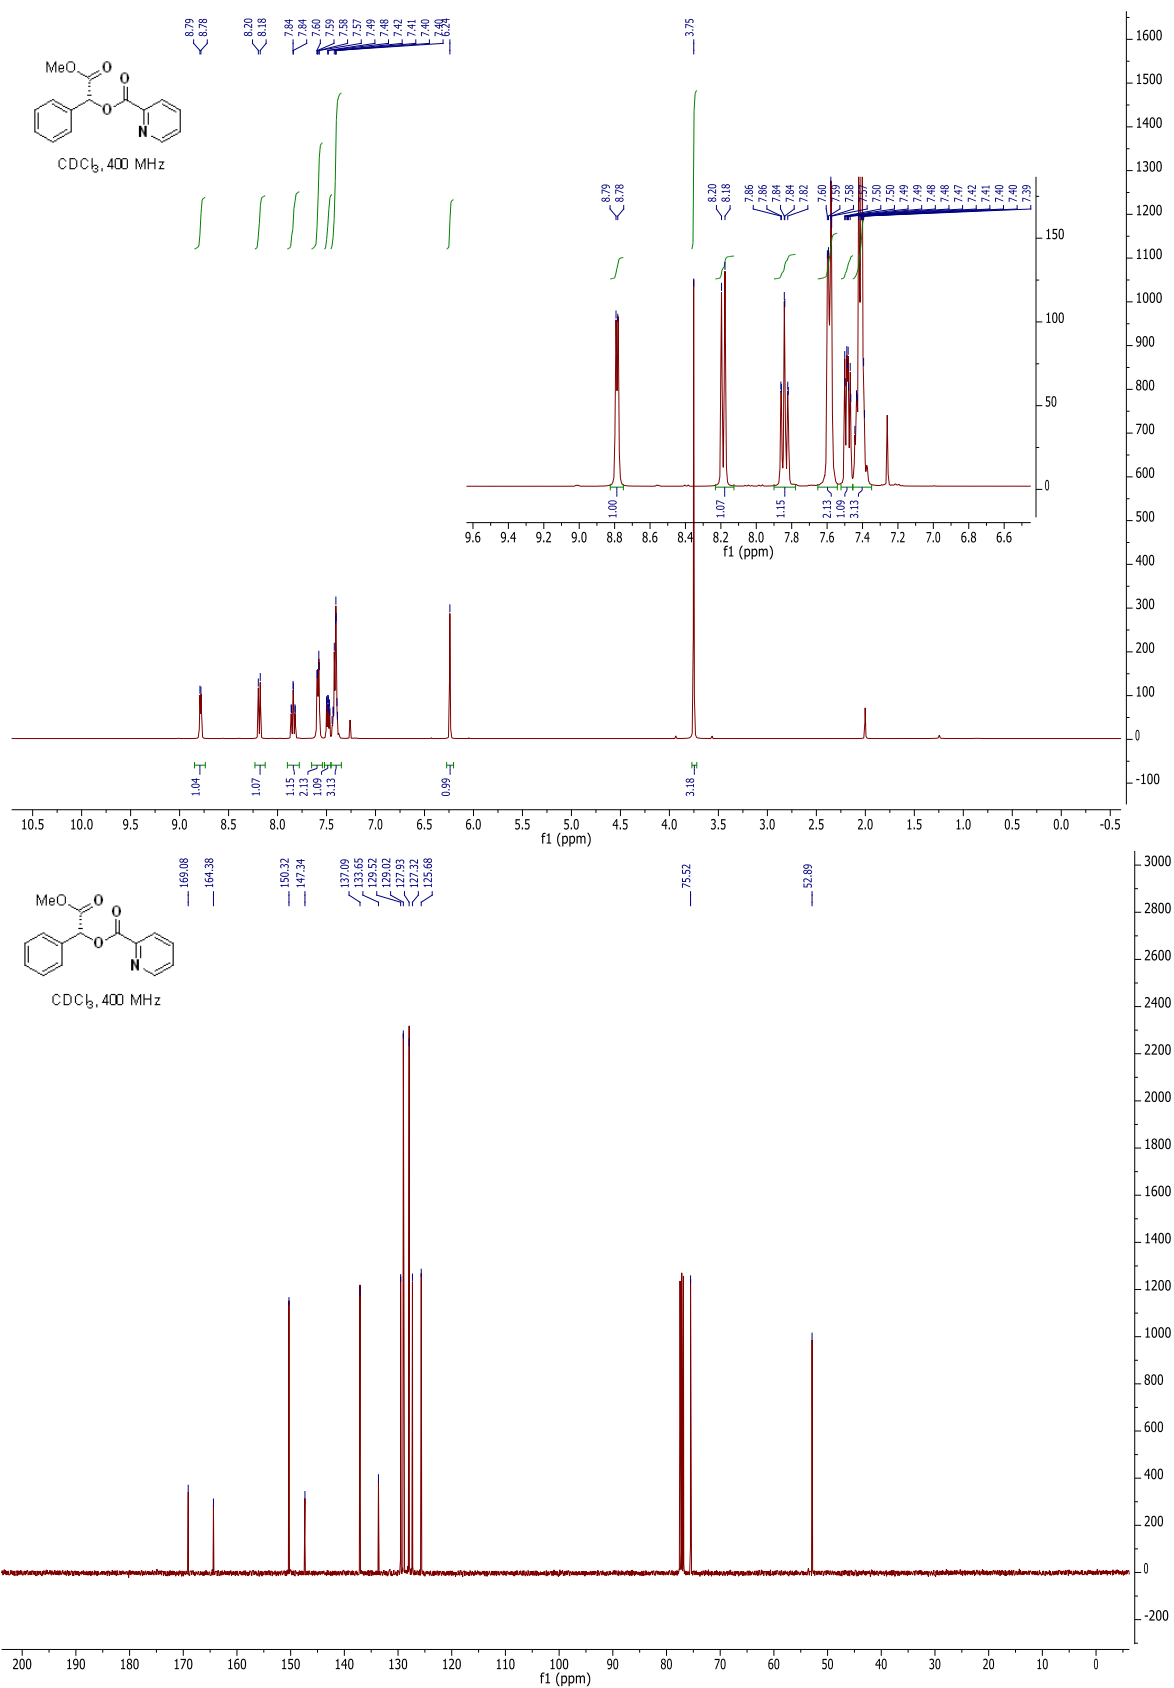





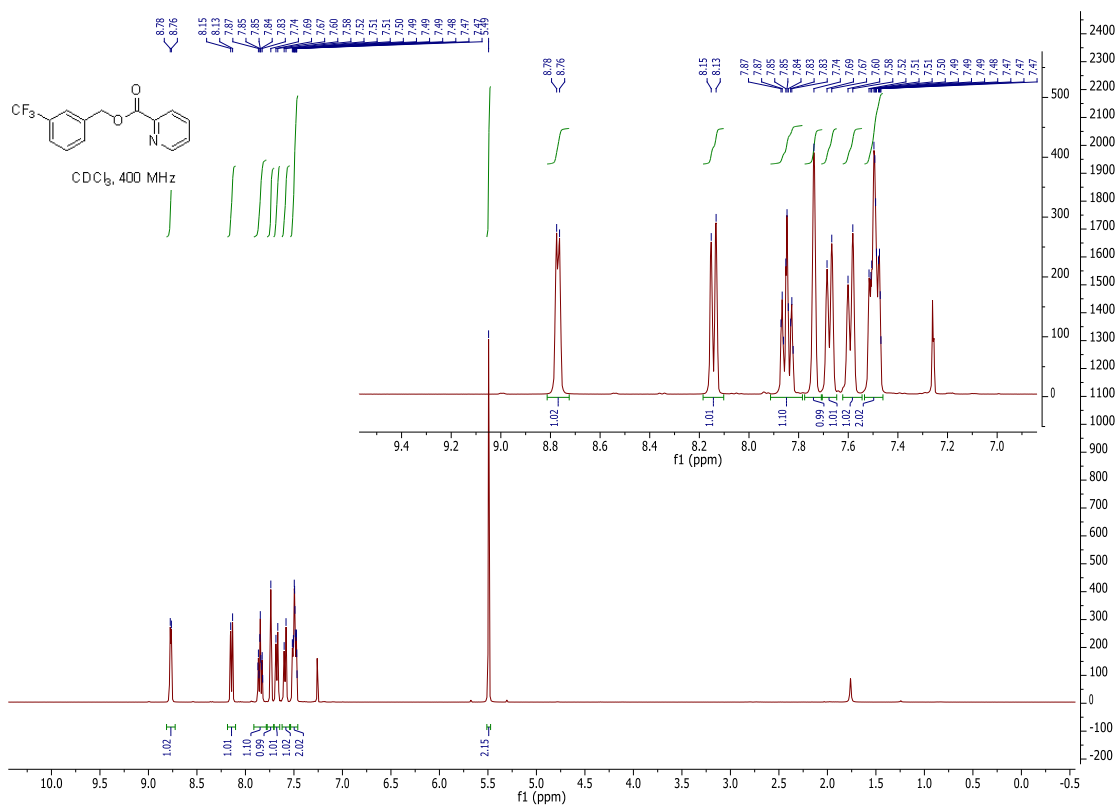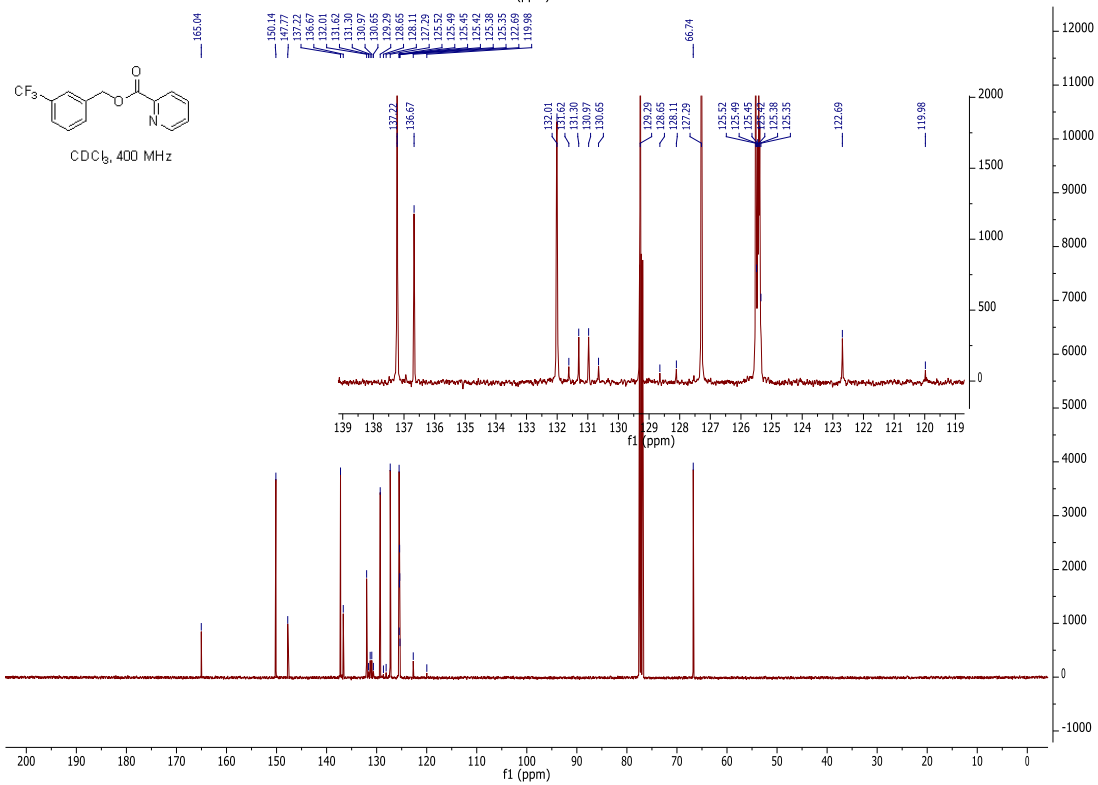

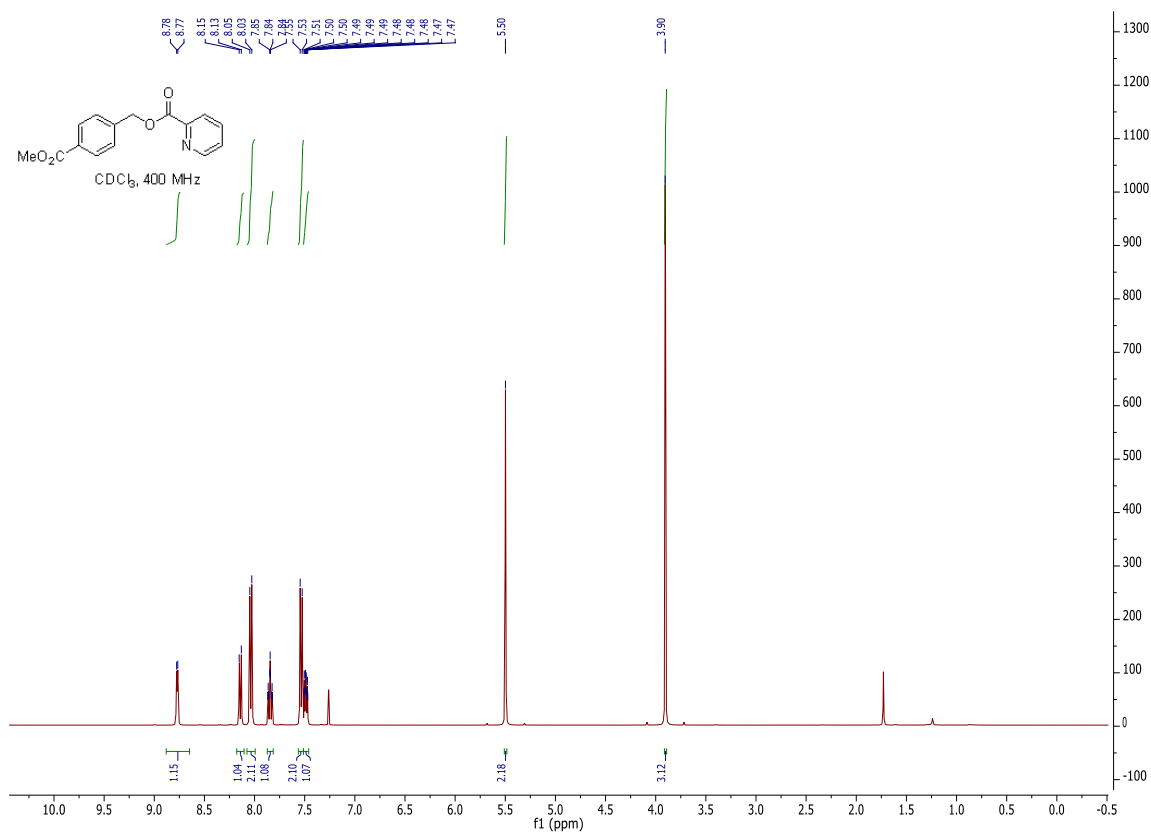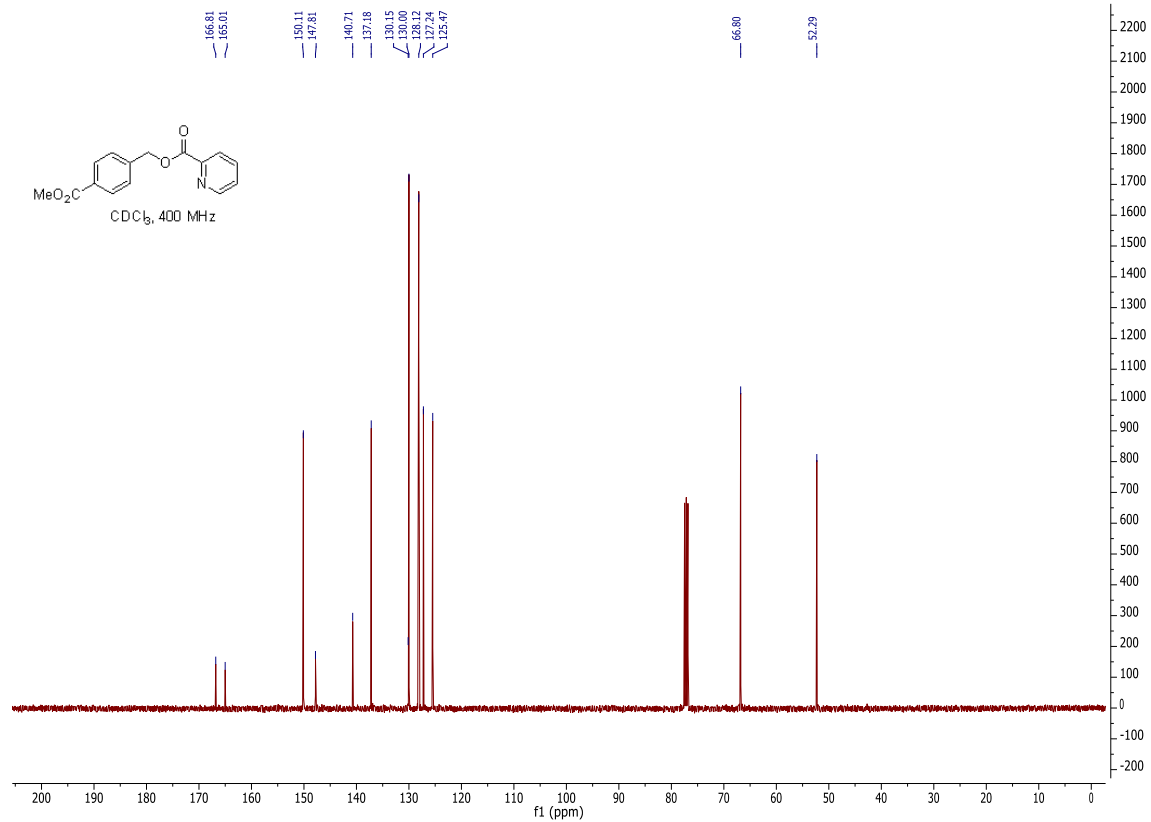

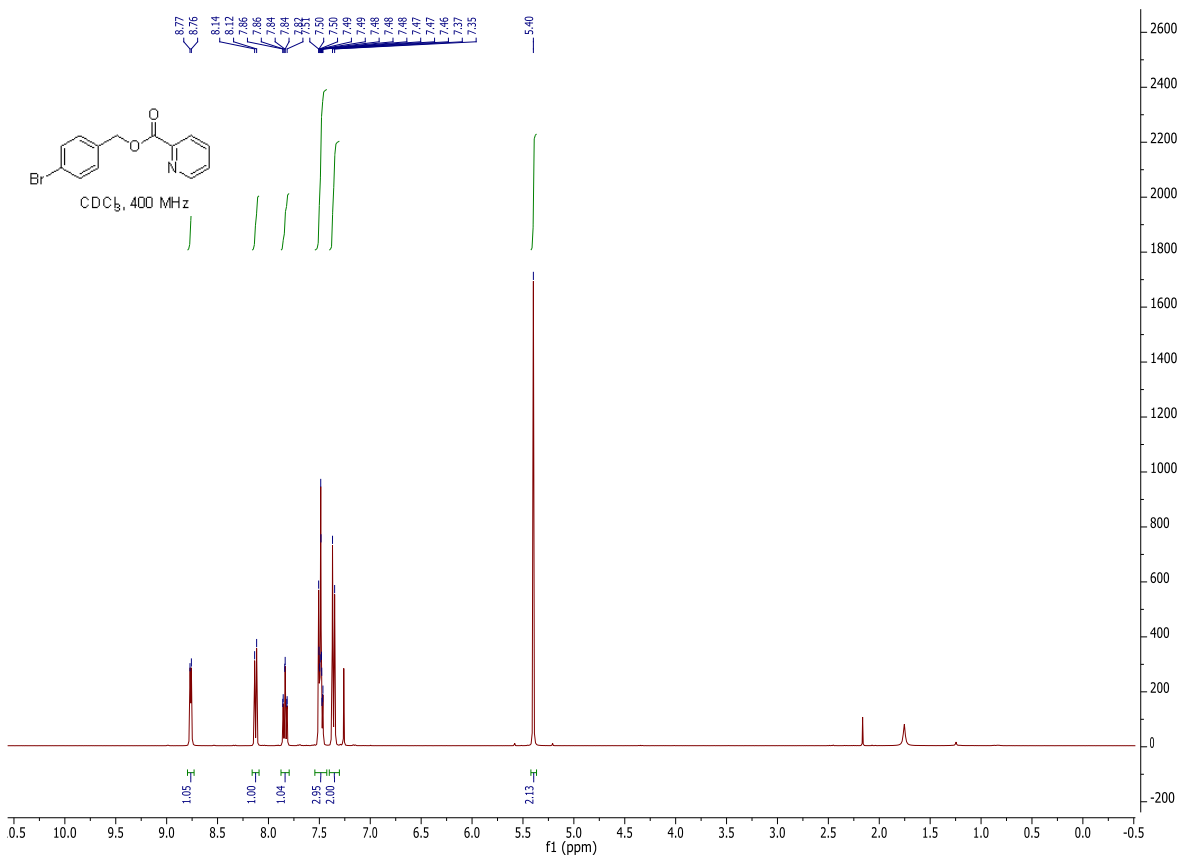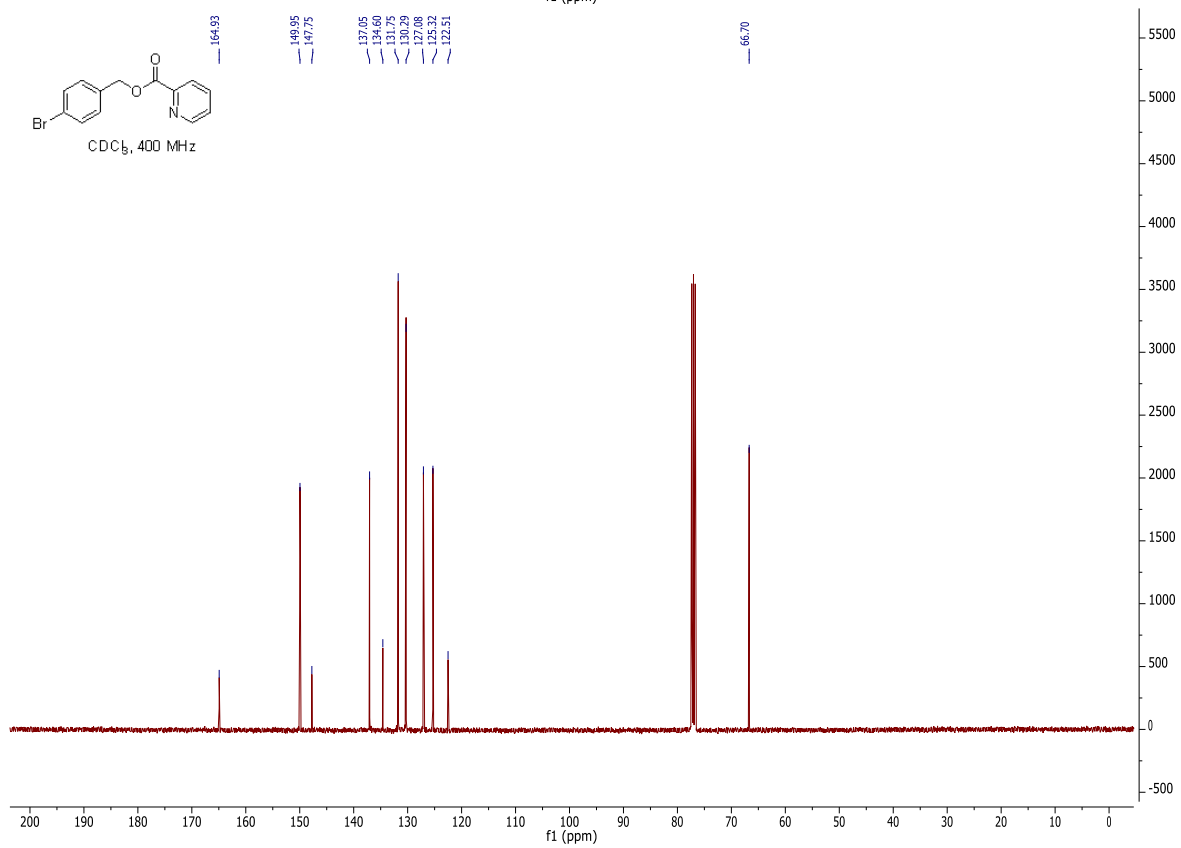

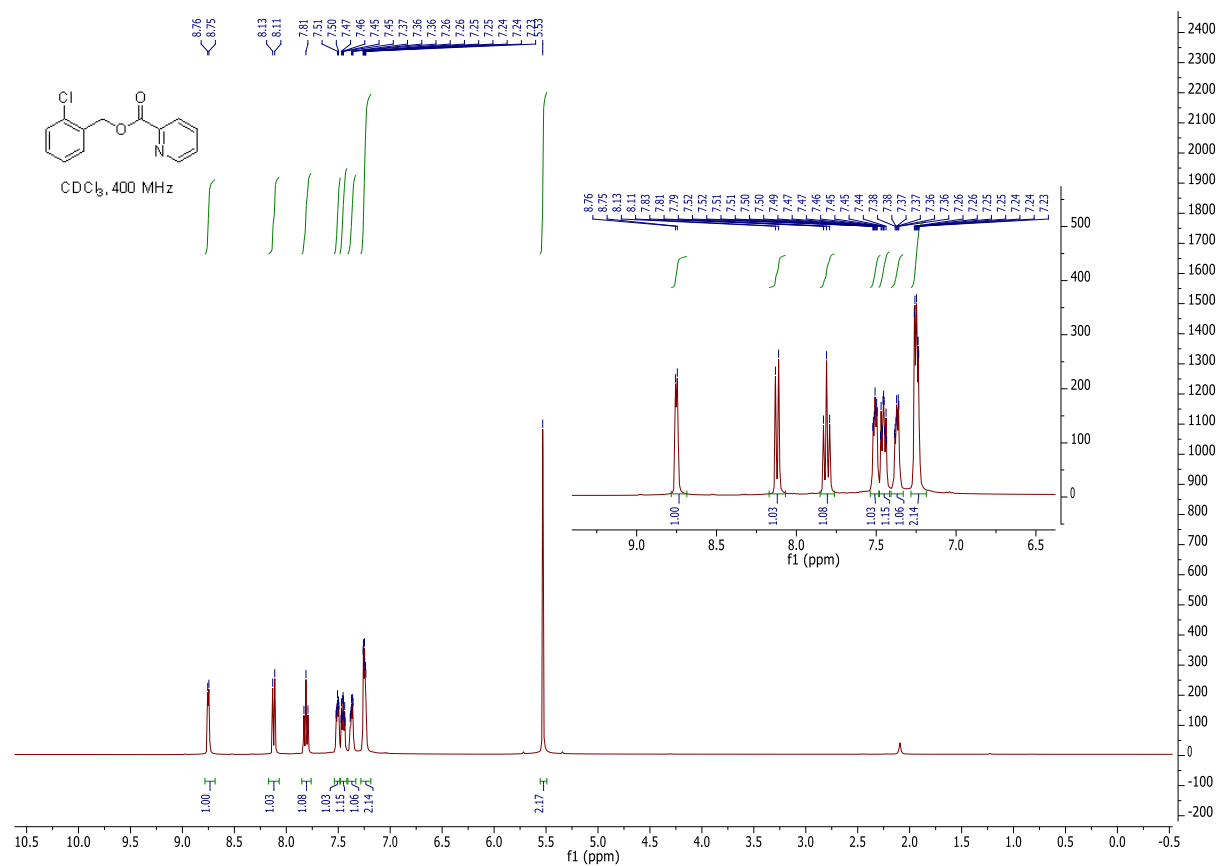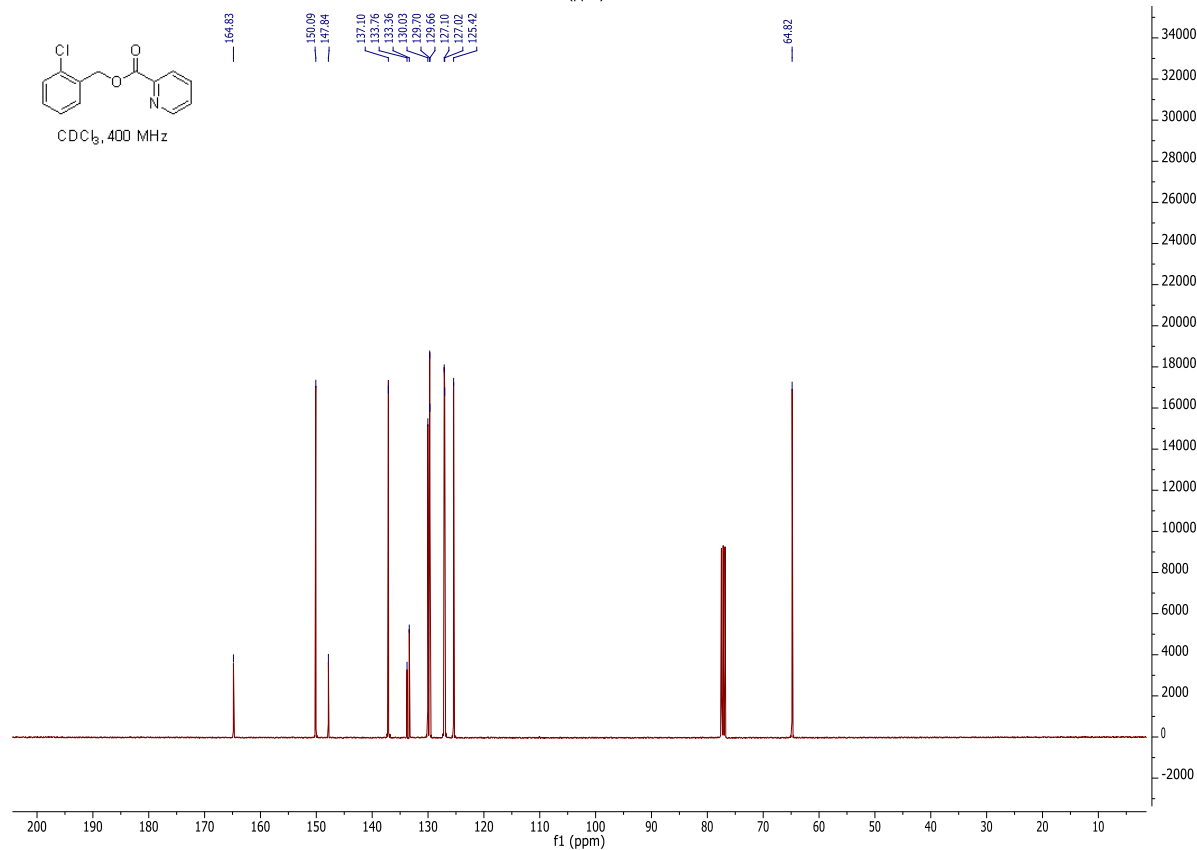

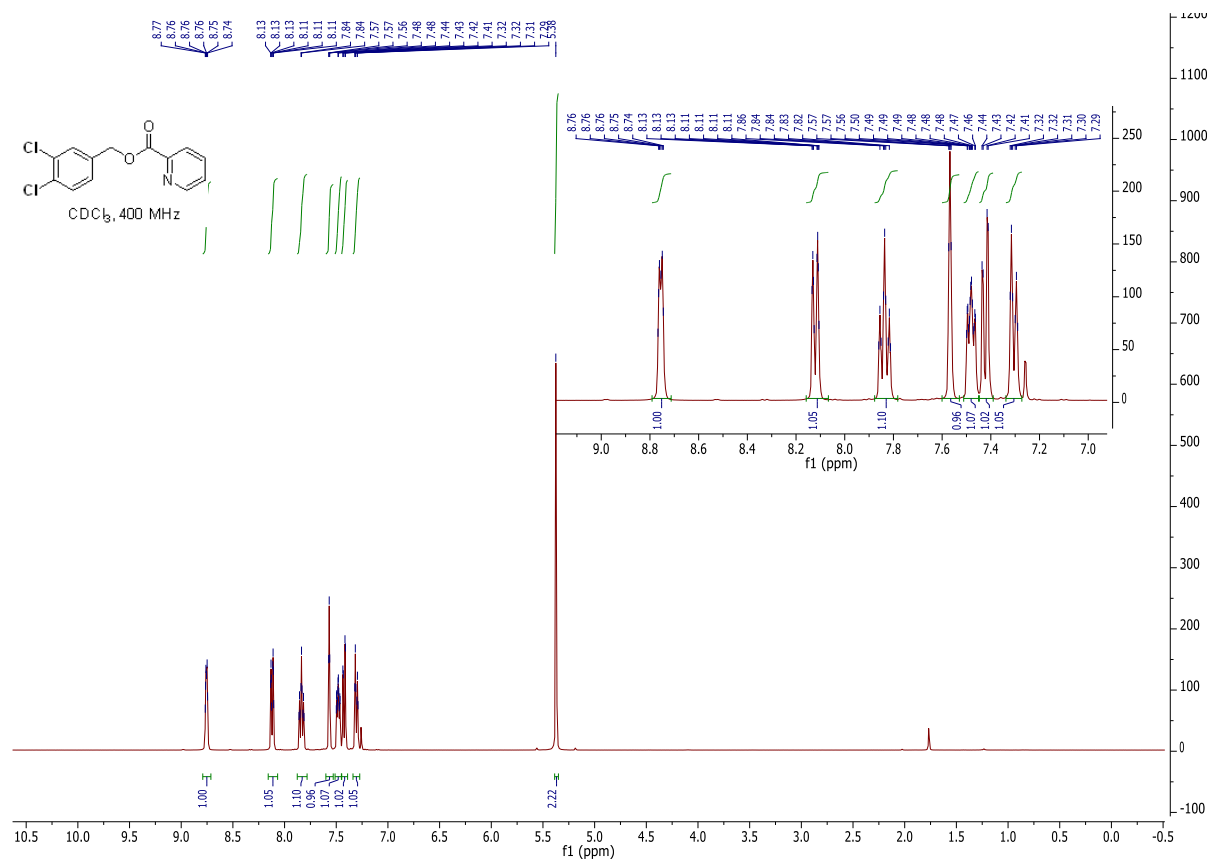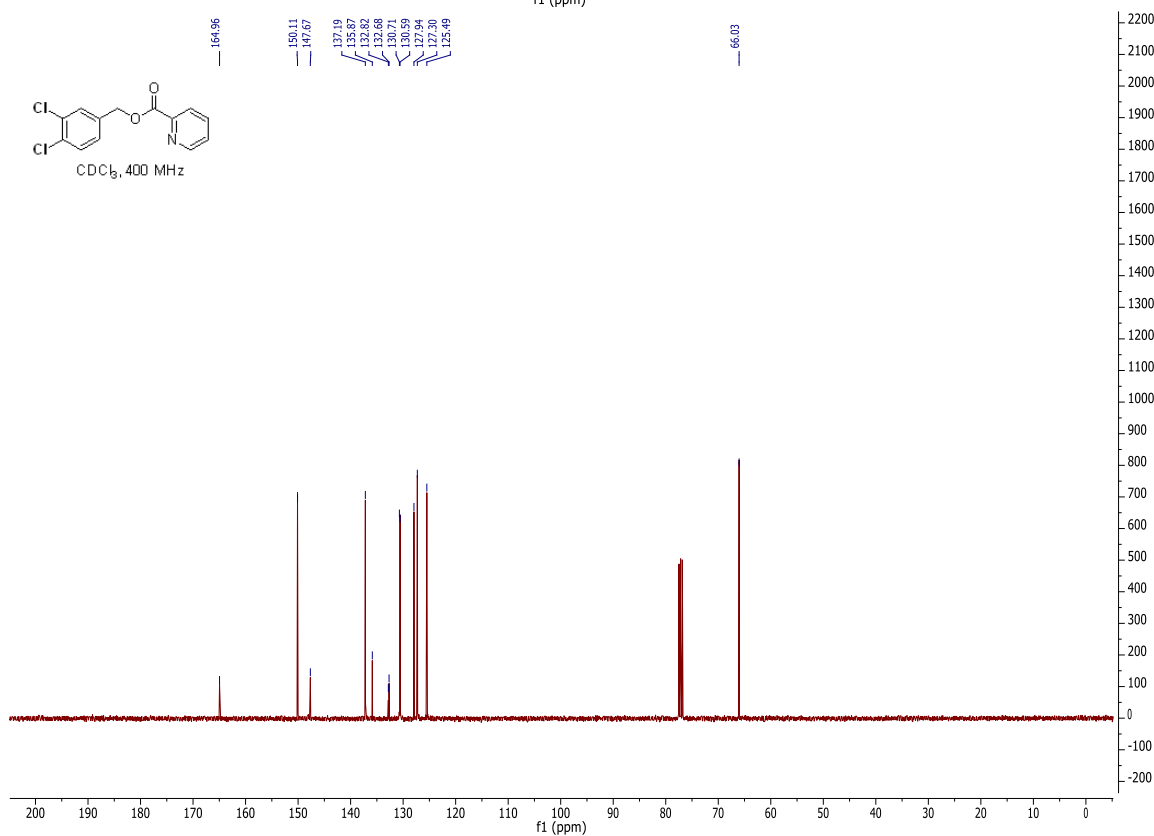

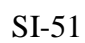

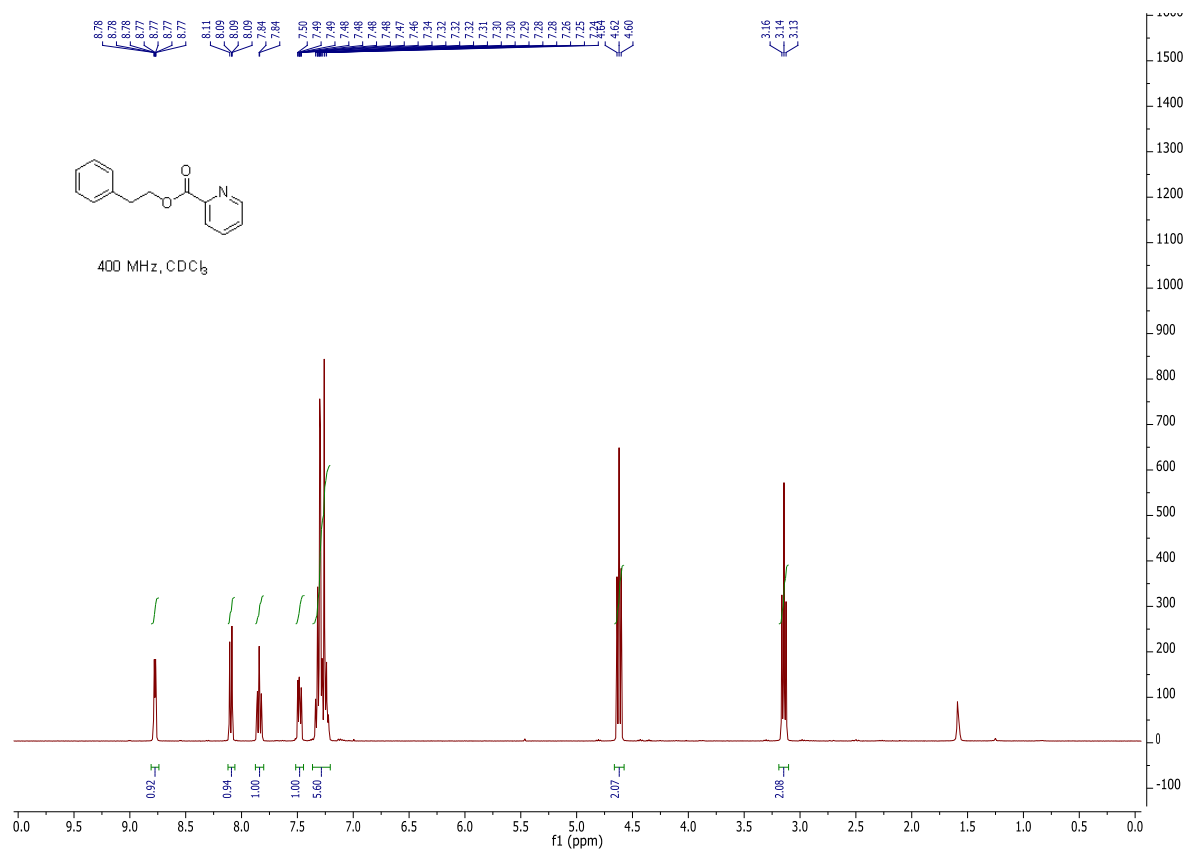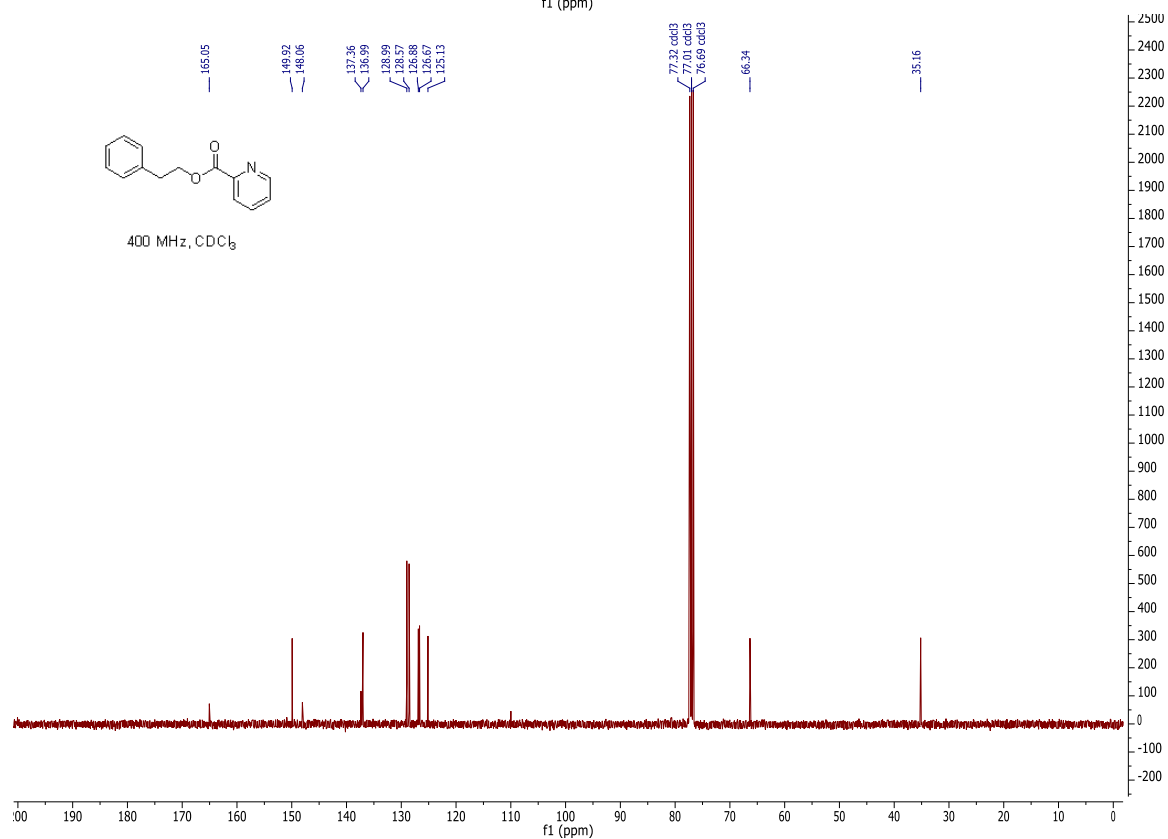



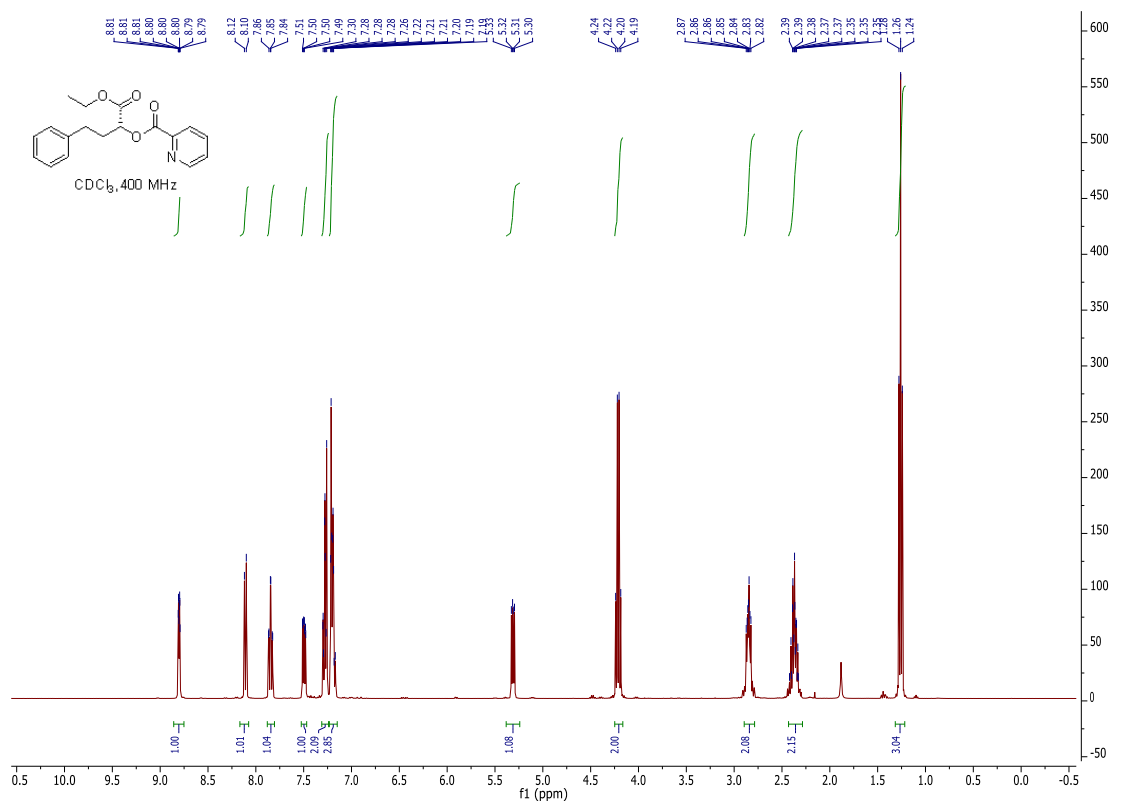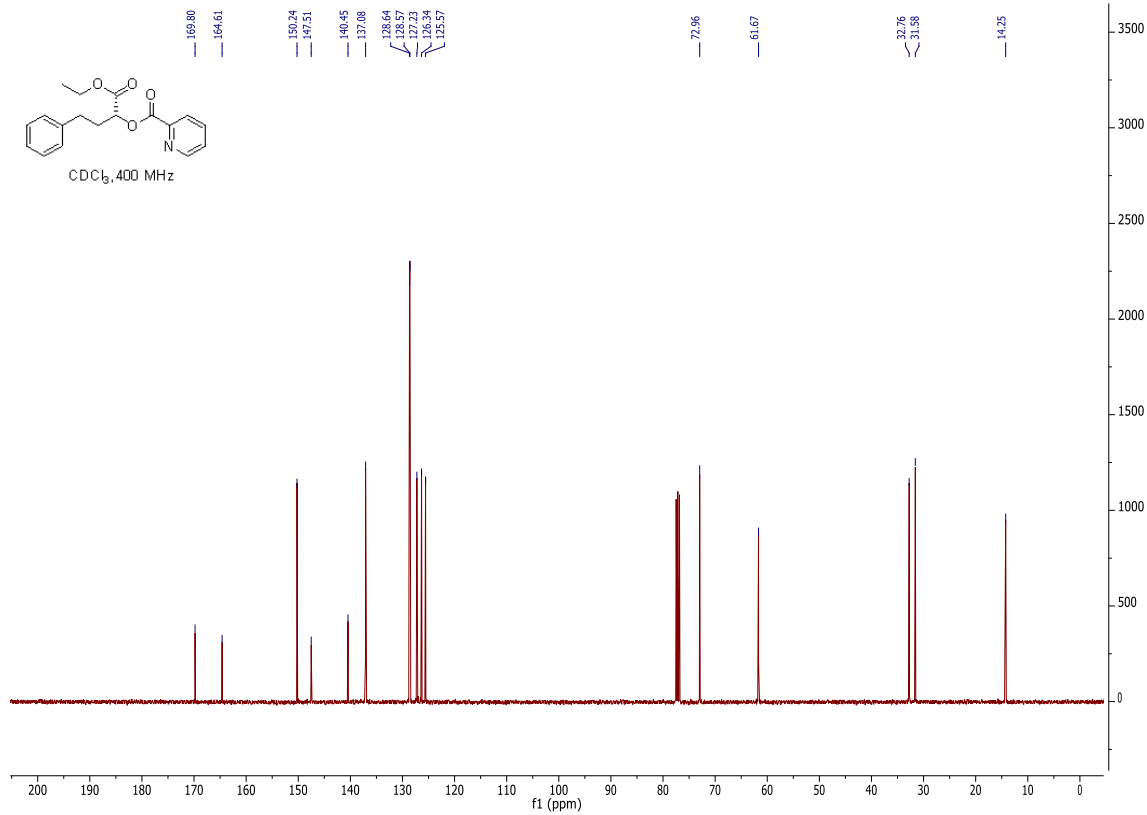



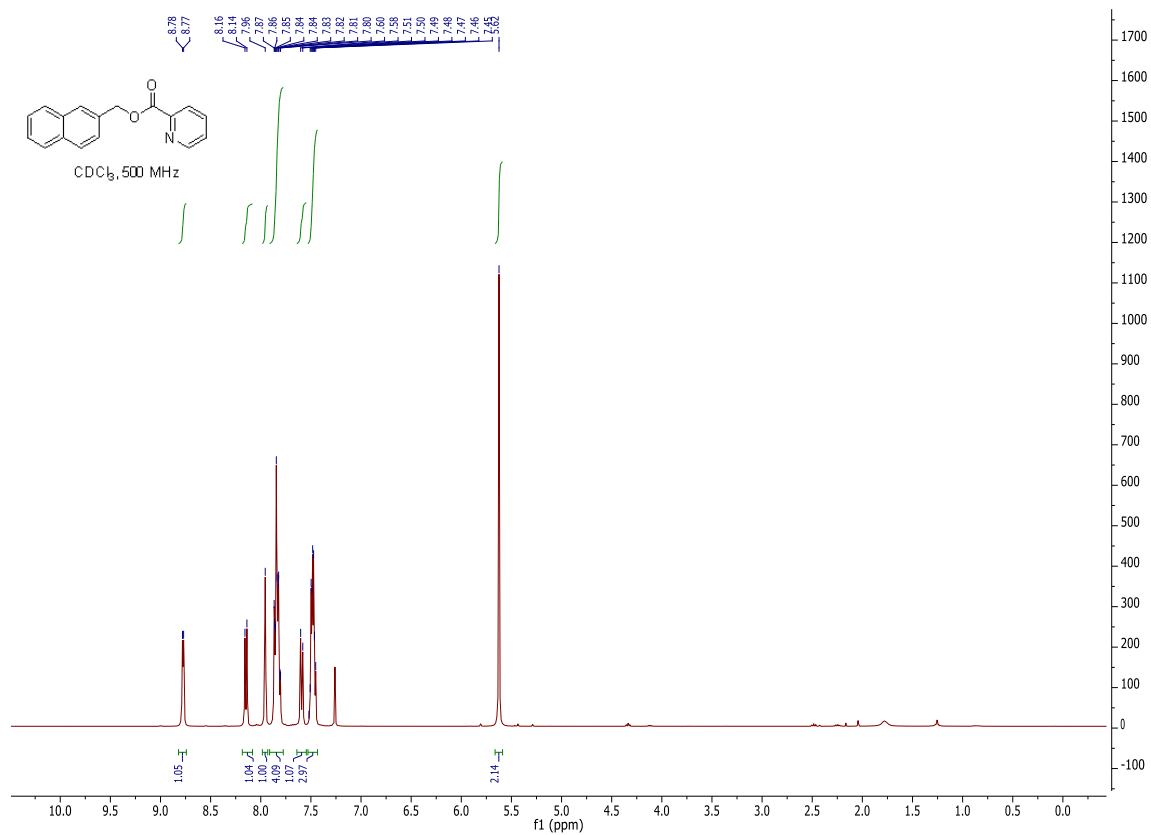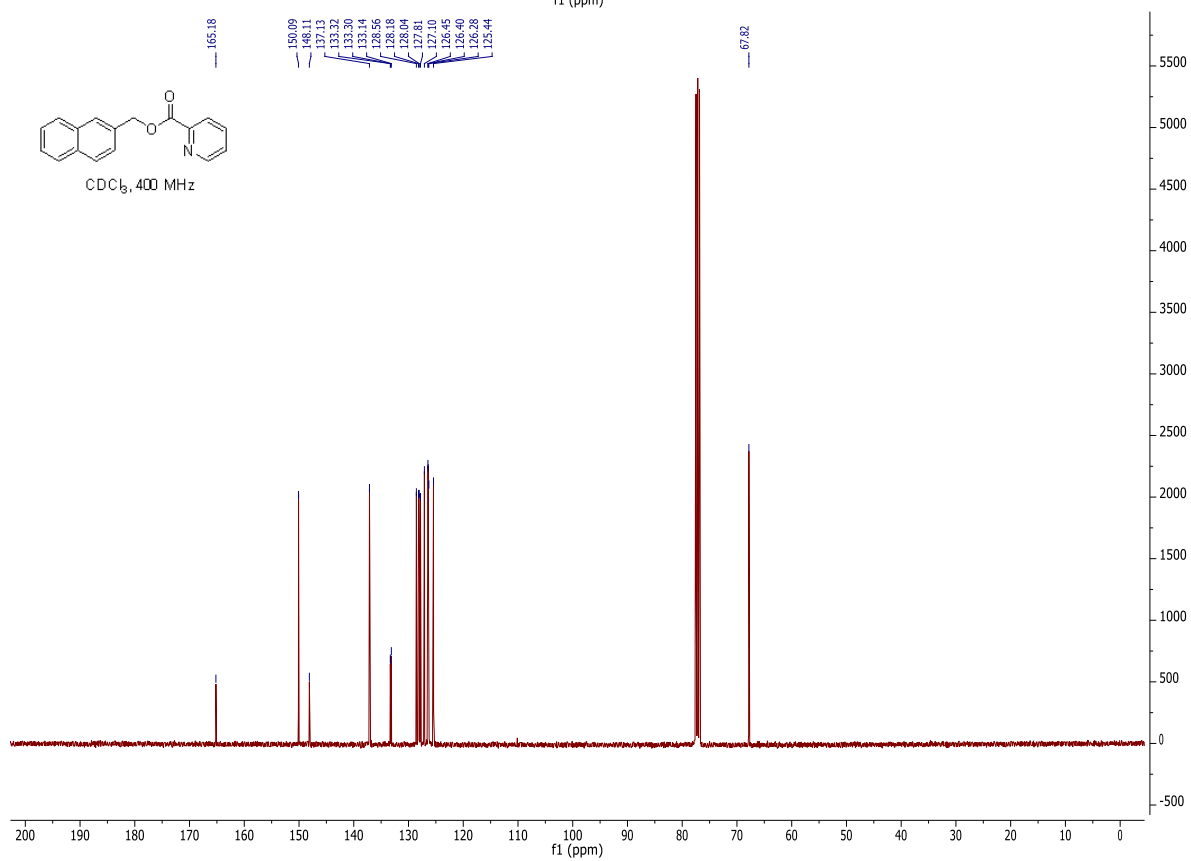

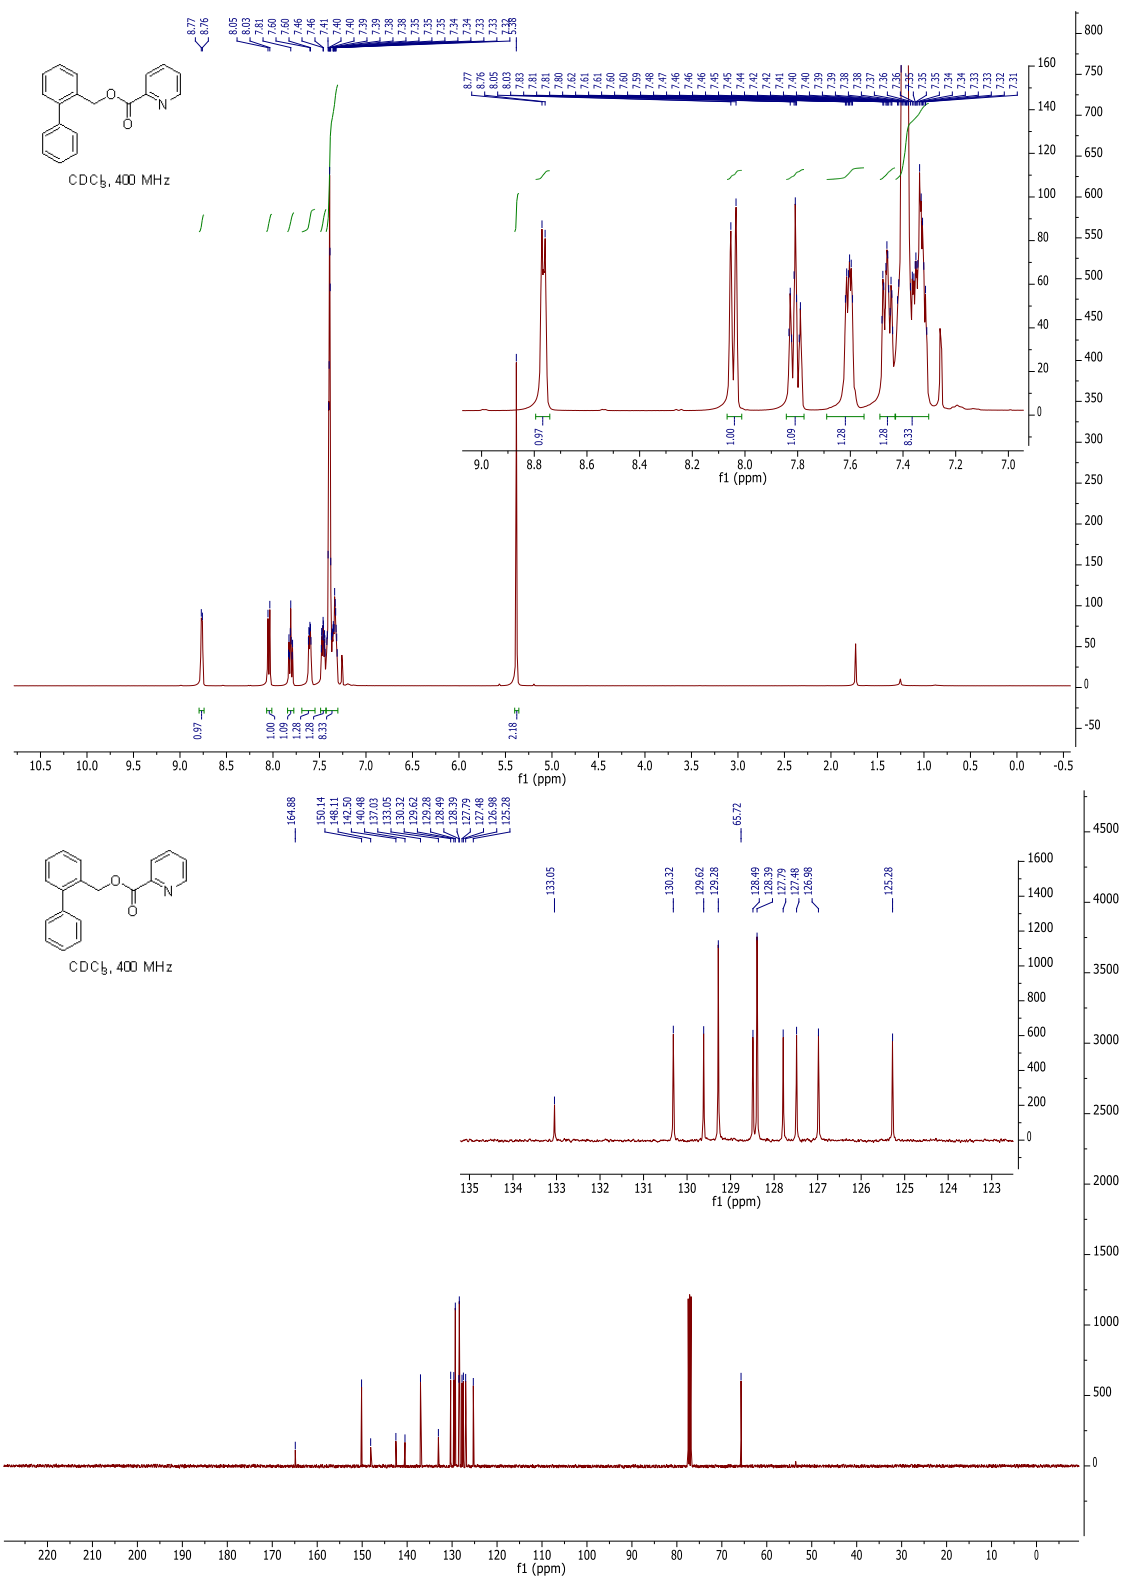

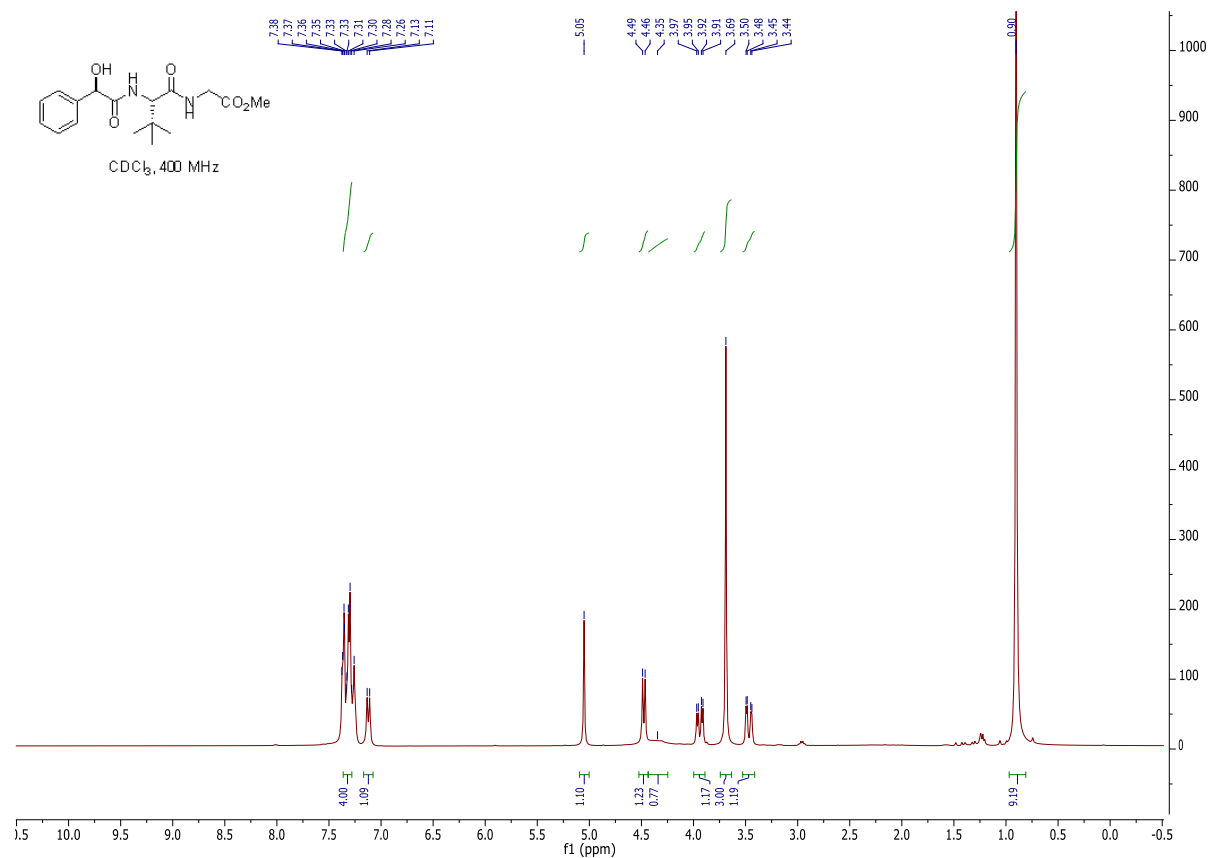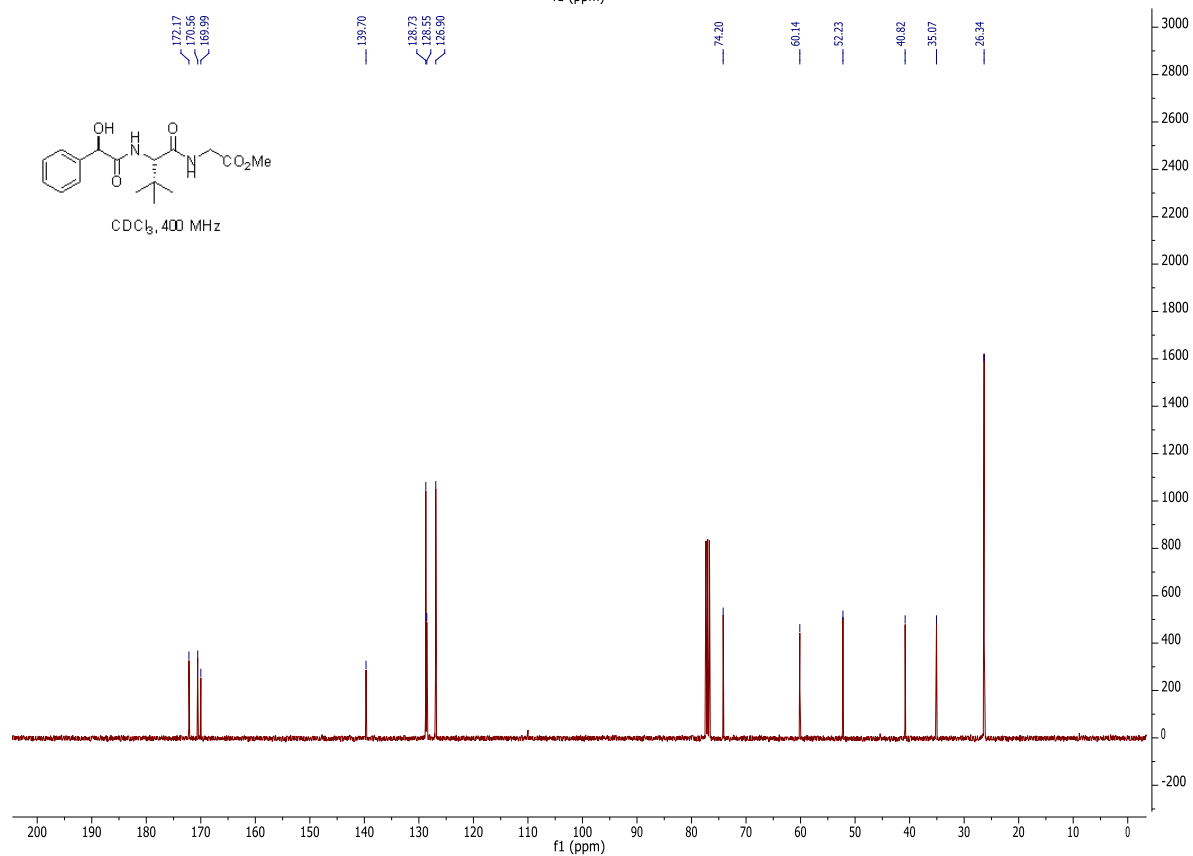

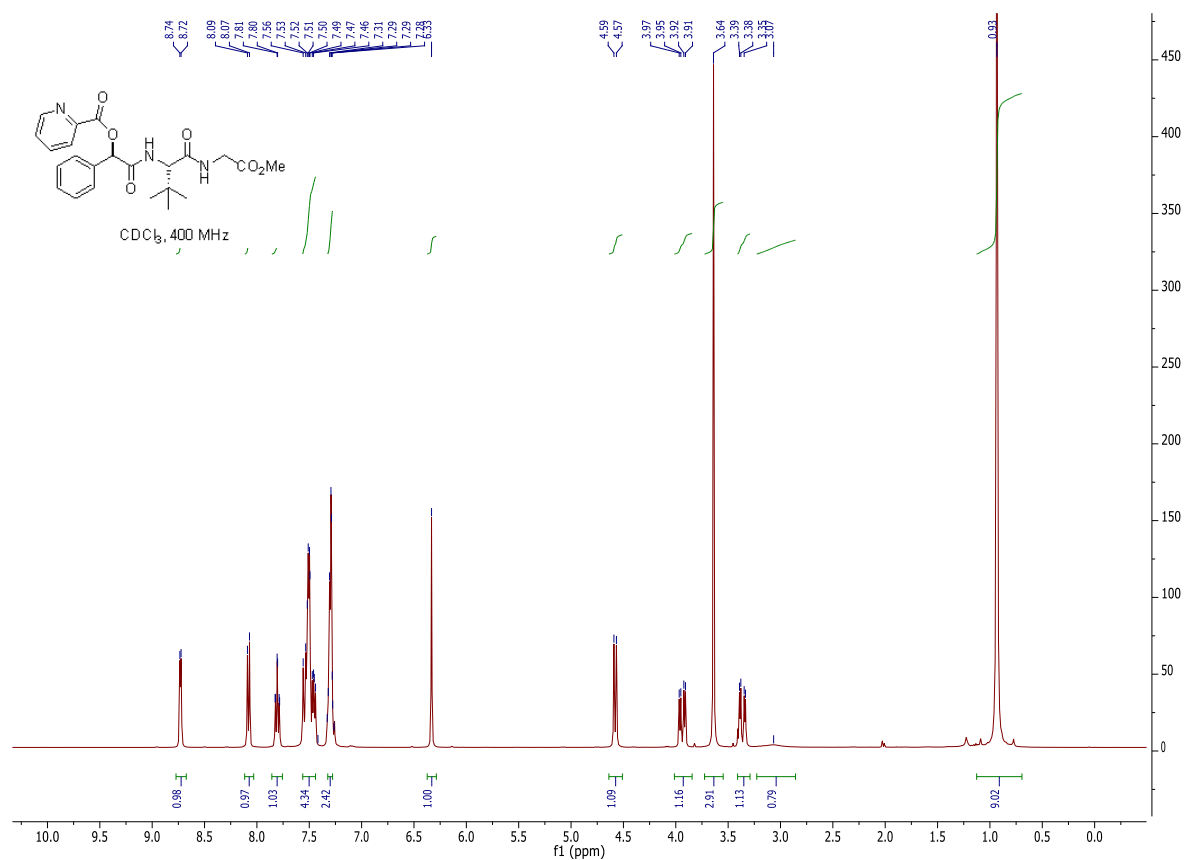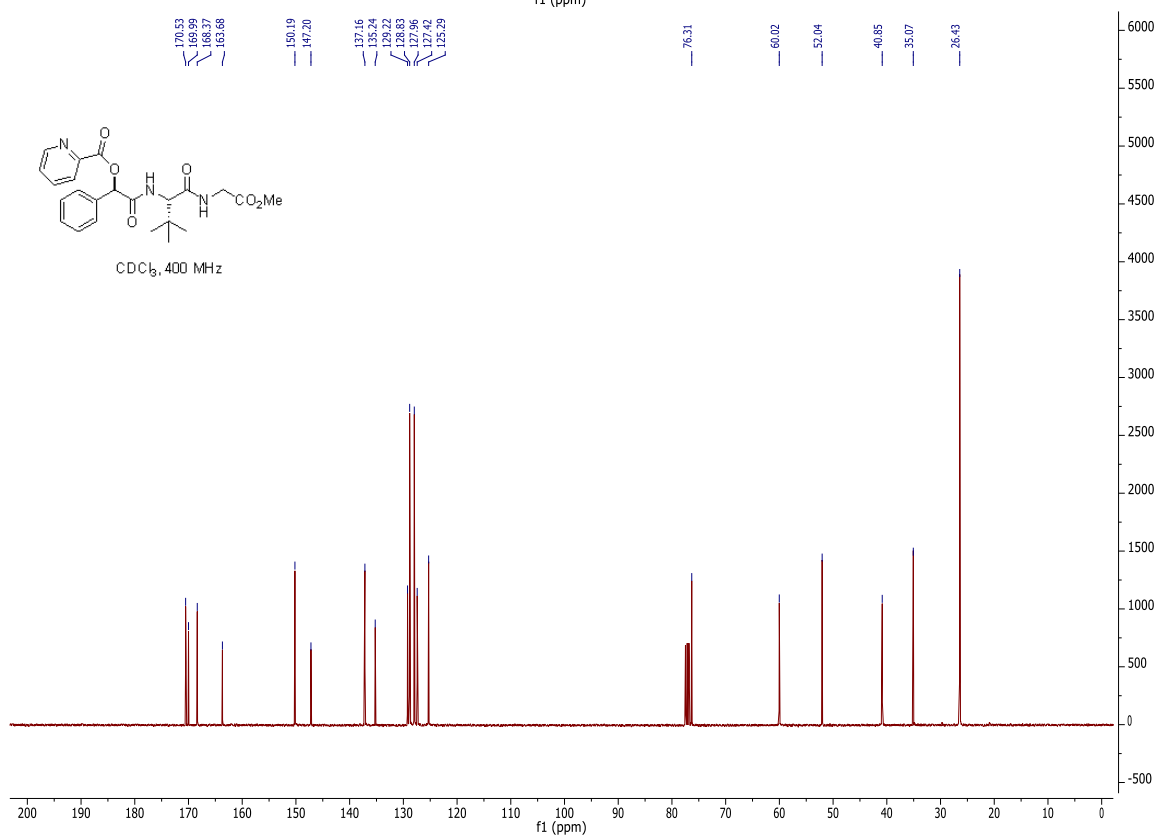

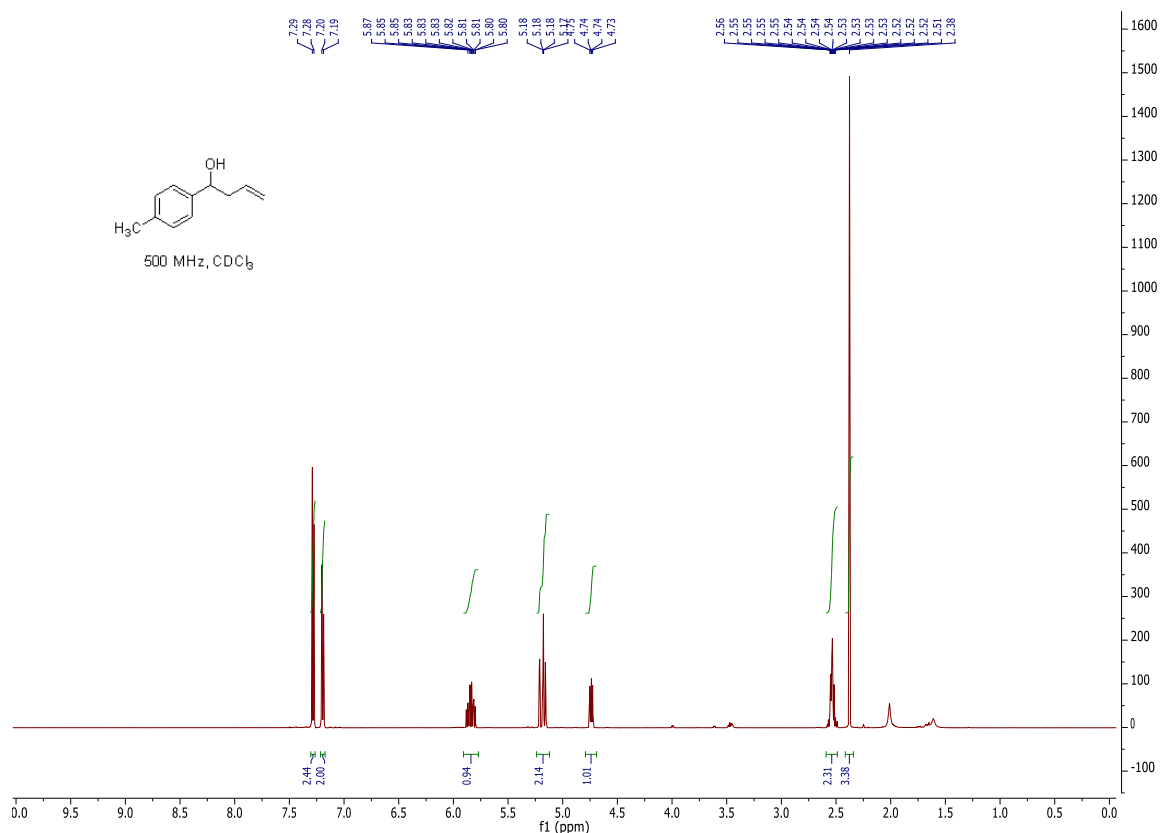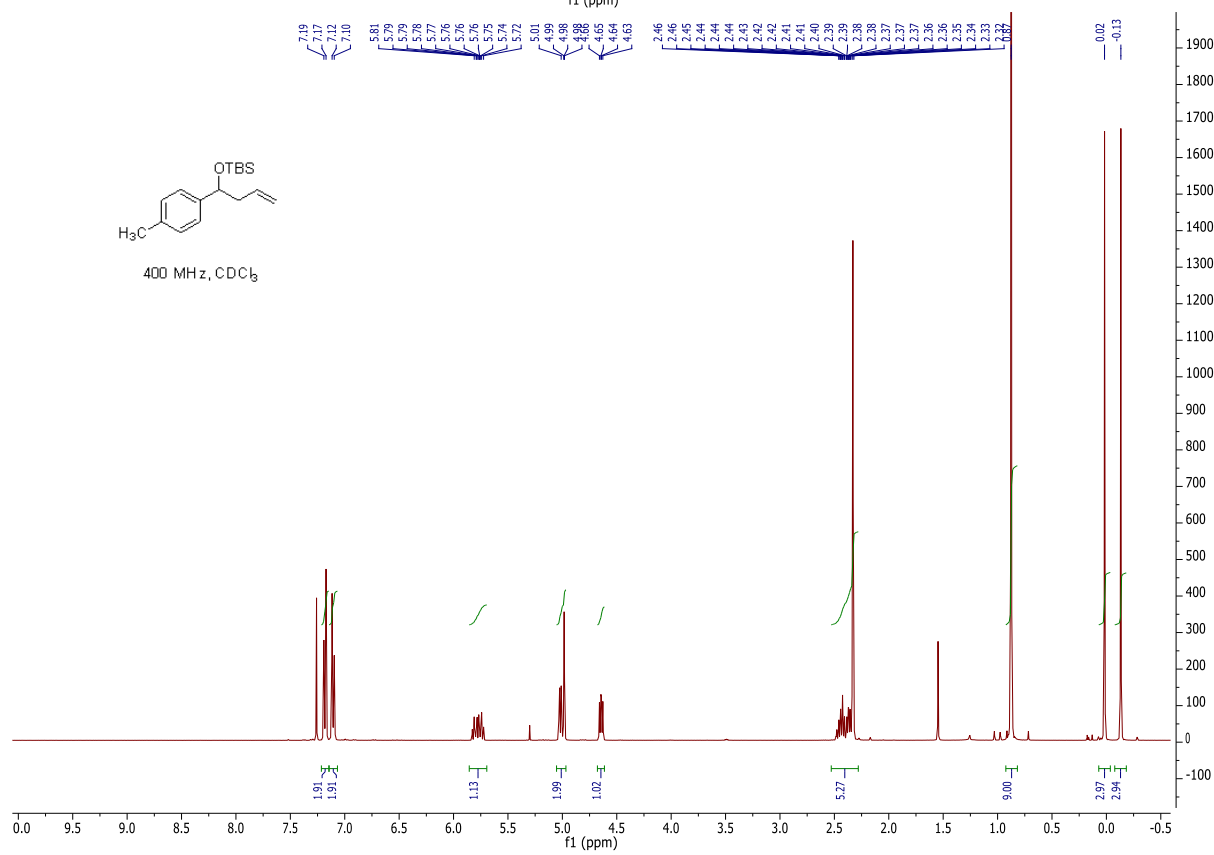

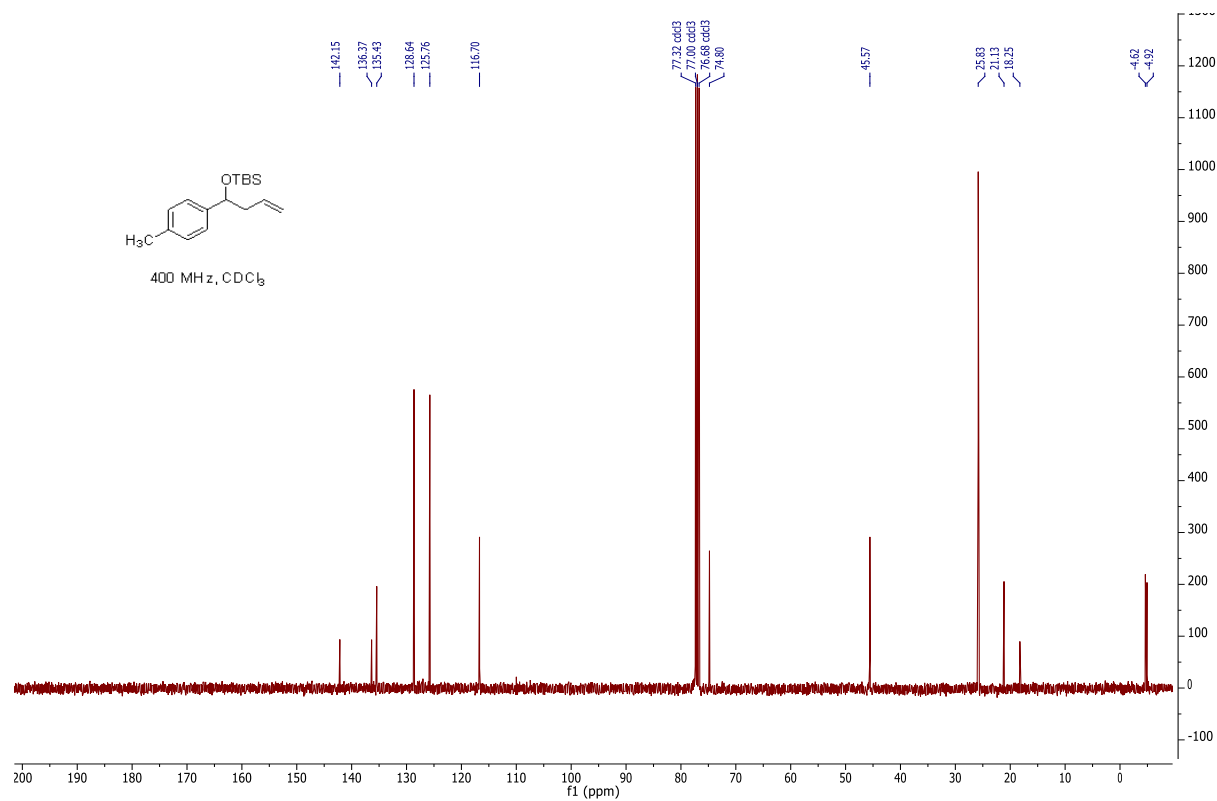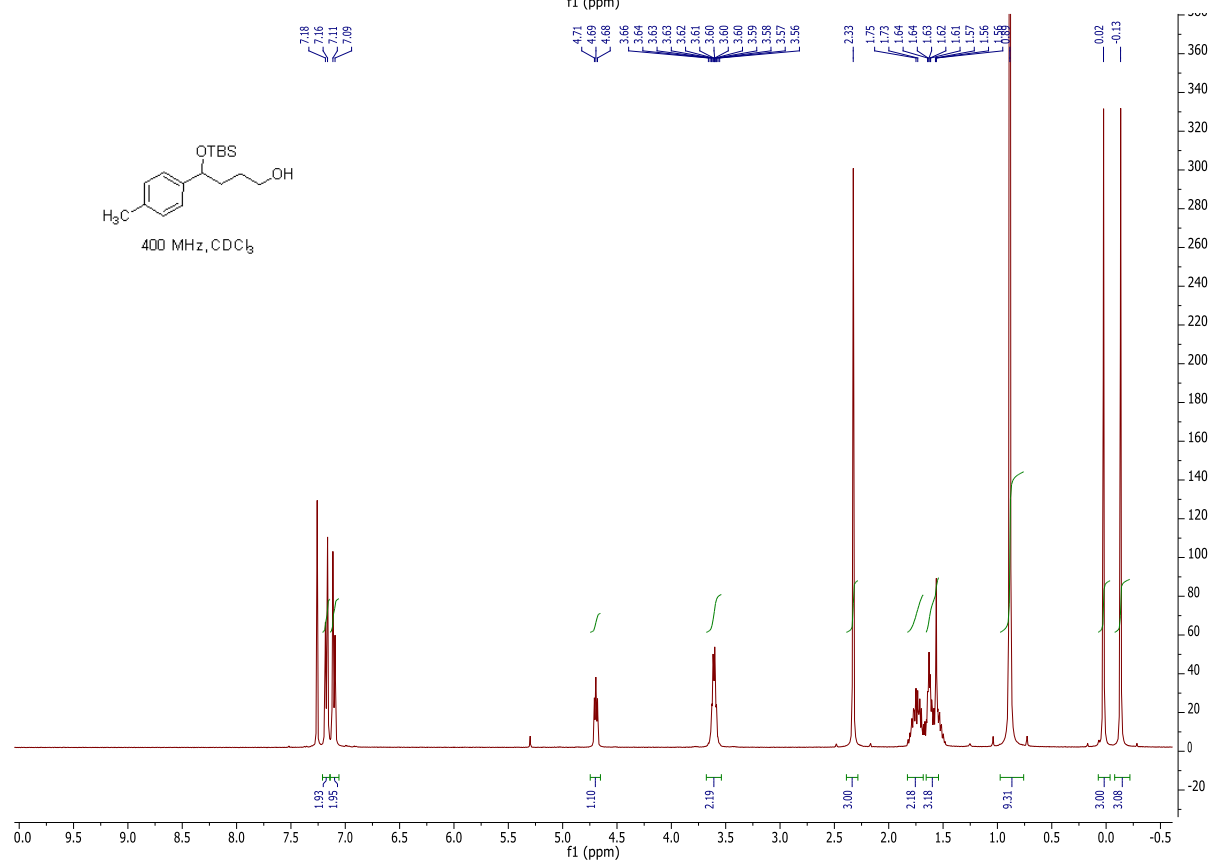



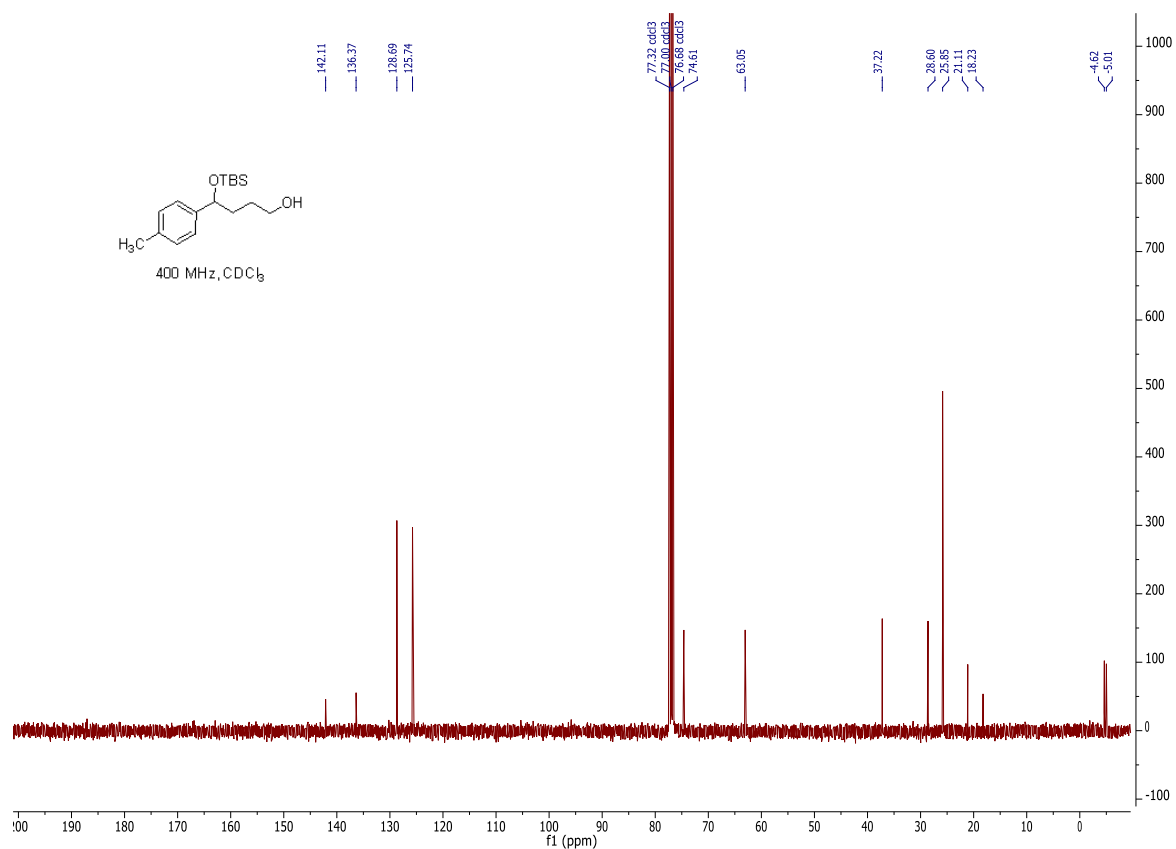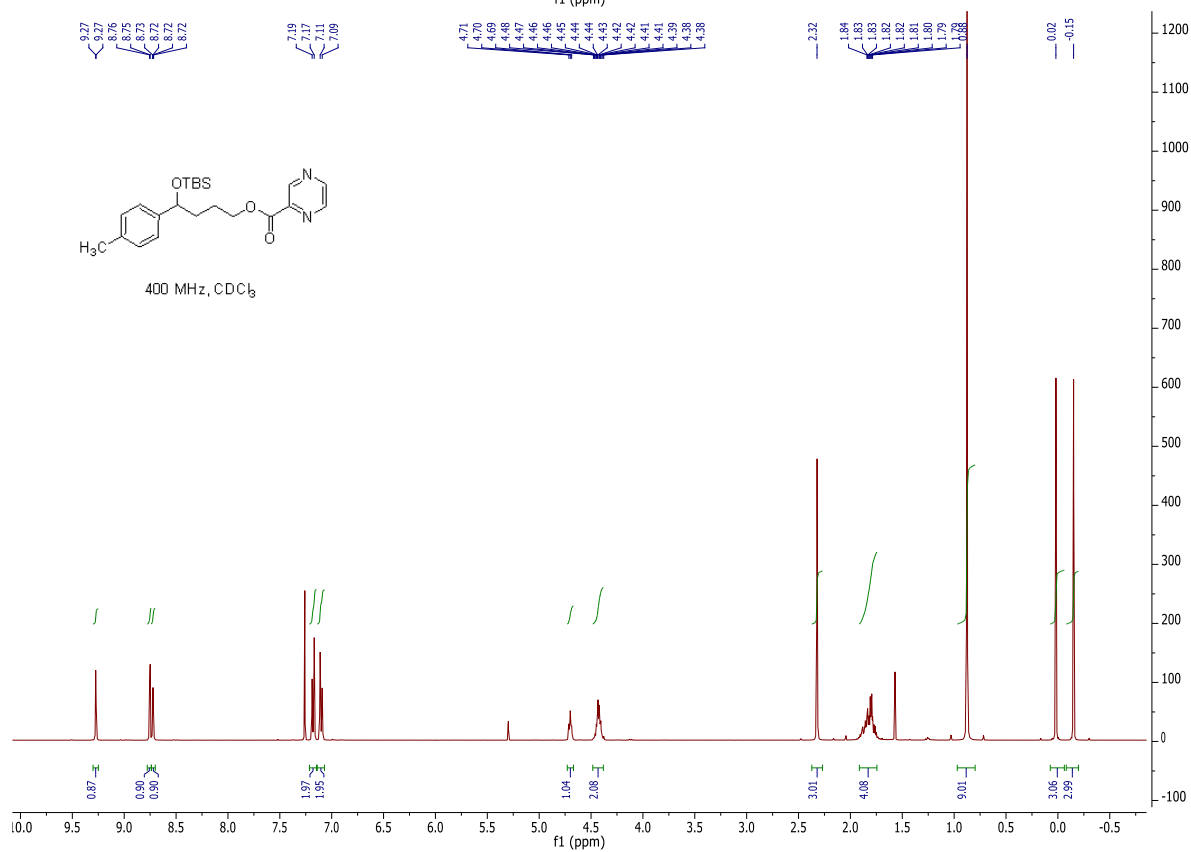

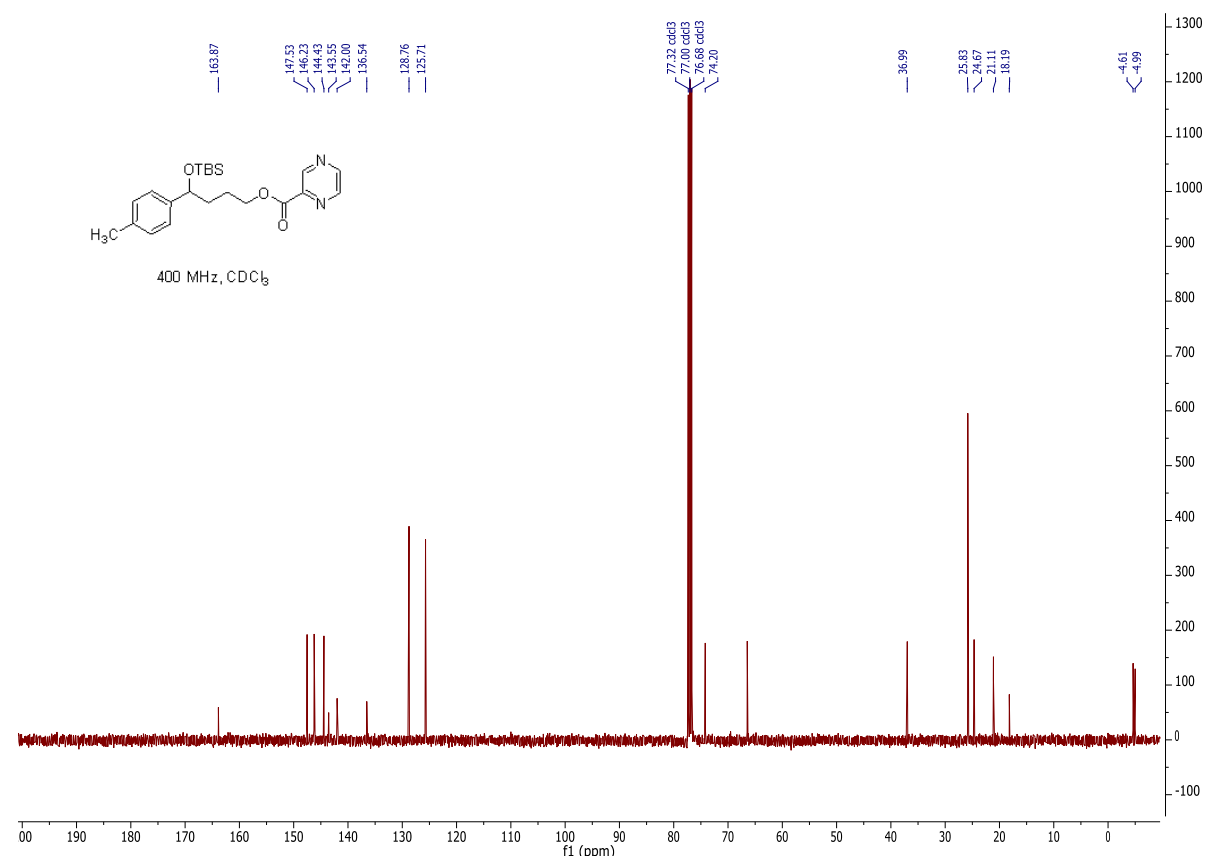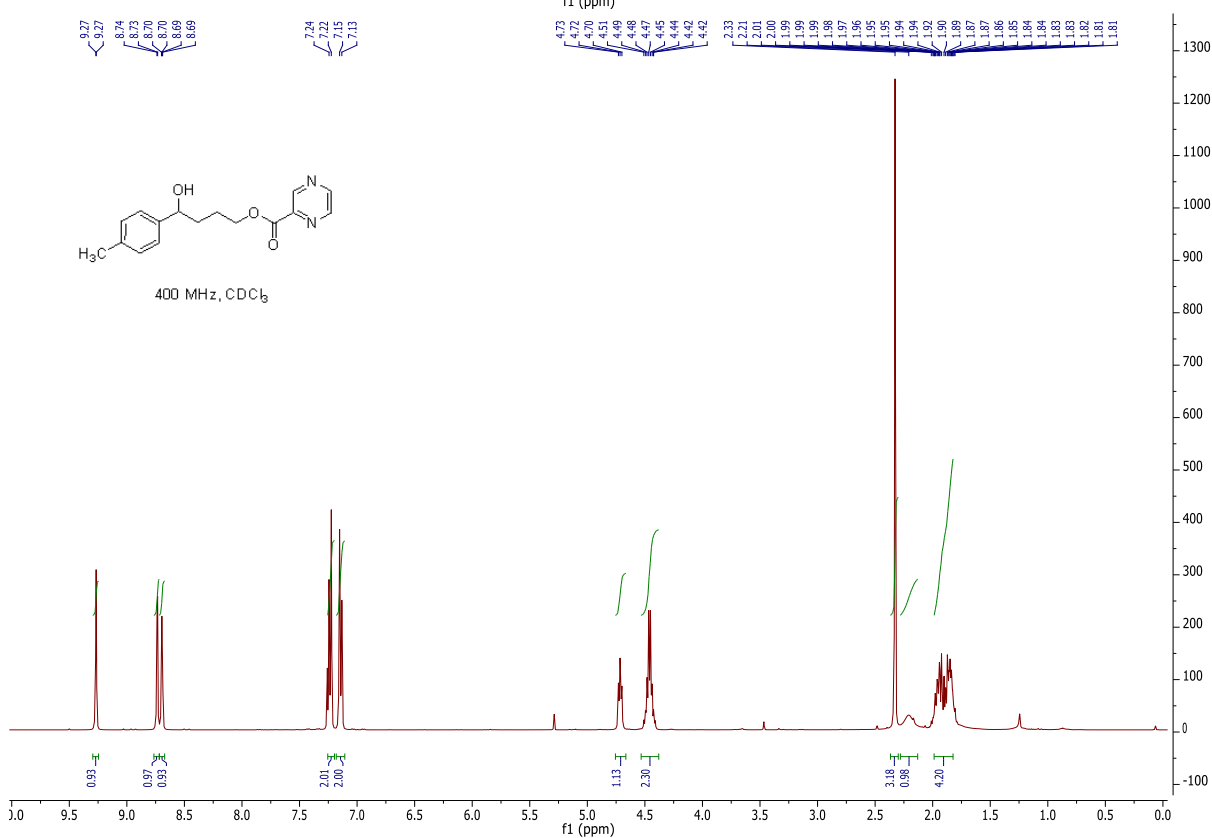

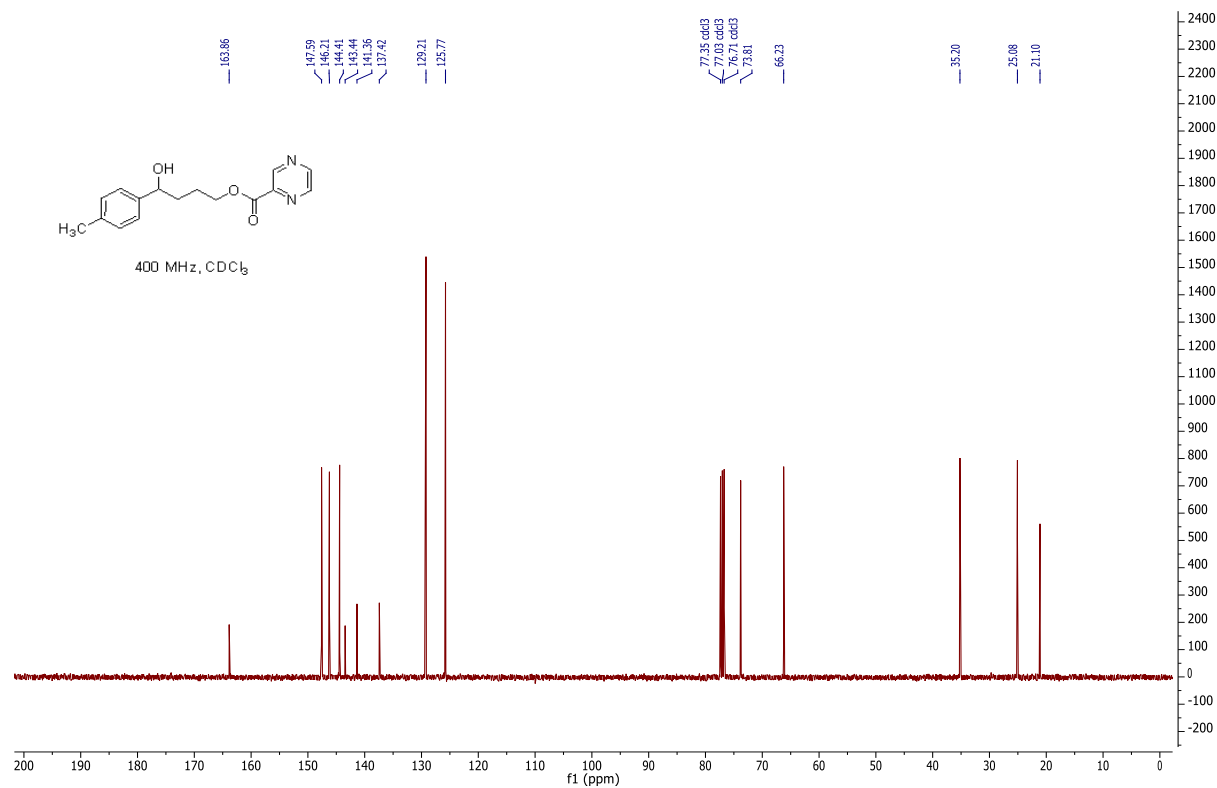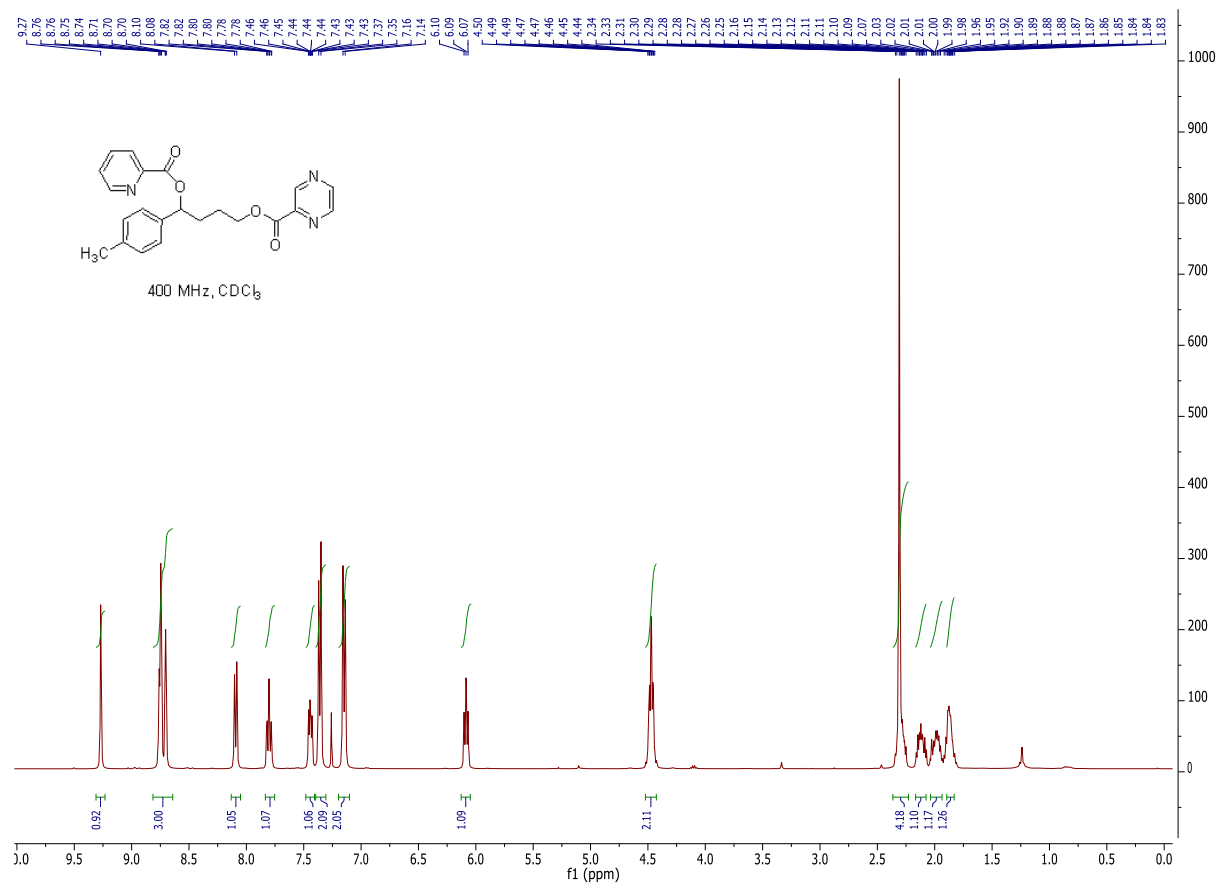

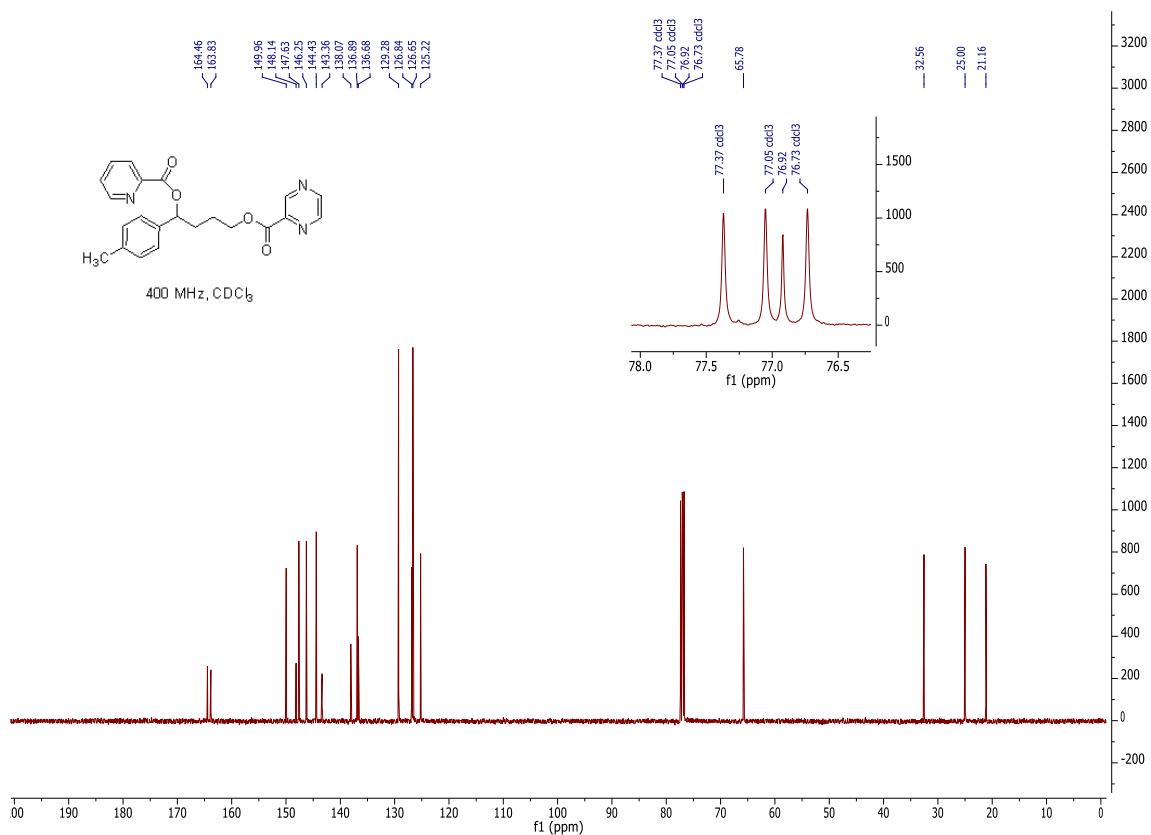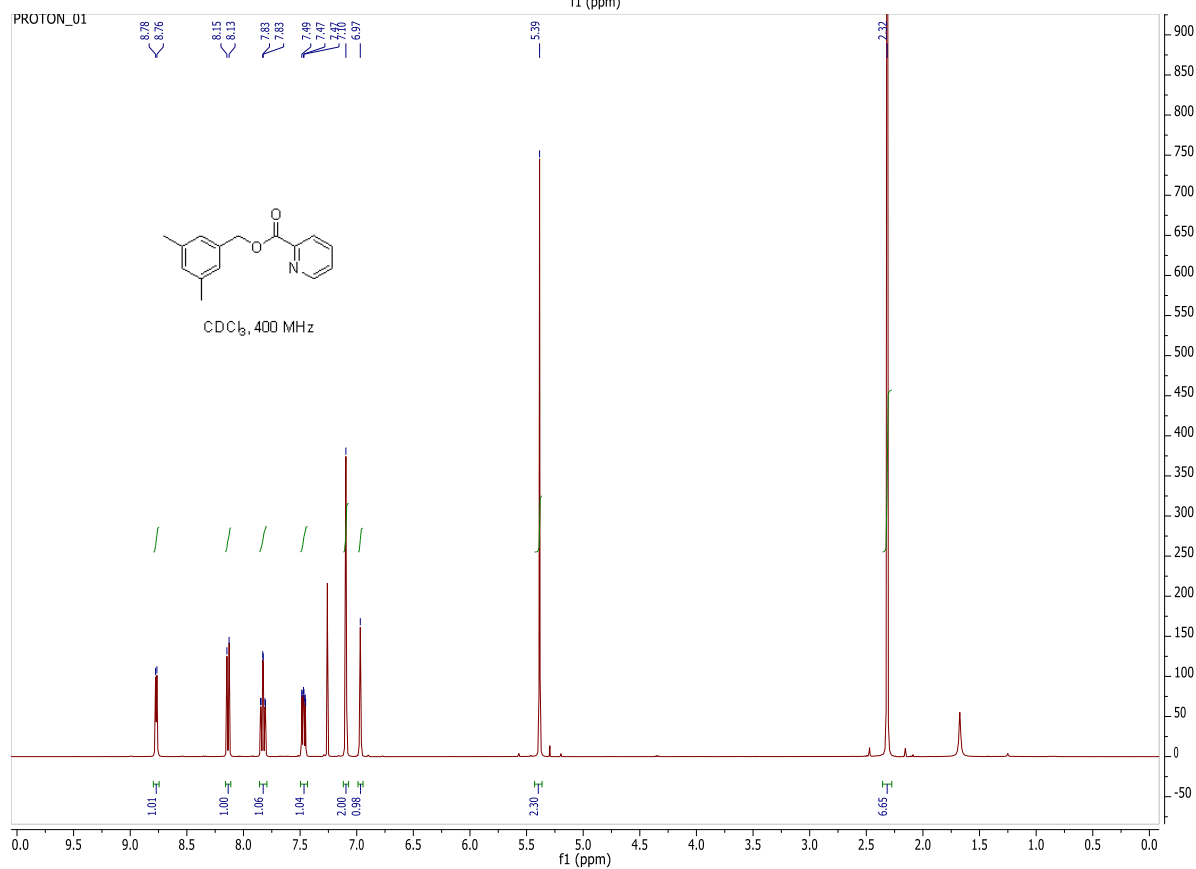

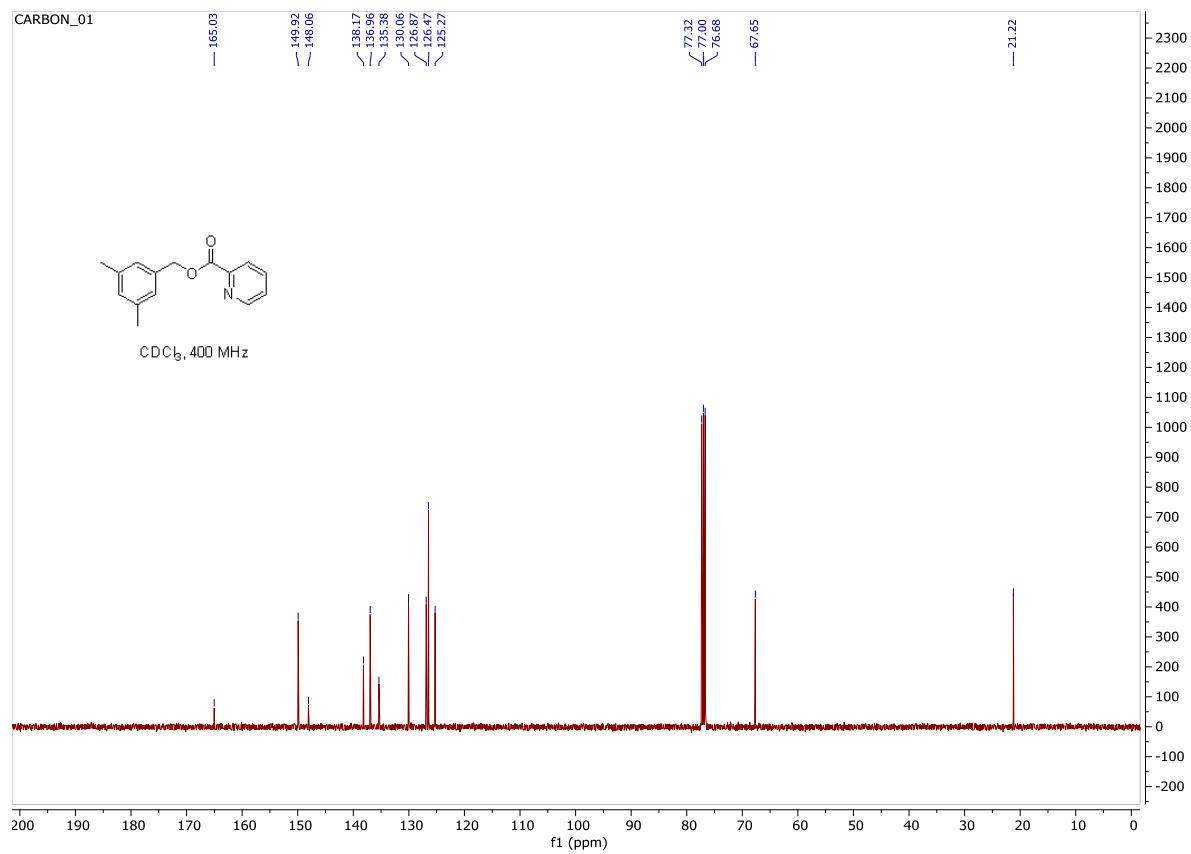

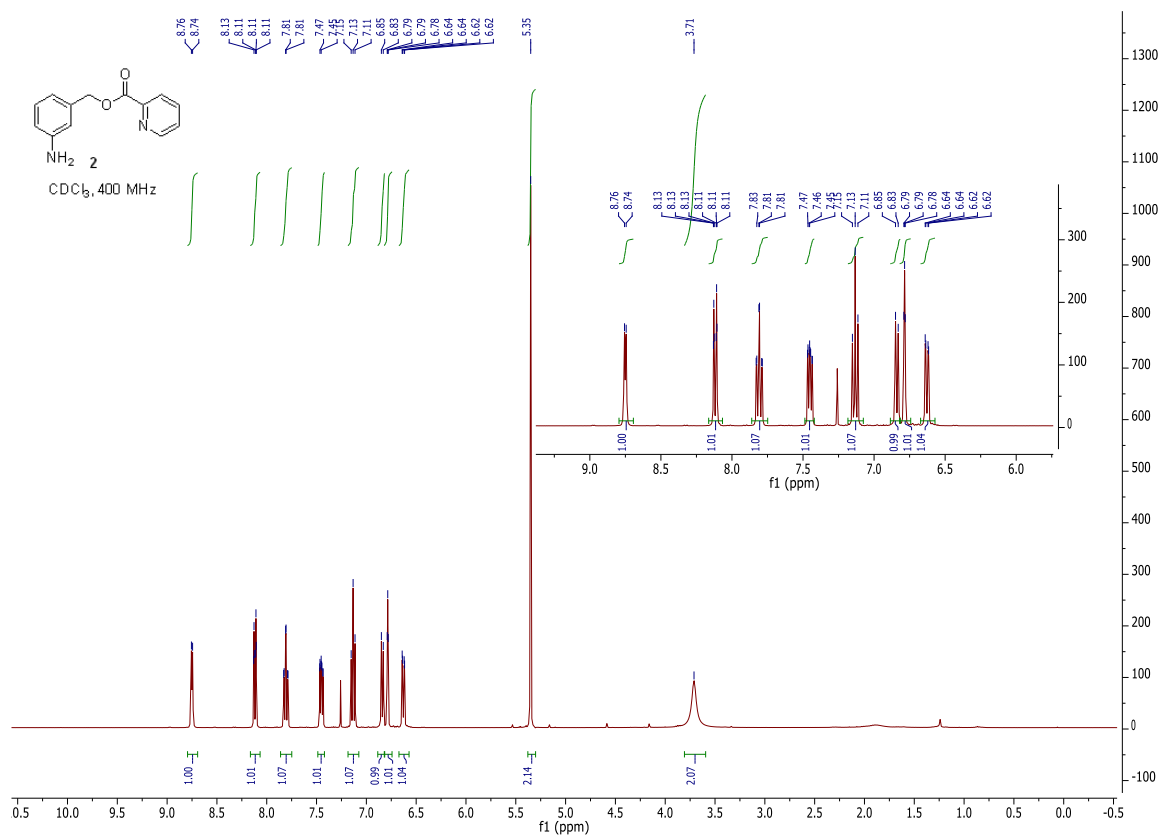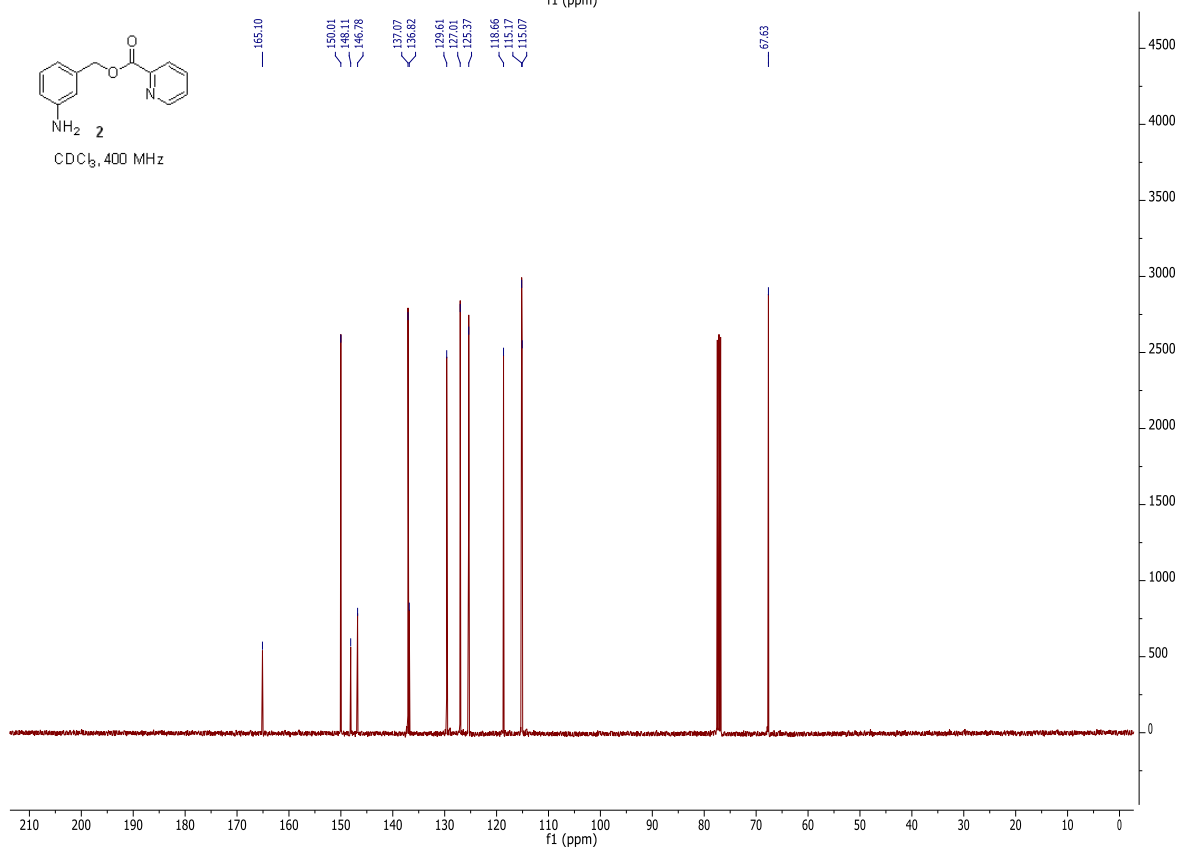

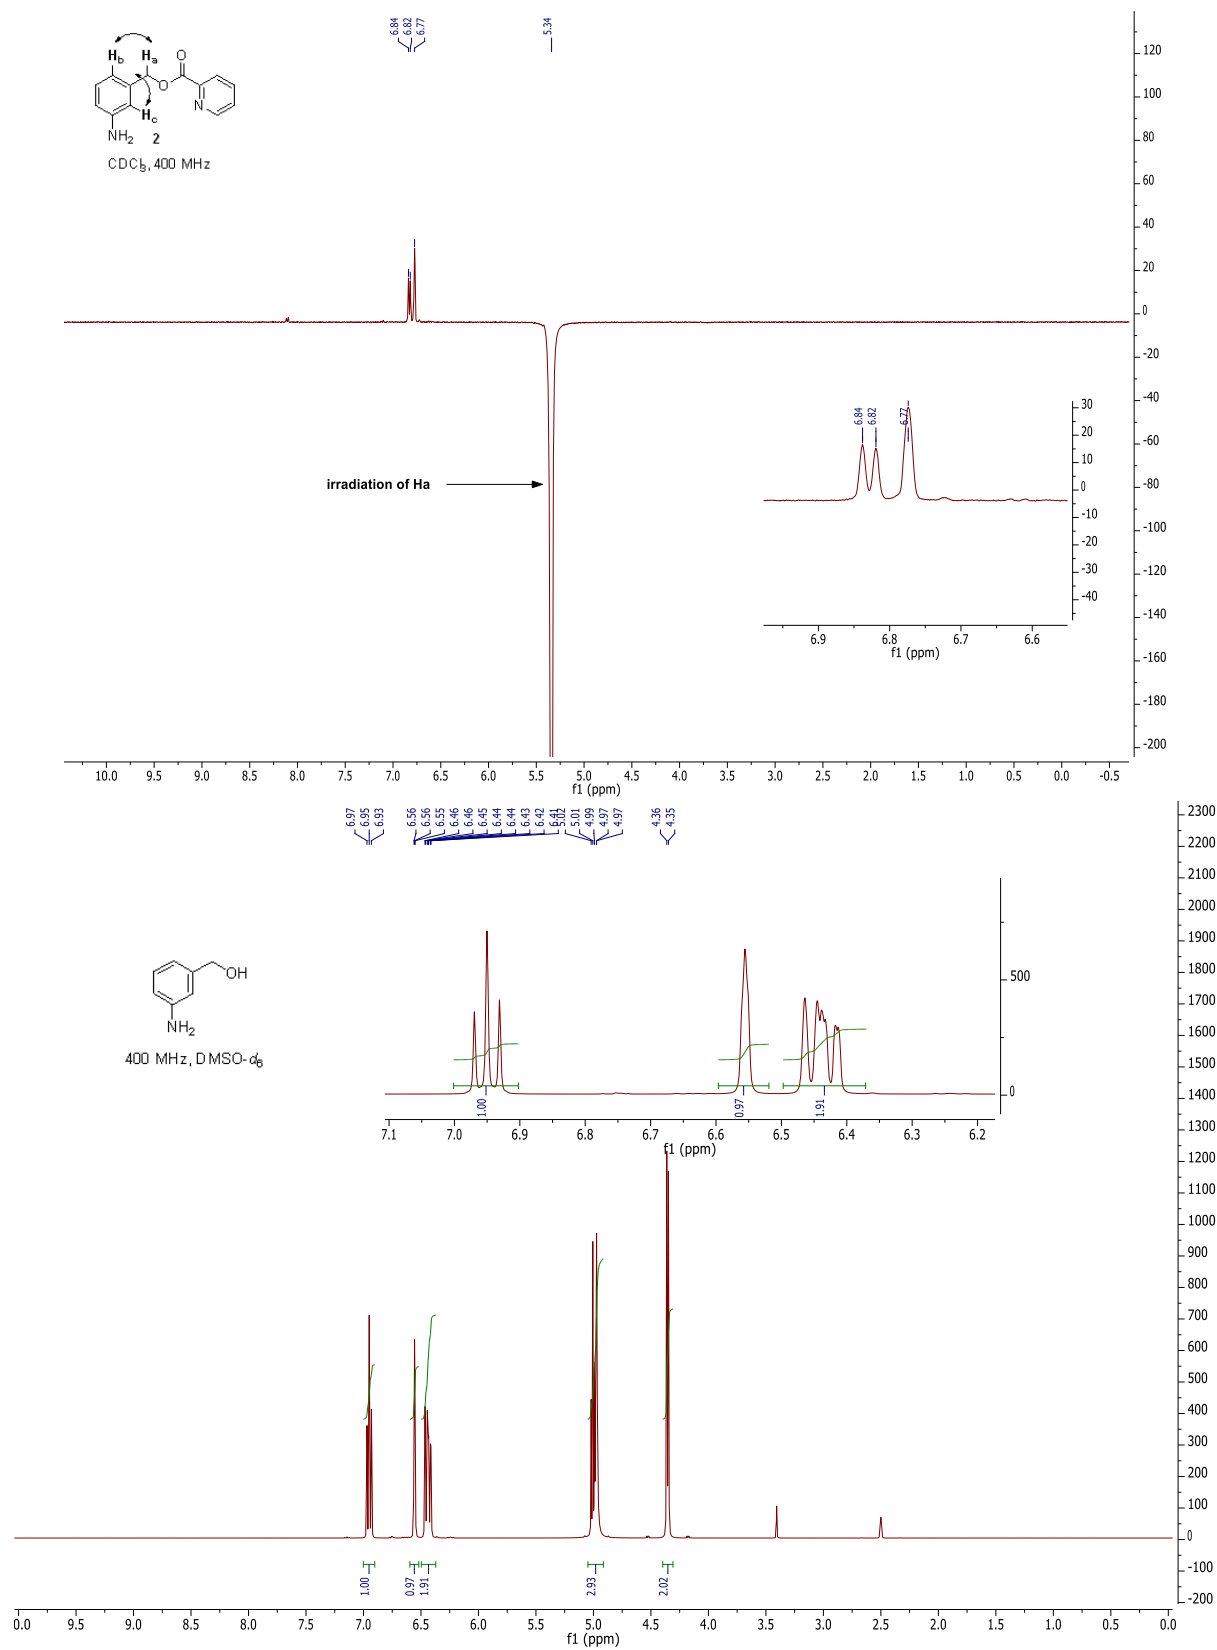

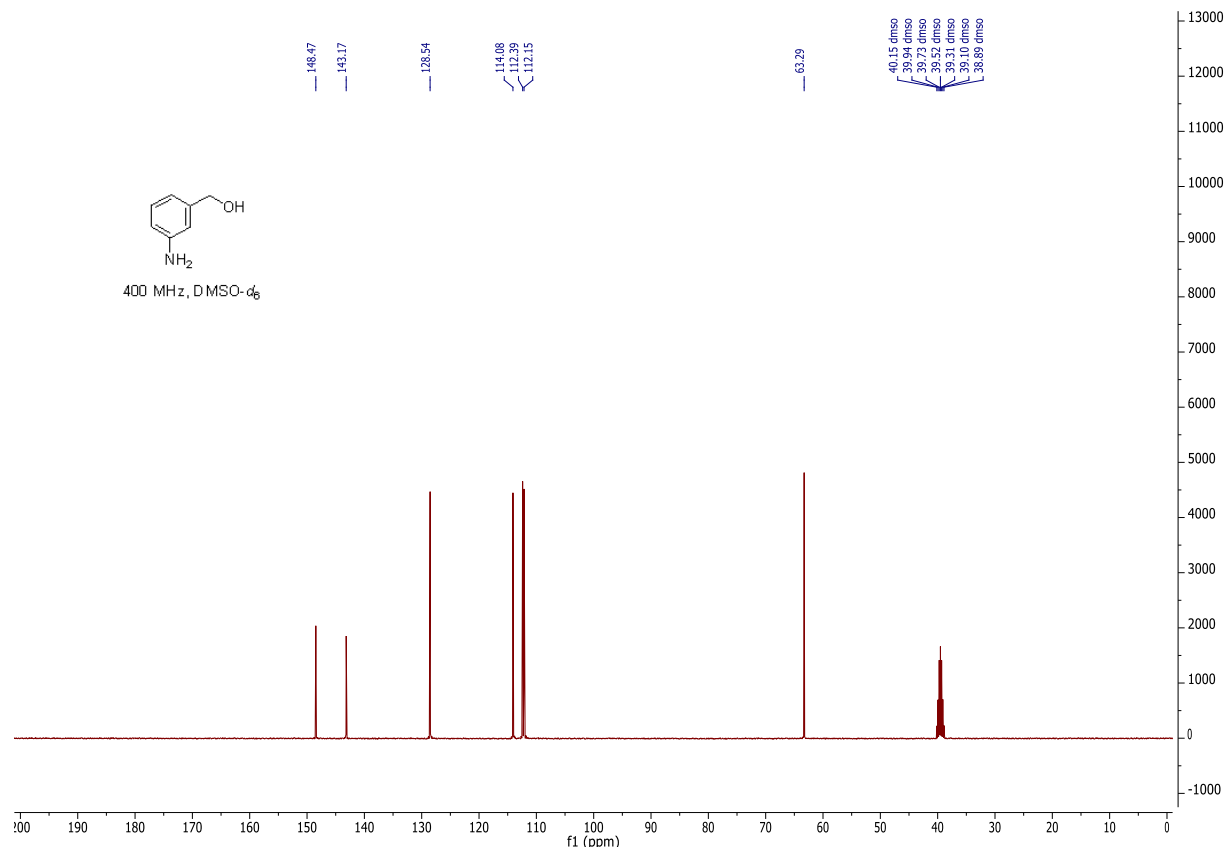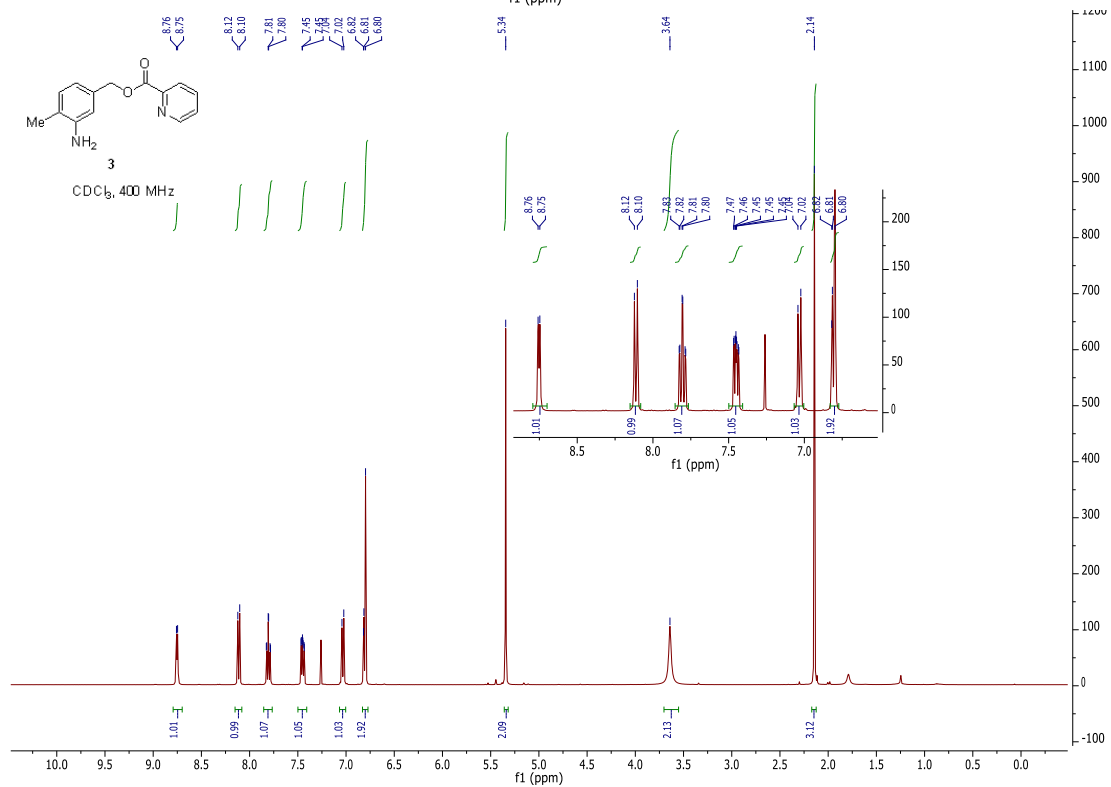



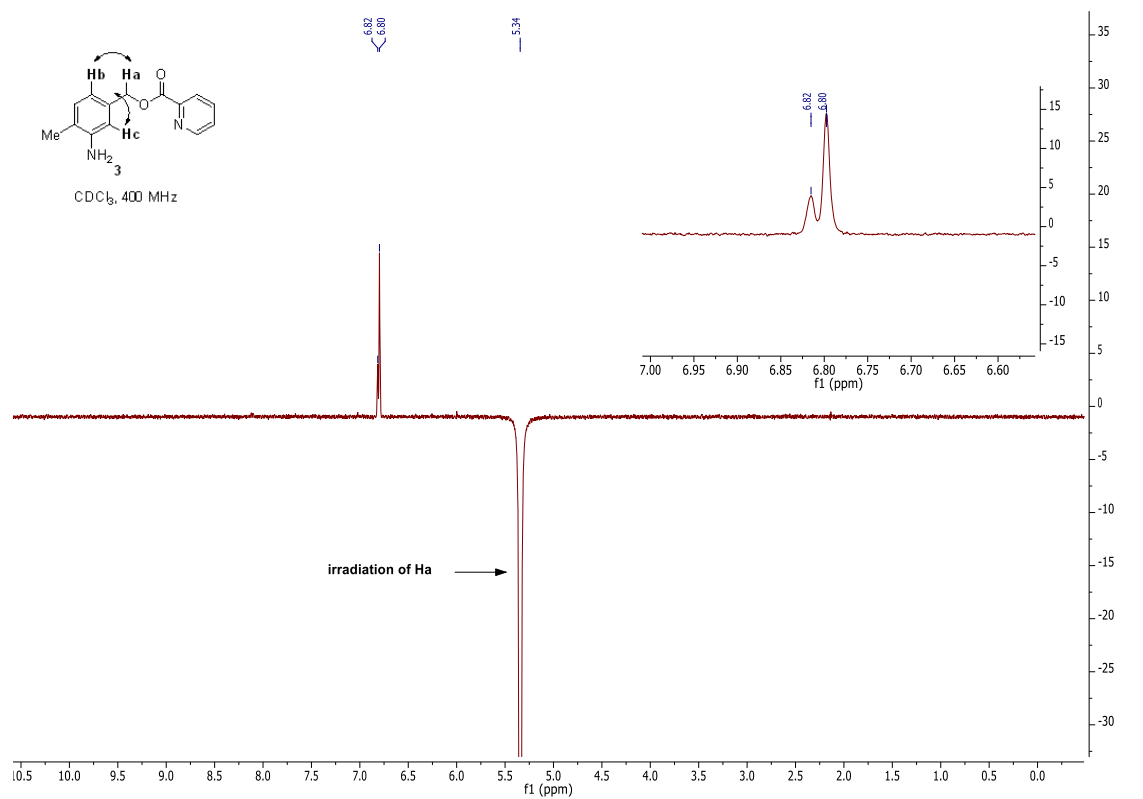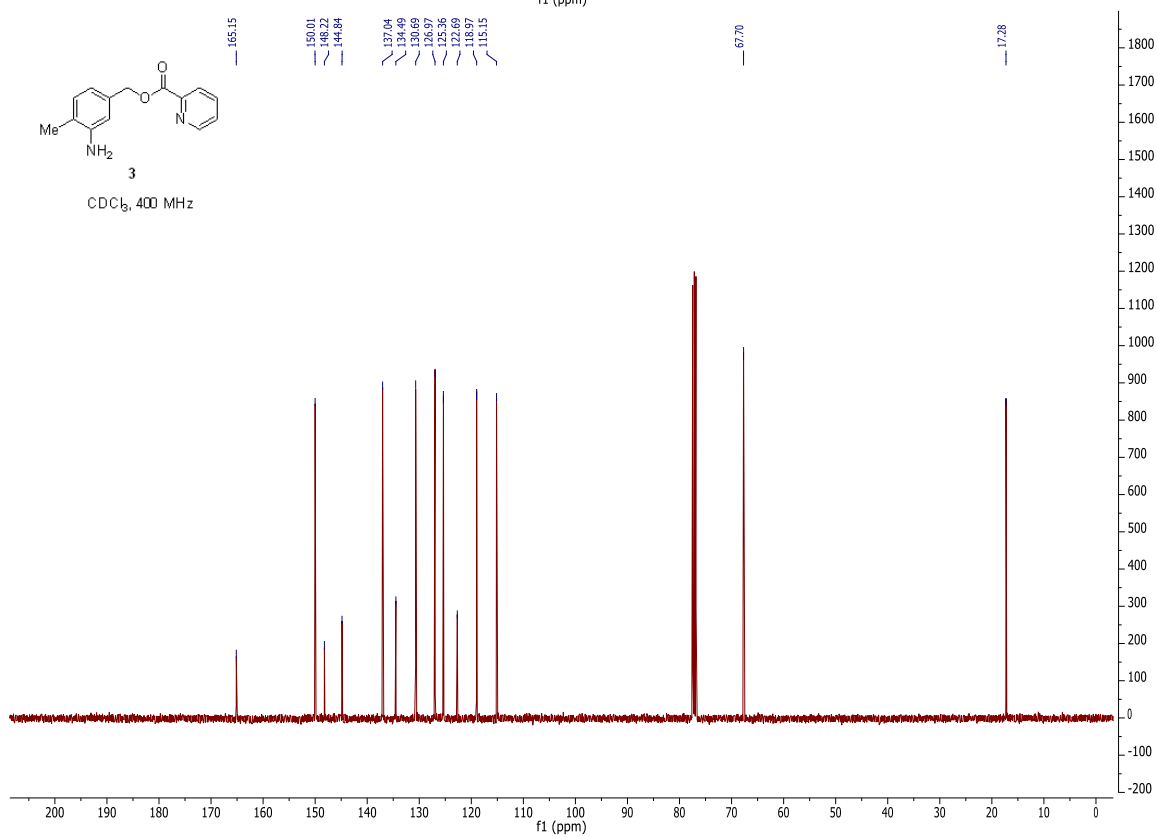

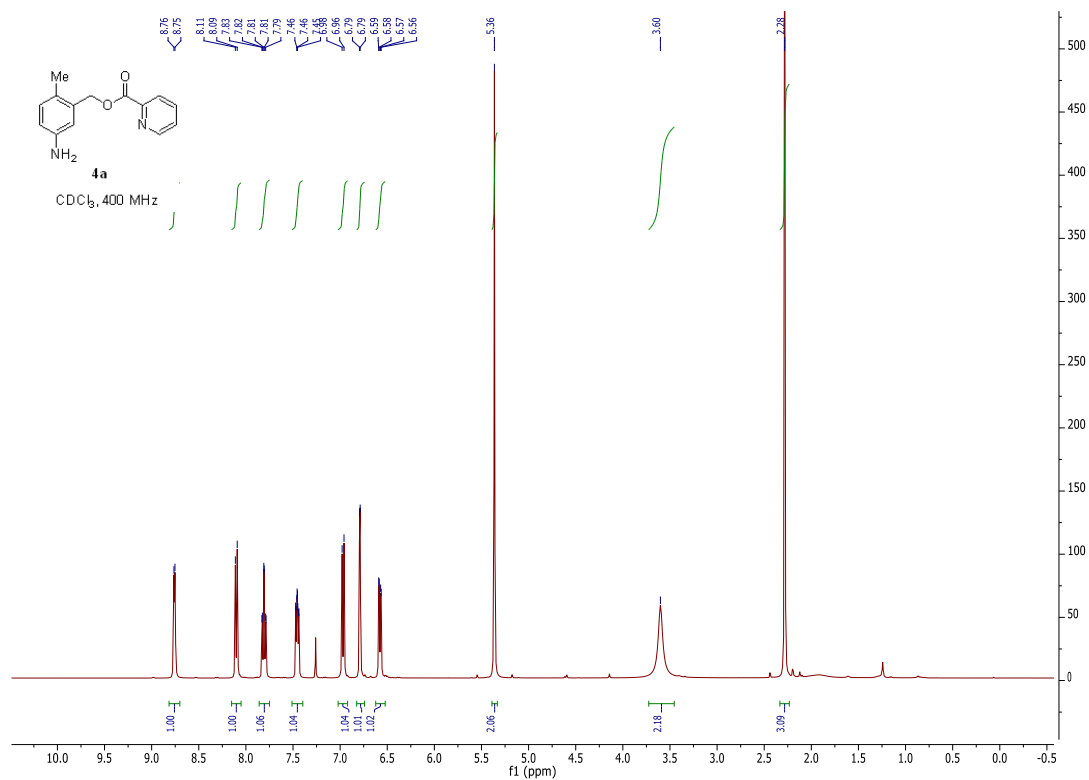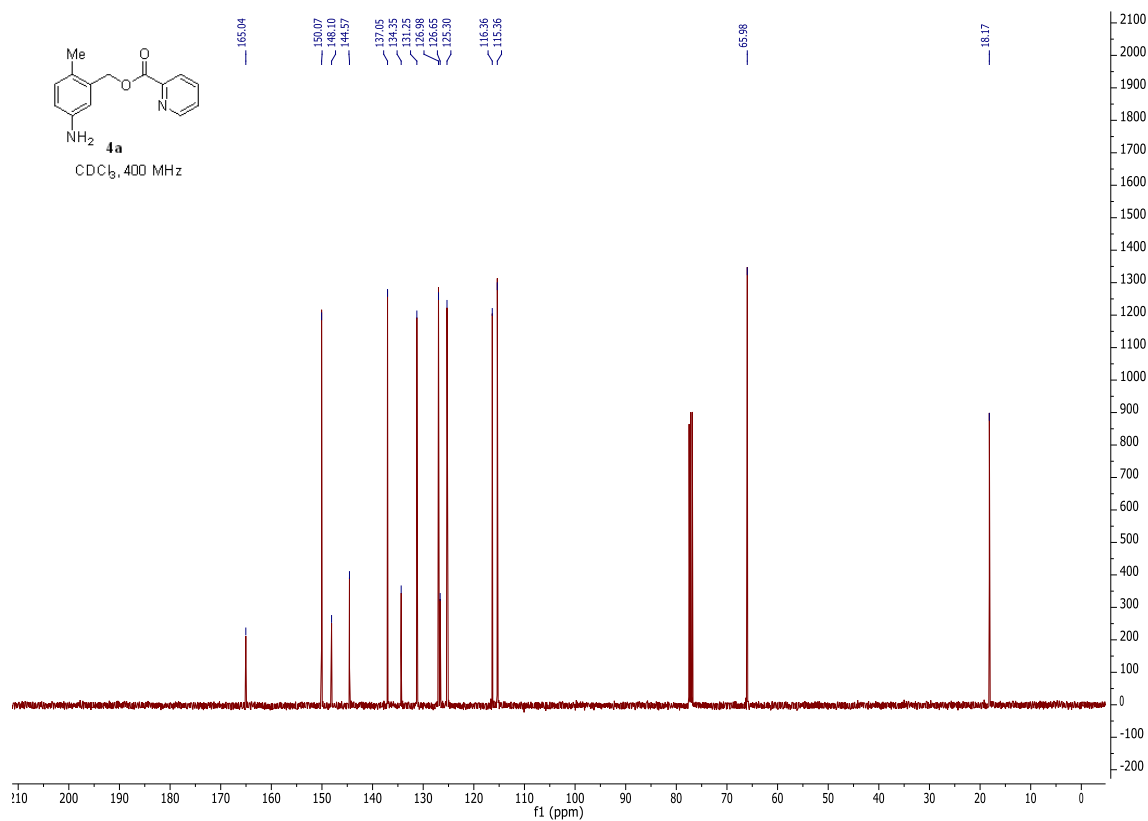

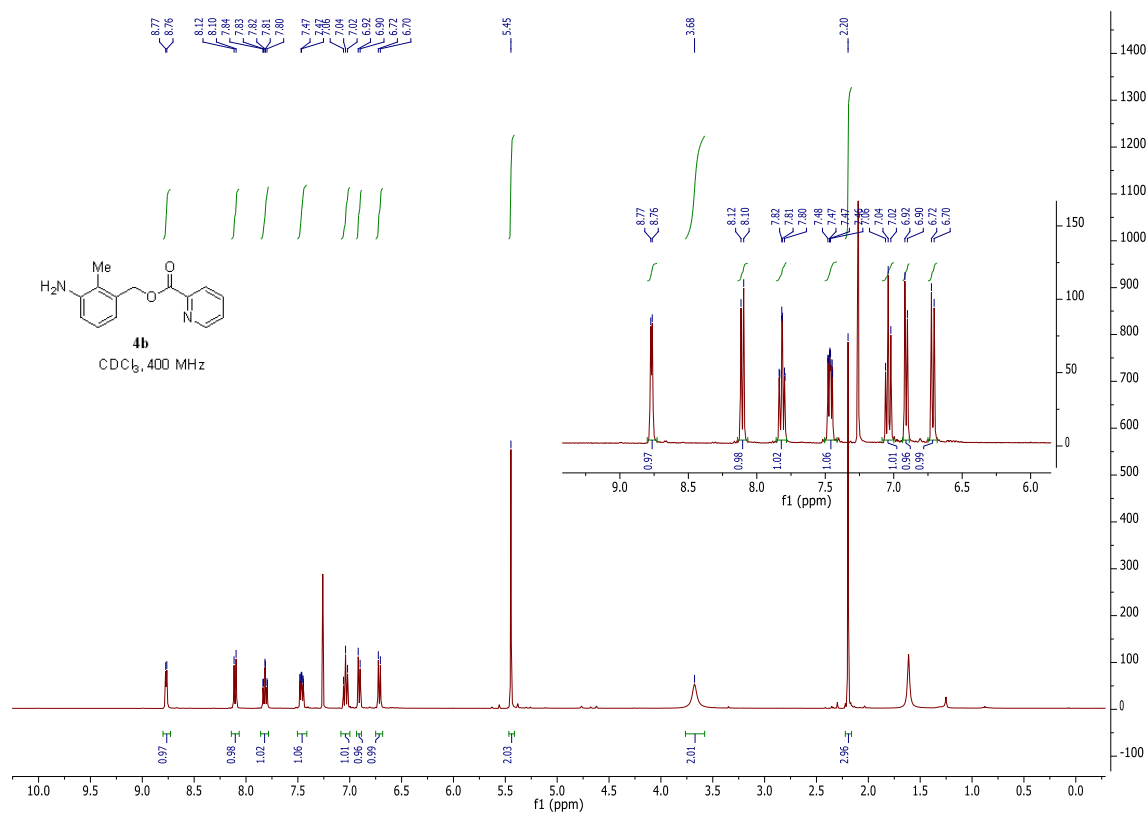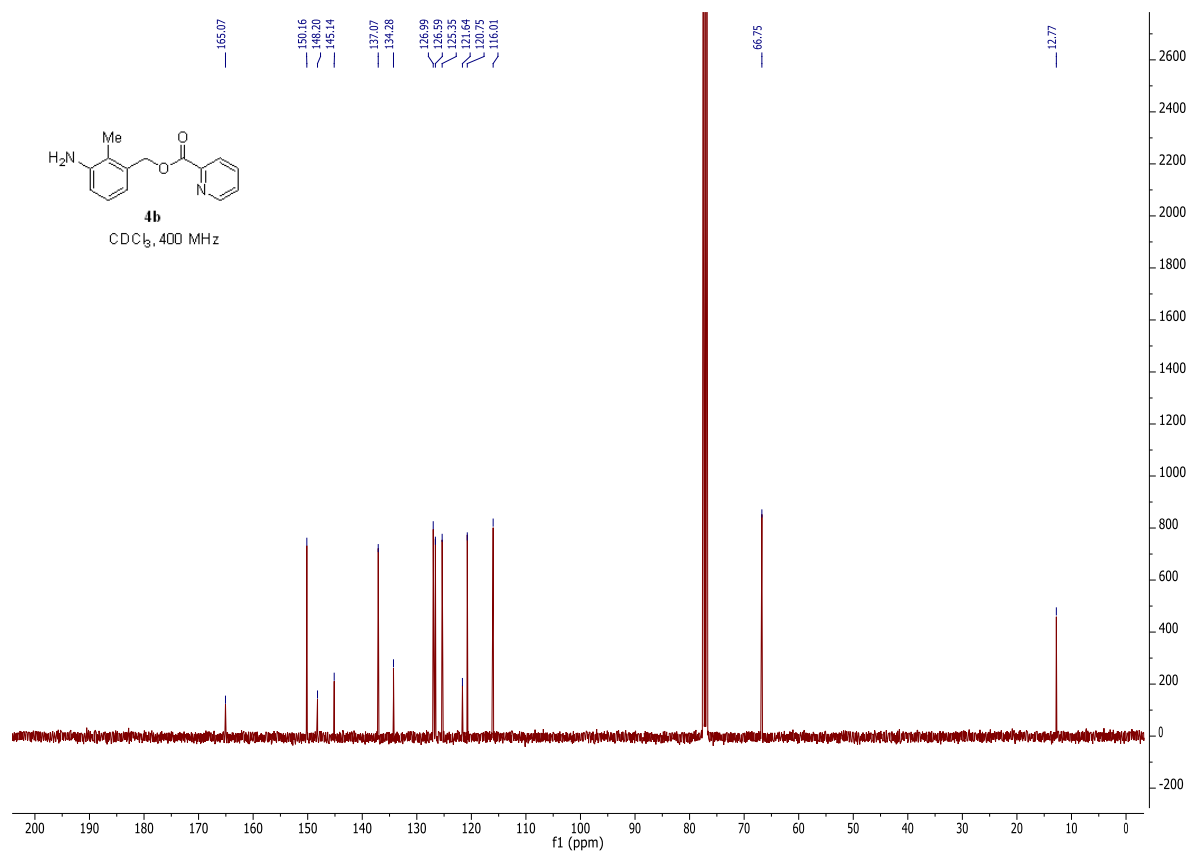

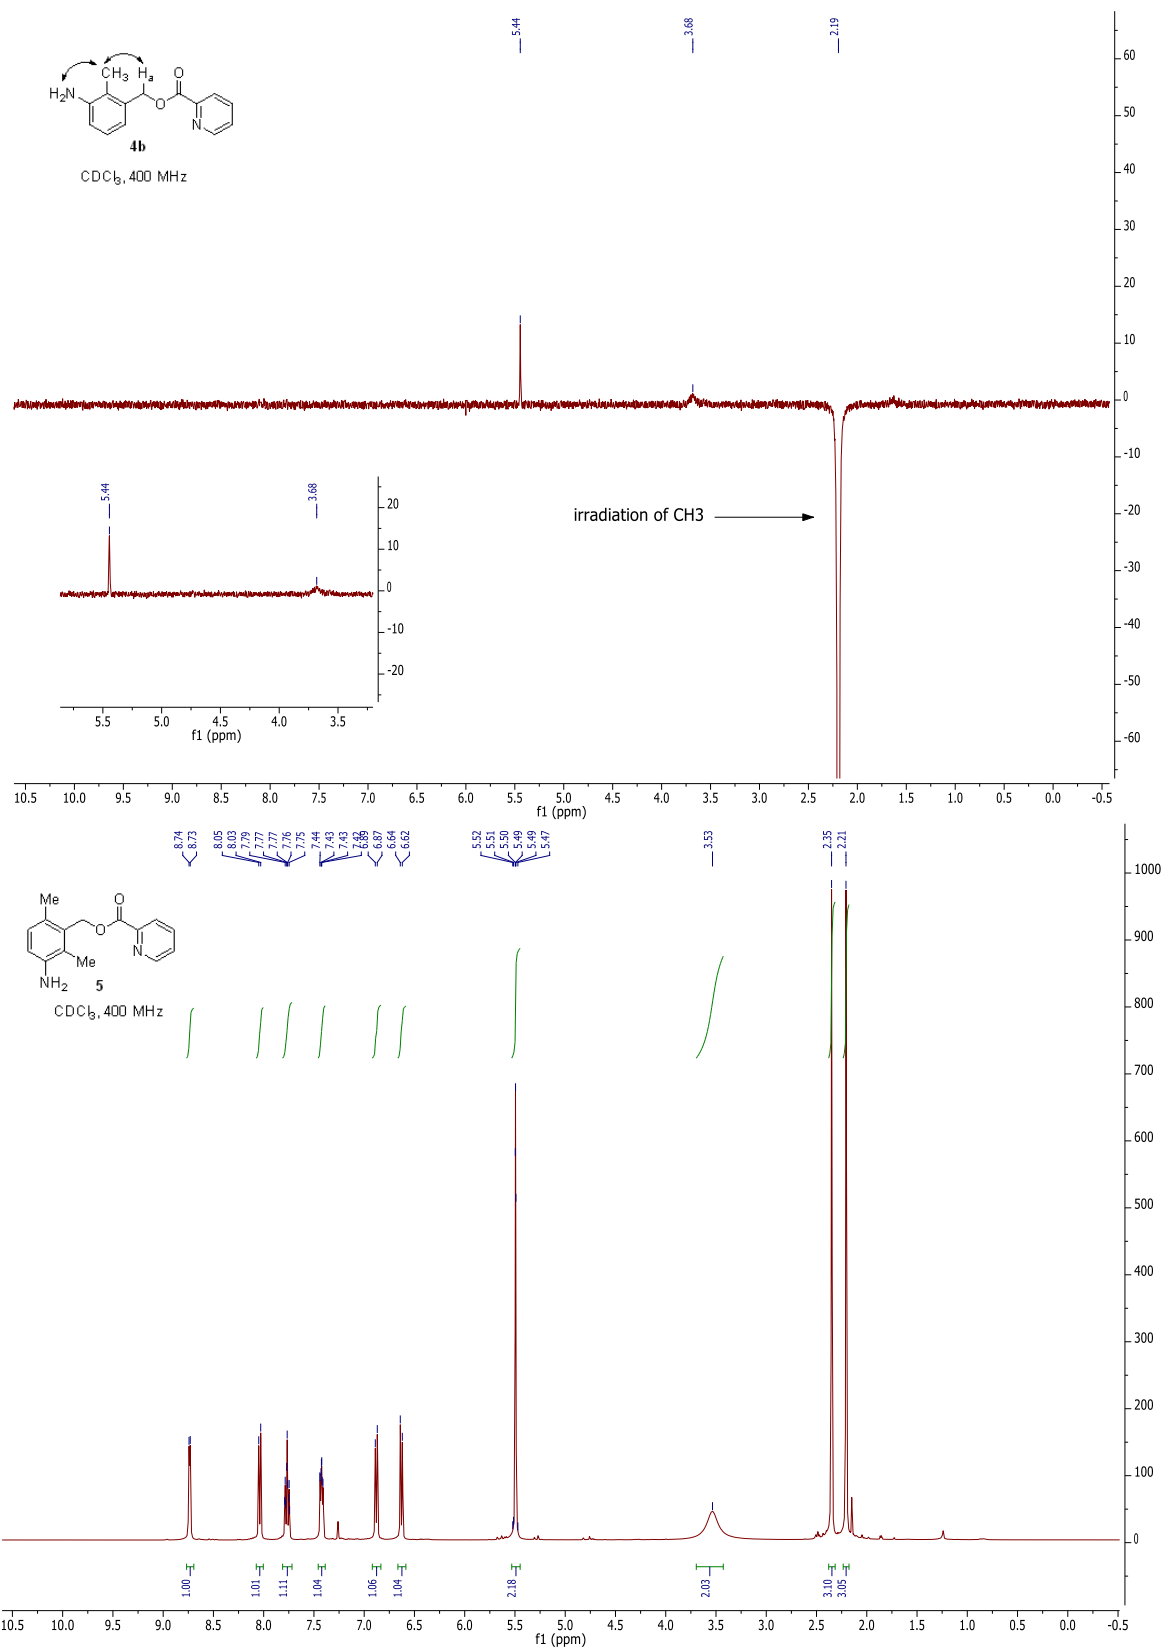

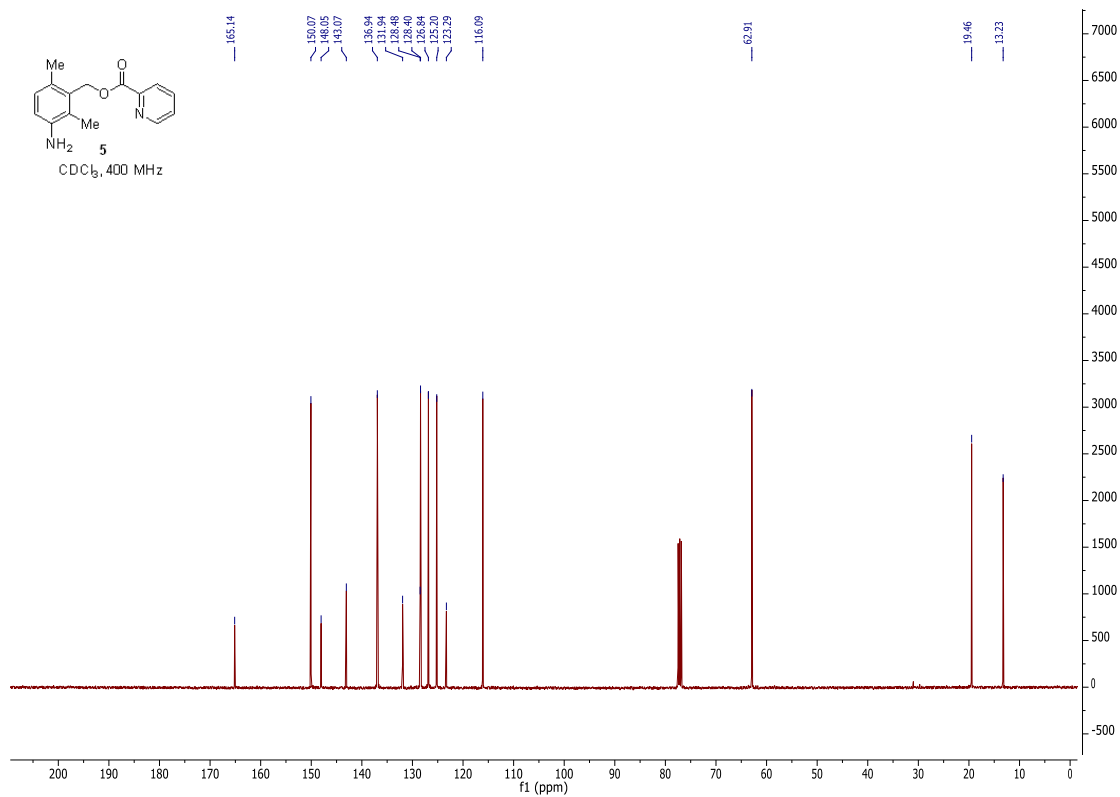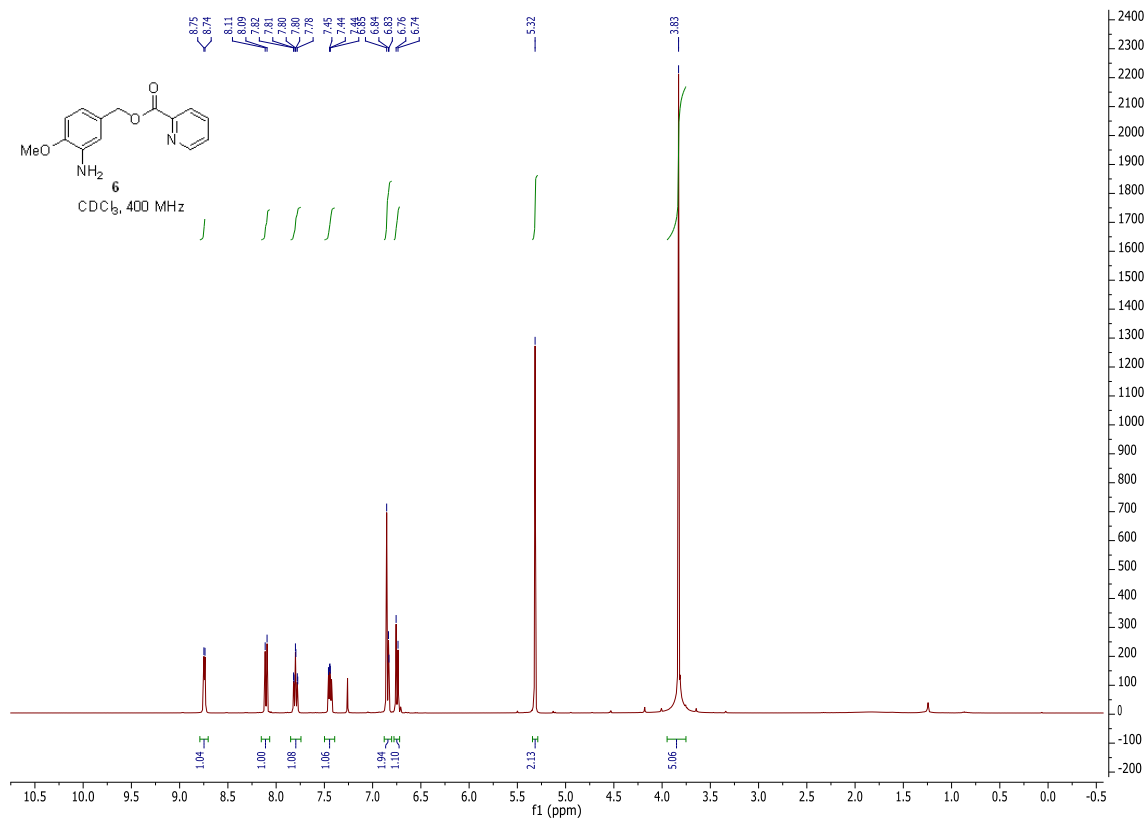

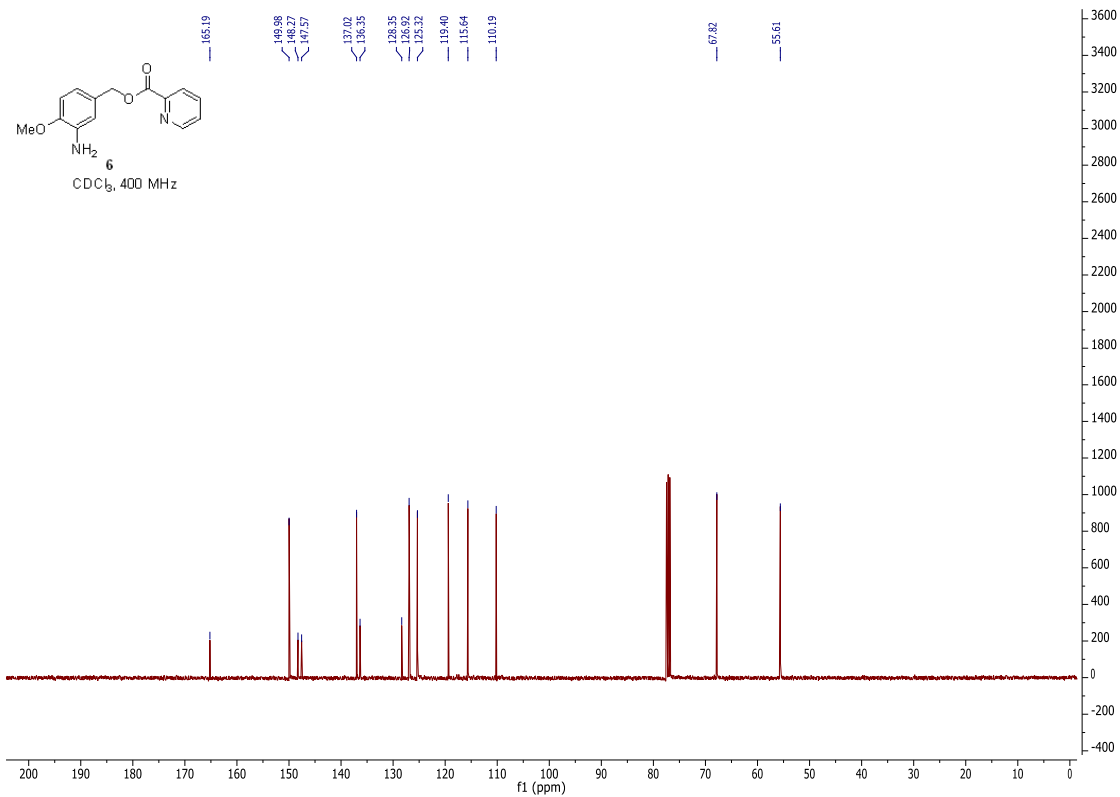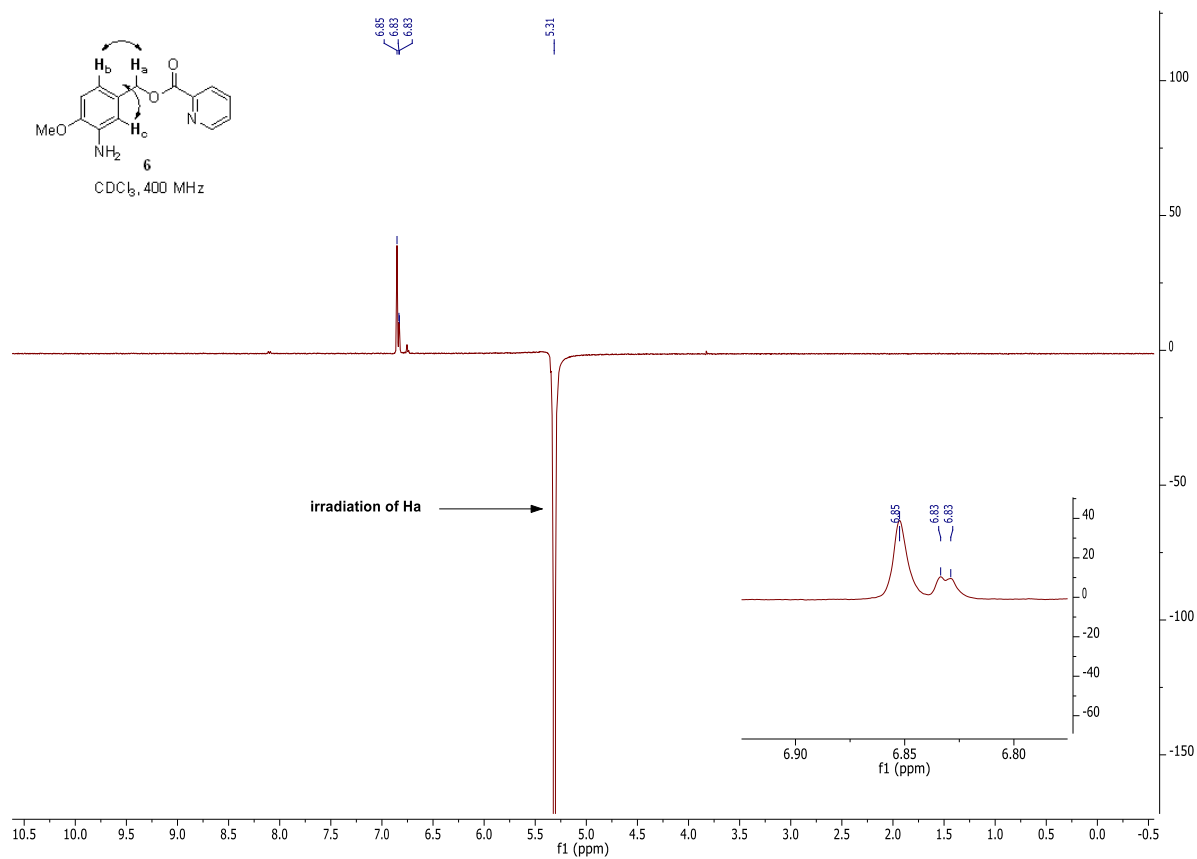

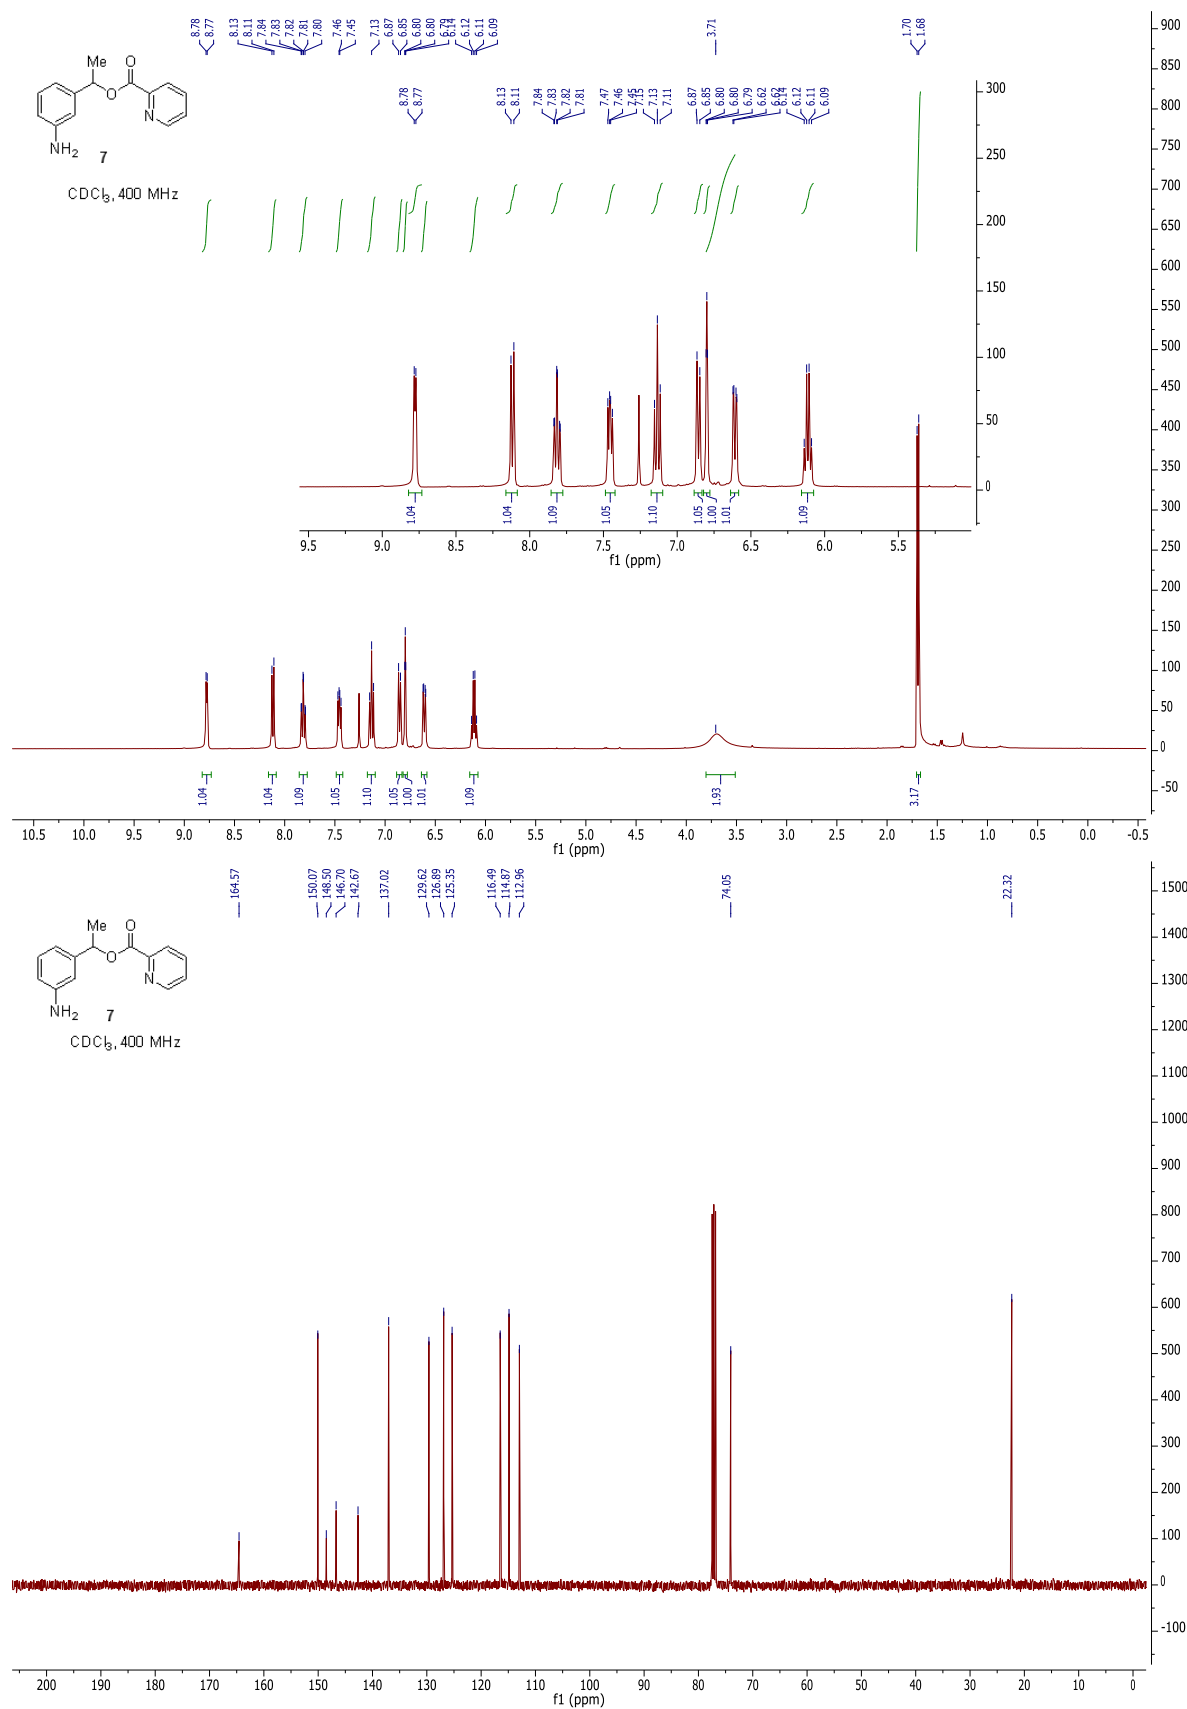

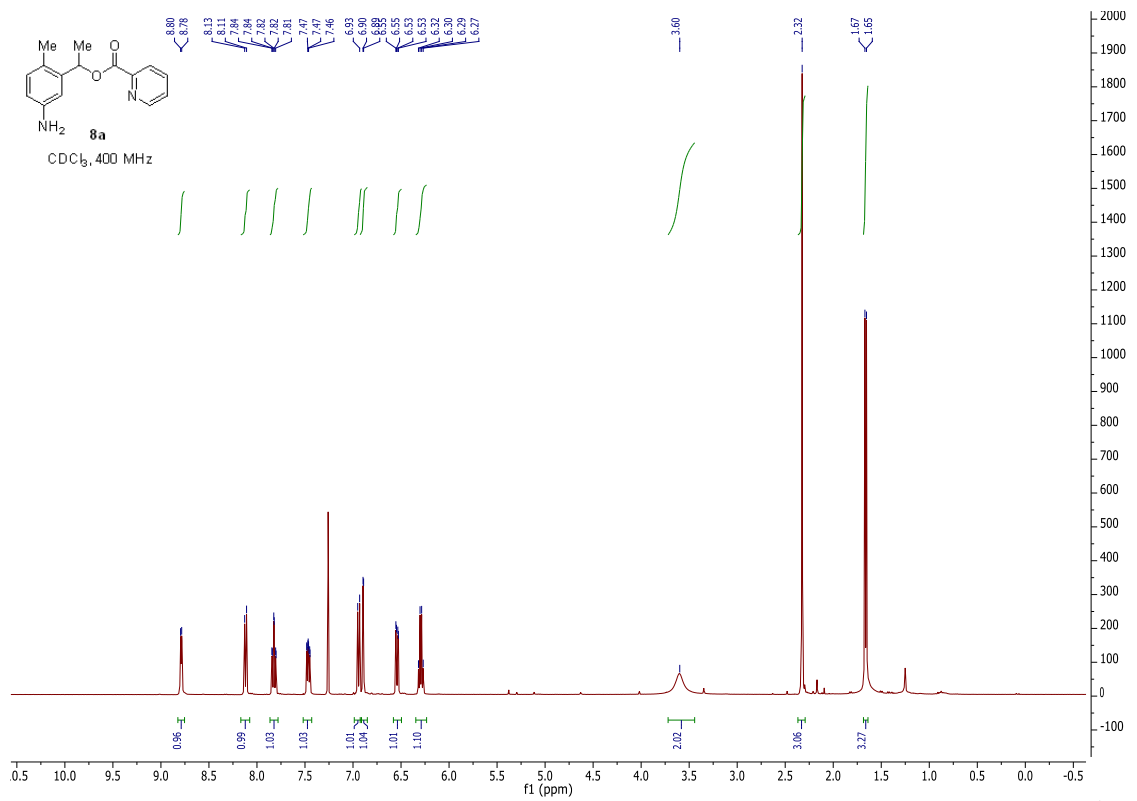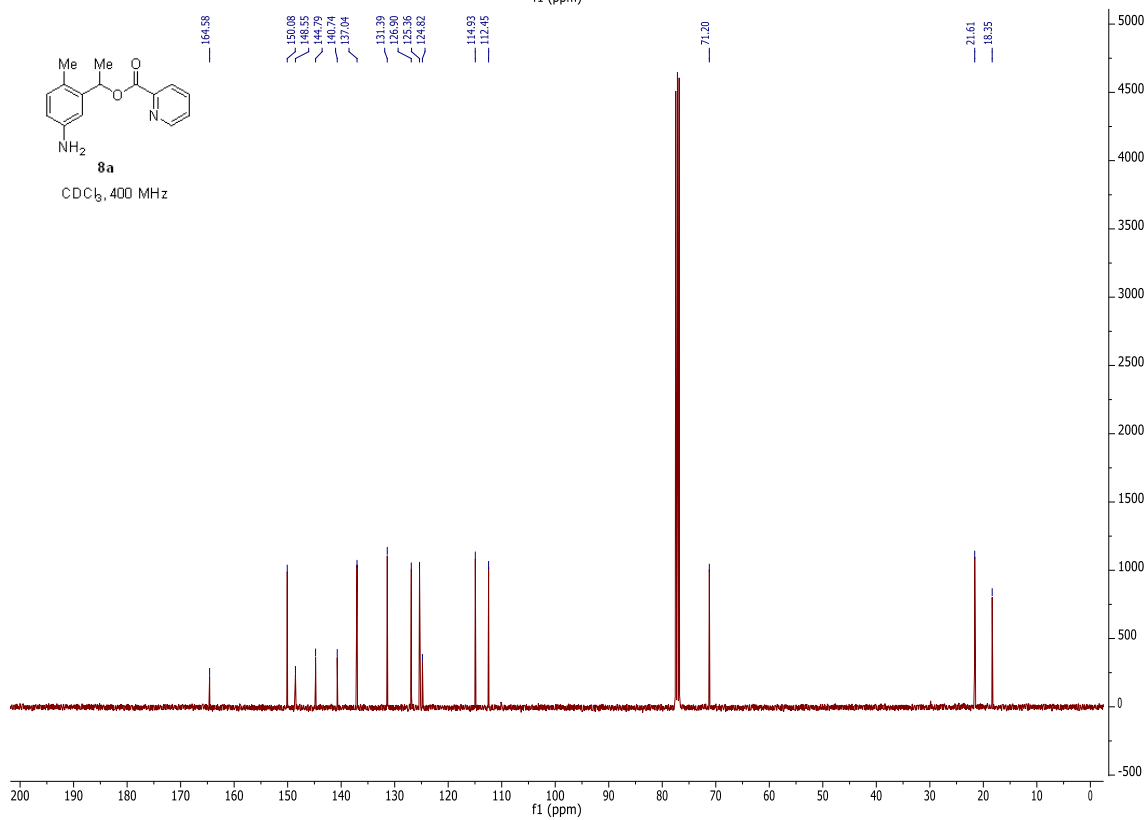



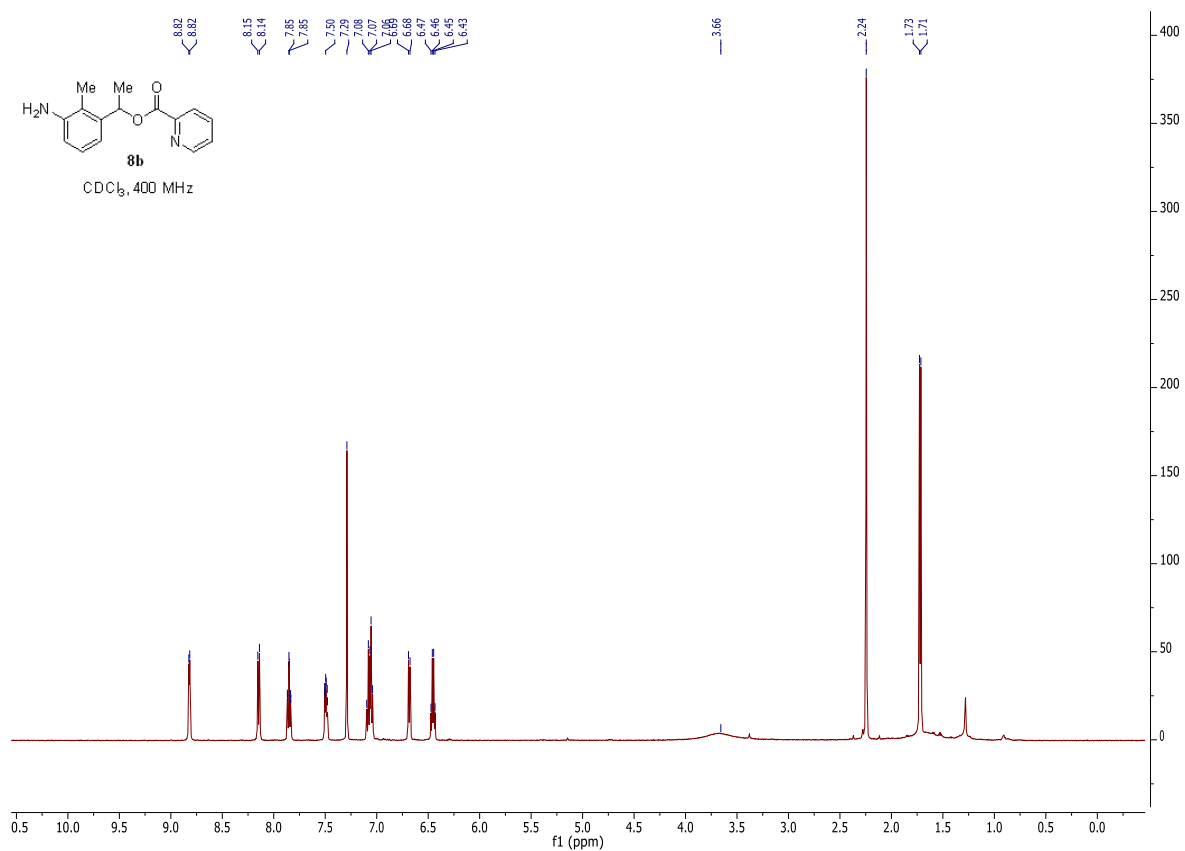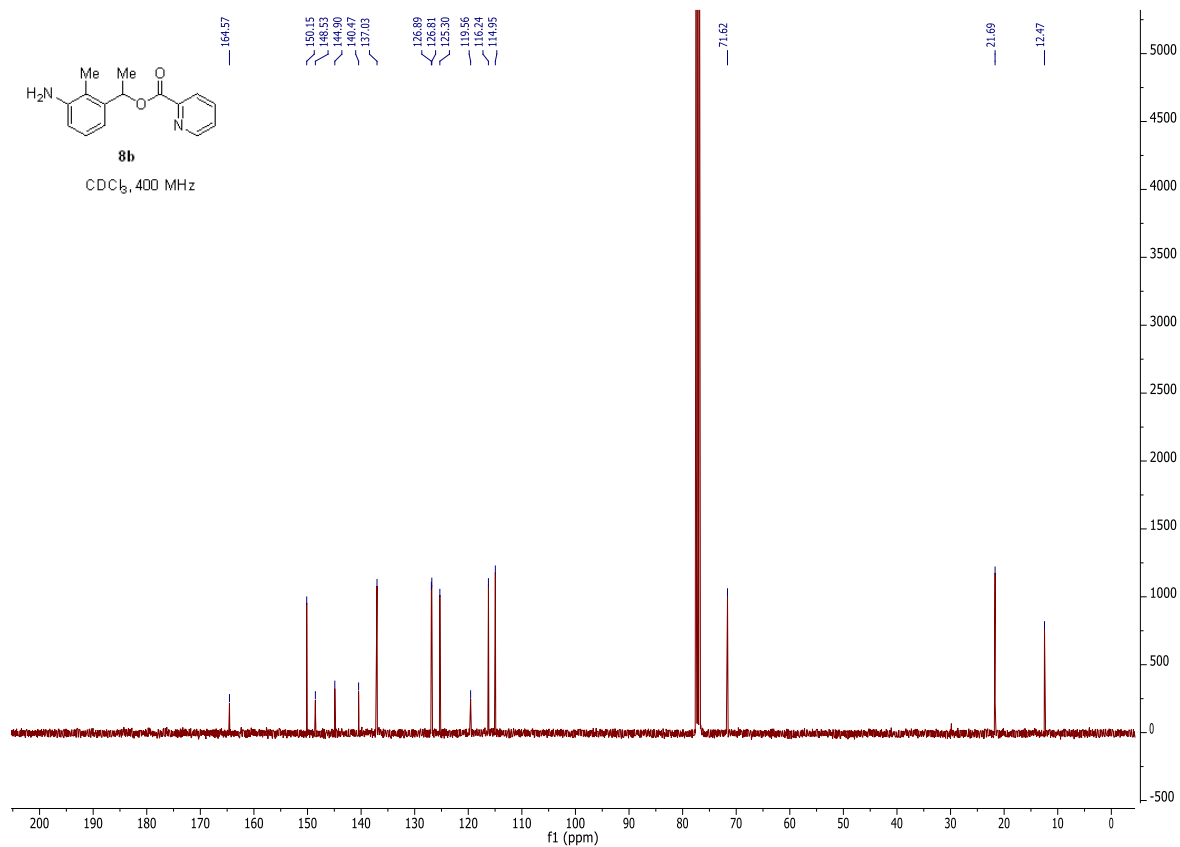

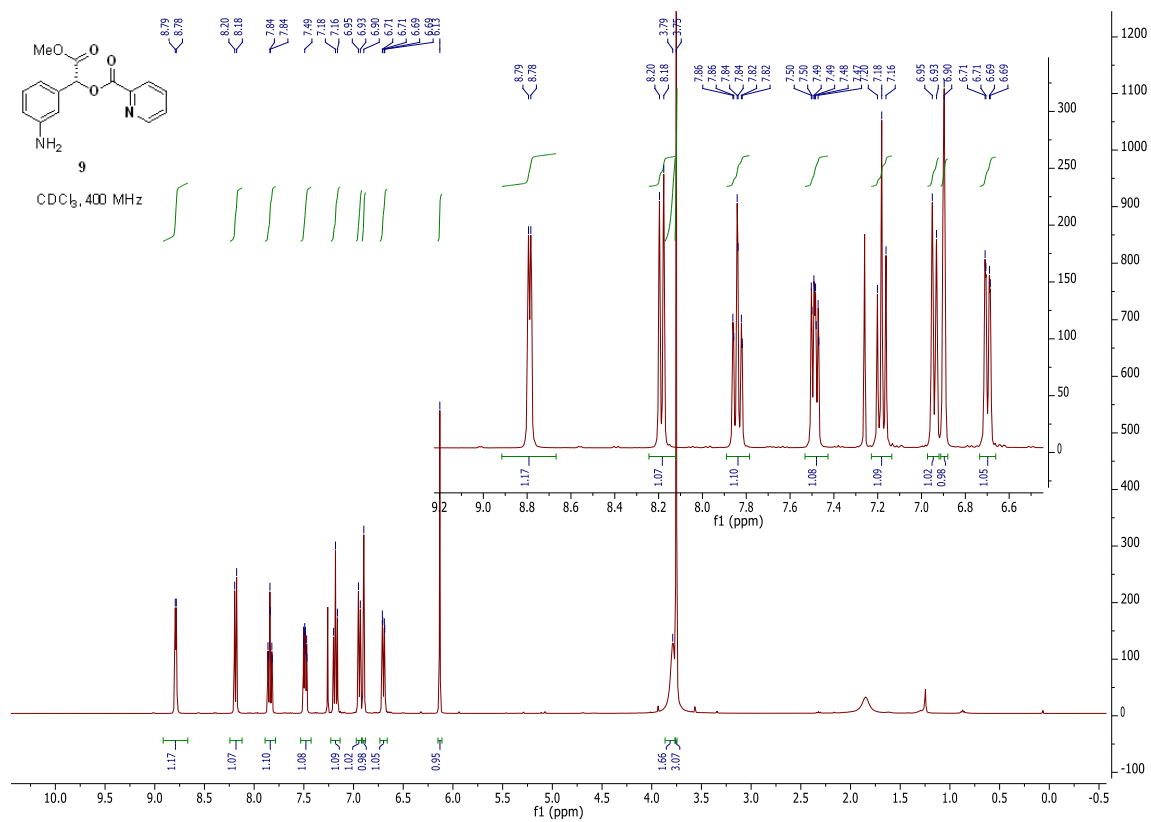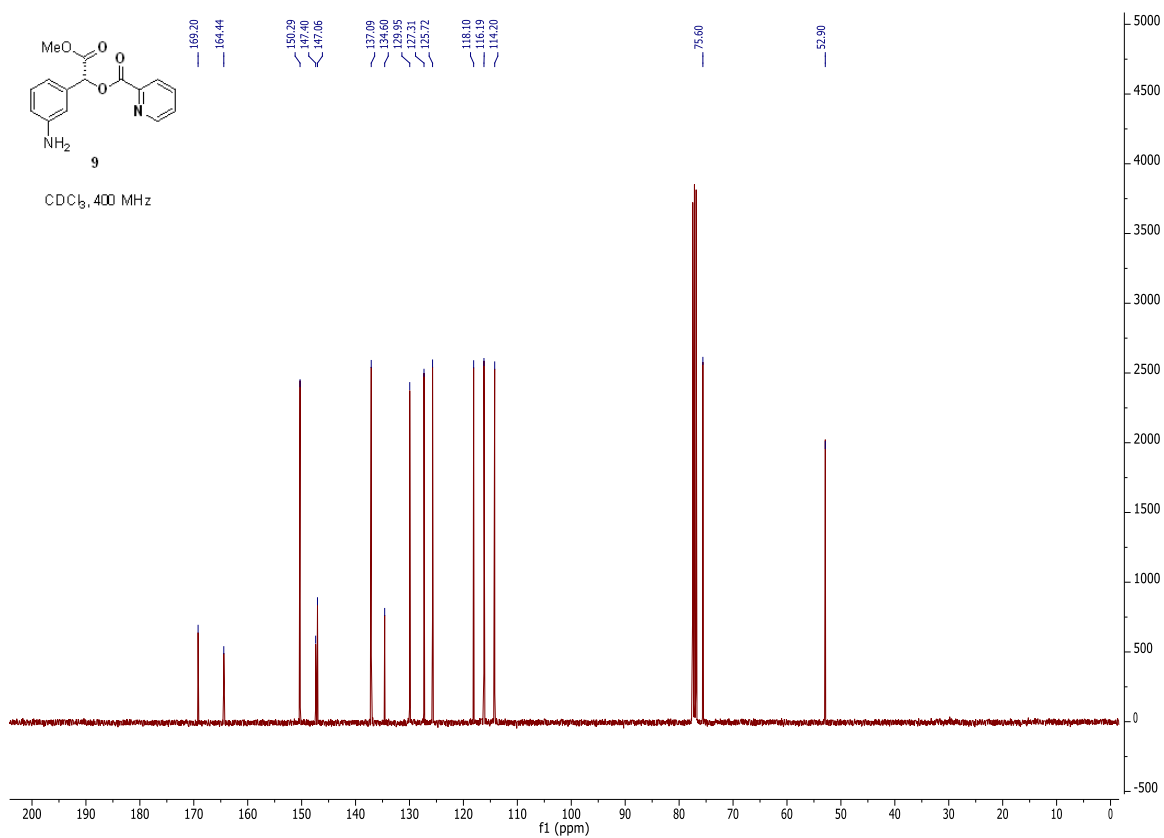

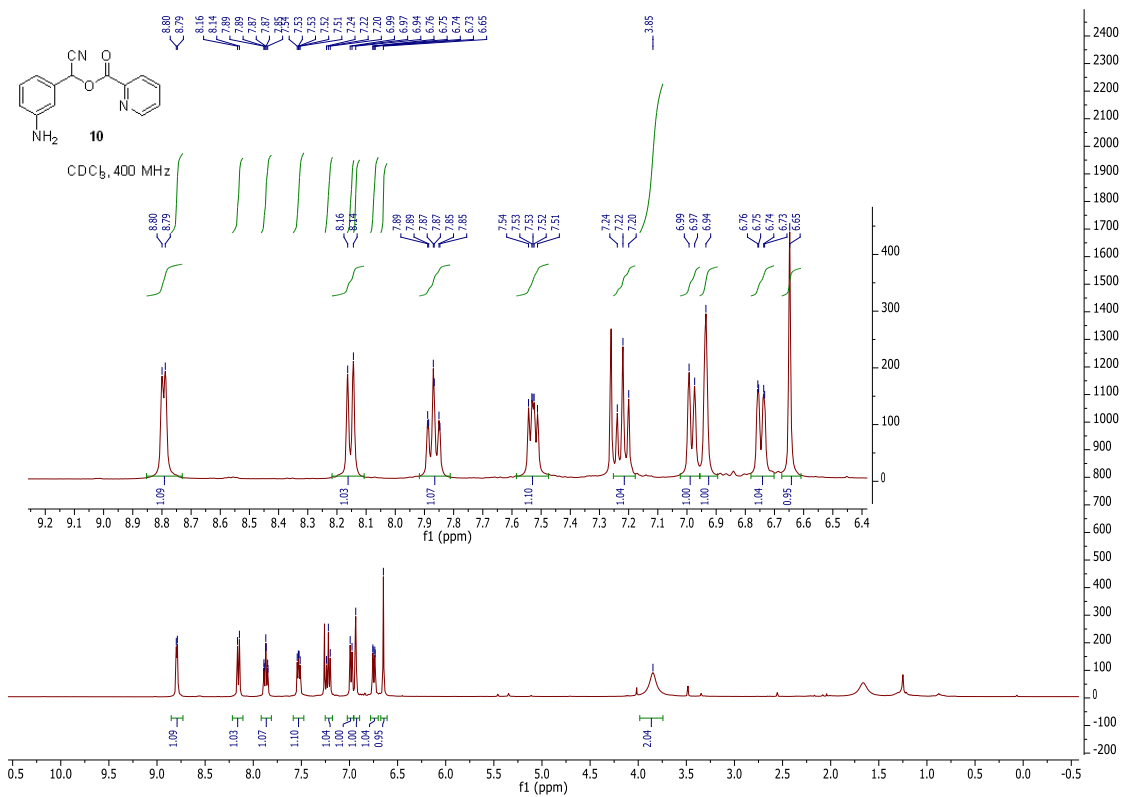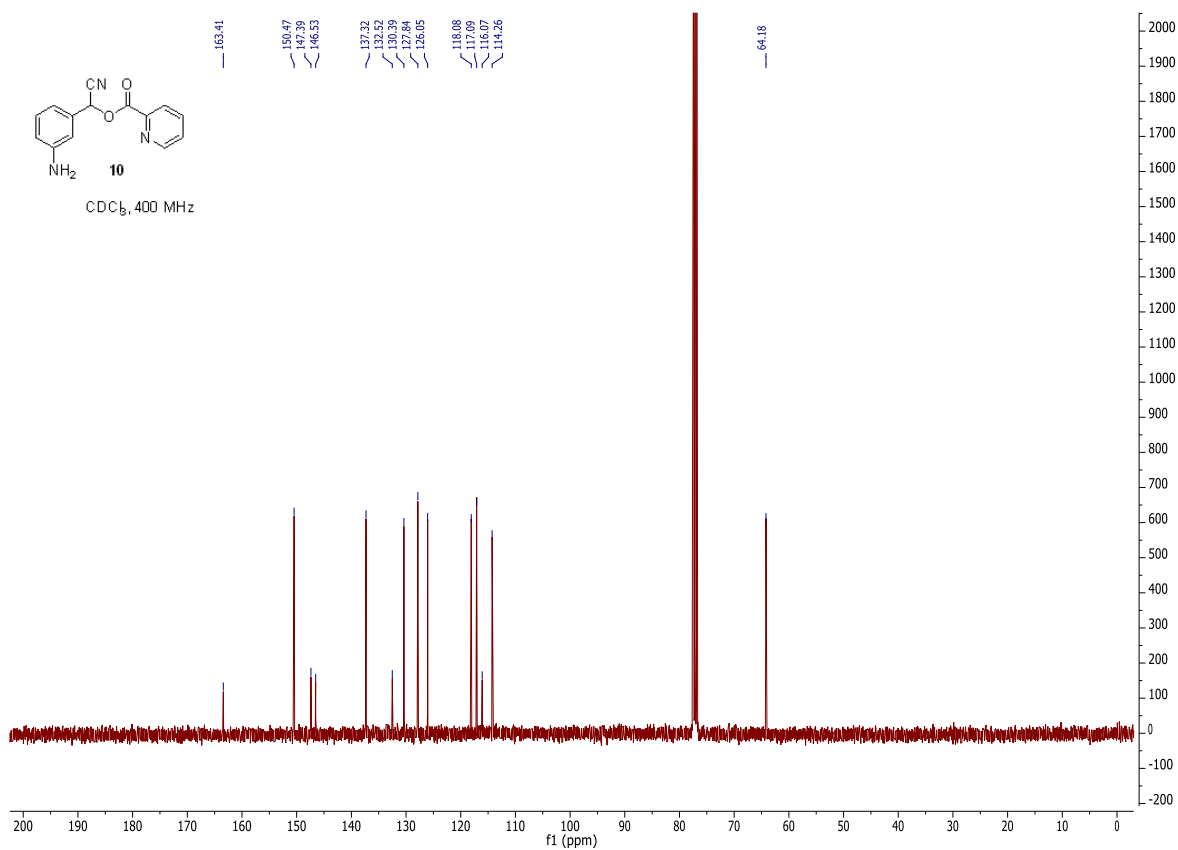

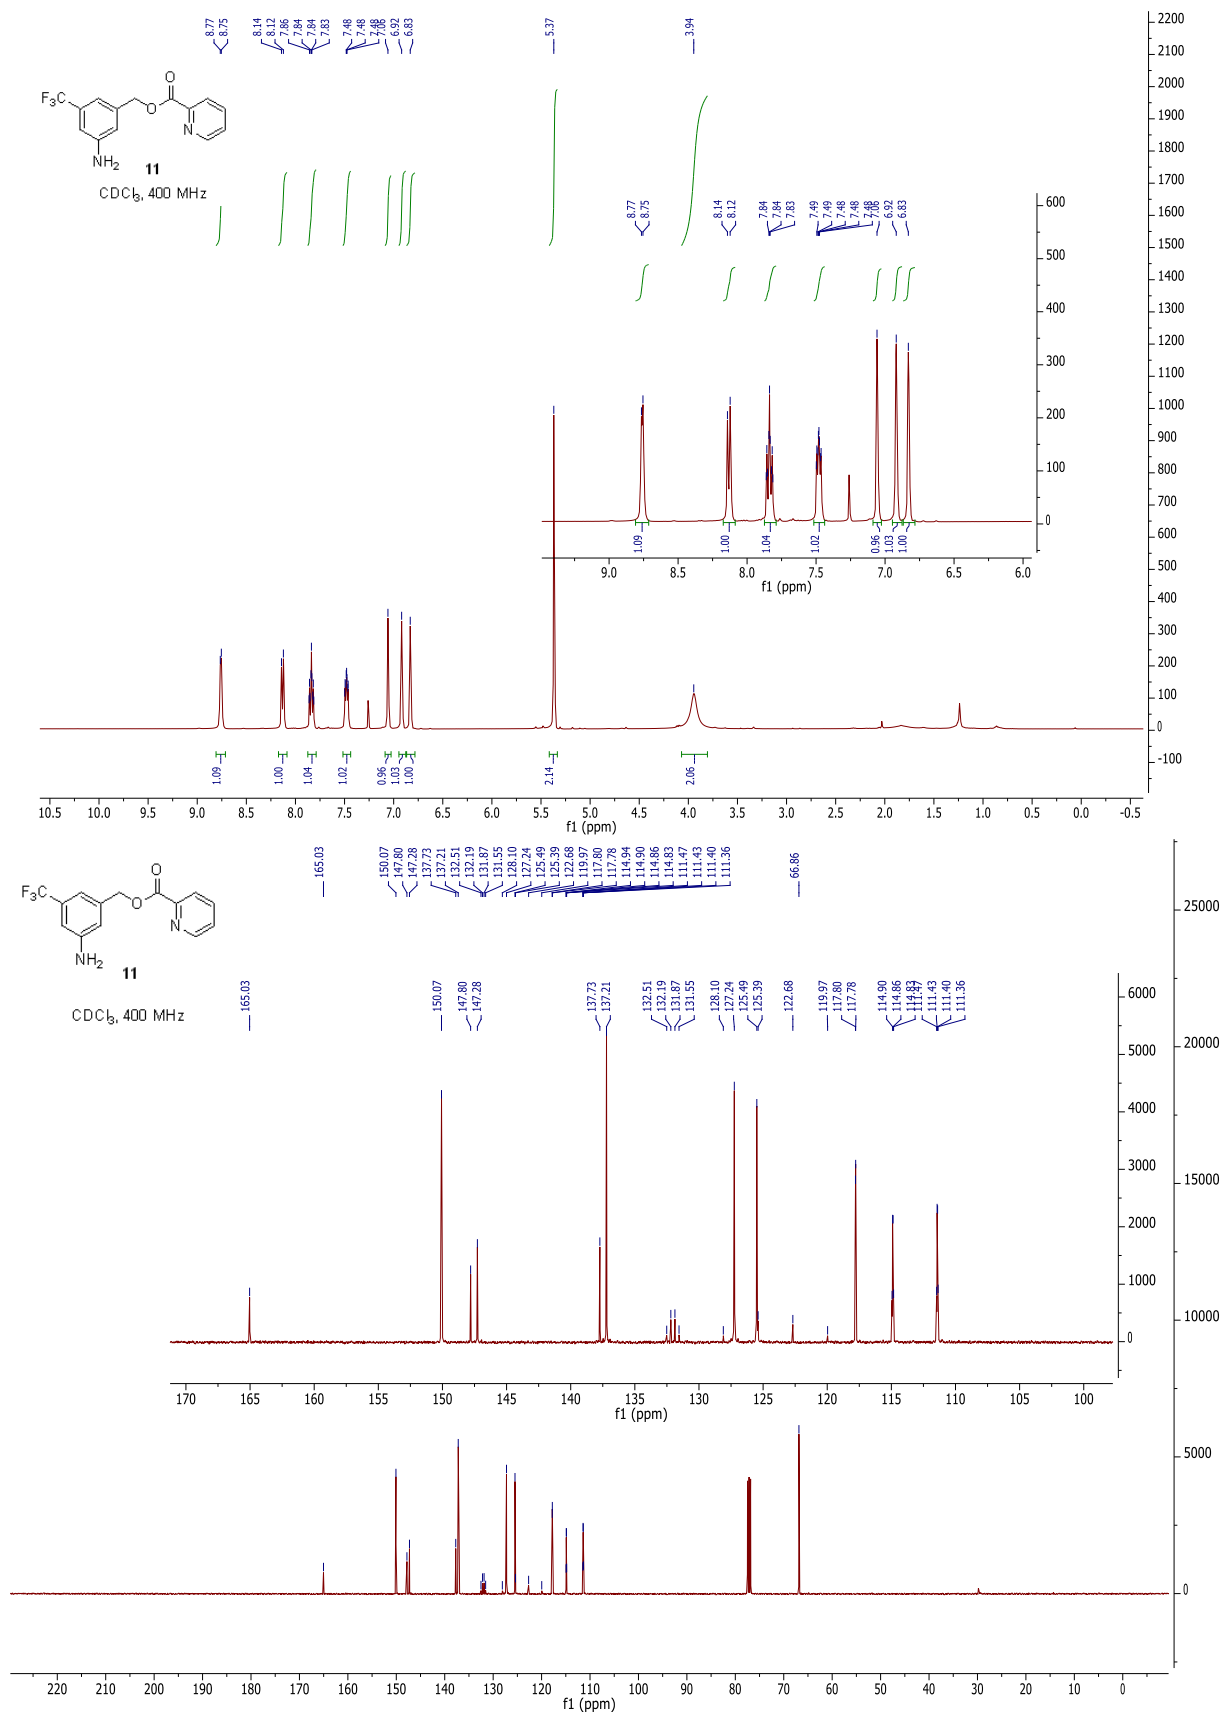

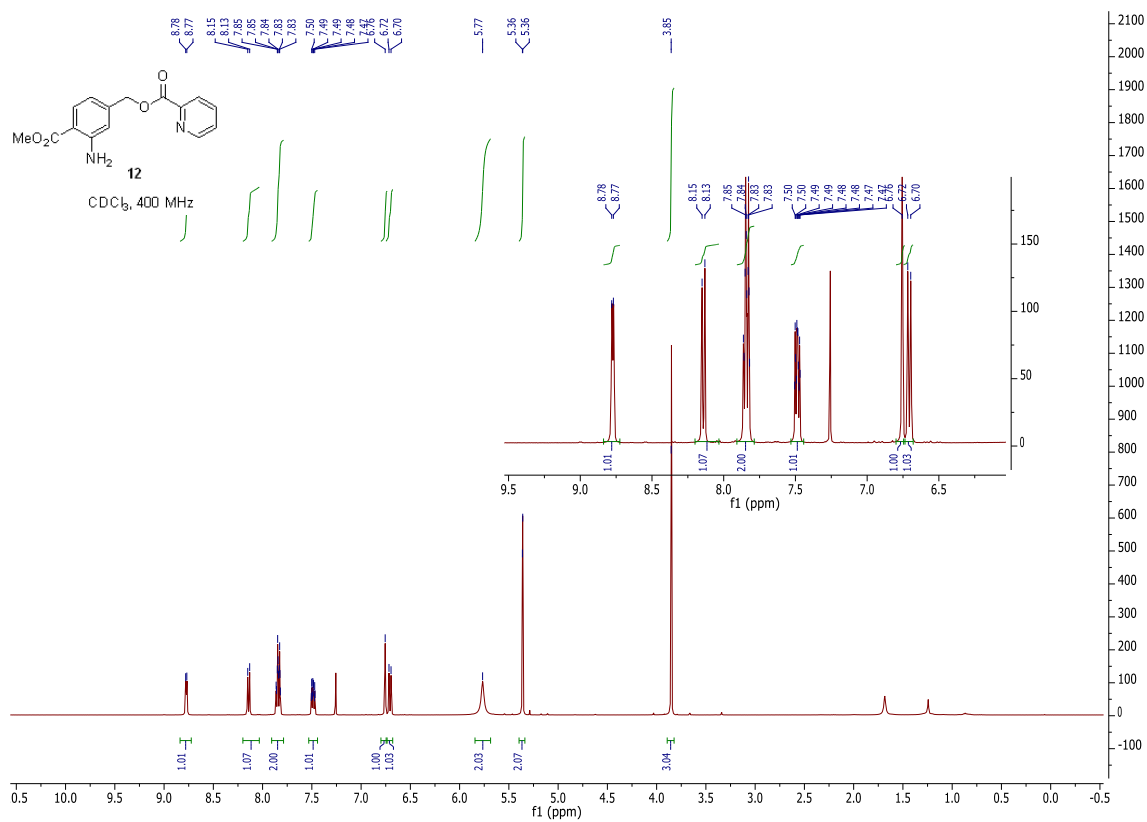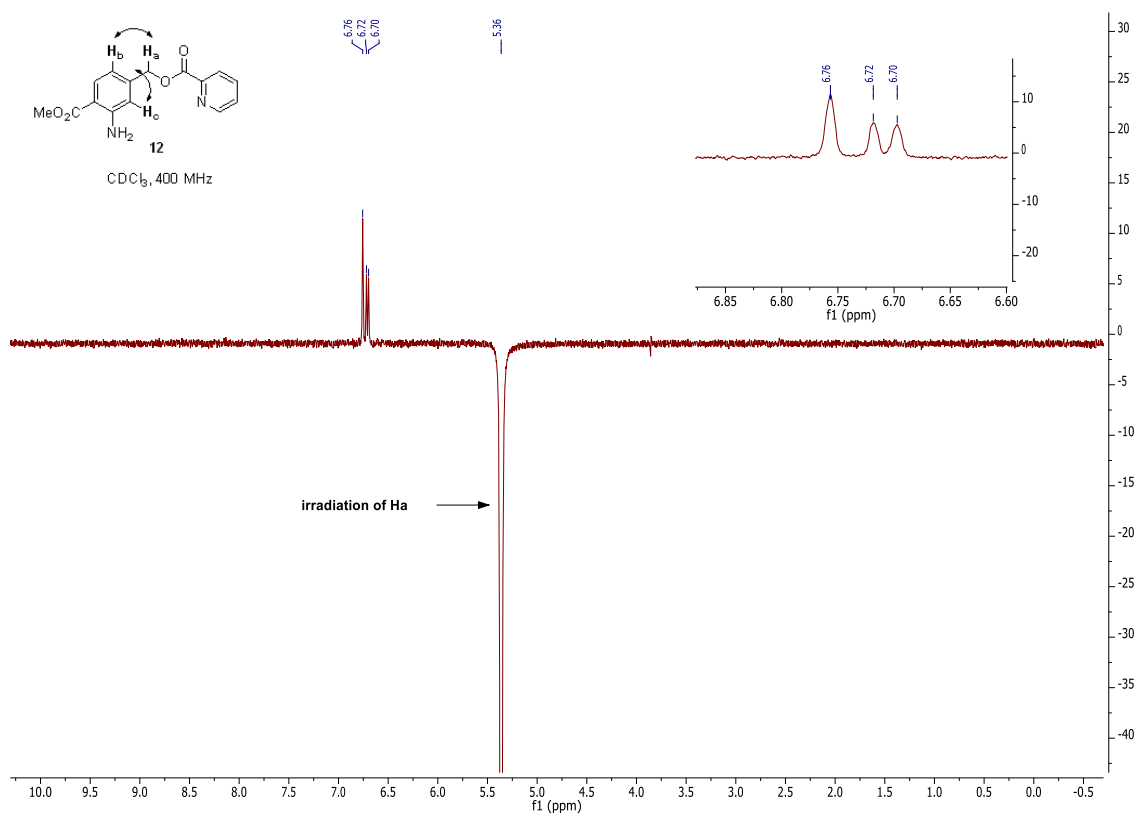

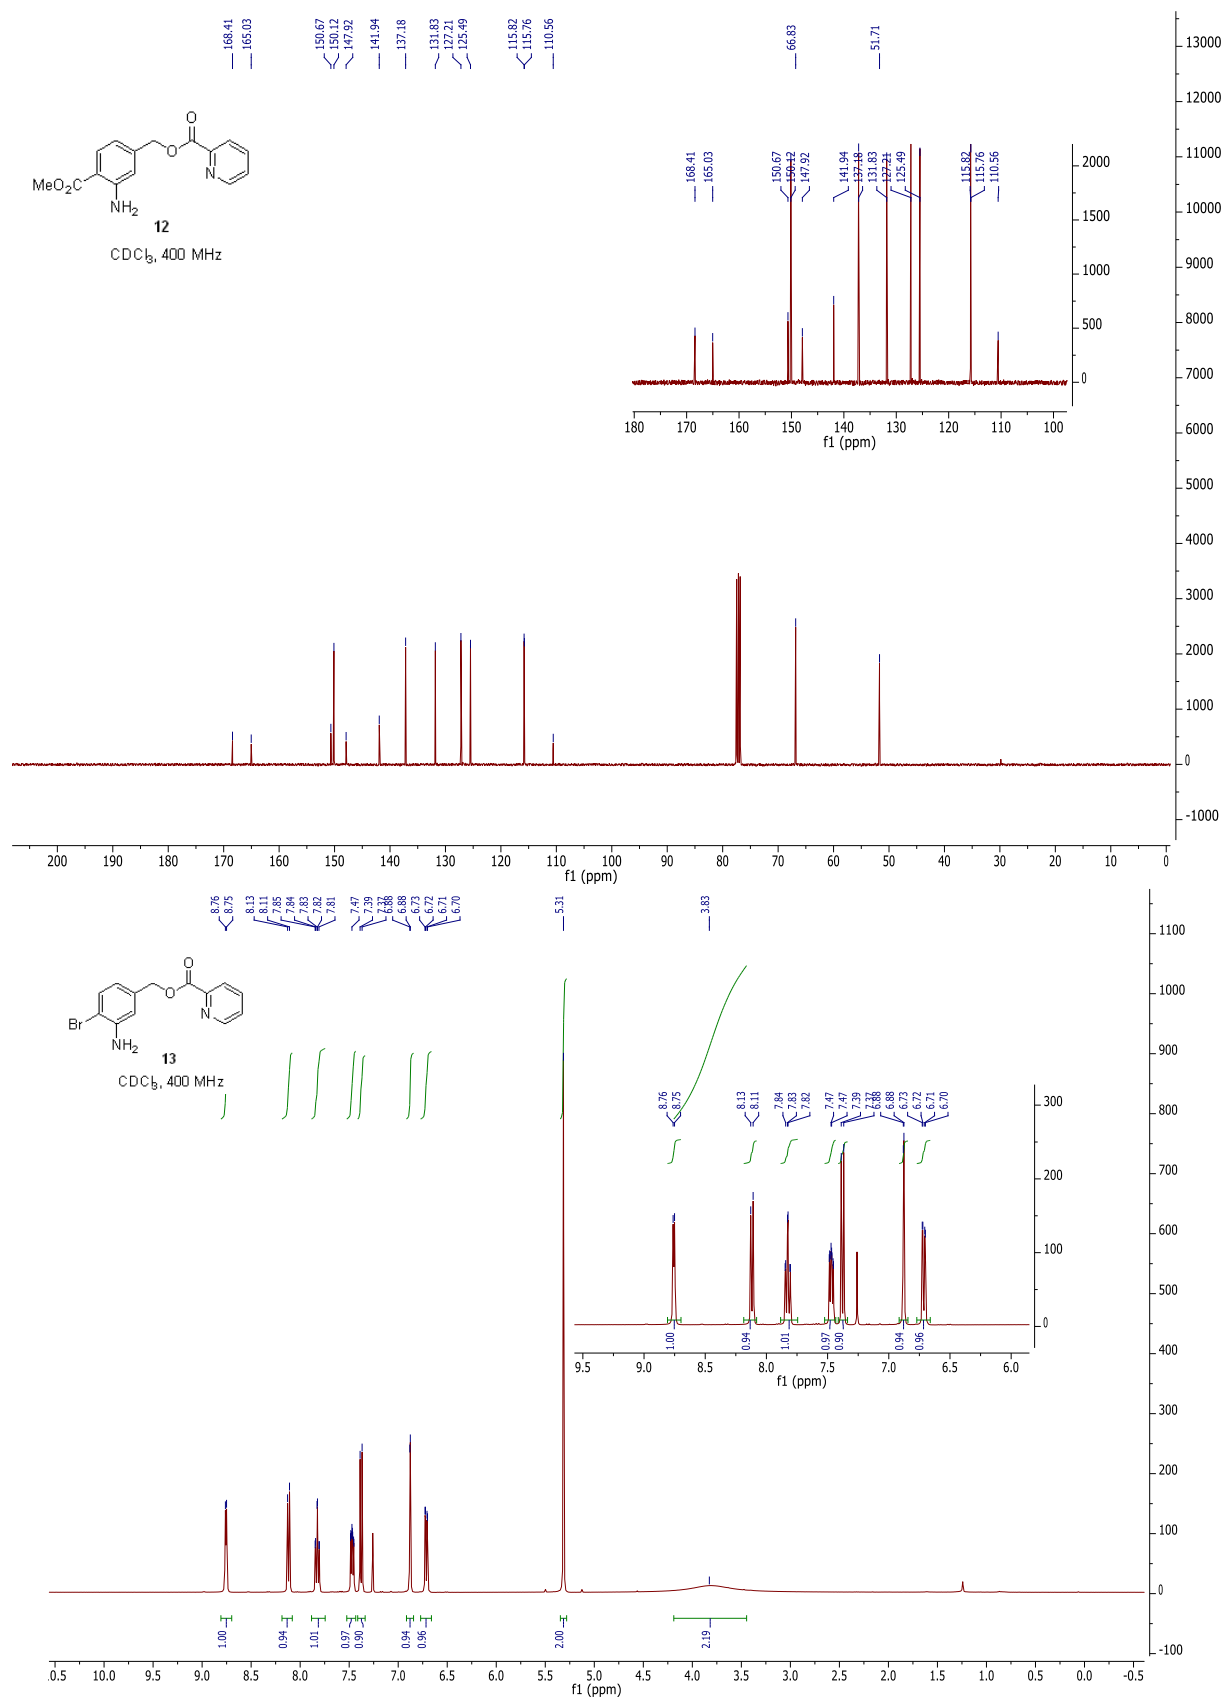

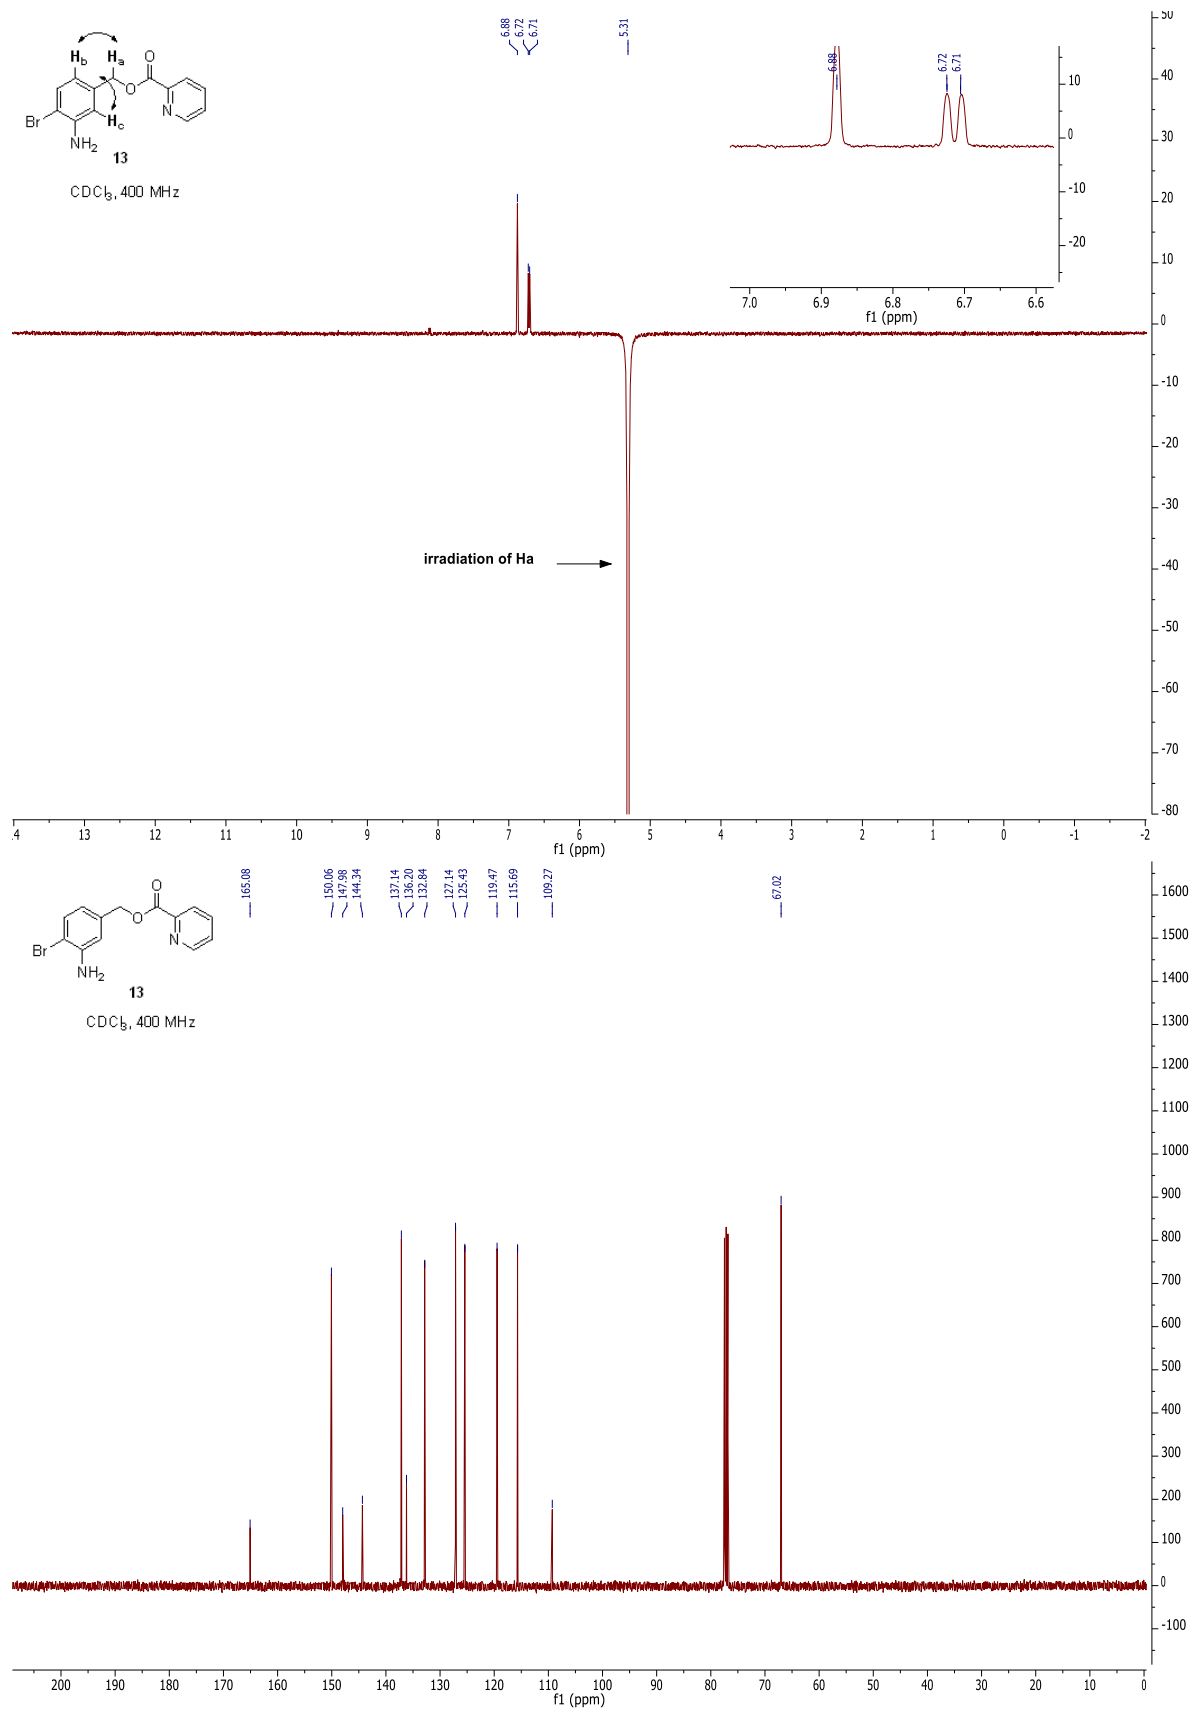

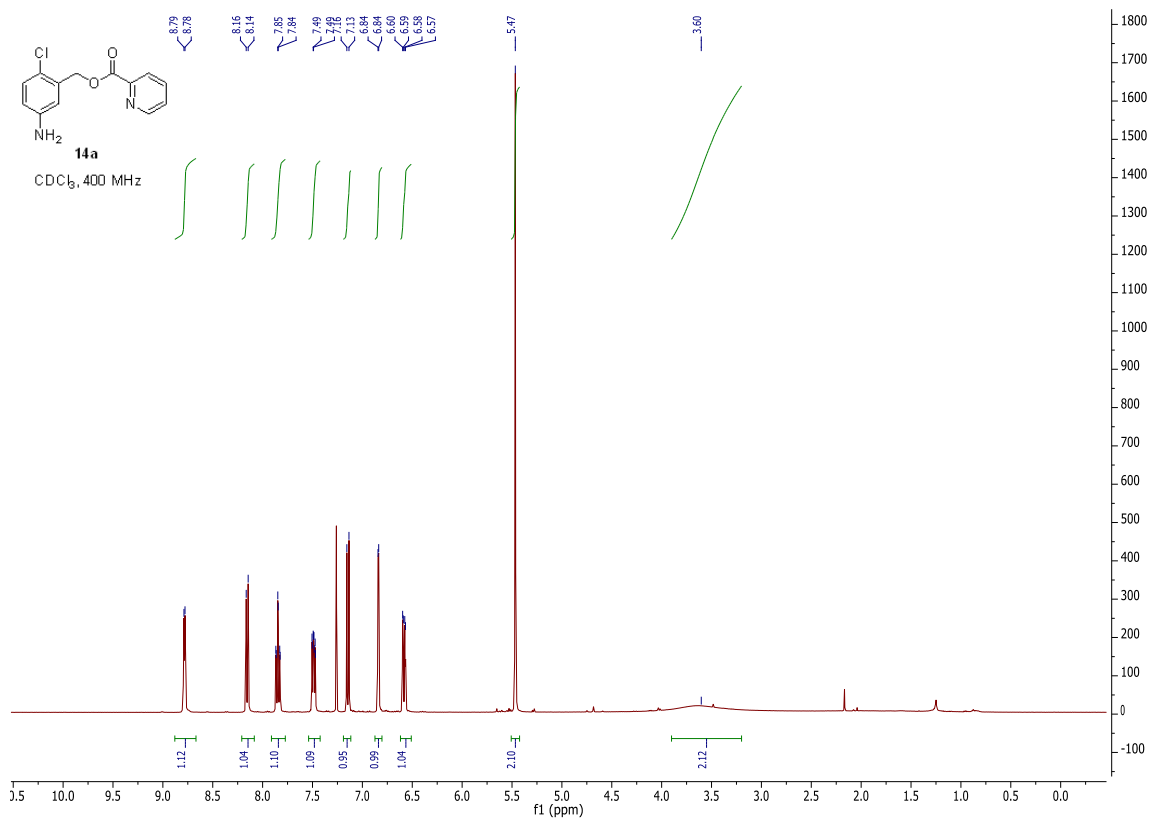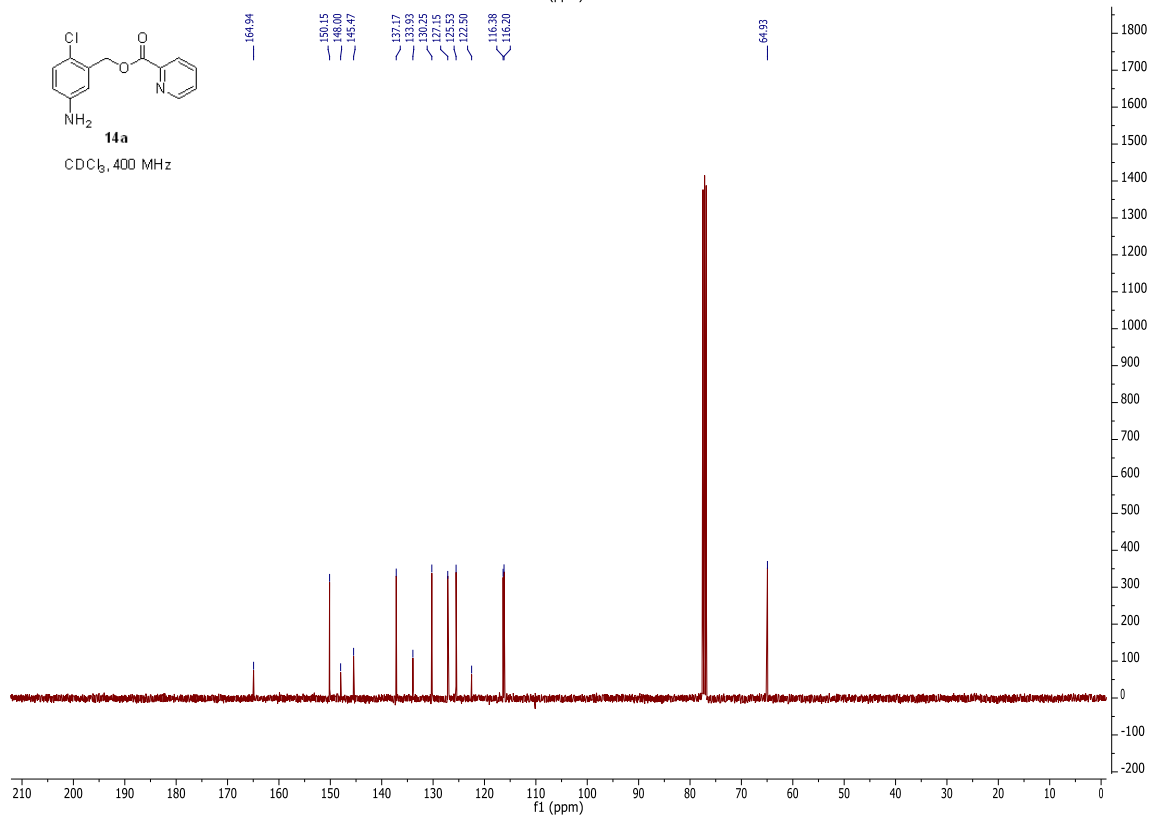



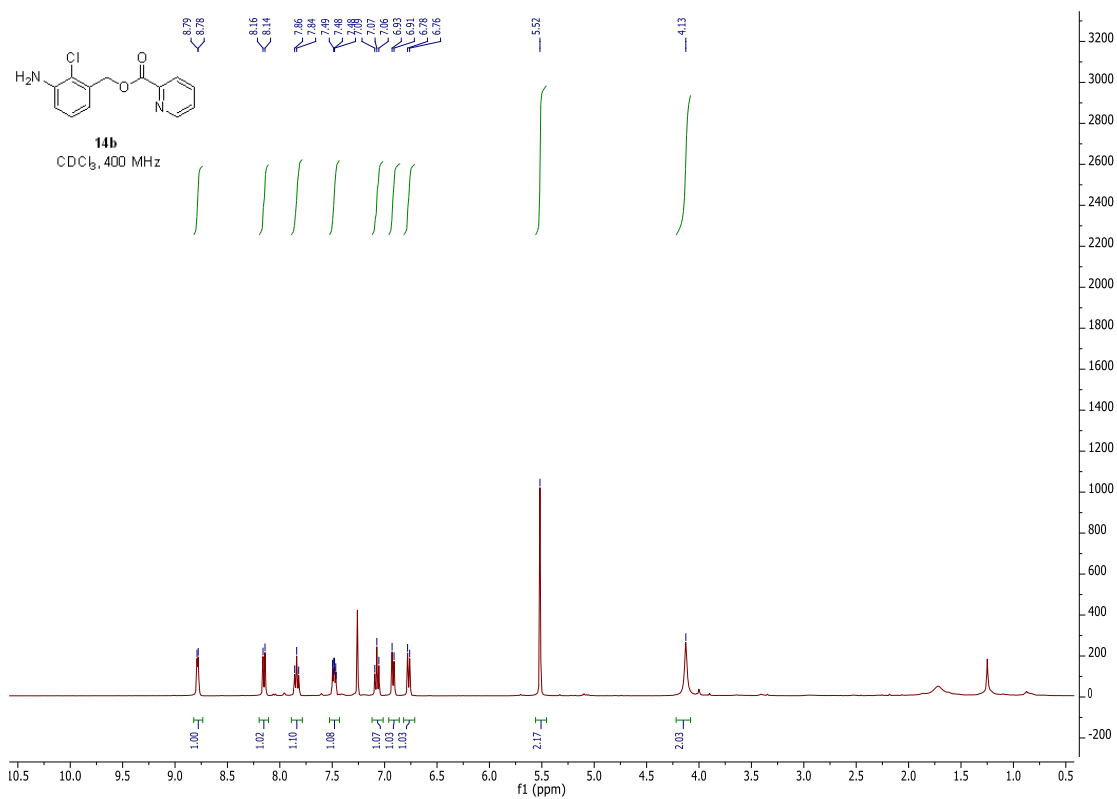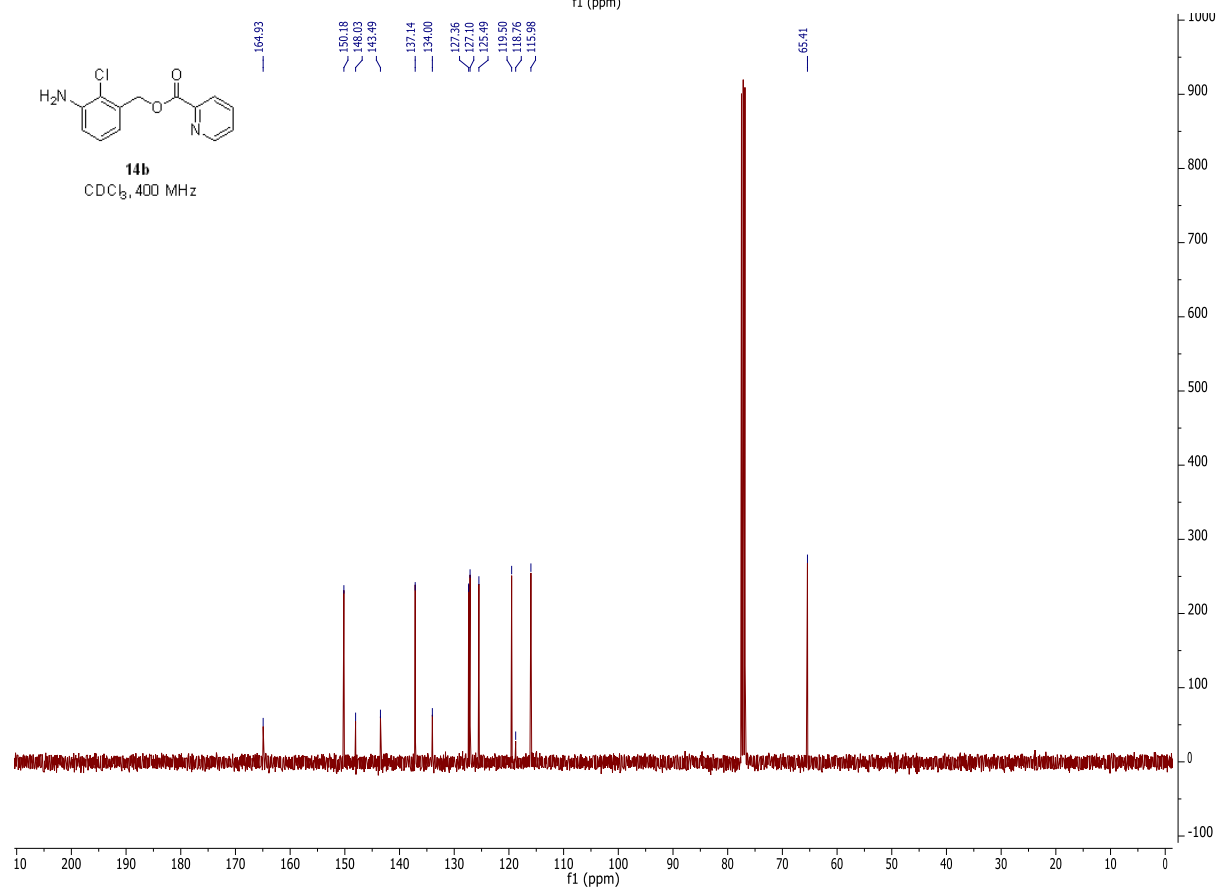

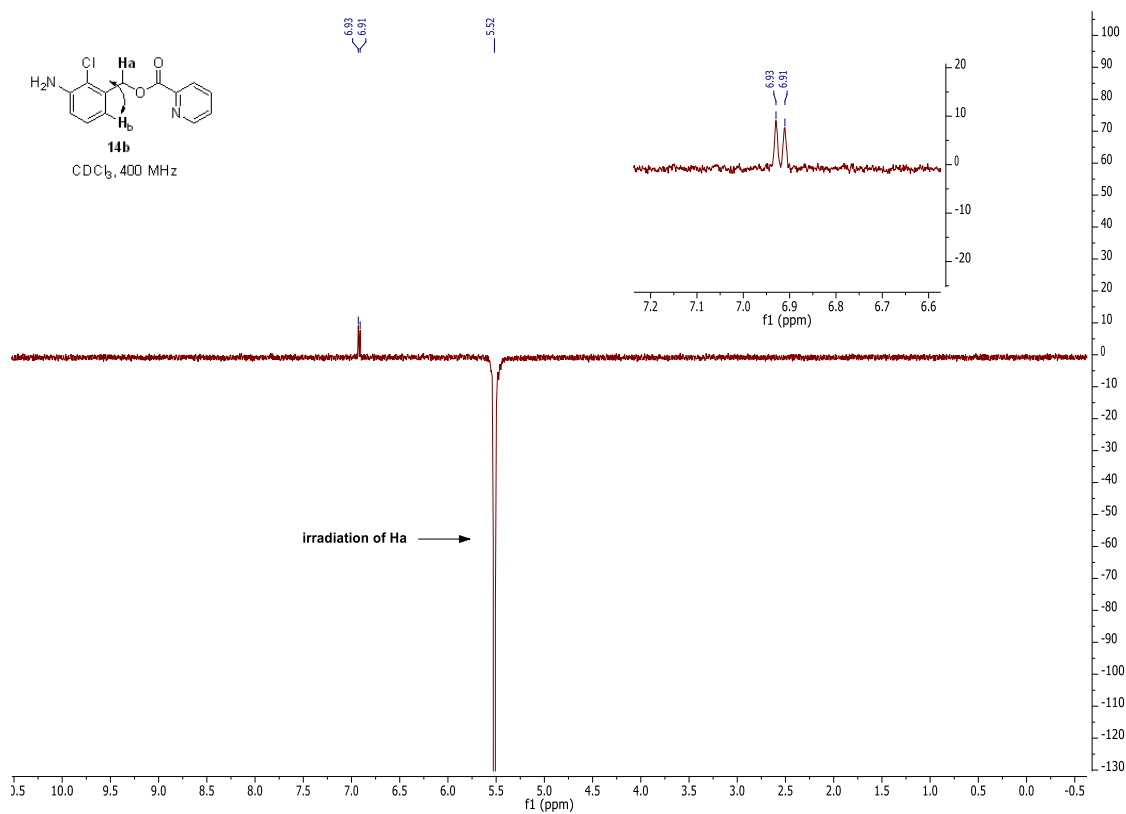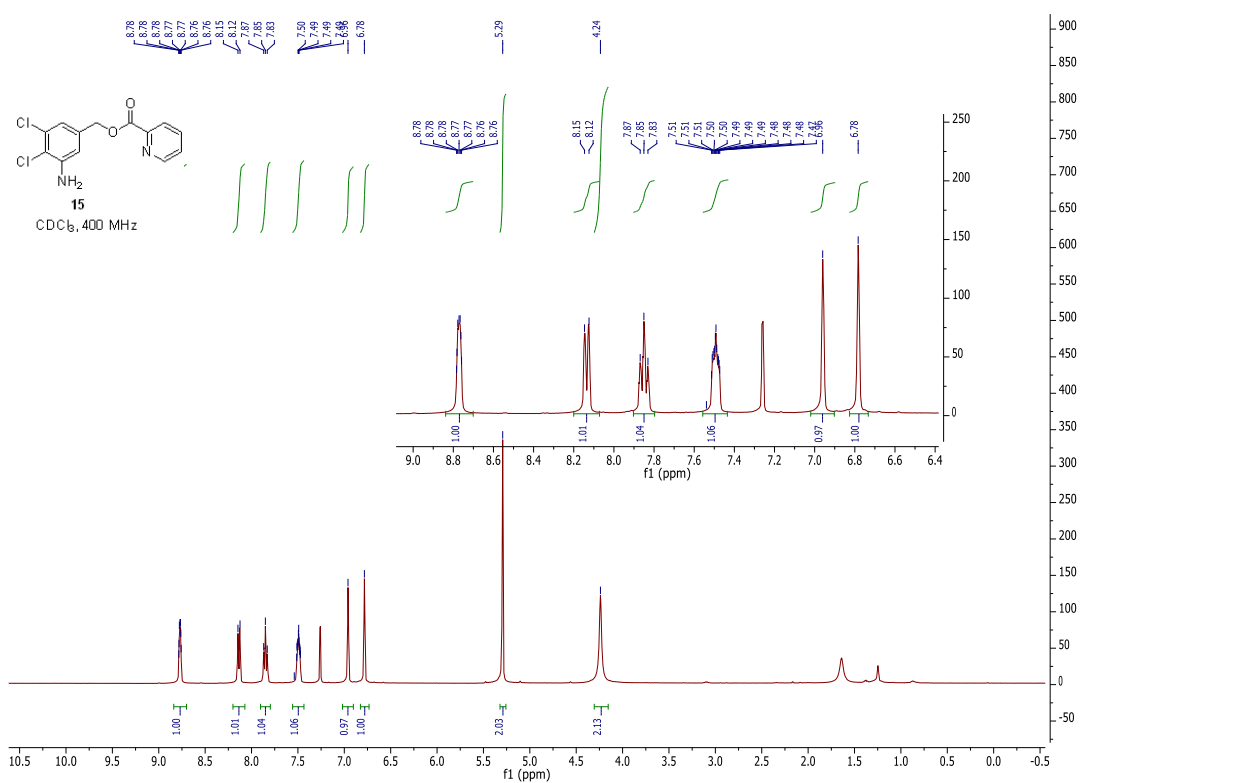

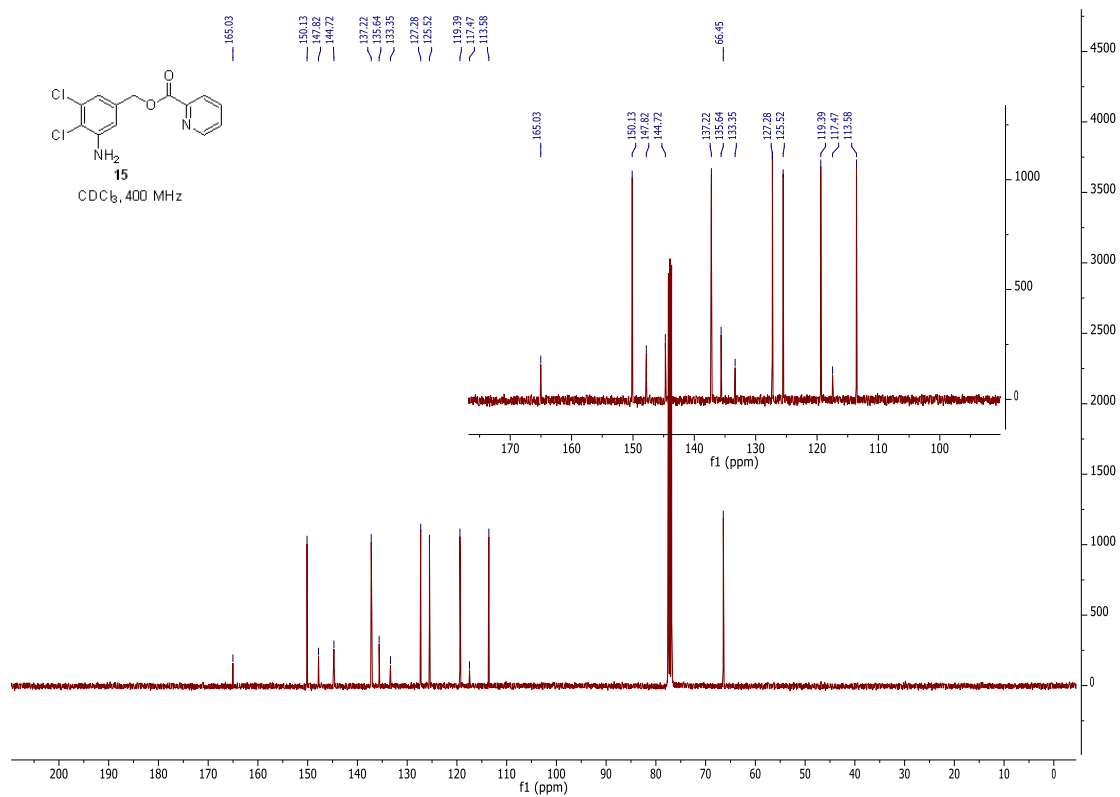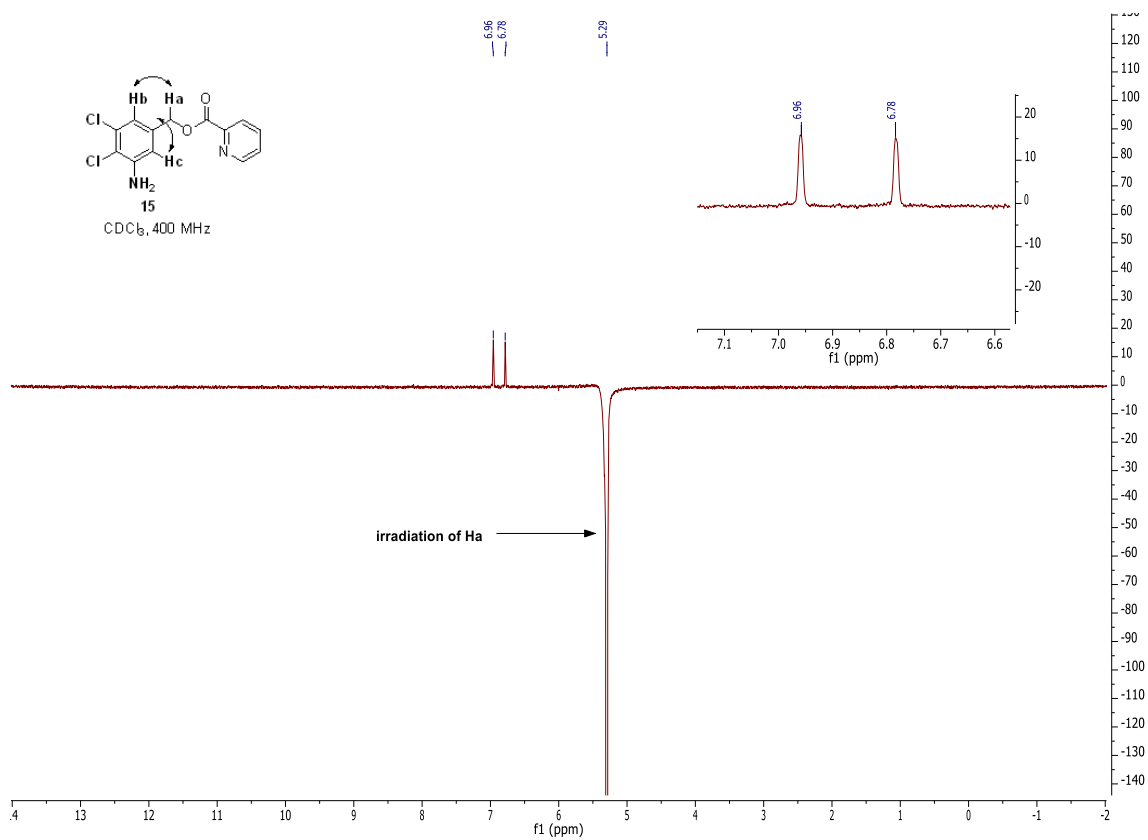

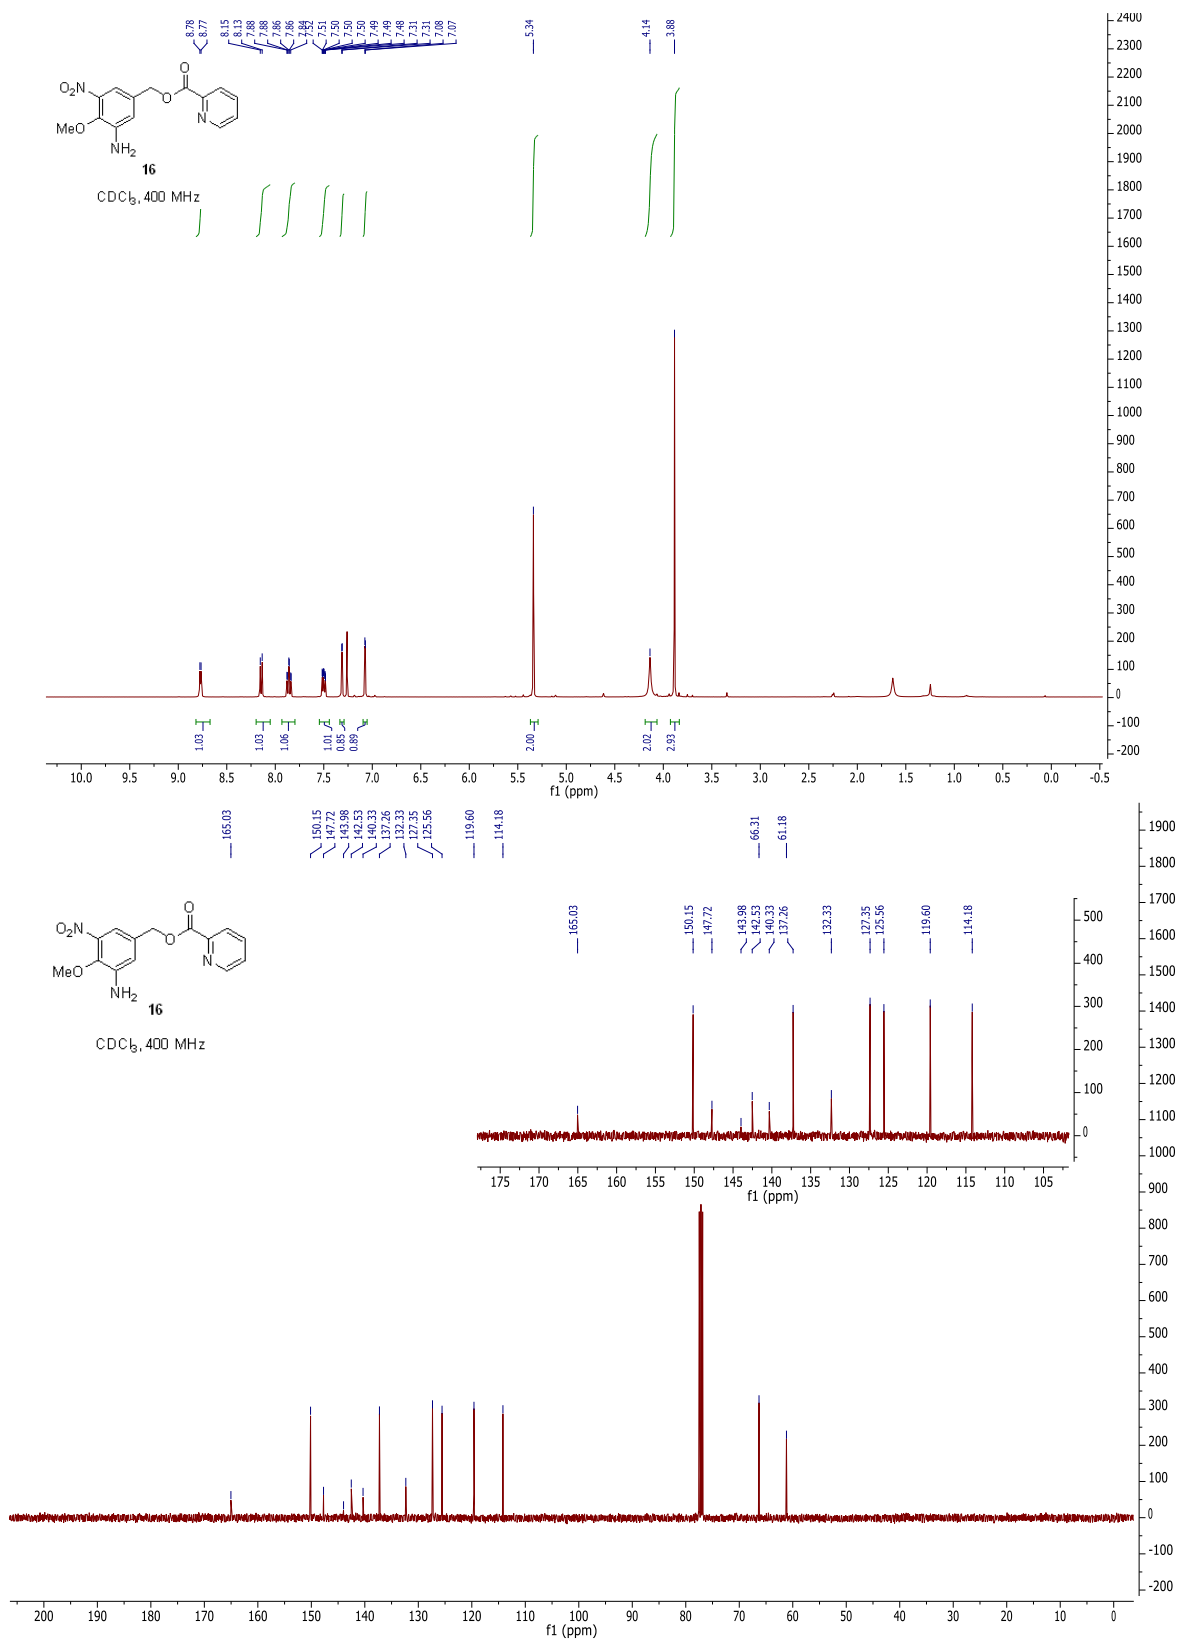

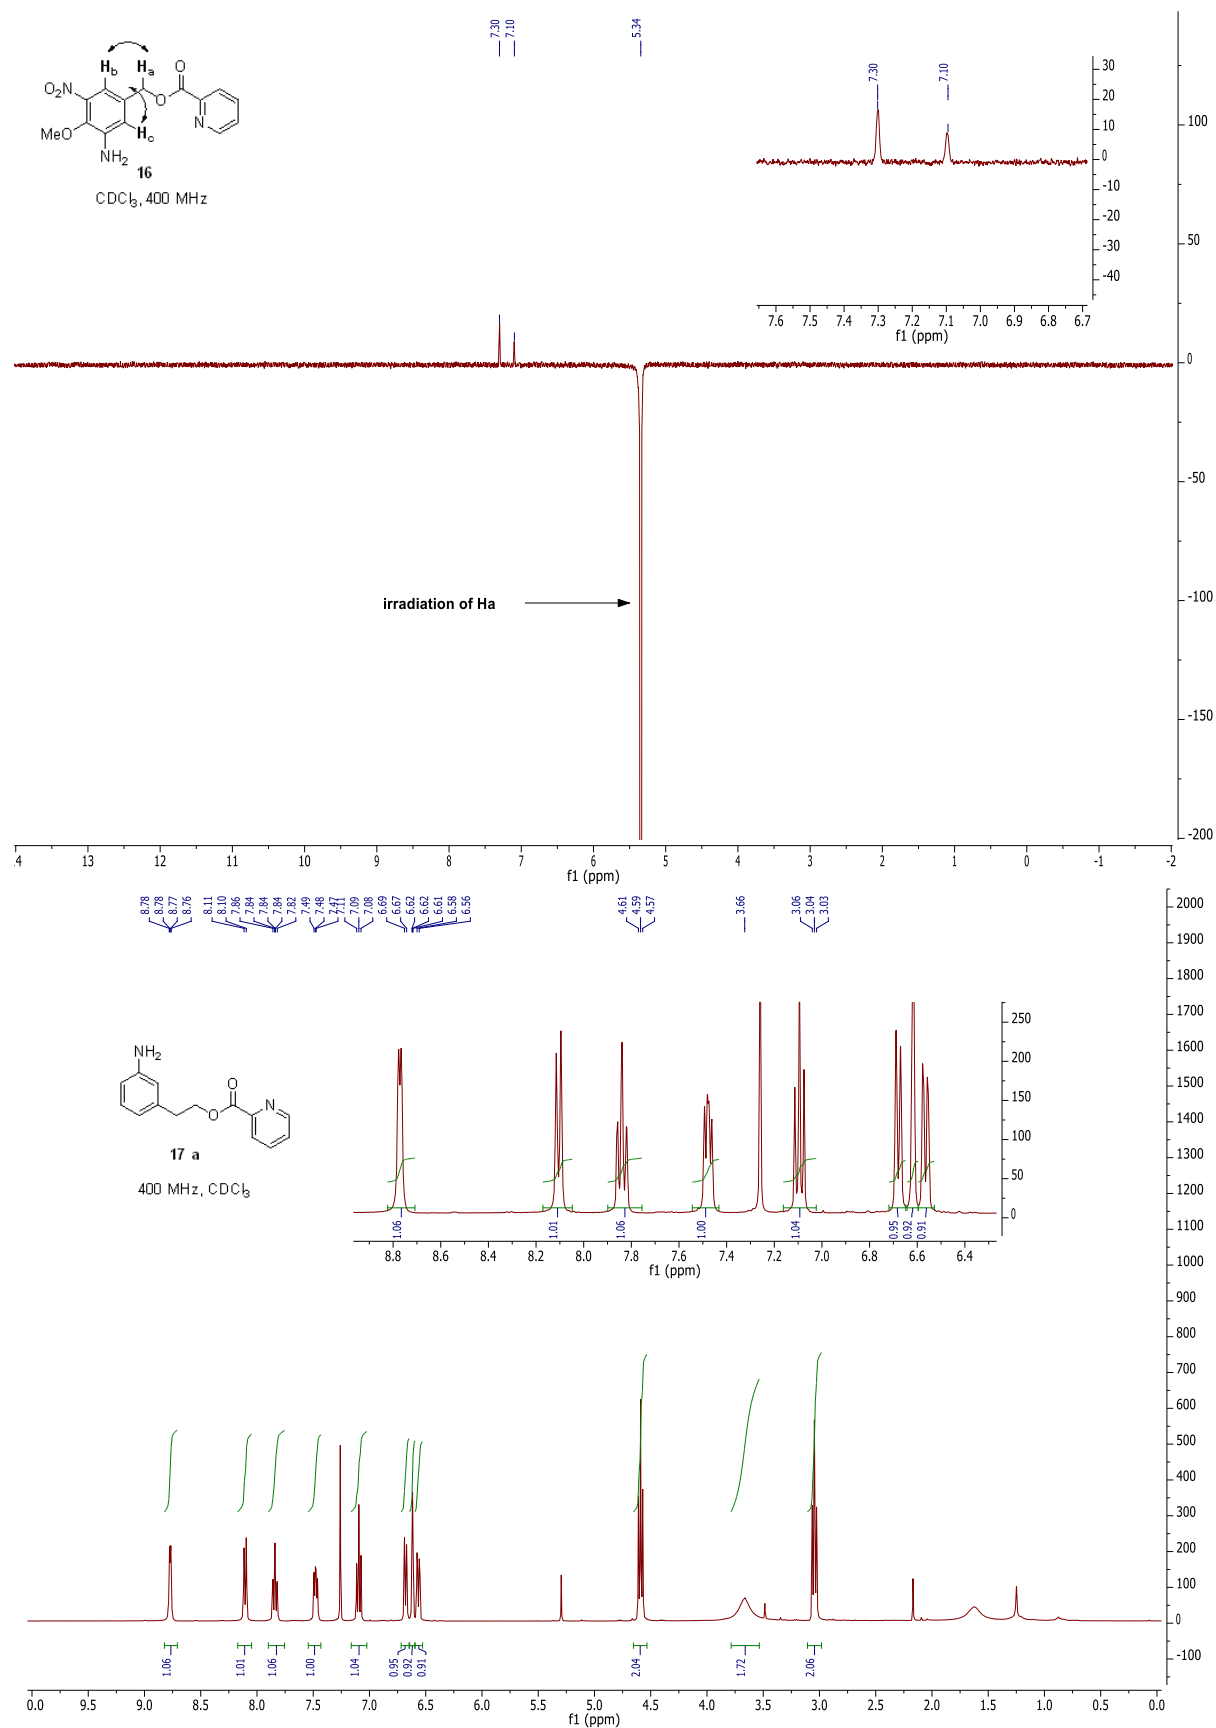

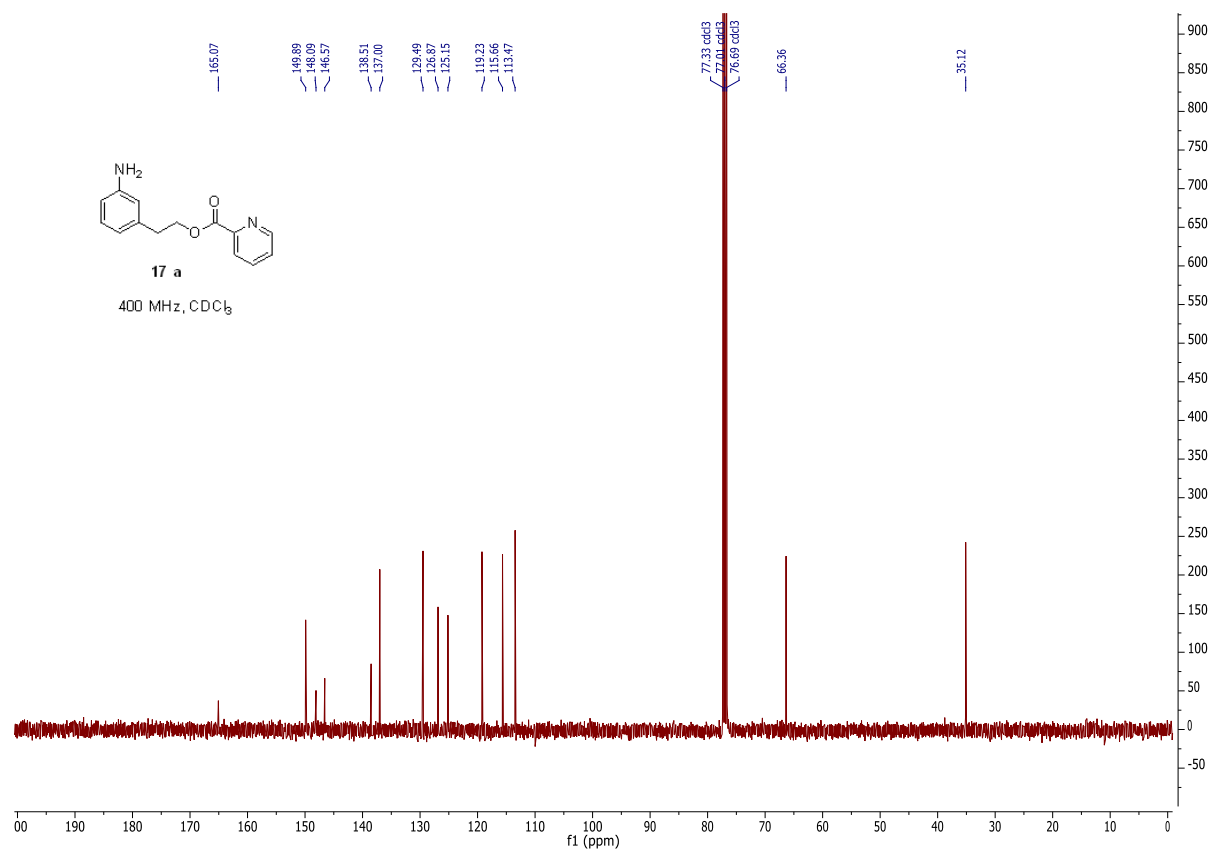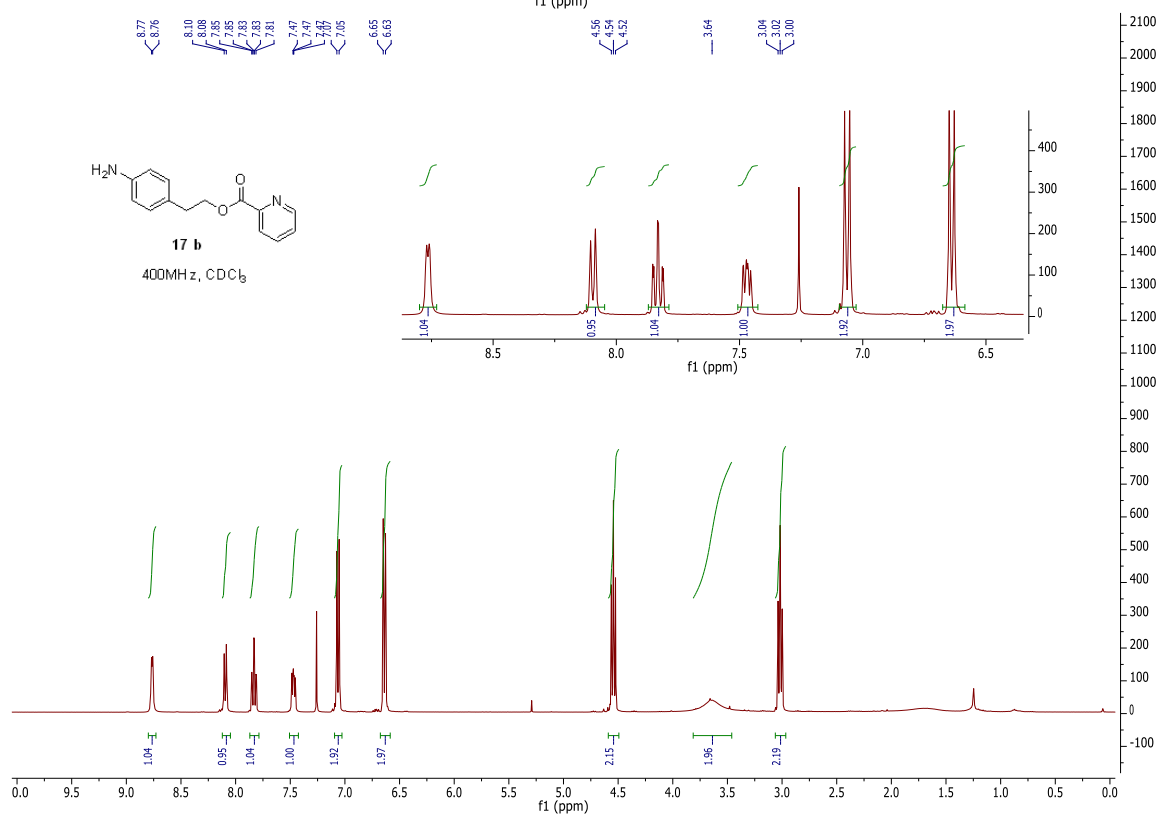

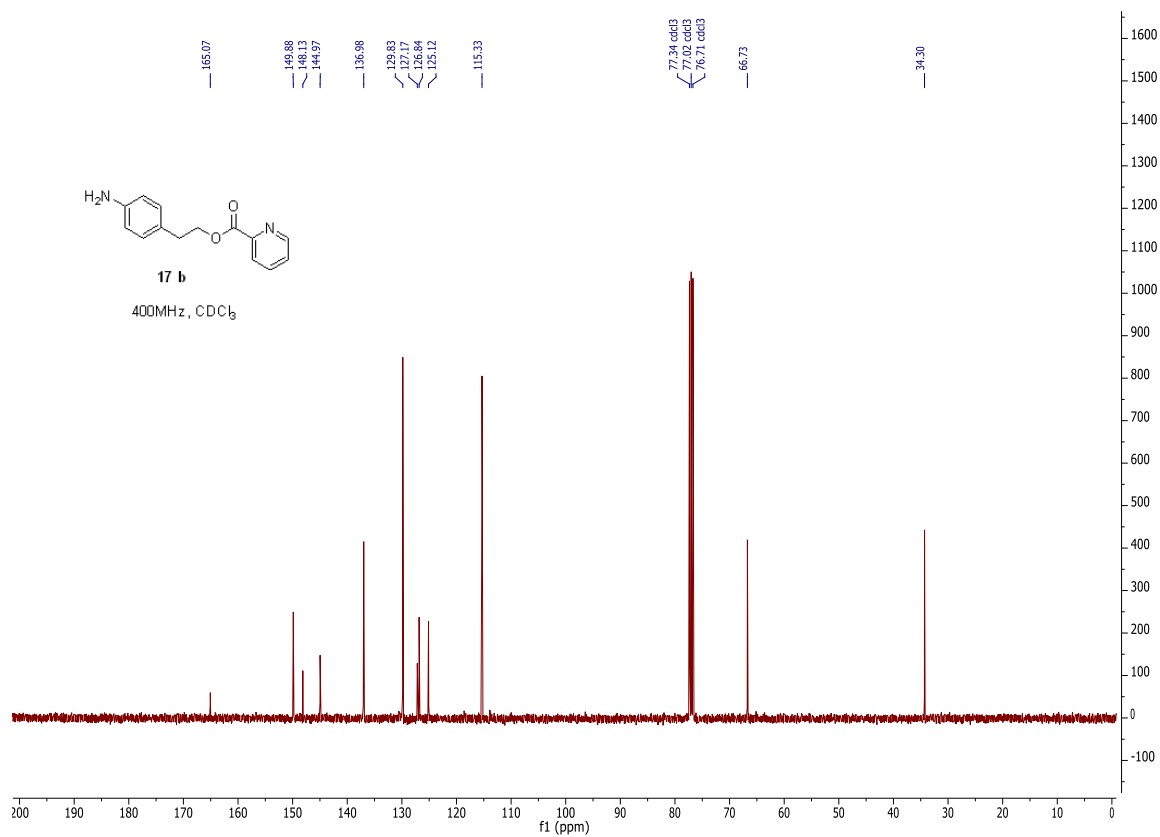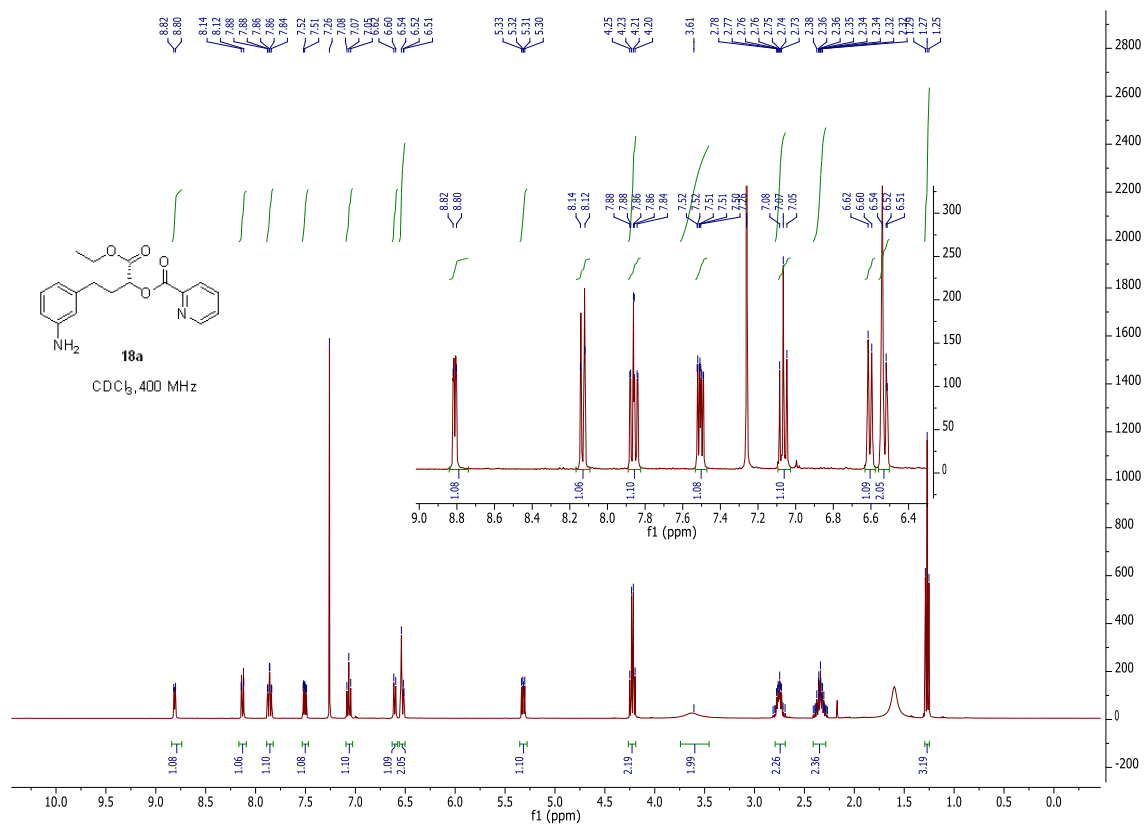

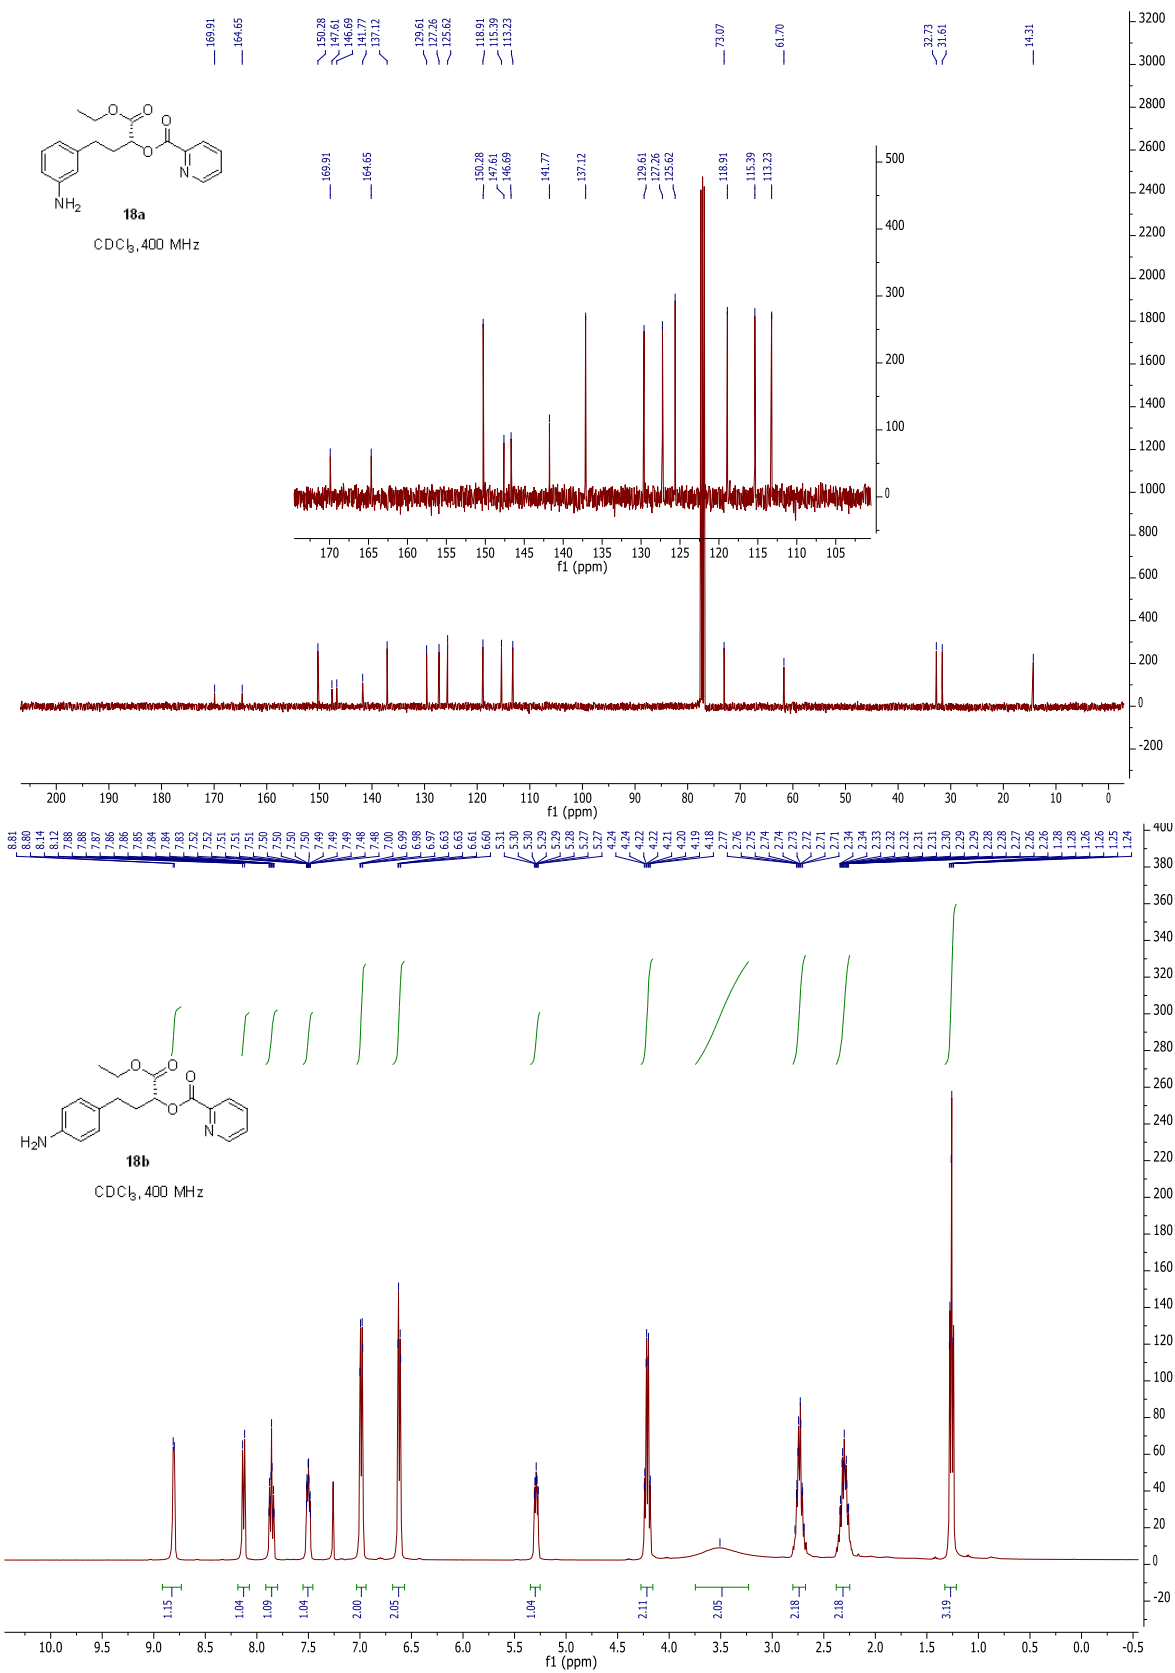





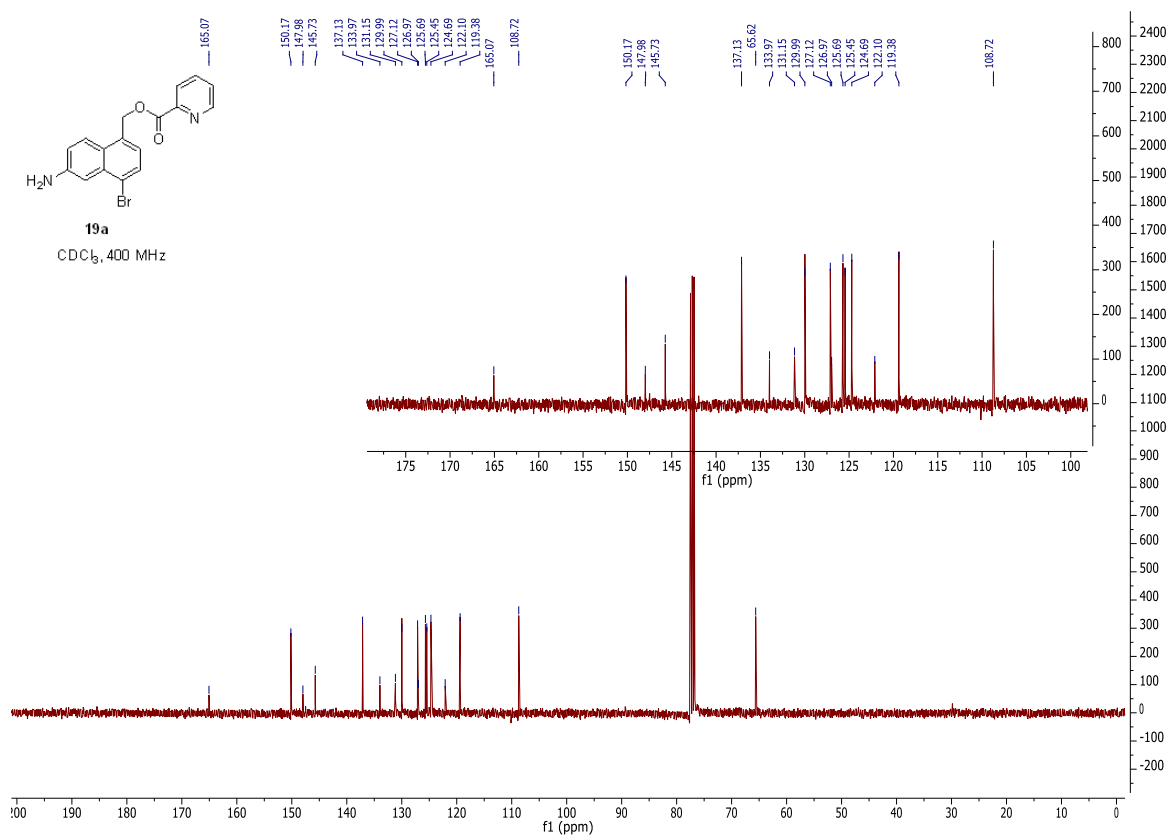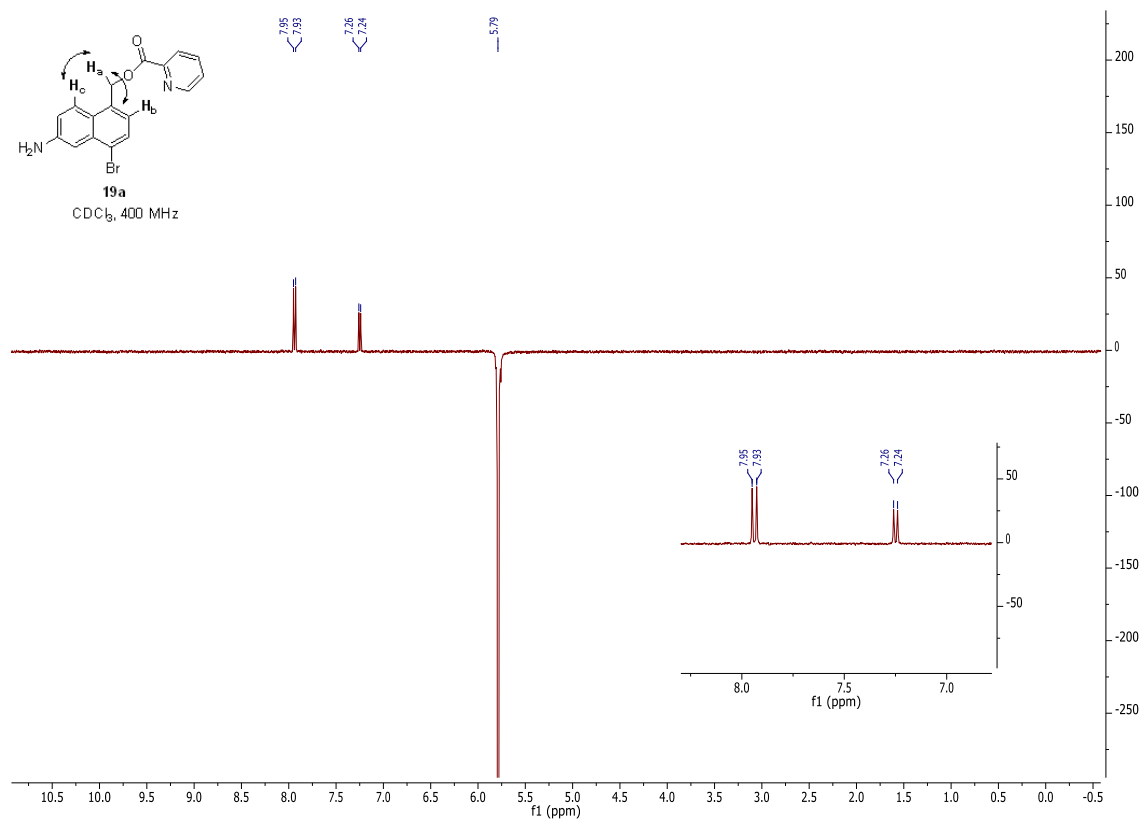

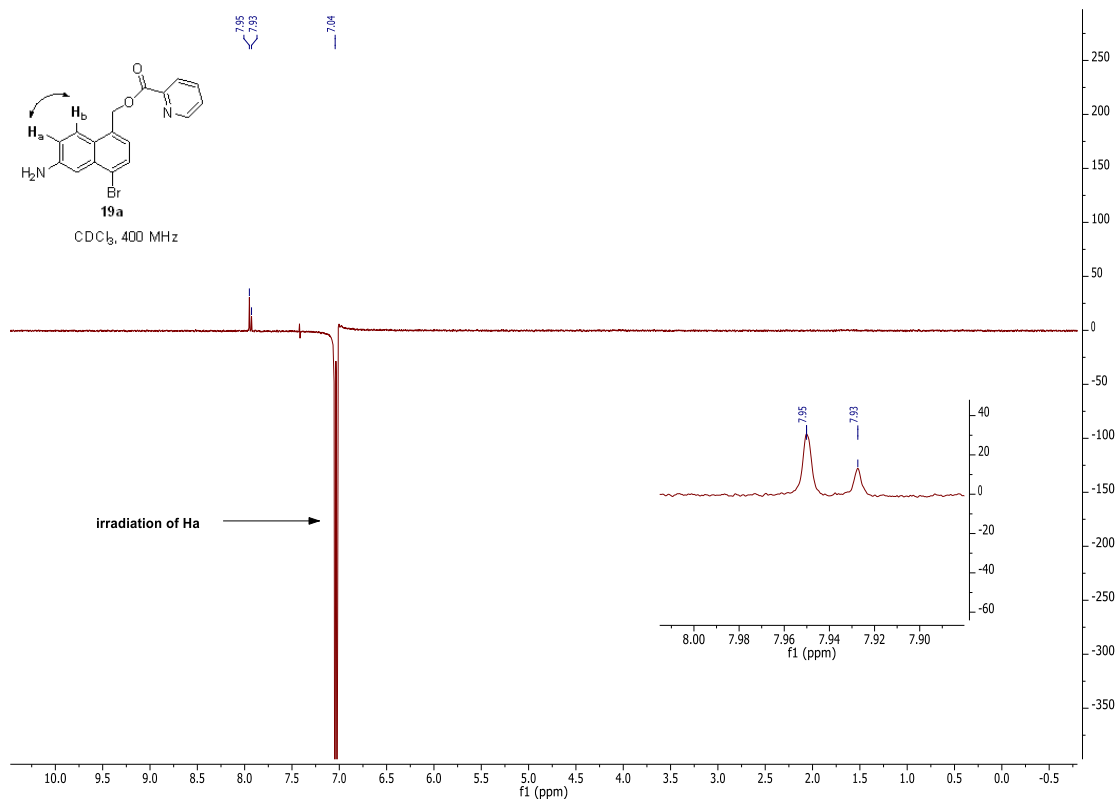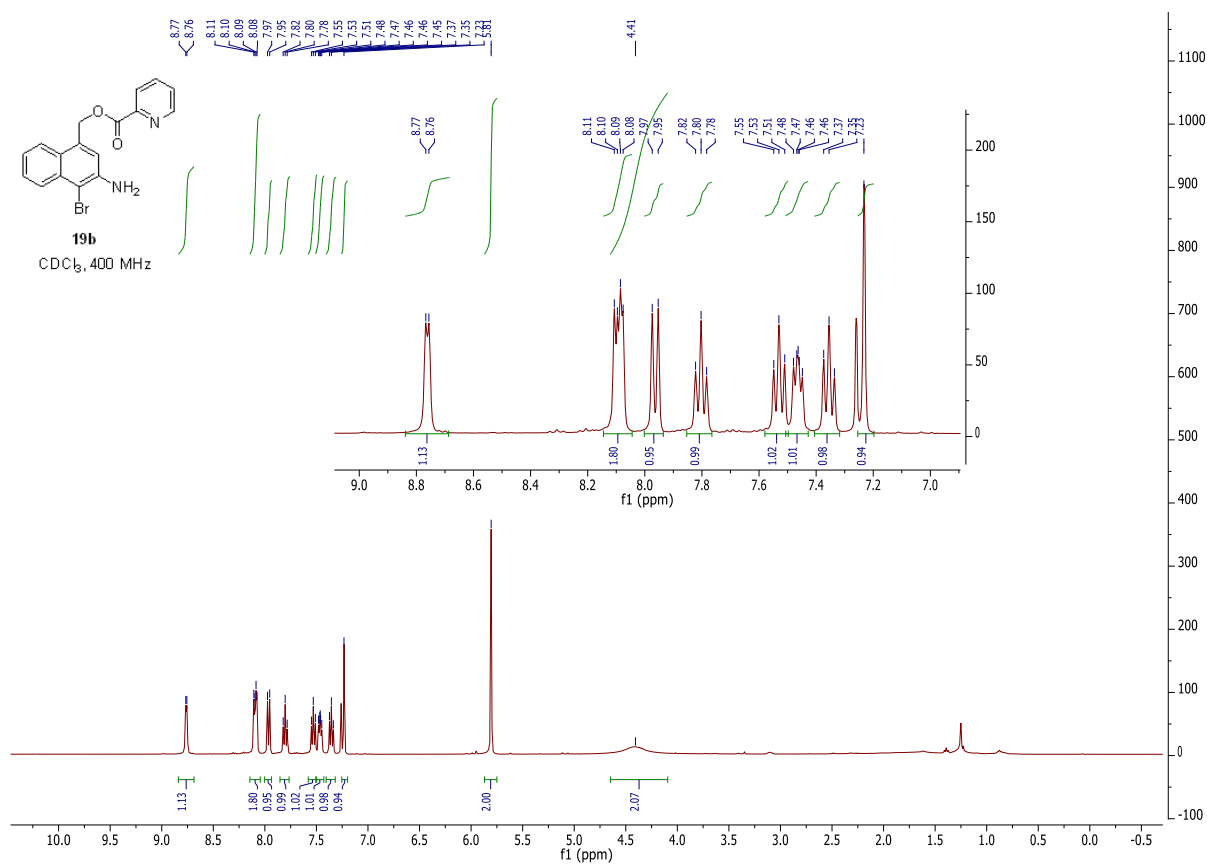

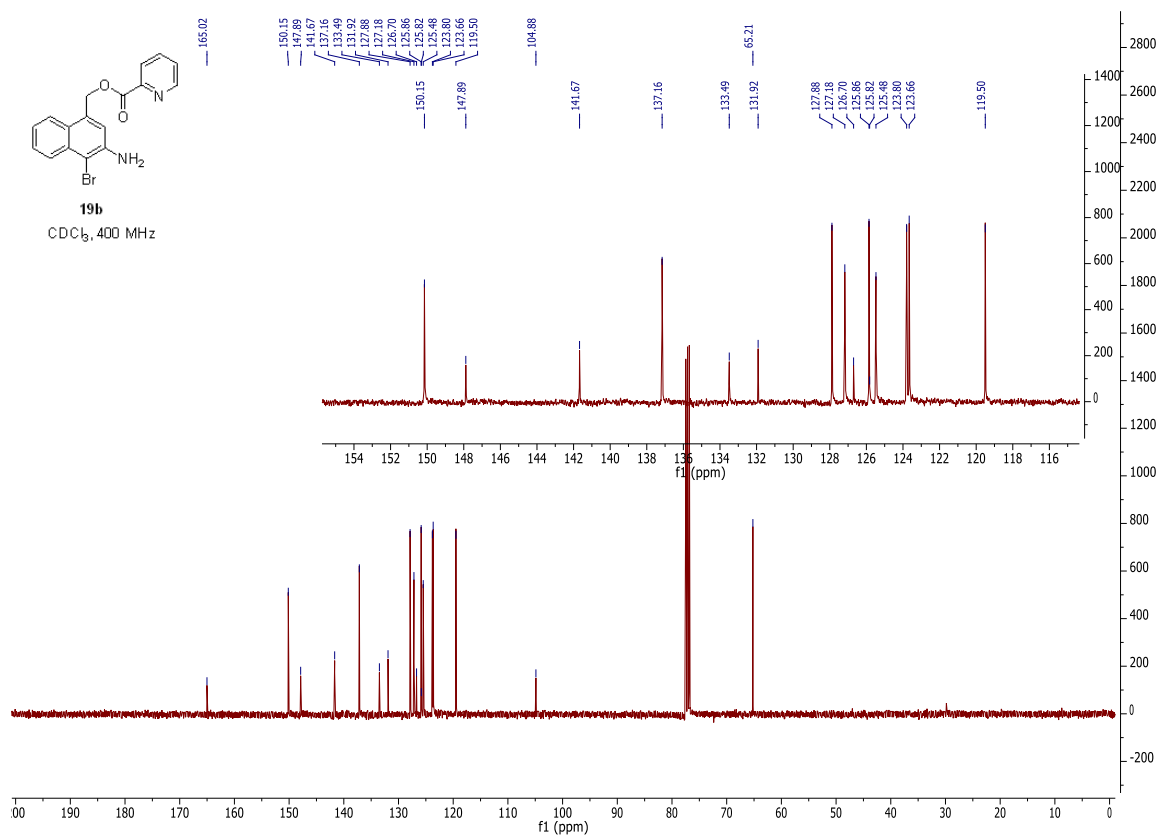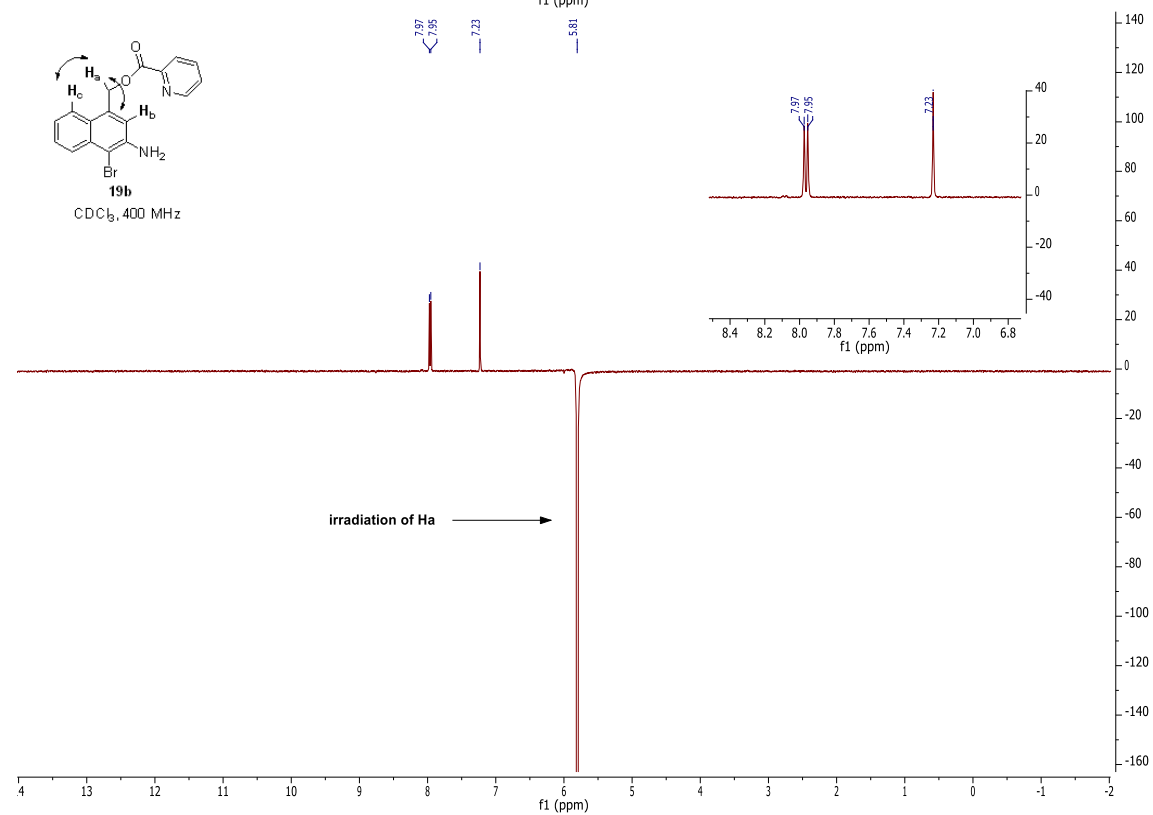

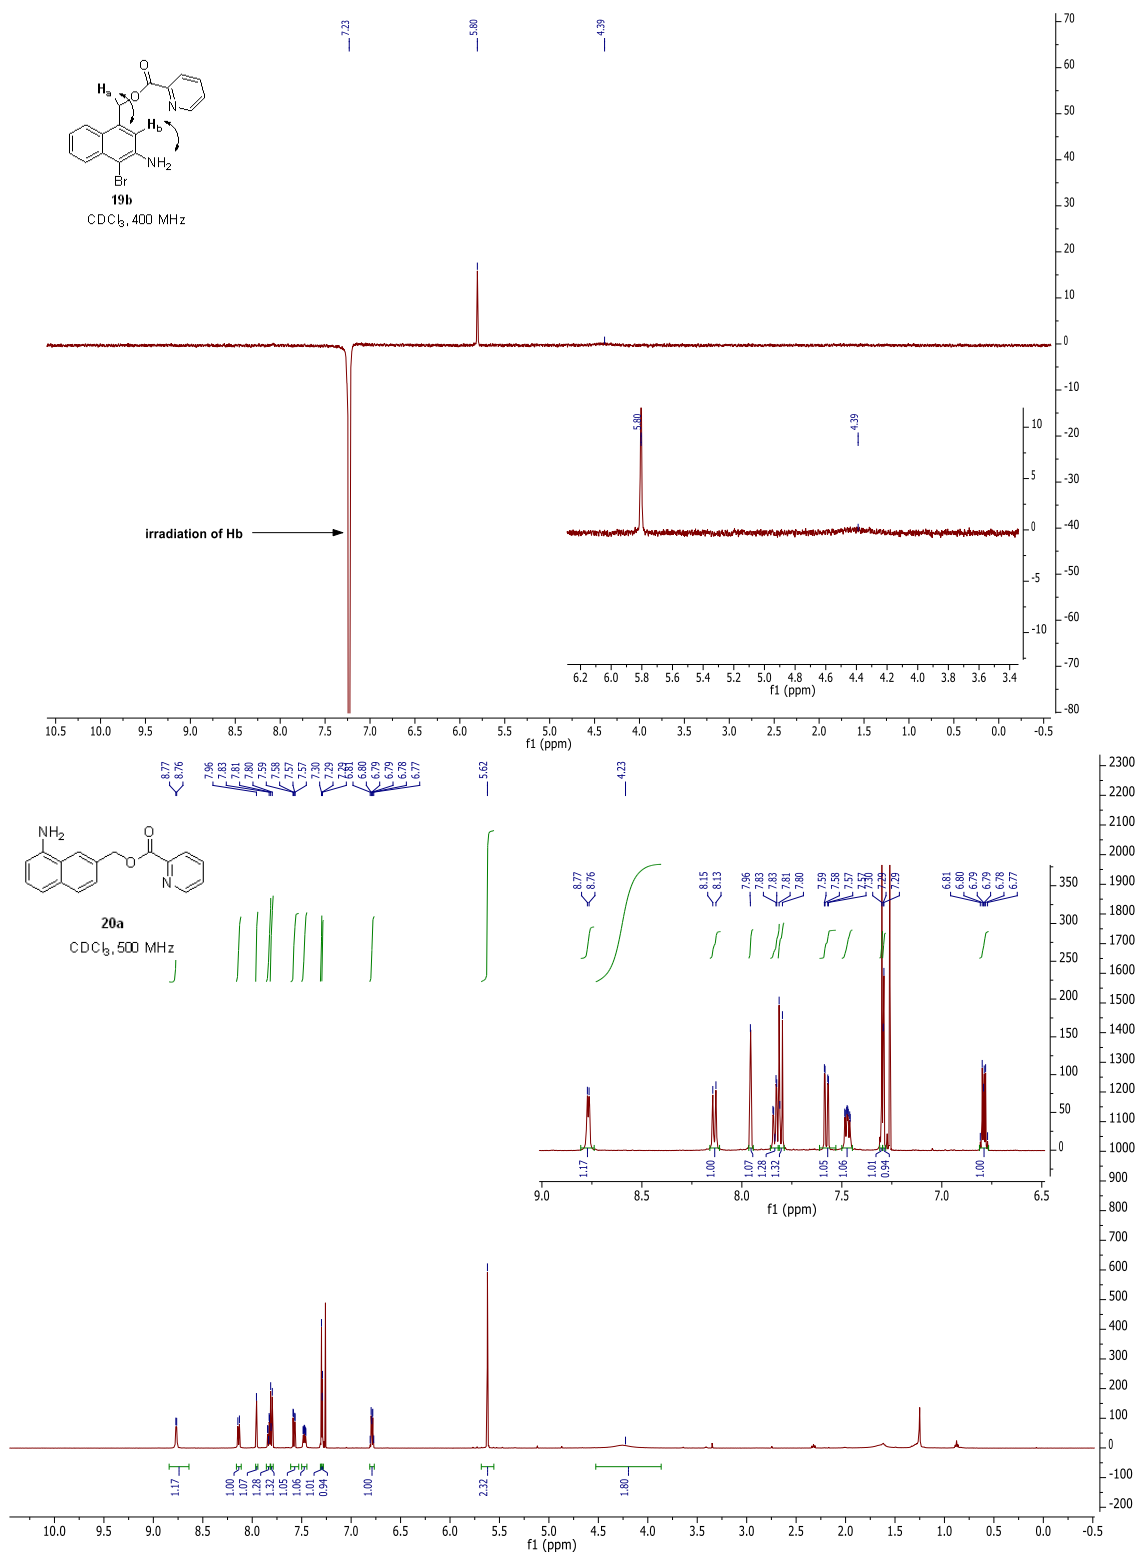

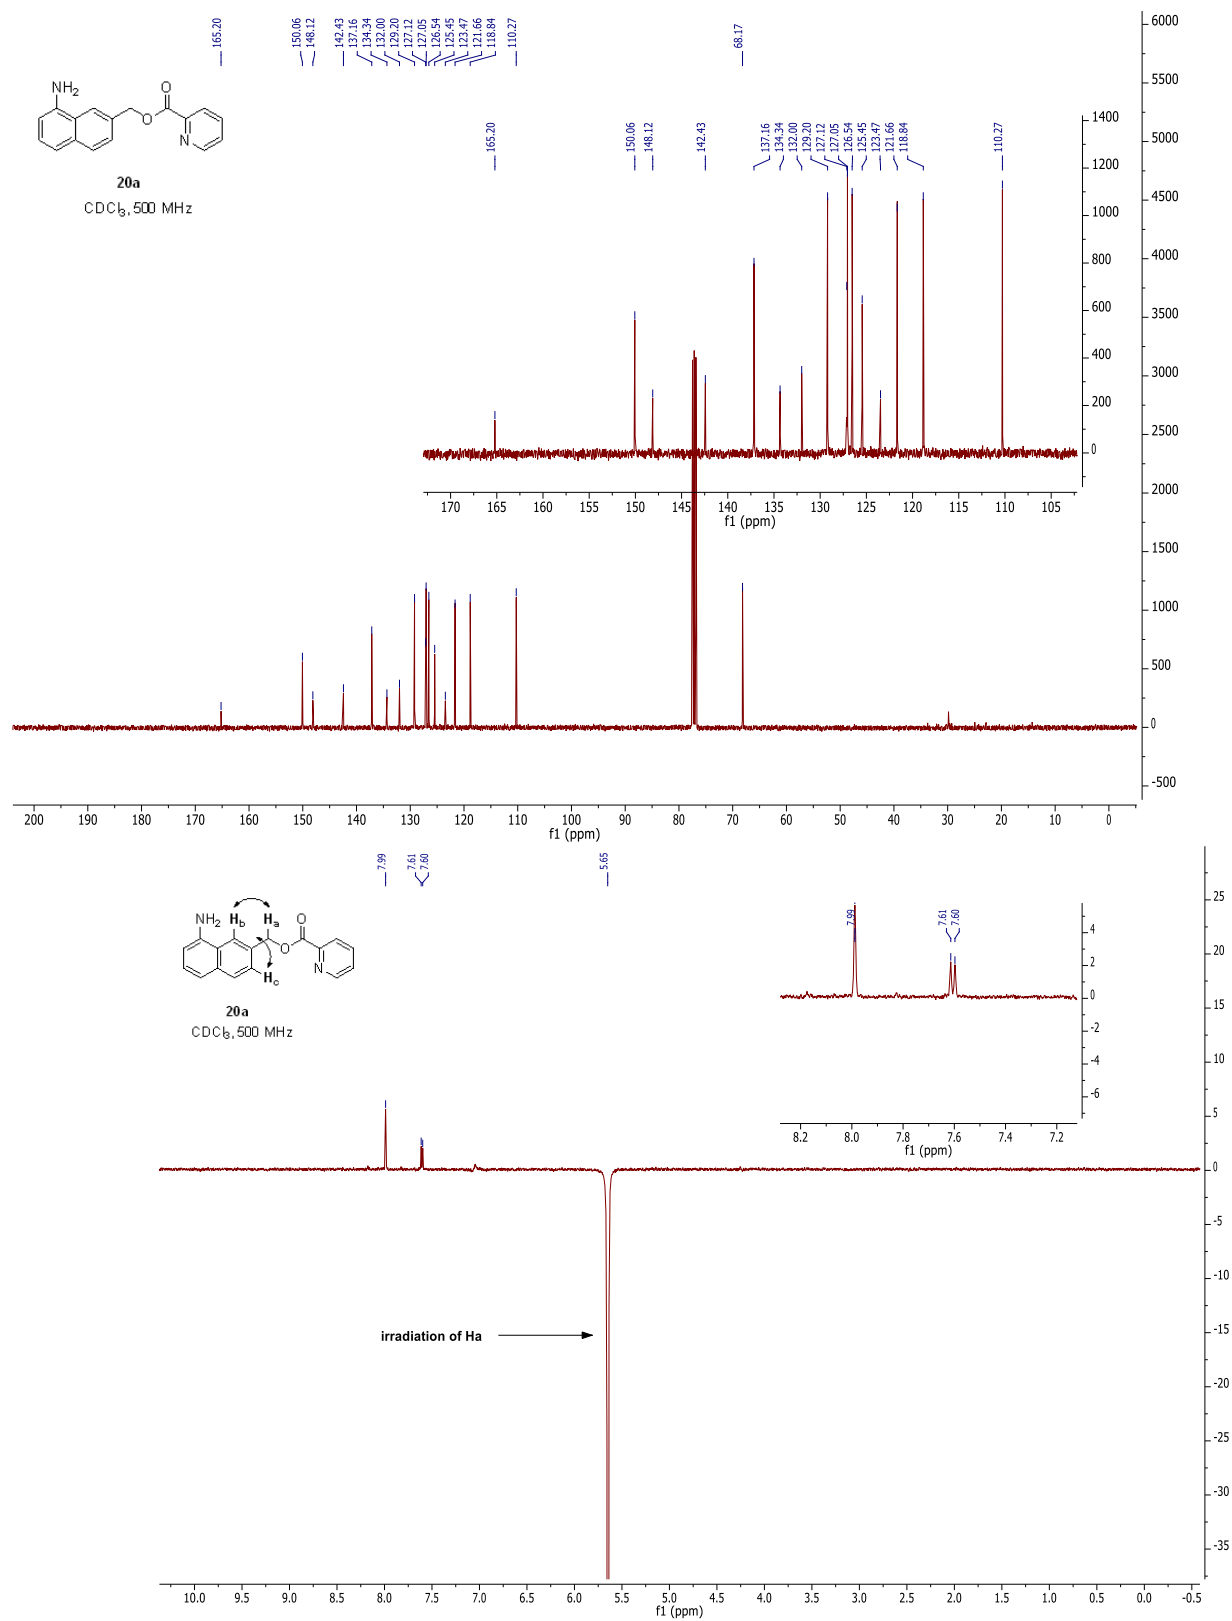

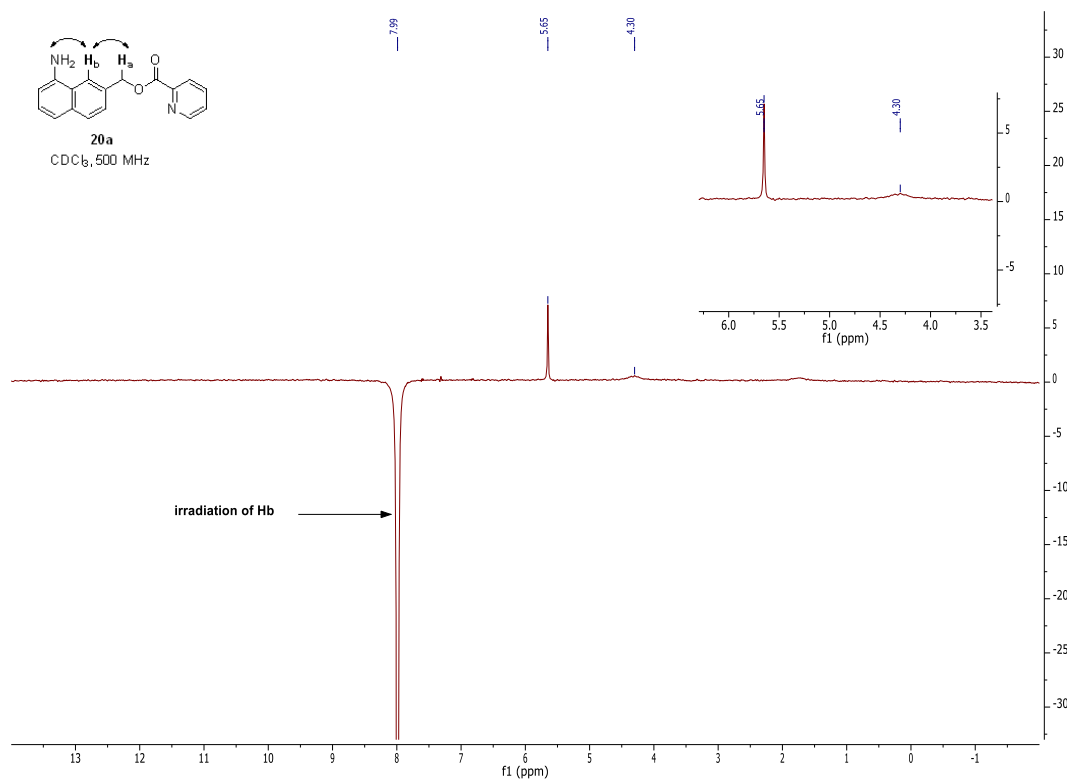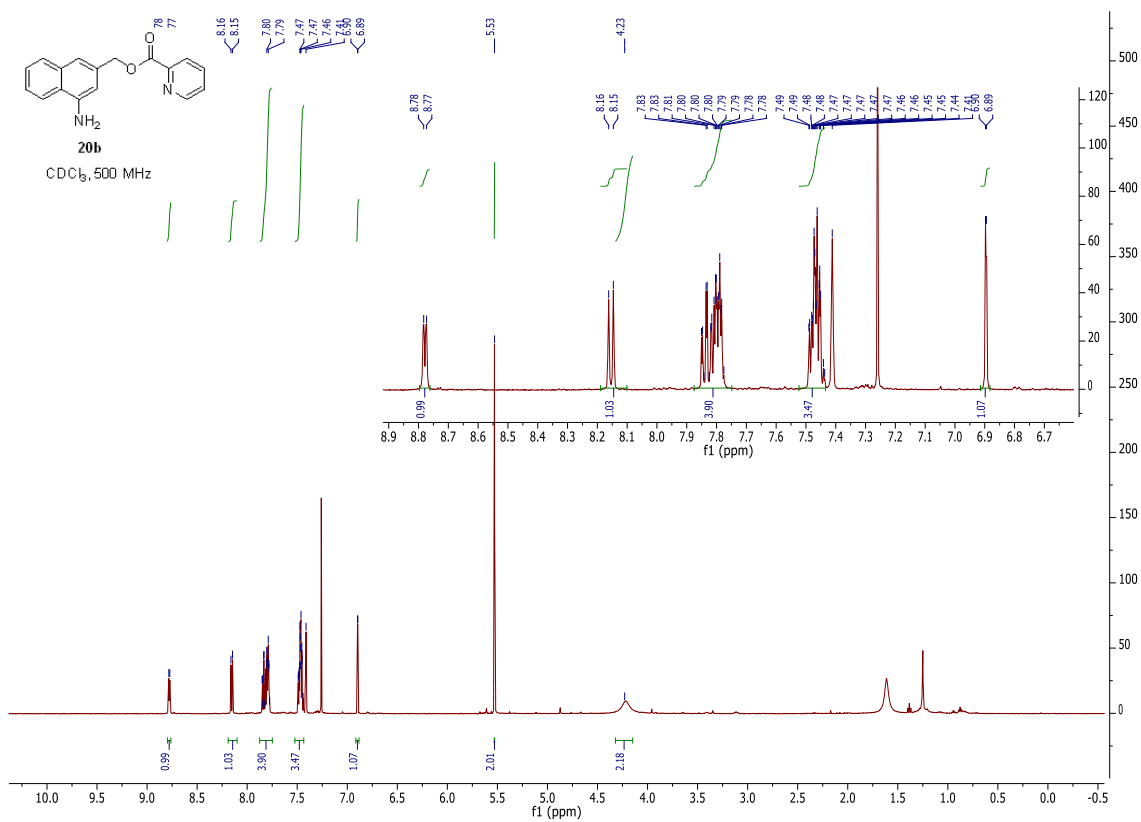

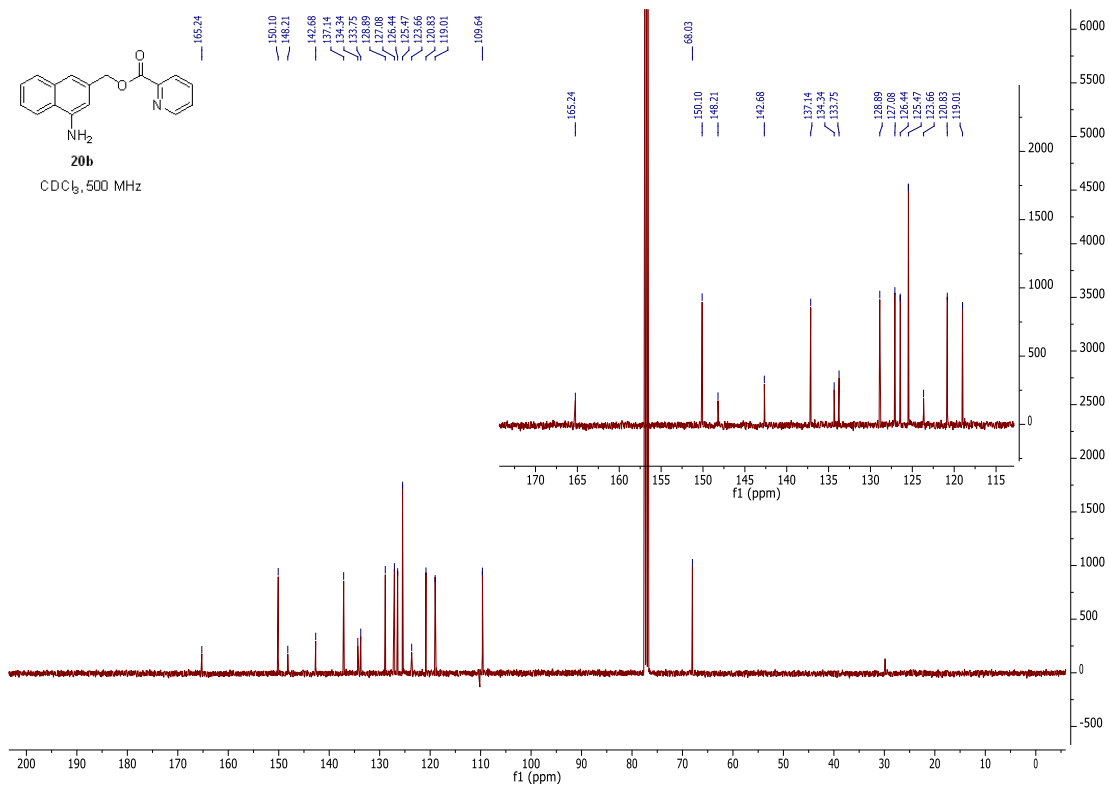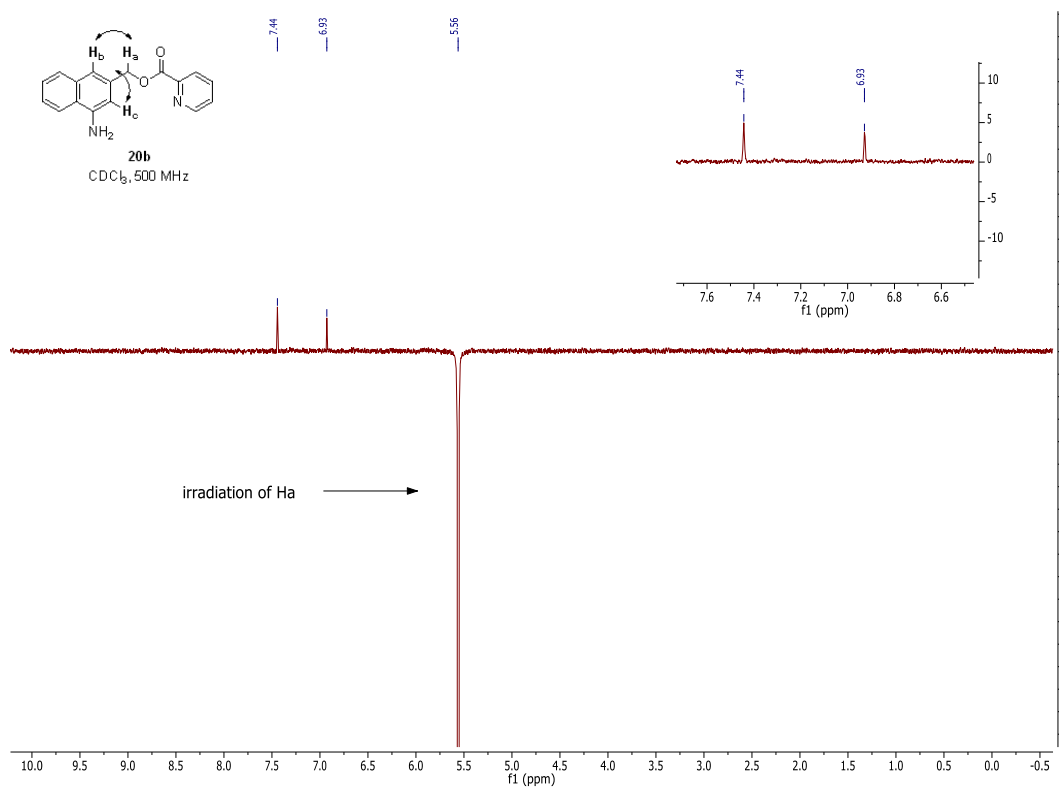



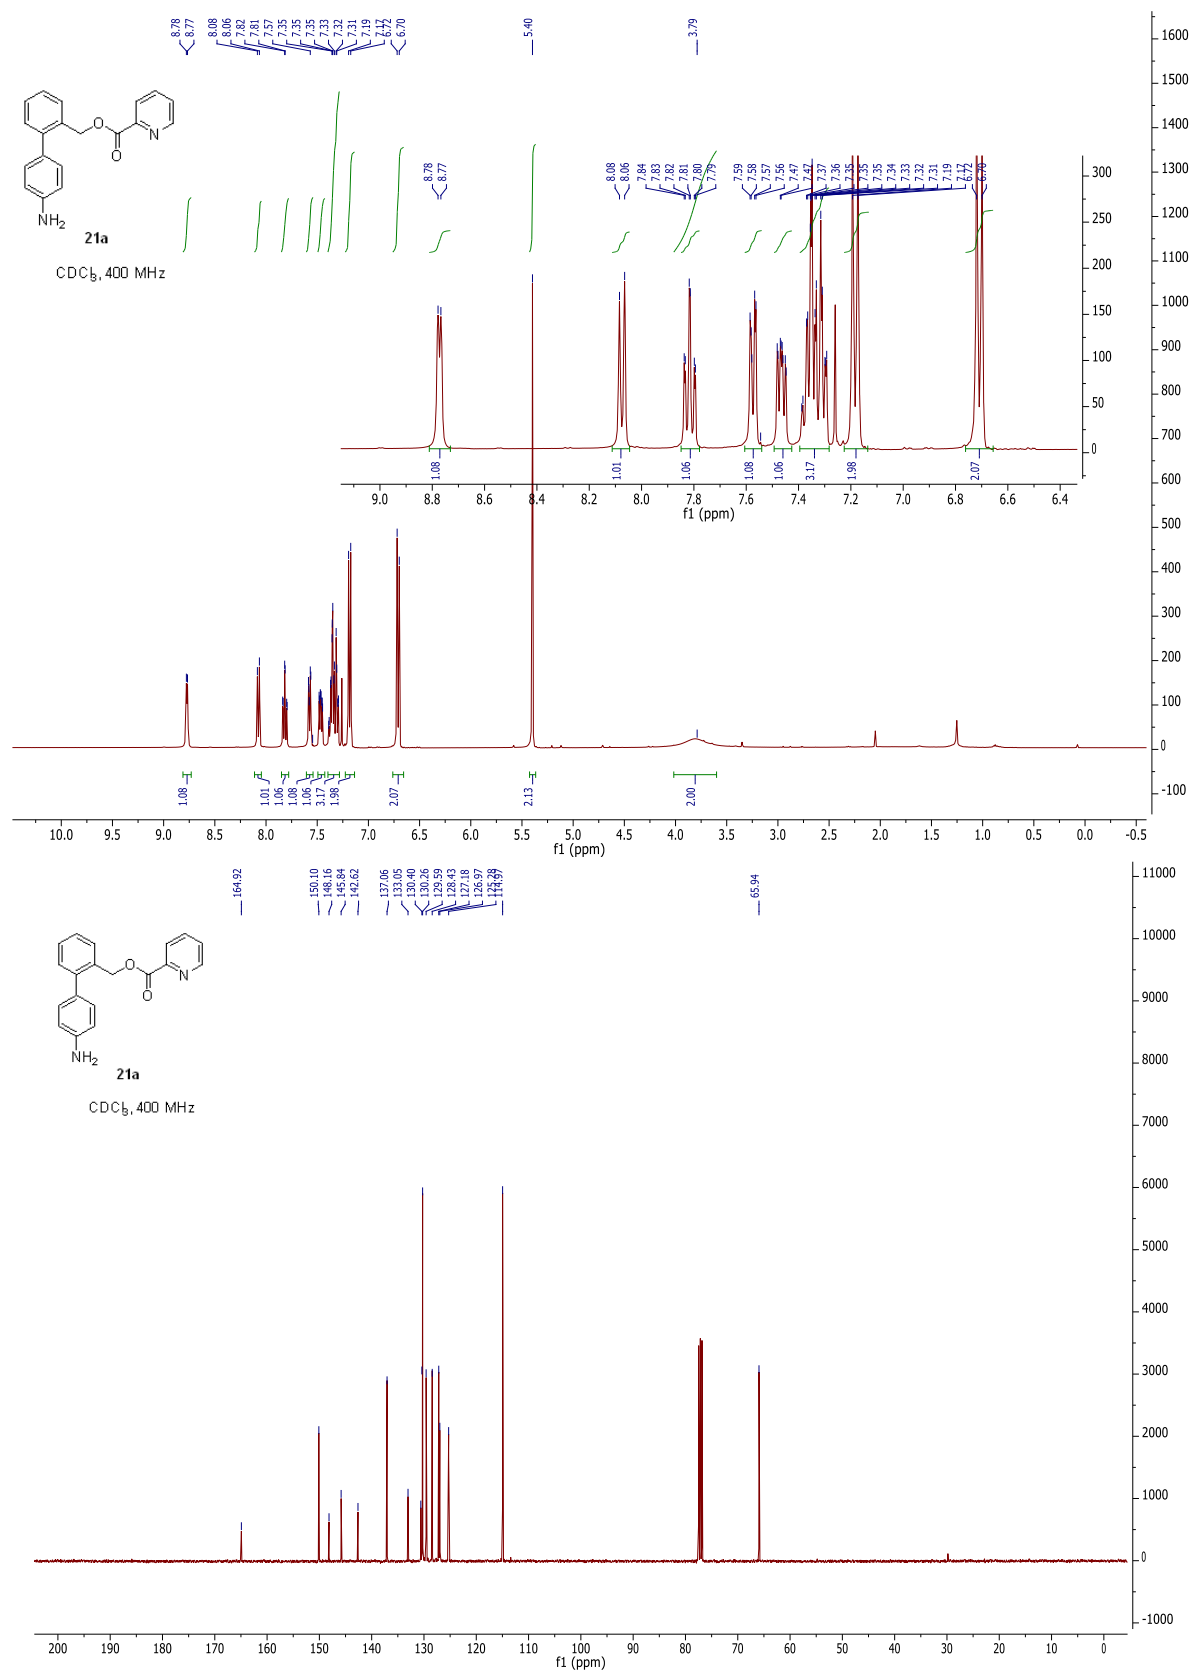

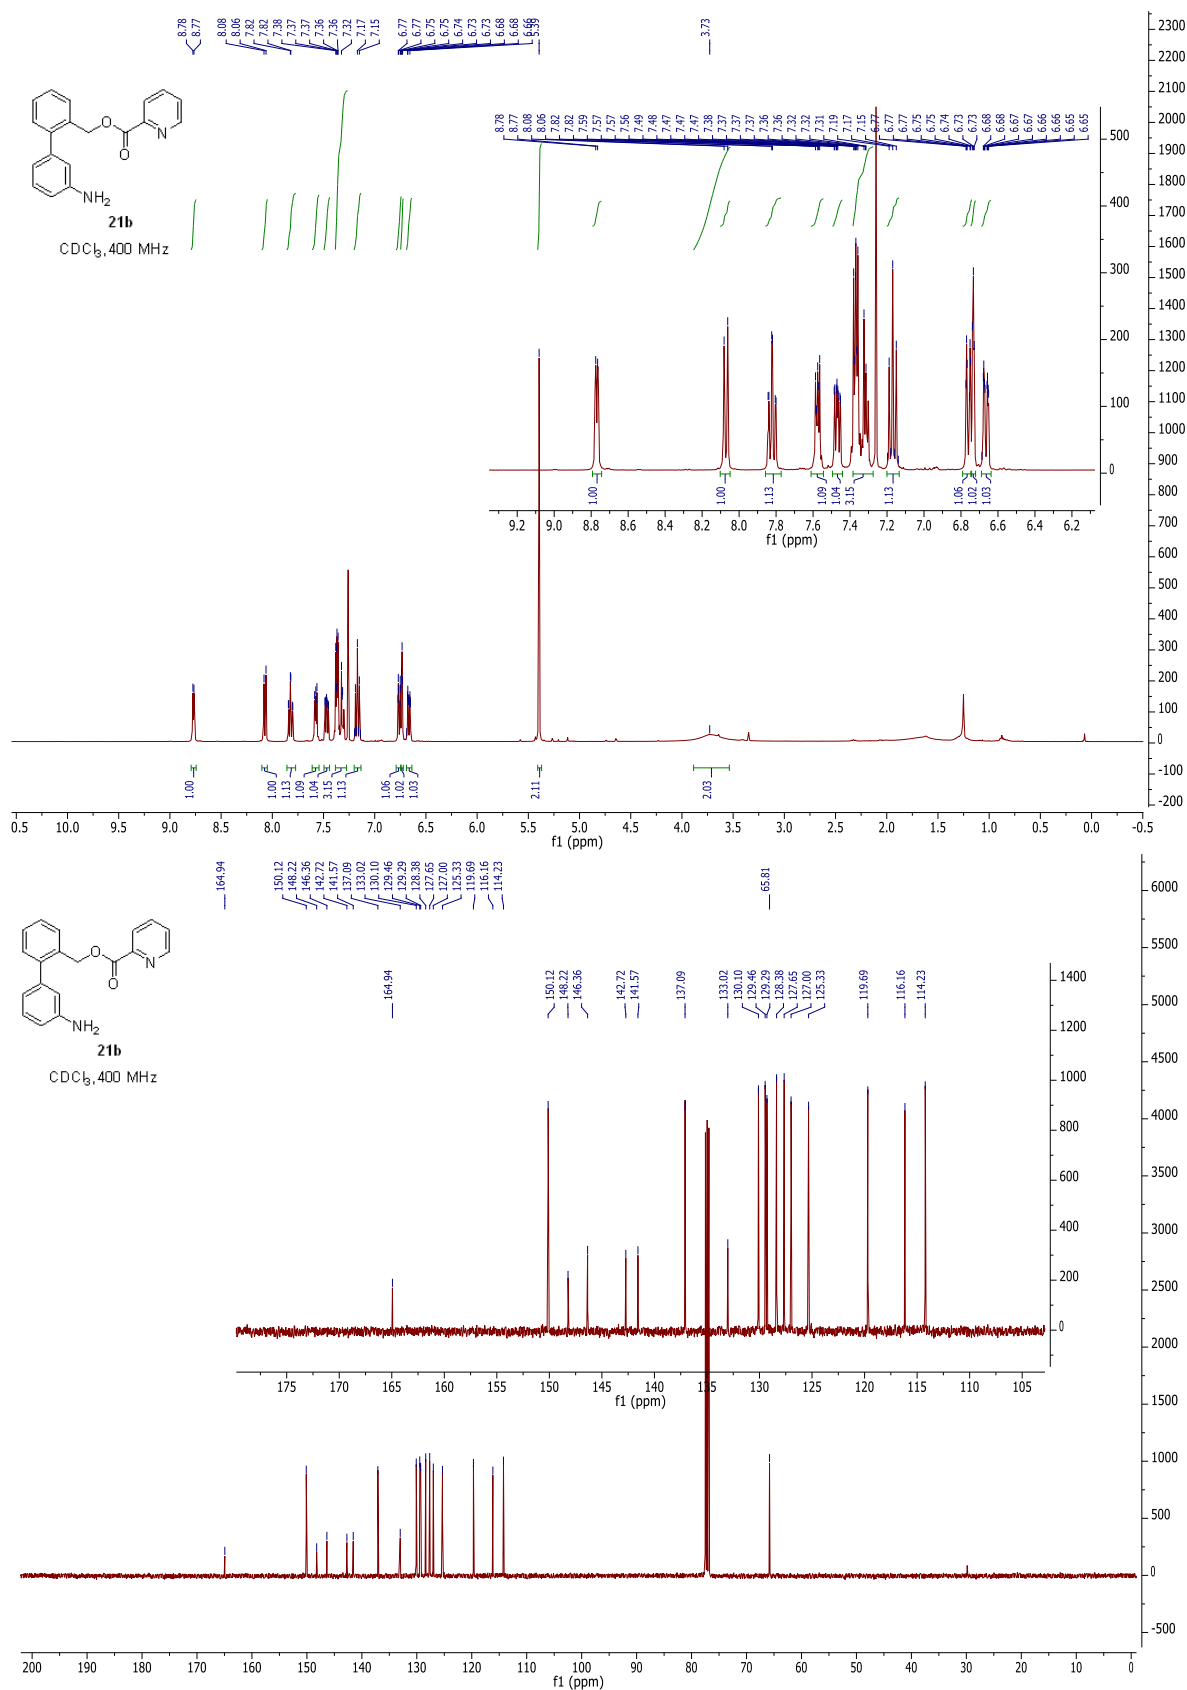

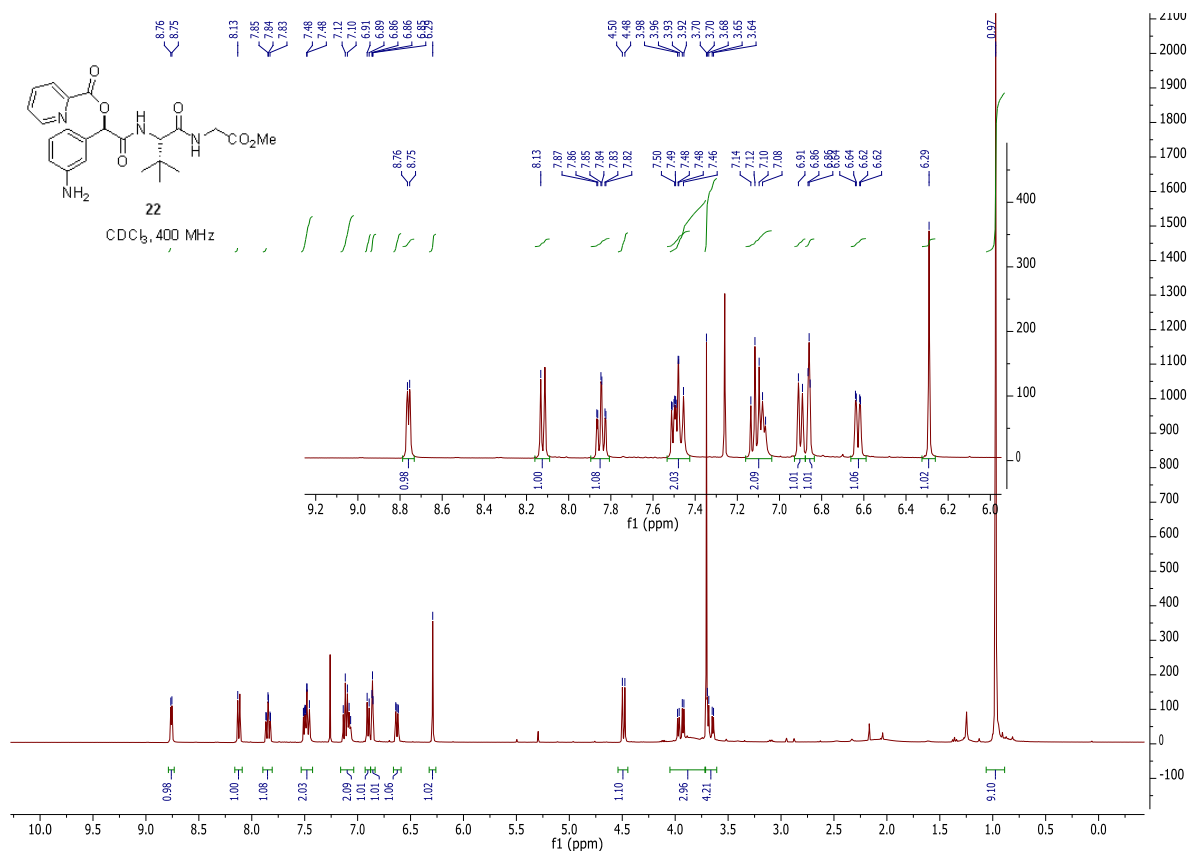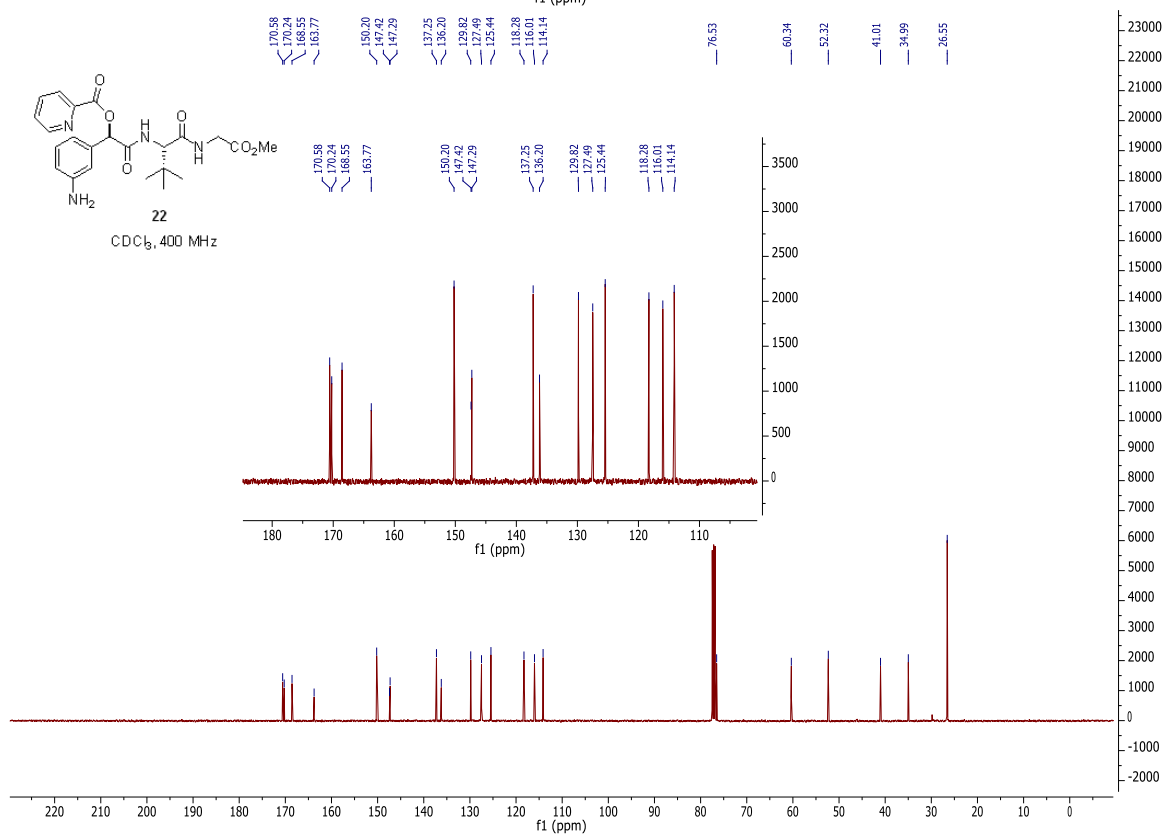

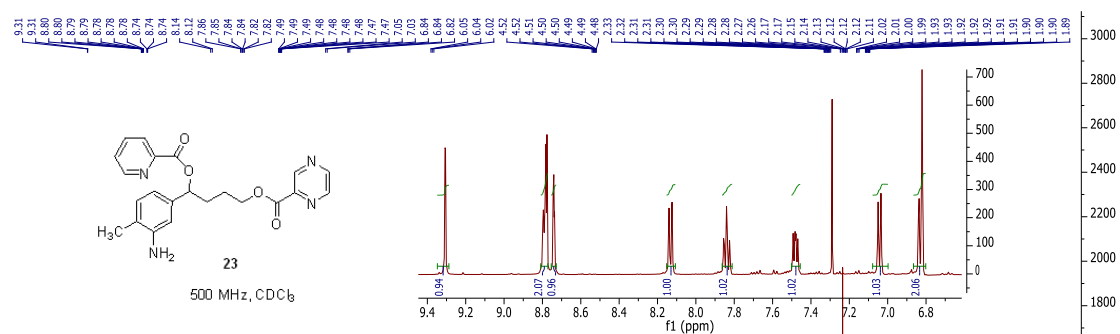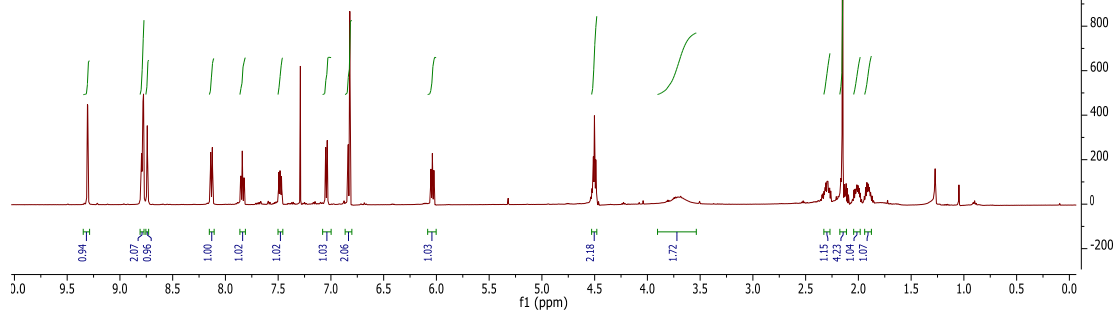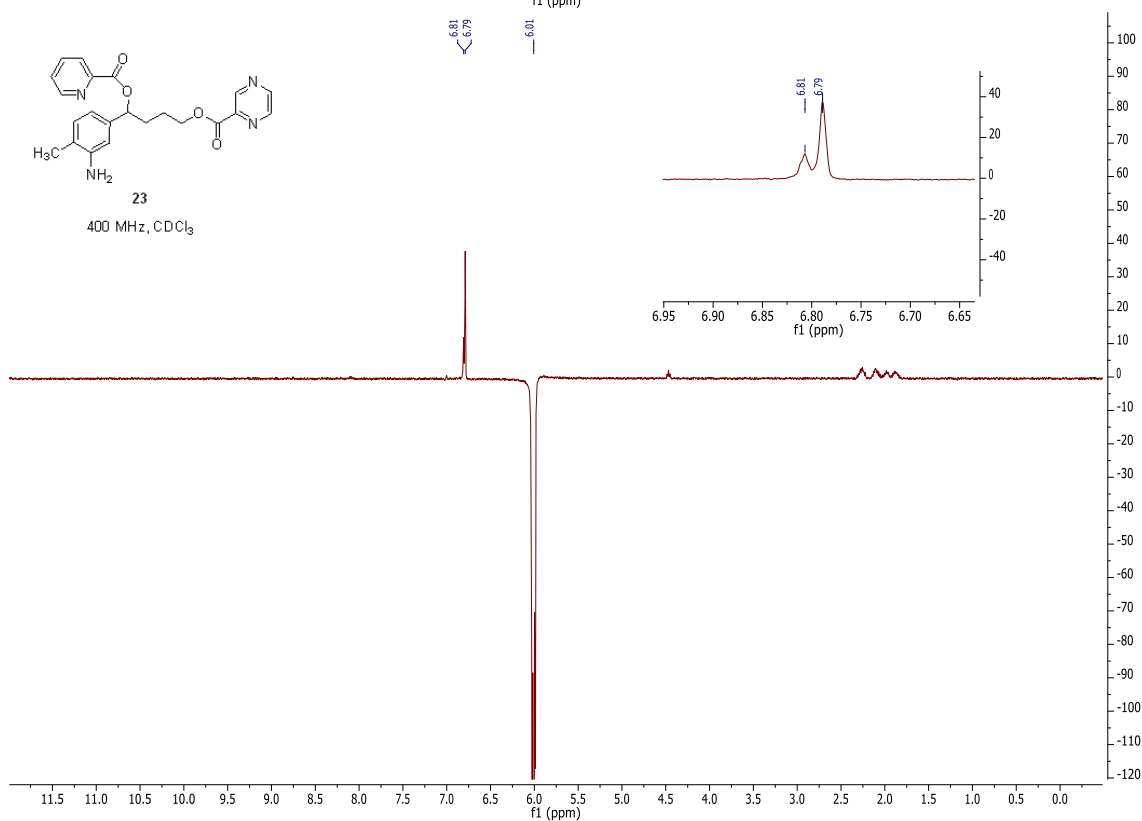

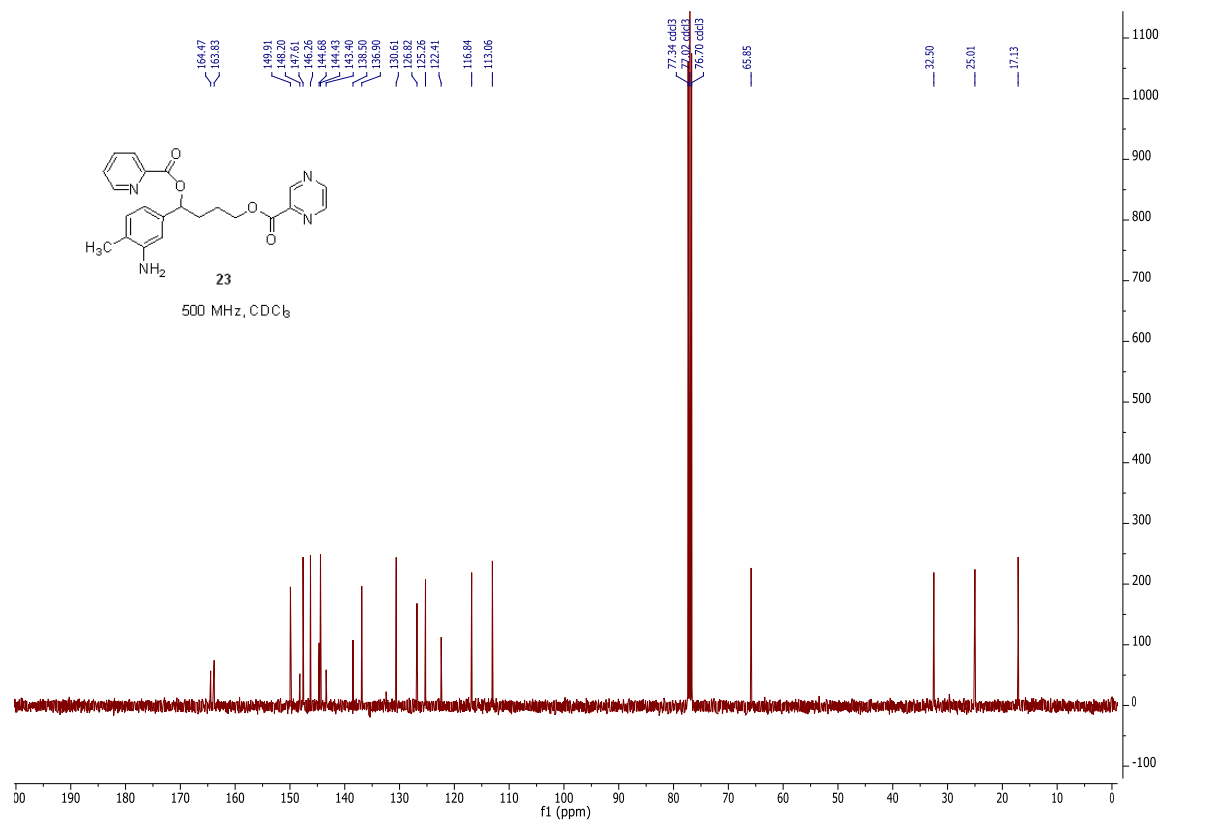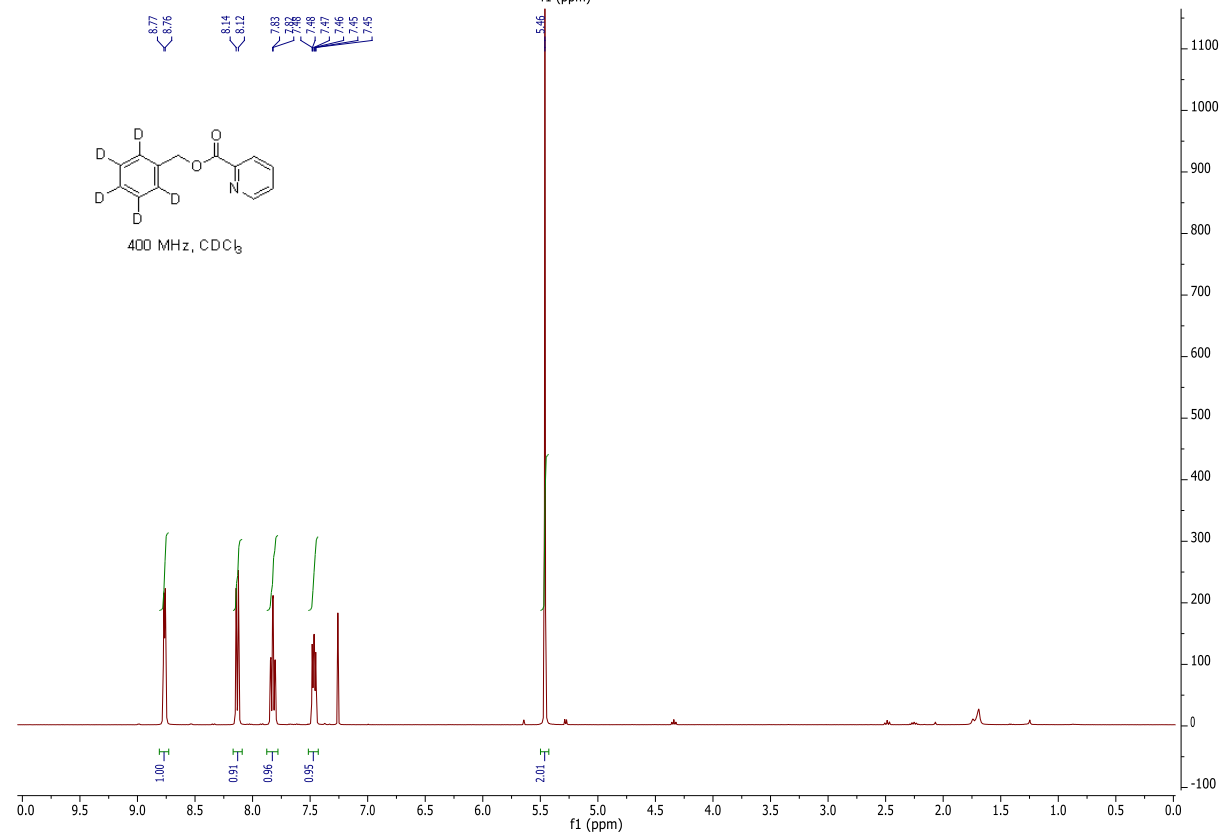

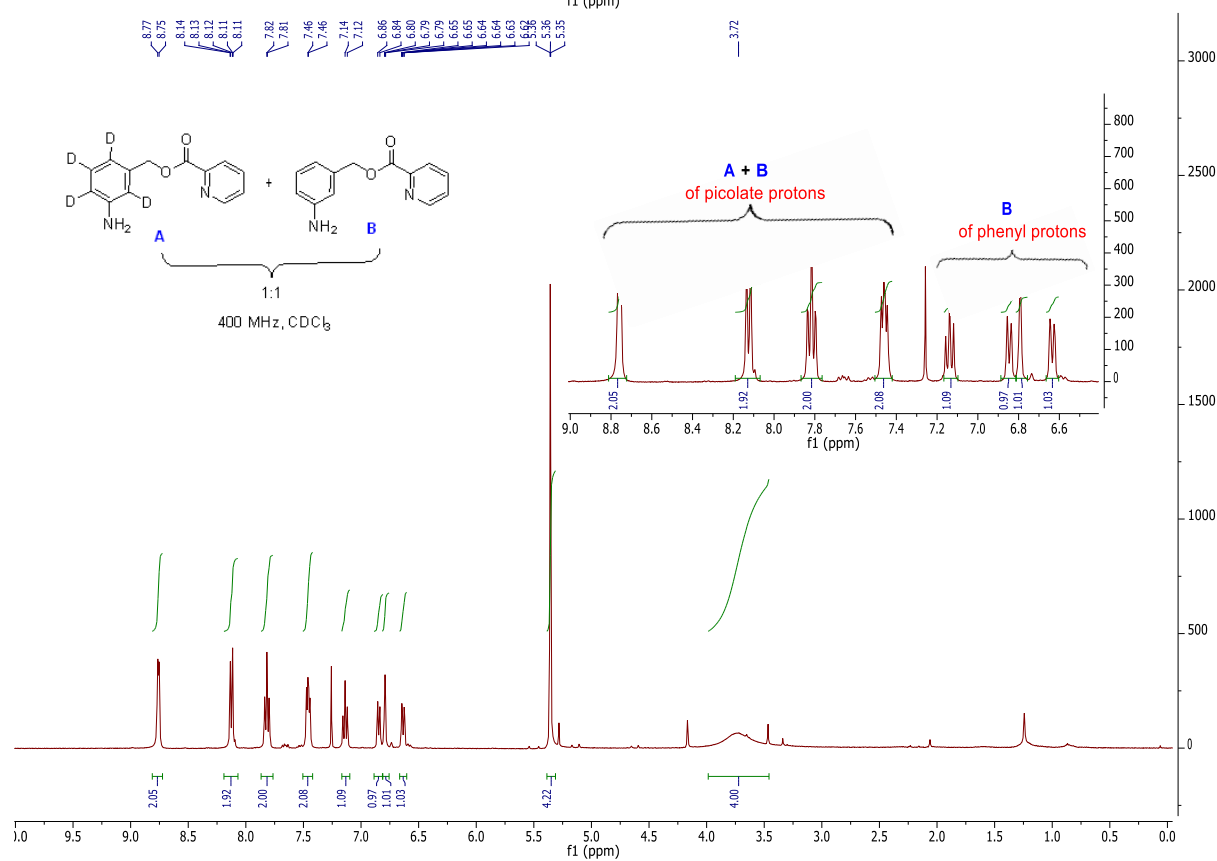

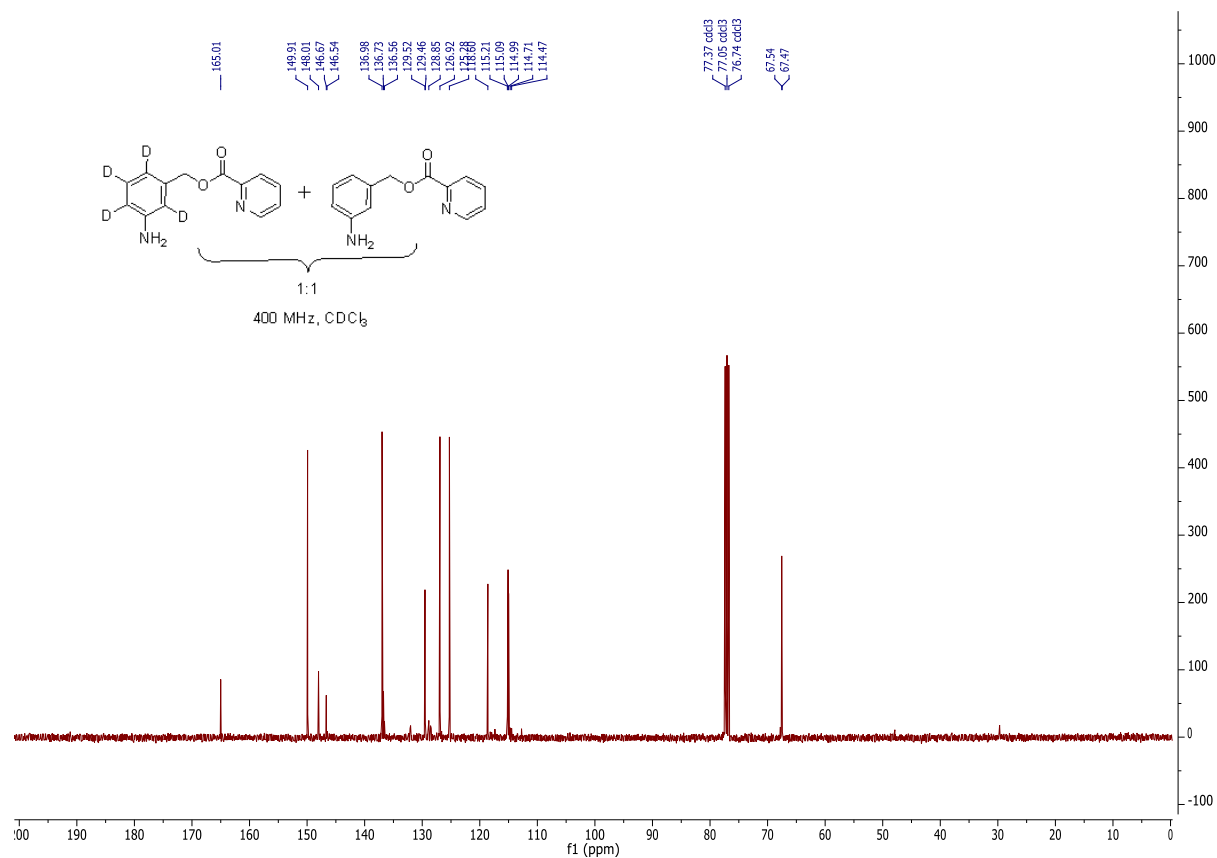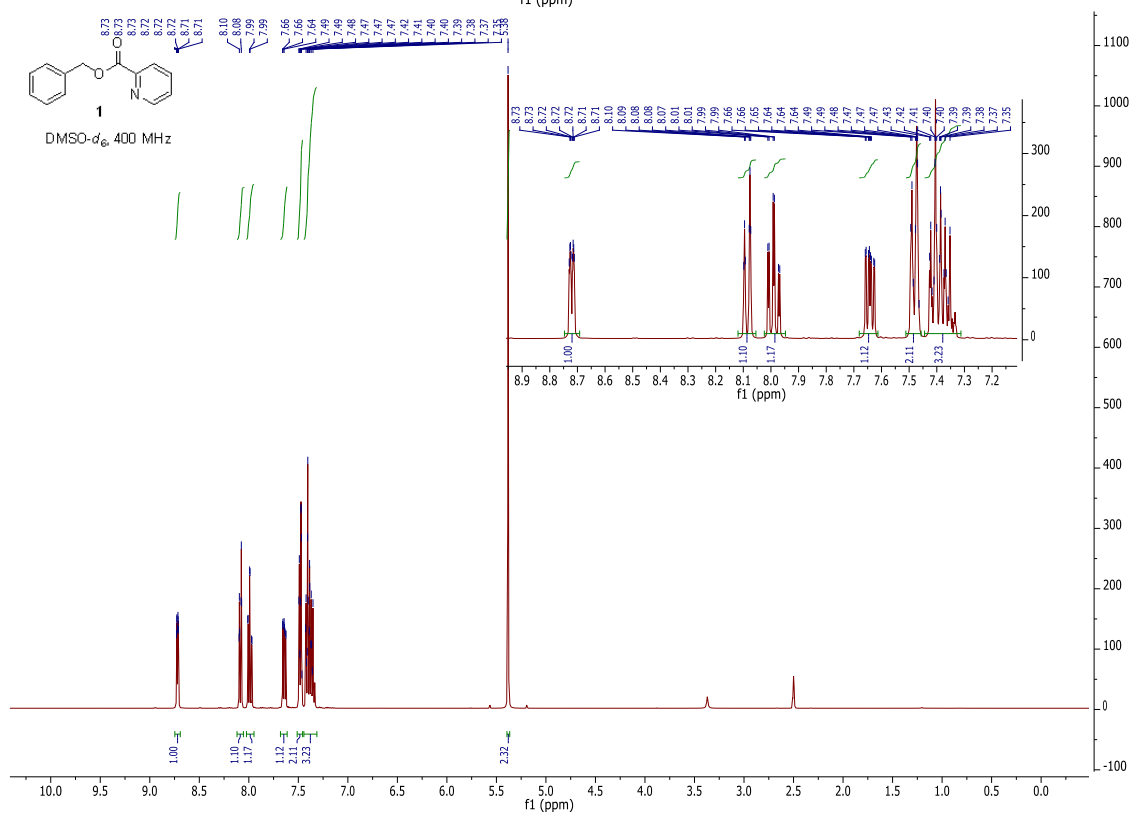

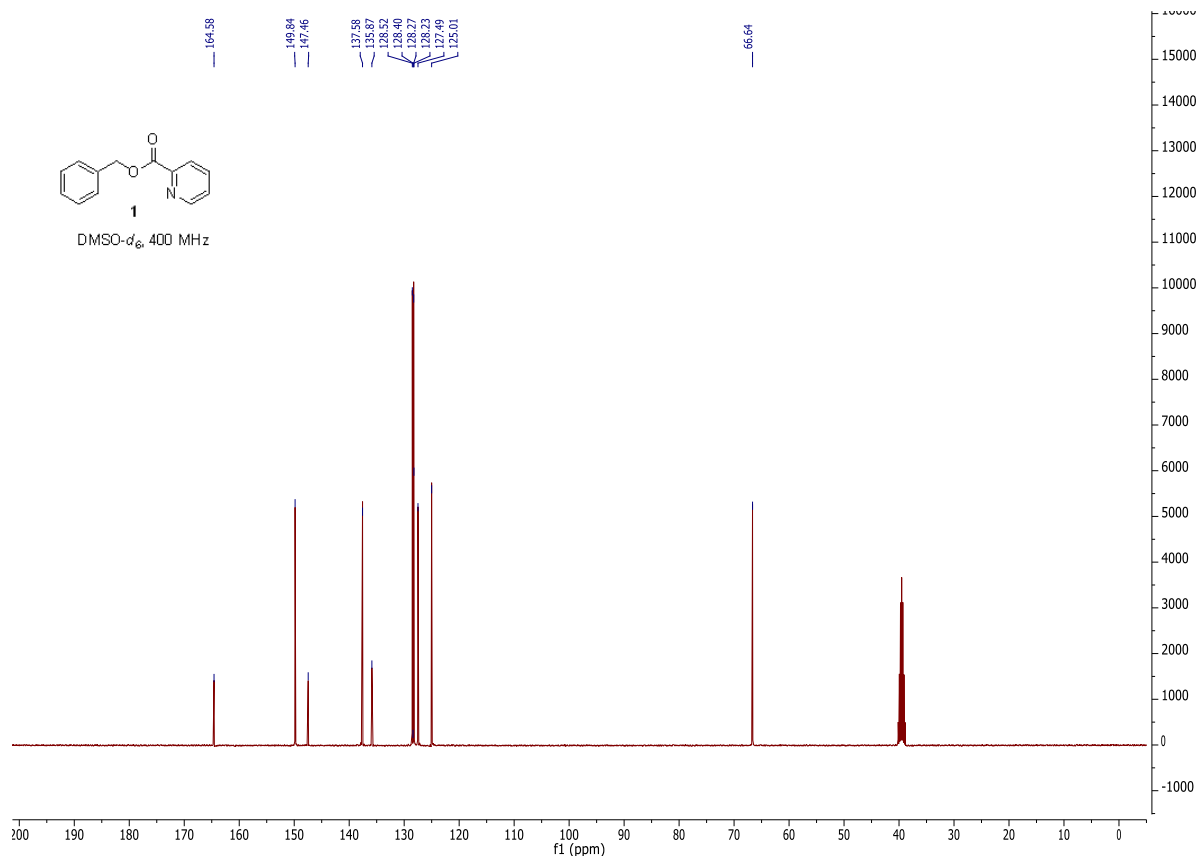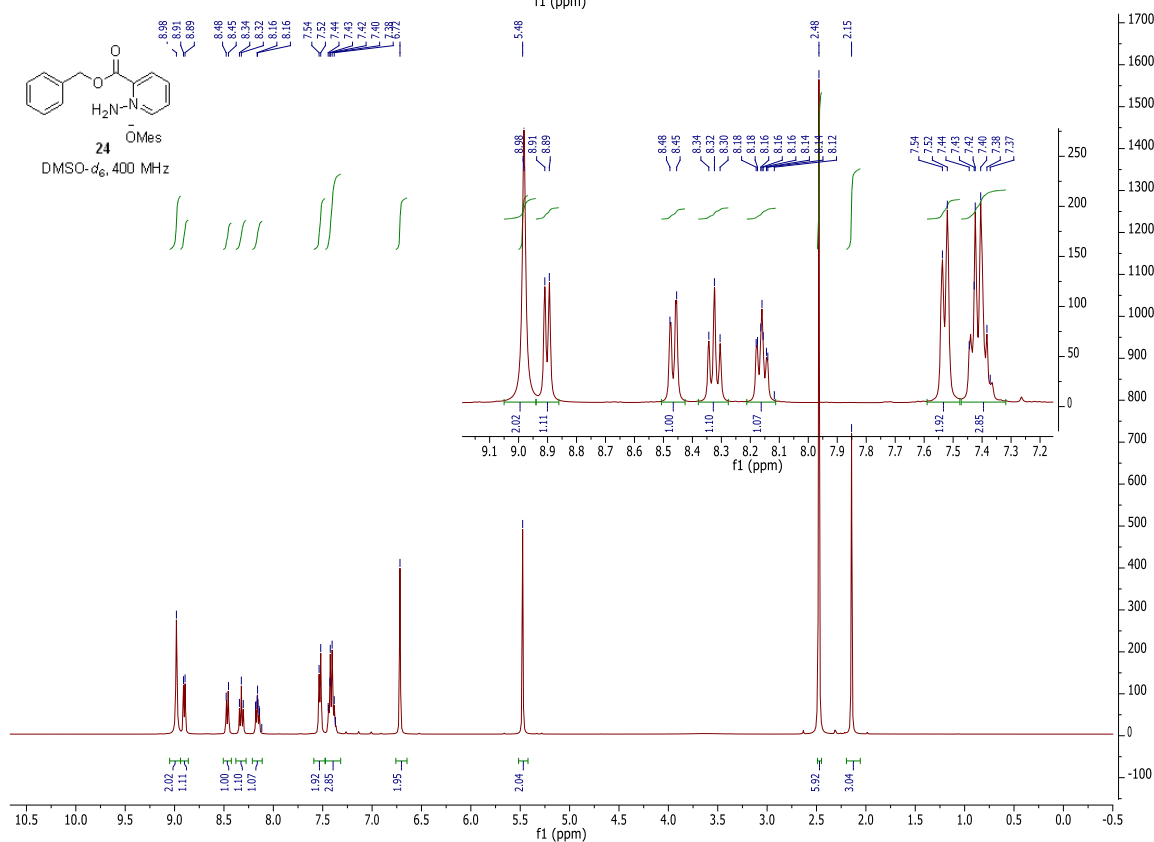



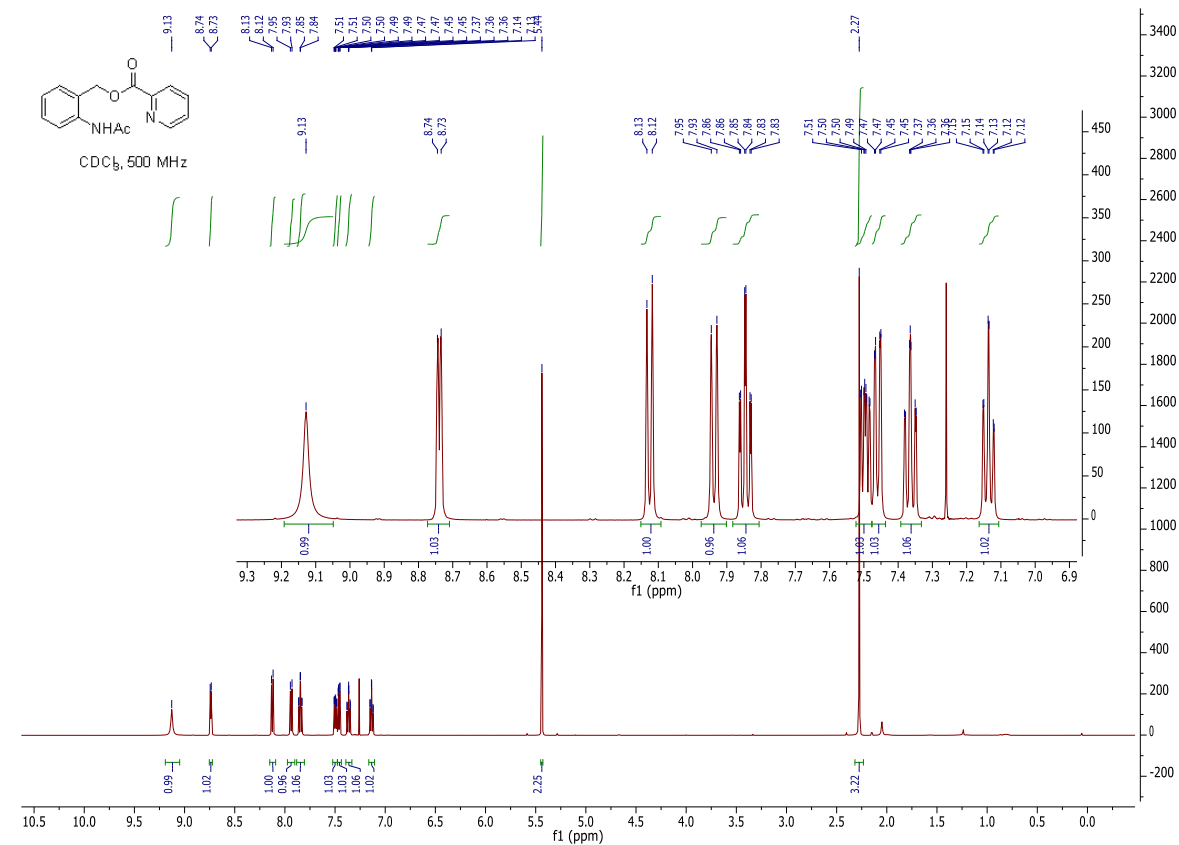

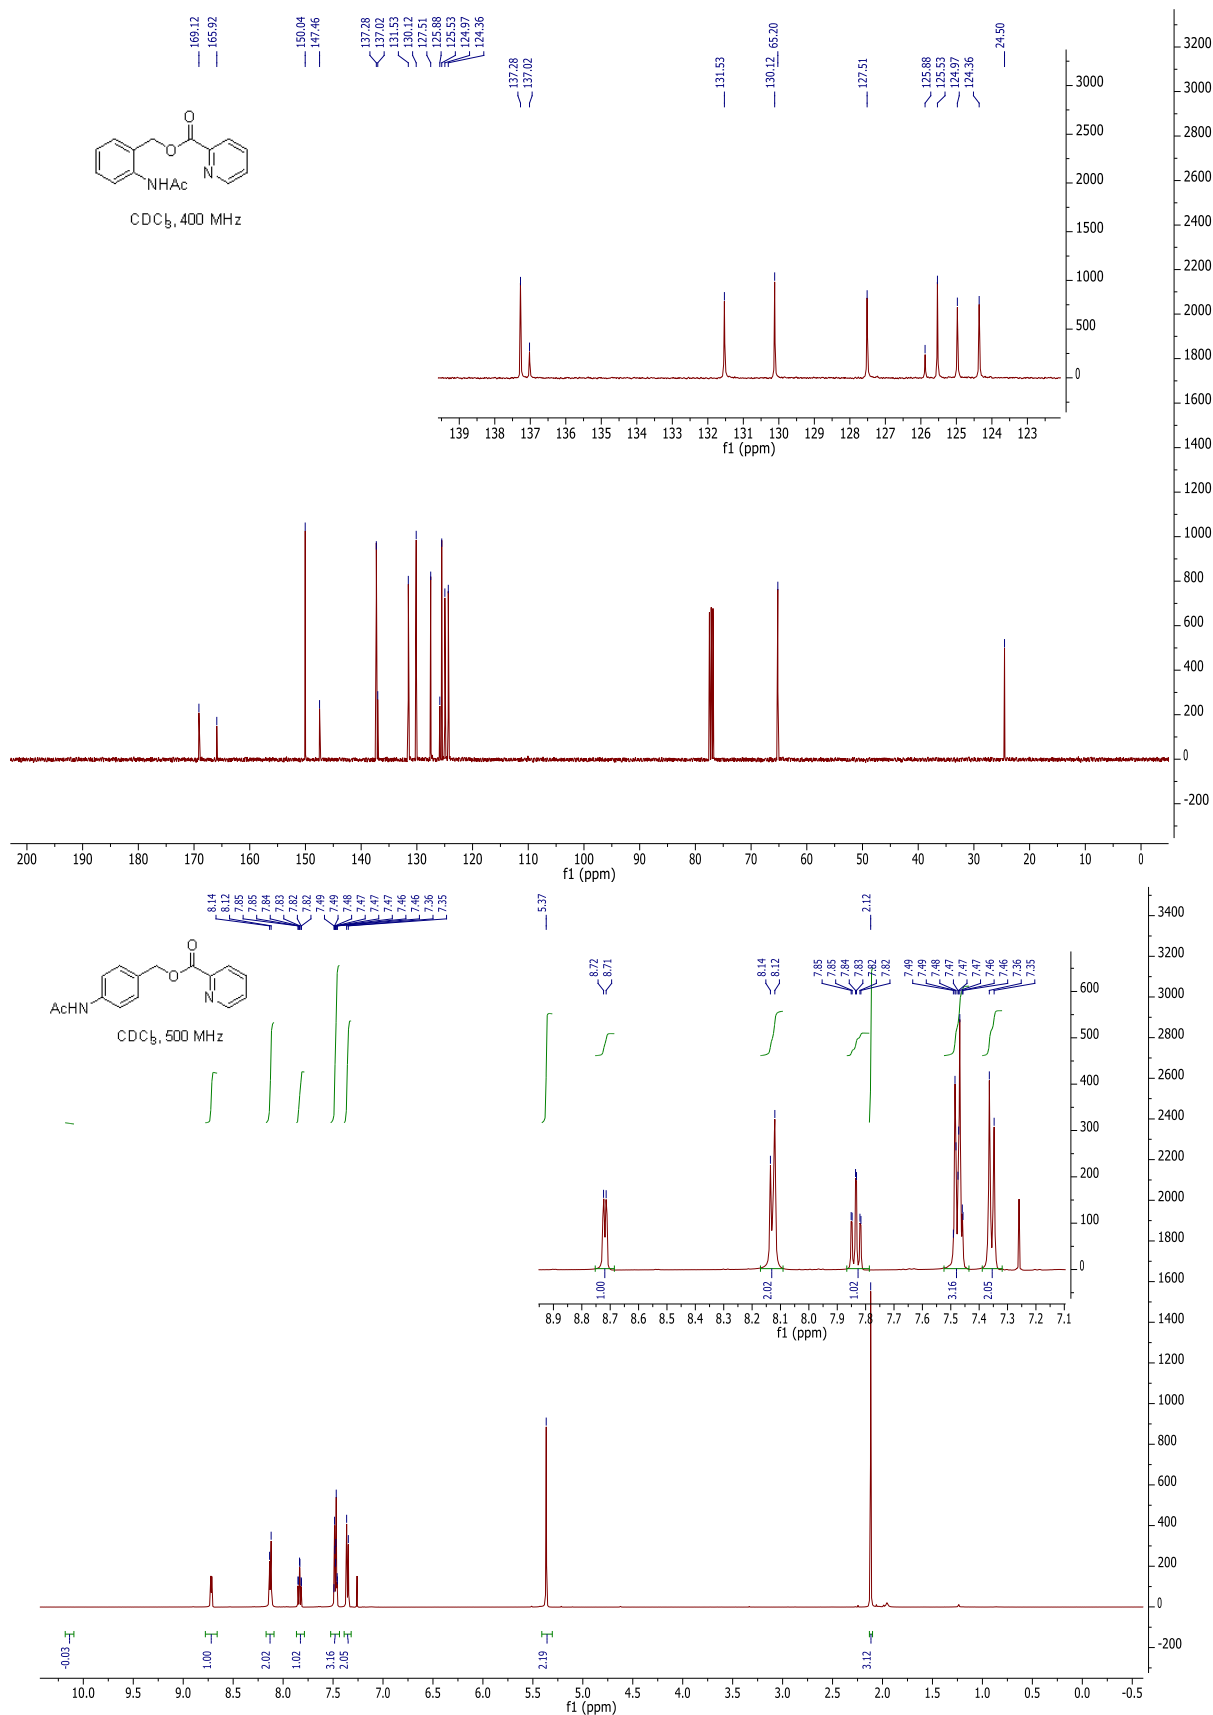

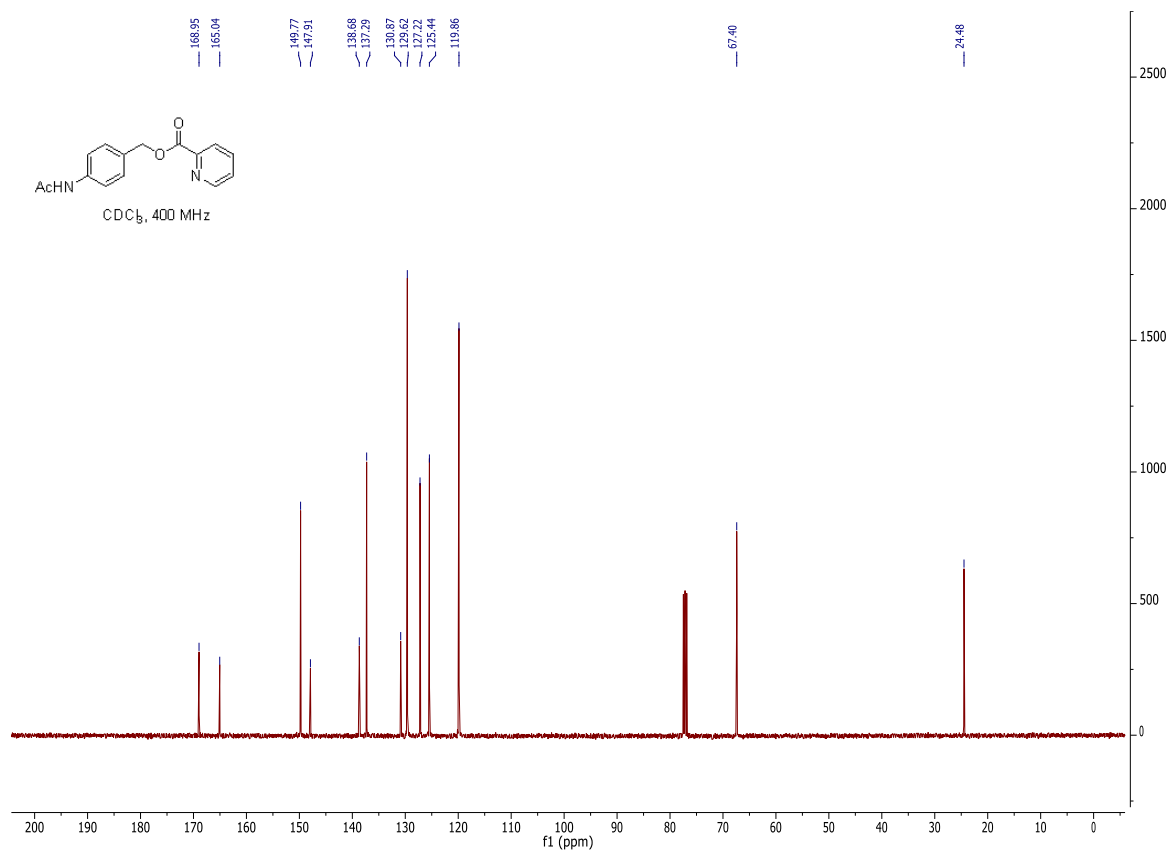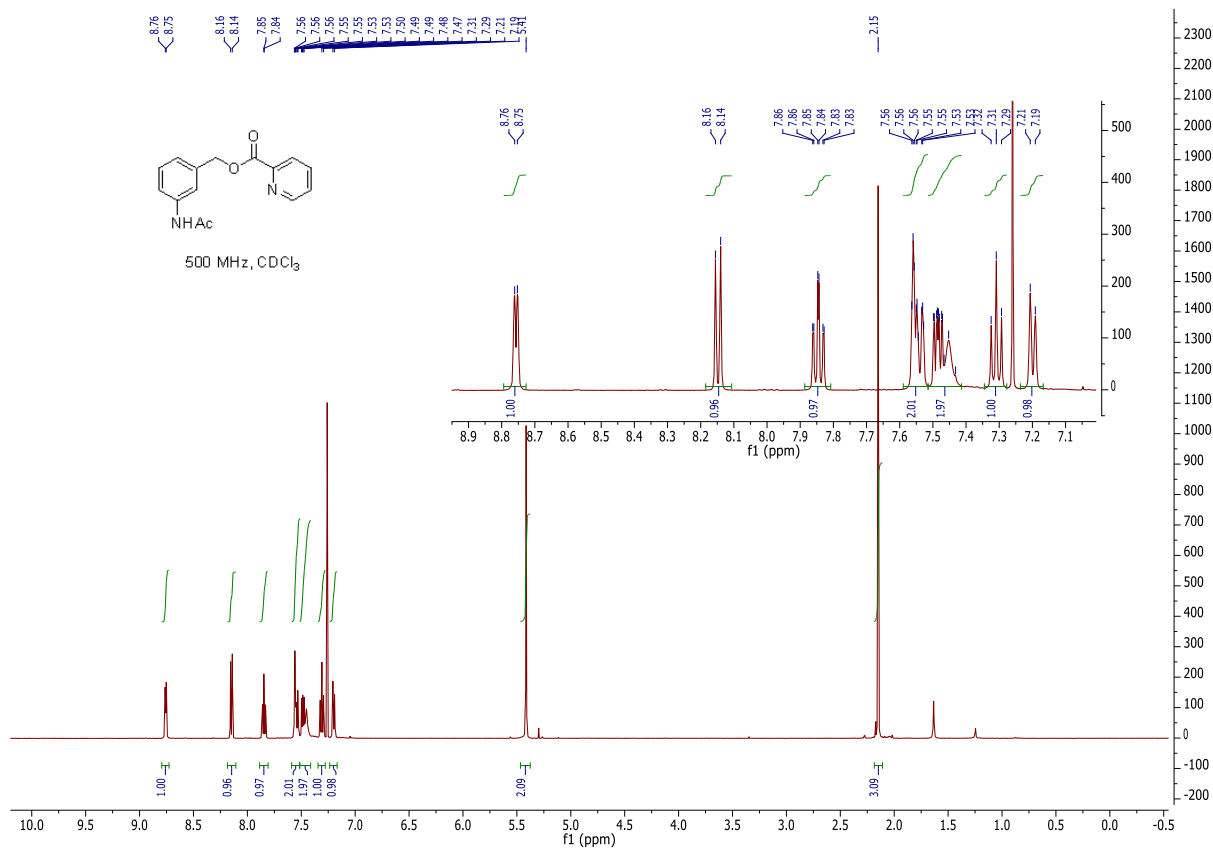

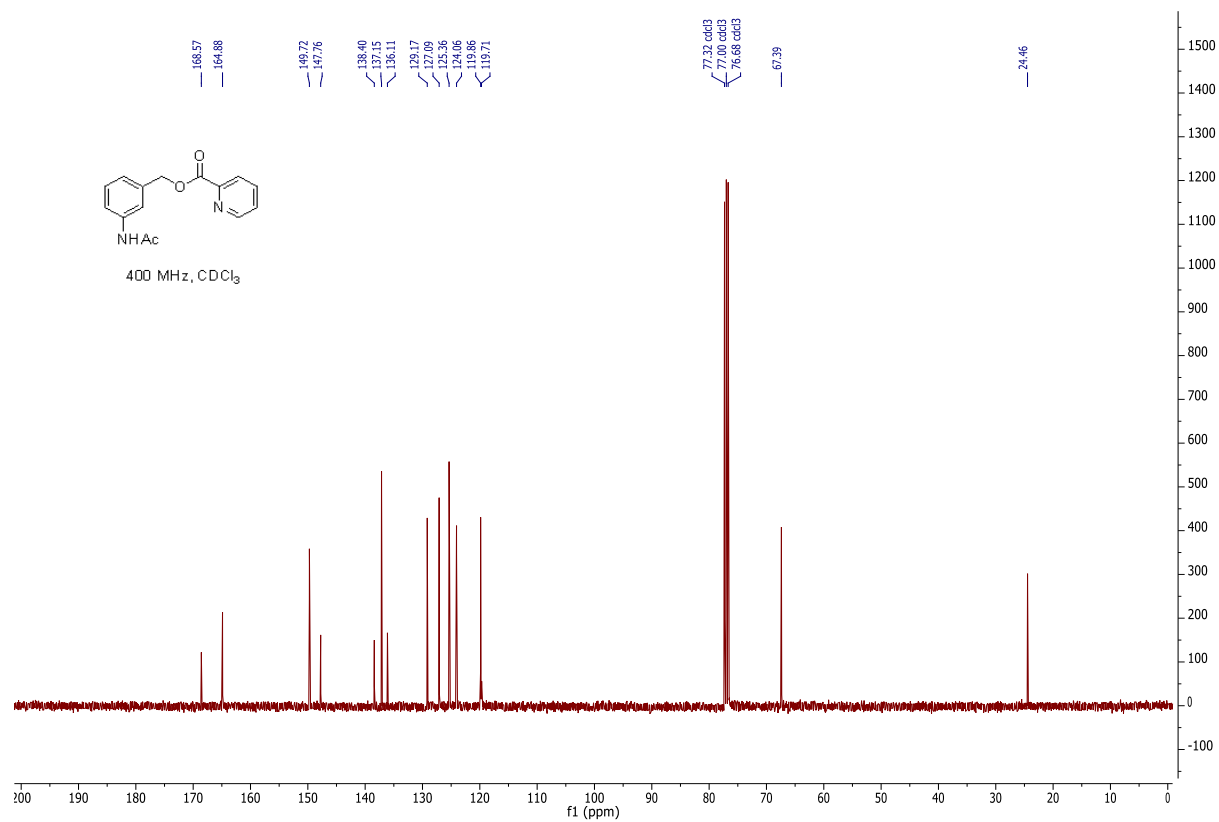

## HPLC Chromatograms

### Analysis conditions:

Column: Agilent Extend-C18,

Column size: 4.6 × 250 mm, 5 μm

Mobile phase: 20% CH<sub>3</sub>CN/H<sub>2</sub>O,

Flow rate: 1.0 mL/min.

Data File D:\CHEM32\1\DATA\UTSW001841.D

Sample Name: SAI-VII-241-MetaPure-2

```
=====
Acq. Operator   : Sailu
Acq. Instrument : Instrument 1          Location : Vial 41
Injection Date  : 11/7/2019 10:20:32 AM
                                           Inj Volume : 10 μl
Acq. Method     : D:\CHEM32\1\METHODS\SAILU_METAPROJECT.M
Last changed    : 11/7/2019 10:09:39 AM by Sailu
                  (modified after loading)
Analysis Method : D:\CHEM32\1\METHODS\SAILU_METAPROJECT.M
Last changed    : 11/8/2019 11:15:18 AM by Sailu
                  (modified after loading)
=====
```

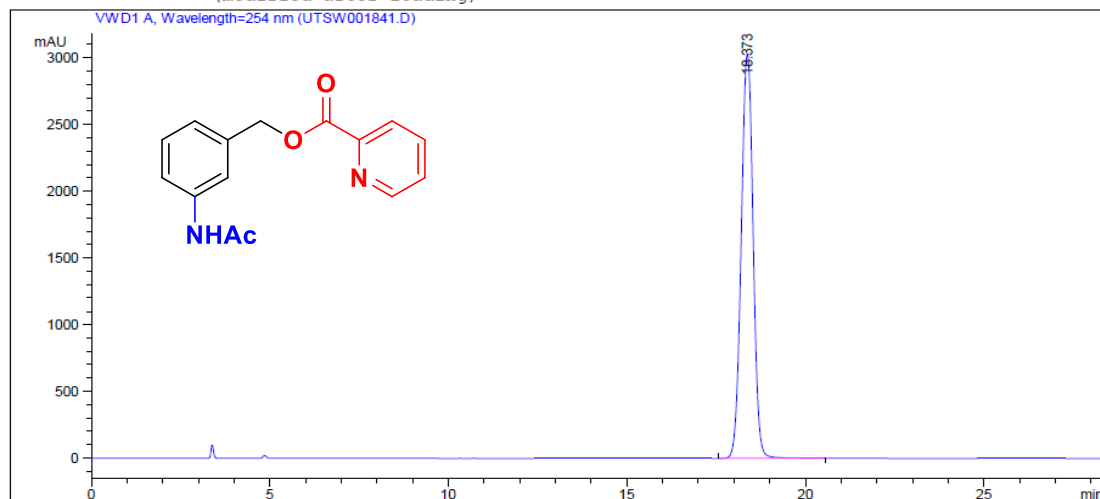

```
=====
Area Percent Report
=====
```

```
Sorted By      : Signal
Multiplier     : 1.0000
Dilution       : 1.0000
Use Multiplier & Dilution Factor with ISTDs
```

Signal 1: VWD1 A, Wavelength=254 nm

| Peak # | RetTime [min] | Type | Width [min] | Area mAU *s | Height [mAU] | Area %   |
|--------|---------------|------|-------------|-------------|--------------|----------|
| 1      | 18.373        | BB   | 0.3619      | 7.02322e4   | 3033.01147   | 100.0000 |

```
Totals :                      7.02322e4  3033.01147
```

**Figure S1a.** Regioselectivity studies –HPLC of analytically pure *N*-Ac 2 standard

## HPLC analysis conditions:

Column: Agilent Extend-C18,

Column size: 4.6 × 250 mm, 5 μm

Mobile phase: 20% CH<sub>3</sub>CN/H<sub>2</sub>O,

Flow rate: 1.0 mL/min.

Data File D:\CHEM32\1\DATA\UTSW001845.D

Sample Name: SAI-VII-241-Ortho-Pure-1

```
=====
Acq. Operator   : Sailu
Acq. Instrument : Instrument 1          Location : Vial 41
Injection Date  : 11/7/2019 12:48:04 PM
                                           Inj Volume : 10 μl
Acq. Method     : D:\CHEM32\1\METHODS\SAILU_METAPROJECT.M
Last changed    : 11/7/2019 12:45:43 PM by Sailu
                  (modified after loading)
Analysis Method : D:\CHEM32\1\METHODS\SAILU_METAPROJECT.M
Last changed    : 11/8/2019 11:15:18 AM by Sailu
                  (modified after loading)
=====
```

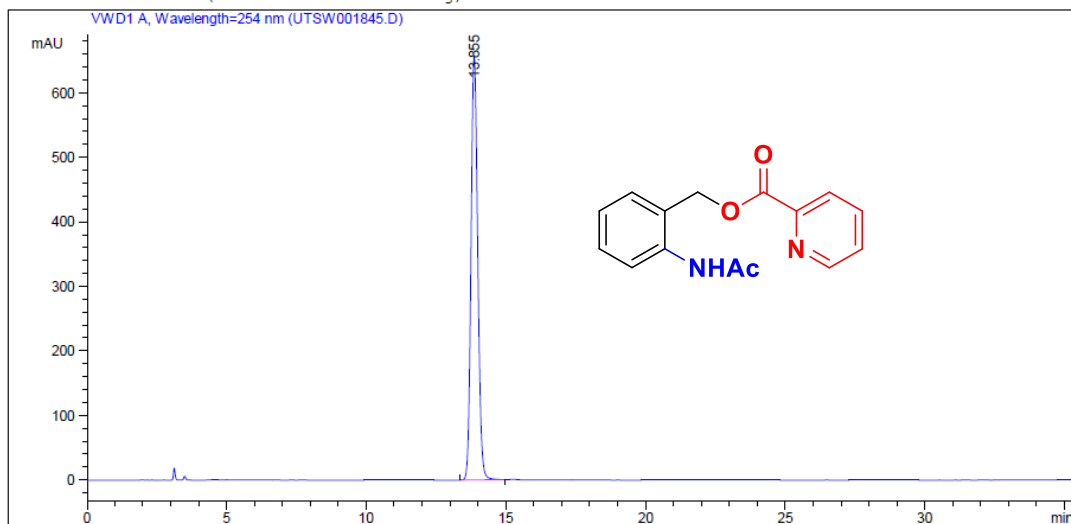

```
=====
Area Percent Report
=====
```

```
Sorted By      : Signal
Multiplier     : 1.0000
Dilution       : 1.0000
Use Multiplier & Dilution Factor with ISTDs
```

Signal 1: VWD1 A, Wavelength=254 nm

| Peak #   | RetTime [min] | Type | Width [min] | Area mAU  | Height [mAU] | Area %   |
|----------|---------------|------|-------------|-----------|--------------|----------|
| 1        | 13.855        | BB   | 0.2599      | 1.10342e4 | 657.31812    | 100.0000 |
| Totals : |               |      |             | 1.10342e4 | 657.31812    |          |

**Figure S1b.** Regioselectivity studies –HPLC of Analytically pure *ortho*-NHAc **1** standard

## HPLC analysis conditions:

Column: Agilent Extend-C18,

Column size: 4.6 × 250 mm, 5 μm

Mobile phase: 20% CH<sub>3</sub>CN/H<sub>2</sub>O,

Flow rate: 1.0 mL/min.

Data File D:\CHEM32\1\DATA\UTSW001844.D

Sample Name: SAI-VII-241-Para-Pure-2

```
=====
Acq. Operator   : Sailu
Acq. Instrument : Instrument 1          Location : Vial 41
Injection Date  : 11/7/2019 12:10:09 PM
                                           Inj Volume : 10 μl
Acq. Method     : D:\CHEM32\1\METHODS\SAILU_METAPROJECT.M
Last changed    : 11/7/2019 12:07:55 PM by Sailu
                  (modified after loading)
Analysis Method : D:\CHEM32\1\METHODS\SAILU_METAPROJECT.M
Last changed    : 11/8/2019 11:15:18 AM by Sailu
                  (modified after loading)
=====
```

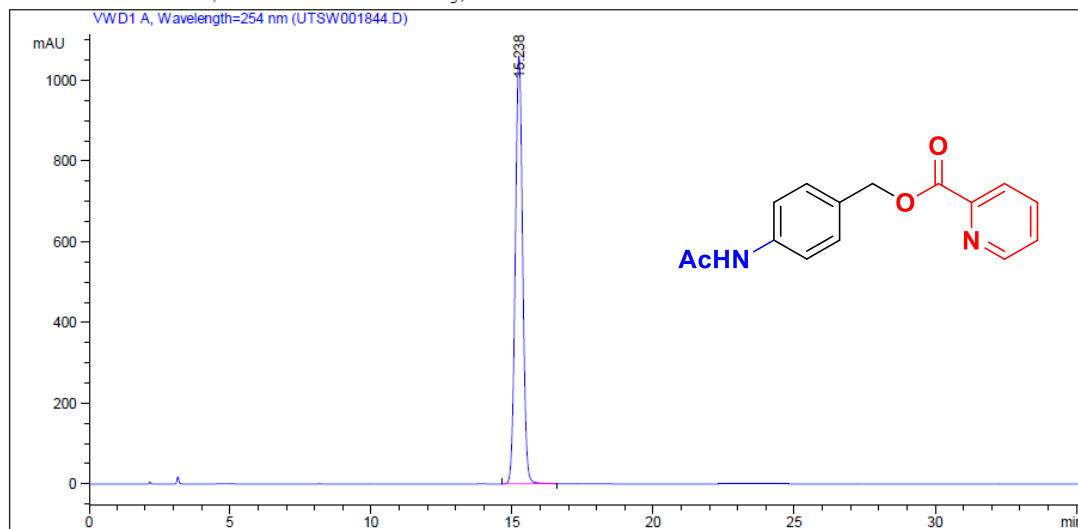

### Area Percent Report

```
=====
Sorted By      : Signal
Multiplier     : 1.0000
Dilution       : 1.0000
Use Multiplier & Dilution Factor with ISTDs
=====
```

Signal 1: VWD1 A, Wavelength=254 nm

| Peak # | RetTime [min] | Type | Width [min] | Area mAU*s | Height [mAU] | Area %   |
|--------|---------------|------|-------------|------------|--------------|----------|
| 1      | 15.238        | BB   | 0.2813      | 1.92083e4  | 1060.12476   | 100.0000 |

Totals : 1.92083e4 1060.12476

**Figure S1c.** Regioselectivity studies –HPLC of analytically pure *para*-NHAc **1** standard

## HPLC analysis conditions:

Column: Agilent Extend-C18,

Column size: 4.6 × 250 mm, 5 μm

Mobile phase: 20% CH<sub>3</sub>CN/H<sub>2</sub>O,

Flow rate: 1.0 mL/min.

Data File D:\CHEM32\1\DATA\UTSW001848.D

Sample Name: SAI-VII-241-CrudeMeta-2

```
=====
Acq. Operator   : Sailu
Acq. Instrument : Instrument 1                Location : Vial 41
Injection Date  : 11/7/2019 4:56:22 PM
                                           Inj Volume : 10 μl
Acq. Method     : D:\CHEM32\1\METHODS\SAILU_METAPROJECT.M
Last changed    : 11/7/2019 4:45:21 PM by Sailu
                  (modified after loading)
Analysis Method : D:\CHEM32\1\METHODS\SAILU_METAPROJECT.M
Last changed    : 11/8/2019 11:15:18 AM by Sailu
                  (modified after loading)
=====
```

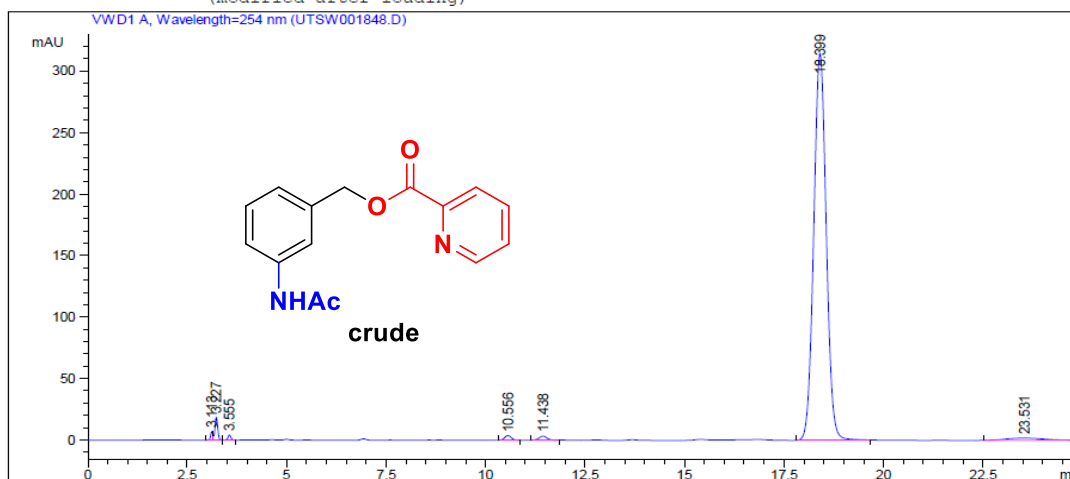

### Area Percent Report

```
Sorted By      : Signal
Multiplier     : 1.0000
Dilution       : 1.0000
Use Multiplier & Dilution Factor with ISTDs
```

Signal 1: VWD1 A, Wavelength=254 nm

| Peak # | RetTime [min] | Type | Width [min] | Area mAU   | Height [mAU] | Area %  |
|--------|---------------|------|-------------|------------|--------------|---------|
| 1      | 3.113         | VV   | 0.0636      | 28.35105   | 6.94745      | 0.3925  |
| 2      | 3.227         | VV   | 0.0750      | 88.90837   | 18.50697     | 1.2309  |
| 3      | 3.555         | VB   | 0.0807      | 22.55161   | 4.25755      | 0.3122  |
| 4      | 10.556        | BB   | 0.1847      | 45.28659   | 3.82558      | 0.6270  |
| 5      | 11.438        | BB   | 0.2199      | 46.93131   | 3.29731      | 0.6497  |
| 6      | 18.399        | BB   | 0.3395      | 6871.08936 | 314.26385    | 95.1256 |
| 7      | 23.531        | BBA  | 0.8870      | 120.05857  | 1.81779      | 1.6621  |

Totals : 7223.17686 352.91651

**Figure S1d.** Regioselectivity studies –HPLC of crude *N*-Ac **2** reaction mixture



## HPLC analysis conditions:

Column: Agilent Extend-C18,

Column size: 4.6 × 250 mm, 5 μm

Mobile phase: 20% CH<sub>3</sub>CN/H<sub>2</sub>O,

Flow rate: 1.0 mL/min

Data File D:\CHEM32\1\DATA\UTSW001849.D  
Sample Name: SAI-VII-241-CrudeMetawith2%ortho-1

```
=====
Acq. Operator   : Sailu
Acq. Instrument : Instrument 1          Location : Vial 41
Injection Date  : 11/7/2019 5:33:50 PM      Inj Volume : 10 μl
Acq. Method     : D:\CHEM32\1\METHODS\SAILU_METAPROJECT.M
Last changed    : 11/7/2019 5:21:42 PM by Sailu
                  (modified after loading)
Analysis Method : D:\CHEM32\1\METHODS\SAILU_METAPROJECT.M
Last changed    : 11/8/2019 11:15:18 AM by Sailu
                  (modified after loading)
=====
```

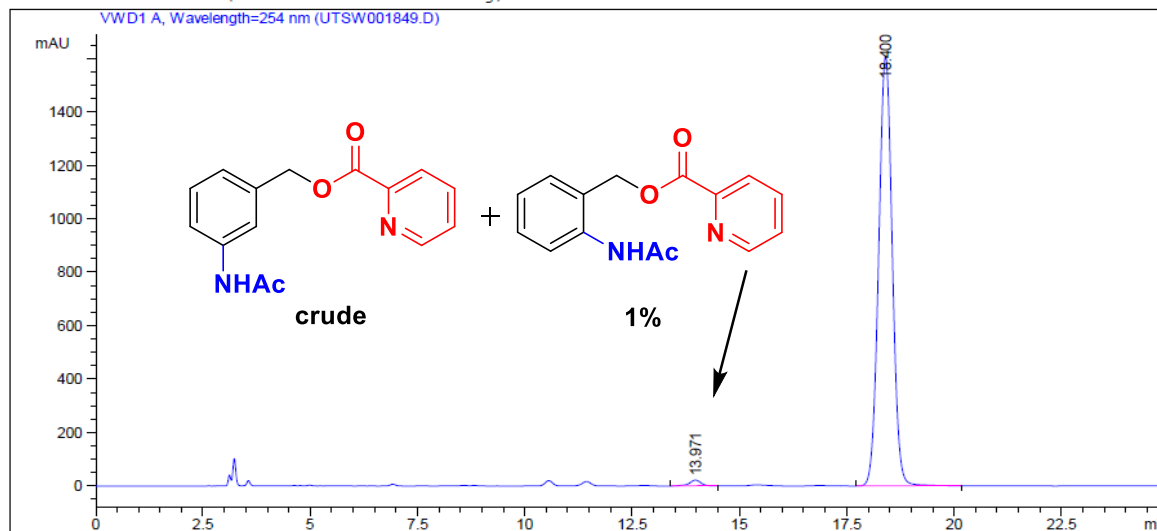

```
=====
Area Percent Report
=====
```

```
Sorted By      : Signal
Multiplier     : 1.0000
Dilution       : 1.0000
Use Multiplier & Dilution Factor with ISTDs
```

Signal 1: VWD1 A, Wavelength=254 nm

| Peak # | RetTime [min] | Type | Width [min] | Area mAU *s | Height [mAU] | Area %  |
|--------|---------------|------|-------------|-------------|--------------|---------|
| 1      | 13.971        | BB   | 0.2827      | 410.07385   | 21.88011     | 1.1432  |
| 2      | 18.400        | BB   | 0.3443      | 3.54604e4   | 1610.13428   | 98.8568 |

Totals : 3.58705e4 1632.01439

**Figure S1e.** Regioselectivity studies – Stacked crude HPLC of *N*-Ac **2** spiked with 1% of analytically pure *ortho*-NHAc **1**

## HPLC analysis conditions:

Column: Agilent Extend-C18,

Column size: 4.6 × 250 mm, 5 μm

Mobile phase: 20% CH<sub>3</sub>CN/H<sub>2</sub>O,

Flow rate: 1.0 mL/min

Data File D:\CHEM32\1\DATA\UTSW001851.D  
Sample Name: SAI-VII-241-CrudeMetawith2%para-2

```
=====
Acq. Operator   : Sailu
Acq. Instrument : Instrument 1          Location : Vial 41
Injection Date  : 11/8/2019 12:24:14 PM
                                           Inj Volume : 10 μl
Method          : D:\CHEM32\1\METHODS\SAILU_METAPROJECT.M
Last changed    : 11/7/2019 6:59:53 PM by Sailu
=====
```

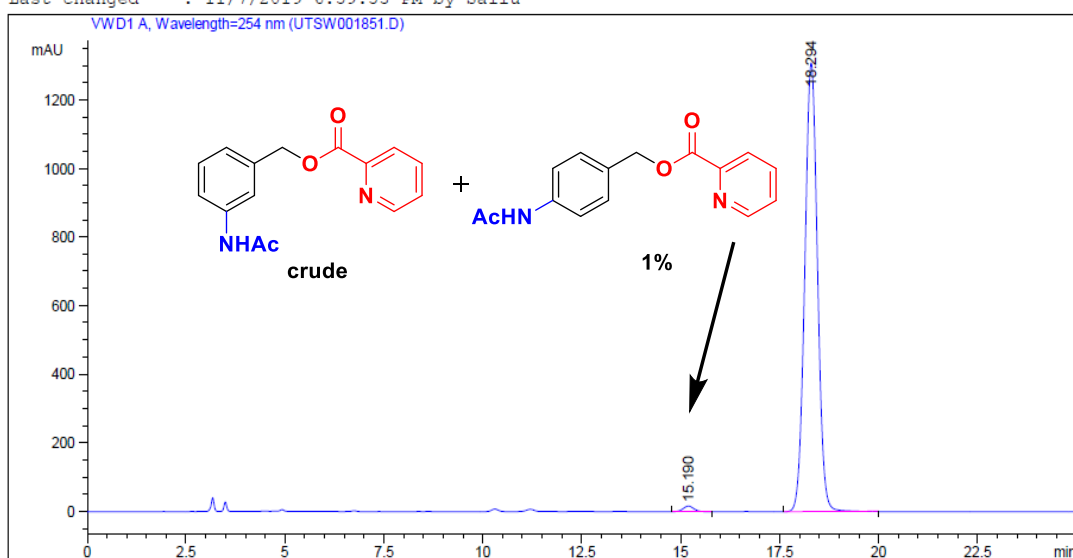

### Area Percent Report

```
=====
Sorted By      : Signal
Multiplier     : 1.0000
Dilution       : 1.0000
Use Multiplier & Dilution Factor with ISTDs
=====
```

Signal 1: VWD1 A, Wavelength=254 nm

| Peak # | RetTime [min] | Type | Width [min] | Area mAU  | Height [mAU] | Area %  |
|--------|---------------|------|-------------|-----------|--------------|---------|
| 1      | 15.190        | BB   | 0.2977      | 313.20578 | 16.45988     | 1.0612  |
| 2      | 18.294        | BB   | 0.3478      | 2.92015e4 | 1308.22070   | 98.9388 |

Totals : 2.95147e4 1324.68059

**Figure S1f.** Regioselectivity studies – Stacked crude HPLC of *N*-Ac **2** spiked with 1% of analytically pure *para*-NHAc **1**
